# Supplementary material for: Pathological Features of Enterovirus 71-Associated Brain and Lung Damage in Mice Based on Quantitative Proteomic Analysis
Source: Front Microbiol. 2021 Jun 18;12:663019. doi: 10.3389/fmicb.2021.663019 (PMC8249819; doi:10.3389/fmicb.2021.663019)
Supplement: Supplementary file 1 [file Table_1.XLSX]

## Sheet: Sheet1
Supplementary Data S1. All Proteins identified in brain specimens from control and EV71-infected mice.
Protein accession	Protein description	Gene name	MW [kDa]	Score	Coverage [%]	Peptides	PSMs	Unique peptides	Control_1	Control_2	Control_3	Control_4	EV71_1	EV71_2	EV71_3	EV71_4	EV71/Control Ratio	EV71/Control p value
A0A087WPF7	Autism susceptibility gene 2 protein homolog OS=Mus musculus OX=10090 GN=Auts2	Auts2	138.92	2.6615	1.2	1	1	1
A2A432	Cullin-4B OS=Mus musculus OX=10090 GN=Cul4b	Cul4b	110.7	102.26	25.8	23	26	14	0.987	0.947	1.006	0.952	1.043	1.016	1.082	0.936	1.048	0.2309
A2A4P0	ATP-dependent RNA helicase DHX8 OS=Mus musculus OX=10090 GN=Dhx8	Dhx8	142.57	-2	2.1	2	2	1
A2A5R2	Brefeldin A-inhibited guanine nucleotide-exchange protein 2 OS=Mus musculus OX=10090 GN=Arfgef2	Arfgef2	202.24	47.526	15.3	27	31	13	1.043	1.024	1.087	1.02	0.918	0.978	0.945	0.961	0.911	0.003316
A2A5Z6	E3 ubiquitin-protein ligase SMURF2 OS=Mus musculus OX=10090 GN=Smurf2	Smurf2	86.174	4.4072	2.8	2	3	1	0.417	0.994	0.888	1.639	1.09	1.222	1.05	0.759	1.046	0.65502
A2A690	Protein TANC2 OS=Mus musculus OX=10090 GN=Tanc2	Tanc2	220.26	190.21	17.4	28	38	28	0.987	1.011	0.998	0.955	1.026	1.056	0.997	1.015	1.036	0.083378
A2A699	Protein FAM171A2 OS=Mus musculus OX=10090 GN=Fam171a2	Fam171a2	87.486	102.47	17.4	12	17	12	0.991	0.986	0.893	0.908	0.987	1.065	1.11	1.066	1.119	0.021622
A2A6A1	G patch domain-containing protein 8 OS=Mus musculus OX=10090 GN=Gpatch8	Gpatch8	164.99	5.3682	1.3	2	2	2	1.083	1.022	0.963	0.969	1.067	1.026	0.817	1.059	0.983	0.76462
A2A6Q5	Cell division cycle protein 27 homolog OS=Mus musculus OX=10090 GN=Cdc27	Cdc27	91.841	9.266	3.3	3	3	3	1.042	0.952	1.013	1.031	0.94	0.997	1.002	1.037	0.985	0.60888
A2A791	Zinc finger MYM-type protein 4 OS=Mus musculus OX=10090 GN=Zmym4	Zmym4	172.44	8.4008	2.8	5	5	5	0.979	0.972	1.016	0.997	0.967	0.988	1.019	0.998	1.002	0.89714
A2A891	Calmodulin-binding transcription activator 1 OS=Mus musculus OX=10090 GN=Camta1	Camta1	184.32	2.8636	0.6	1	1	1
A2A8L1	Chromodomain-helicase-DNA-binding protein 5 OS=Mus musculus OX=10090 GN=Chd5	Chd5	222.51	14.249	7.3	13	16	5	0.958	0.98	1.013	0.949	1.007	1.064	1.046	0.999	1.055	0.042085
A2A8L5	Receptor-type tyrosine-protein phosphatase F OS=Mus musculus OX=10090 GN=Ptprf	Ptprf	211.49	178.51	21.4	30	38	24	1.016	0.973	0.936	0.923	0.968	1.044	1.089	1.01	1.068	0.092802
A2A8U2	Transmembrane protein 201 OS=Mus musculus OX=10090 GN=Tmem201	Tmem201	72.499	1.5137	1.2	1	1	1	0.954	0.953	0.974	0.94	0.977	1.044	1.047	1.122	1.097	0.020584
A2A8Z1	Oxysterol-binding protein-related protein 9 OS=Mus musculus OX=10090 GN=Osbpl9	Osbpl9	83.108	22.036	9.9	8	8	8	0.981	0.929	0.987	0.979	0.98	1.003	1.031	0.974	1.029	0.185681
A2A9Q0	Fibronectin type III domain-containing protein 10 OS=Mus musculus OX=10090 GN=Fndc10	Fndc10	24.416	5.2071	5.4	1	1	1
A2AAE1	Uncharacterized protein KIAA1109 OS=Mus musculus OX=10090 GN=Kiaa1109	Kiaa1109	555.36	11.877	1.5	6	6	6	1.057	0.974	0.983	0.843	1.09	0.927	0.881	0.993	1.009	0.89756
A2AAY5	SH3 and PX domain-containing protein 2B OS=Mus musculus OX=10090 GN=Sh3pxd2b	Sh3pxd2b	101.52	30.654	11.2	10	11	9	0.992	1.045	1.069	0.953	1	0.985	0.993	0.959	0.97	0.32148
A2ACJ2	Fanconi anemia core complex-associated protein 100 OS=Mus musculus OX=10090 GN=Faap100	Faap100	94.28	51.554	10.5	6	9	6	1.072	0.957	1.003	0.928	0.962	1.022	1.04	1.042	1.027	0.482
A2ADY9	Protein DDI1 homolog 2 OS=Mus musculus OX=10090 GN=Ddi2	Ddi2	44.59	30.974	19.3	6	8	6	1.112	0.927	1.017	1.079	0.847	1.046	0.981	1.028	0.944	0.38162
A2AF47	Dedicator of cytokinesis protein 11 OS=Mus musculus OX=10090 GN=Dock11	Dock11	237.77	33.544	5.8	11	12	9	0.935	0.946	0.938	1.041	0.996	1.062	1.076	1.027	1.078	0.050696
A2AFR3	FERM and PDZ domain-containing protein 4 OS=Mus musculus OX=10090 GN=Frmpd4	Frmpd4	144.98	5.156	1.5	2	2	2	0.965	1.045	1.066	0.941	1.011	0.942	1.075	0.97	0.995	0.91542
A2AFS3	UPF0577 protein KIAA1324 OS=Mus musculus OX=10090 GN=Kiaa1324	Kiaa1324	110.68	12.789	4.2	3	3	3	1.086	1.031	1.109	0.982	1.029	0.917	0.953	0.9	0.903	0.043937
A2AG50	MAP7 domain-containing protein 2 OS=Mus musculus OX=10090 GN=Map7d2	Map7d2	86.049	58.879	10.2	7	9	7	0.931	1.175	1.051	1.07	1.109	0.917	0.841	0.931	0.899	0.198
A2AG58	BCLAF1 and THRAP3 family member 3 OS=Mus musculus OX=10090 GN=Bclaf3	Bclaf3	90.11	-2	1.5	1	1	1	1.535	1.576	1.568	1.485	0.487	0.528	0.474	0.378	0.303	0.00048259
A2AGH6	Mediator of RNA polymerase II transcription subunit 12 OS=Mus musculus OX=10090 GN=Med12	Med12	244.56	11.933	1.9	3	3	3	0.879	0.863	0.983	1.063	1.137	0.993	1.236	0.863	1.116	0.30292
A2AGT5	Cytoskeleton-associated protein 5 OS=Mus musculus OX=10090 GN=Ckap5	Ckap5	225.63	323.31	34.1	68	104	68	0.994	0.992	0.996	0.952	0.999	1.032	1.024	0.989	1.028	0.110903
A2AH22	Activating molecule in BECN1-regulated autophagy protein 1 OS=Mus musculus OX=10090 GN=Ambra1	Ambra1	142.88	5.1621	1.9	3	3	3	0.977	1.123	0.995	0.956	0.971	1.085	0.962	0.957	0.981	0.7092
A2AHC3	Calmodulin-regulated spectrin-associated protein 1 OS=Mus musculus OX=10090 GN=Camsap1	Camsap1	175.89	117.16	19.3	27	31	27	0.999	1.03	0.968	0.962	0.975	1.047	1.043	0.985	1.023	0.3911
A2AHJ4	Bromodomain and WD repeat-containing protein 3 OS=Mus musculus OX=10090 GN=Brwd3	Brwd3	202.94	3.7762	1	2	2	2
A2AI08	Taperin OS=Mus musculus OX=10090 GN=Tprn	Tprn	80.088	3.9414	2.4	1	1	1	1.115	1.068		1.129	0.957	0.497		1.249	0.816	0.42556
A2AIV2	Protein virilizer homolog OS=Mus musculus OX=10090 GN=Virma	Virma	201.44	13.365	3.2	6	6	6	0.973	0.813	0.959	1.122	0.953	1.149	1.187	0.868	1.075	0.50676
A2AJ15	Endoplasmic reticulum mannosyl-oligosaccharide 1,2-alpha-mannosidase OS=Mus musculus OX=10090 GN=Man1b1	Man1b1	75.149	8.8991	6.7	4	4	4	1.191	0.937	0.977	0.994	0.963	1.006	0.964	0.978	0.954	0.48622
A2AJA9	Apical junction component 1 homolog OS=Mus musculus OX=10090 GN=Ajm1	Ajm1	107.18	6.9185	3.3	4	4	4
A2AJI0	MAP7 domain-containing protein 1 OS=Mus musculus OX=10090 GN=Map7d1	Map7d1	93.275	33.21	18.2	14	17	13	1.11	1.102	1.027	0.998	1.041	0.895	0.961	0.88	0.891	0.046541
A2AJQ3	Probable C-mannosyltransferase DPY19L4 OS=Mus musculus OX=10090 GN=Dpy19l4	Dpy19l4	83.603	1.7992	1.5	1	1	1	0.914	0.978	0.931	1.033	1.185	0.967	0.902	1.096	1.076	0.344
A2AJT4	Arginine/serine-rich protein PNISR OS=Mus musculus OX=10090 GN=Pnisr	Pnisr	92.114	12.674	6	7	8	7	1.003	1.024	1.077	0.967	0.966	1.016	0.959	0.92	0.948	0.132202
A2AKB4	FERM and PDZ domain-containing protein 1 OS=Mus musculus OX=10090 GN=Frmpd1	Frmpd1	169.21	2.7462	0.6	1	1	1
A2AKG8	Focadhesin OS=Mus musculus OX=10090 GN=Focad	Focad	198.95	27.266	3.6	6	6	6	1.09	1.074	0.962	1.11	0.884	0.975	0.992	0.94	0.895	0.036177
A2ALS5	Rap1 GTPase-activating protein 1 OS=Mus musculus OX=10090 GN=Rap1gap	Rap1gap	73.432	130.43	24.6	15	22	14	1.001	1.066	1.064	1.063	0.985	0.89	0.93	1.003	0.908	0.020982
A2ALU4	Protein Shroom2 OS=Mus musculus OX=10090 GN=Shroom2	Shroom2	164.7	107.88	11.7	15	22	15	0.927	0.999	0.918	0.955	1.054	1.156	1.047	1.043	1.132	0.0073559
A2AN08	E3 ubiquitin-protein ligase UBR4 OS=Mus musculus OX=10090 GN=Ubr4	Ubr4	572.28	323.31	14.8	71	86	71	1.054	1.011	0.989	0.929	1.024	1.007	1.001	0.999	1.012	0.66302
A2AP18	1-phosphatidylinositol 4,5-bisphosphate phosphodiesterase eta-2 OS=Mus musculus OX=10090 GN=Plch2	Plch2	164.3	90.772	7.2	10	10	9	0.943	0.982	0.915	0.983	1.03	1.053	0.983	1.096	1.089	0.025118
A2APV2	Formin-like protein 2 OS=Mus musculus OX=10090 GN=Fmnl2	Fmnl2	123.1	60.532	15.3	18	21	15	0.977	1.021	0.971	1.039	1.026	0.962	1.009	1.03	1.005	0.84112
A2APX8	Sodium channel protein type 1 subunit alpha OS=Mus musculus OX=10090 GN=Scn1a	Scn1a	228.8	35.376	3.3	9	13	6	0.893	0.996	1.051	0.957	0.973	1.026	1.017	1.078	1.051	0.25682
A2APY7	Arginine-hydroxylase NDUFAF5, mitochondrial OS=Mus musculus OX=10090 GN=Ndufaf5	Ndufaf5	38.404	9.0126	9	3	3	3	0.916	0.895	1.019	1.002	1.108	1.004	0.999	1.061	1.089	0.078995
A2AQ19	RNA polymerase-associated protein RTF1 homolog OS=Mus musculus OX=10090 GN=Rtf1	Rtf1	80.796	20.908	12.2	9	9	9	0.962	1.031	0.985	0.995	1.017	1.004	0.985	1.052	1.021	0.32956
A2AQ25	Sickle tail protein OS=Mus musculus OX=10090 GN=Skt	Skt	213.03	18.744	2.9	5	5	5
A2AR02	Peptidyl-prolyl cis-trans isomerase G OS=Mus musculus OX=10090 GN=Ppig	Ppig	88.324	47.929	13.6	11	14	11	0.979	0.969	0.934	0.986	1.012	1.061	1.019	1.026	1.065	0.0077556
A2AR50	Ras-specific guanine nucleotide-releasing factor RalGPS1 OS=Mus musculus OX=10090 GN=Ralgps1	Ralgps1	65.474	26.238	13.7	8	9	7	0.991	1.03	0.933	0.929	0.992	1.05	0.991	1.131	1.072	0.133165
A2ARP1	Inositol hexakisphosphate and diphosphoinositol-pentakisphosphate kinase 1 OS=Mus musculus OX=10090 GN=Ppip5k1	Ppip5k1	159.92	3.7633	3.3	5	5	2	1.039	1.007	1.032	1.134	1.021	0.923	0.889	0.967	0.902	0.040202
A2ARS0	Ankyrin repeat domain-containing protein 63 OS=Mus musculus OX=10090 GN=Ankrd63	Ankrd63	41.067	8.0217	7.2	3	3	3	0.956	1.018	1.071	0.887	1.053	0.929	1.046	1.047	1.036	0.4953
A2ARZ3	Fibrous sheath-interacting protein 2 OS=Mus musculus OX=10090 GN=Fsip2	Fsip2	784.85	-2	0.4	2	2	2	1.098	1.088	1.035	0.922	0.96	0.974	0.865	1.067	0.933	0.28148
A2ASQ1	Agrin OS=Mus musculus OX=10090 GN=Agrn	Agrn	207.54	255.57	19.9	30	35	30	1.052	1.046	1.076	0.949	0.993	0.947	0.986	1.014	0.956	0.2044
A2ASZ8	Calcium-binding mitochondrial carrier protein SCaMC-2 OS=Mus musculus OX=10090 GN=Slc25a25	Slc25a25	52.62	19.038	14.1	7	8	6	0.944	1.049	0.938	1.197	0.967	1.006	0.944	1.006	0.95	0.46442
A2AWA9	Rab GTPase-activating protein 1 OS=Mus musculus OX=10090 GN=Rabgap1	Rabgap1	120.8	178.42	30.3	31	46	29	1.003	1.013	1.022	0.976	1.018	0.987	1.003	0.991	0.996	0.77312
A2AWP8	Rho guanine nucleotide exchange factor 10-like protein OS=Mus musculus OX=10090 GN=Arhgef10l	Arhgef10l	139.99	8.6628	2.7	3	3	3	0.912	1.023	0.951	0.891	1.014	1.003	1.101	1.122	1.123	0.031716
A2BDX3	Adenylyltransferase and sulfurtransferase MOCS3 OS=Mus musculus OX=10090 GN=Mocs3	Mocs3	49.374	75.56	31.5	13	14	13	0.921	1.029	0.975	1.04	0.984	0.986	0.995	1.007	1.002	0.9256
A2BE28	Ribosomal biogenesis protein LAS1L OS=Mus musculus OX=10090 GN=Las1l	Las1l	89.413	21.897	9.1	6	6	6	0.951	1.017	0.965	1.111	0.994	1.037	1.002	0.984	0.993	0.89644
A2BH40	AT-rich interactive domain-containing protein 1A OS=Mus musculus OX=10090 GN=Arid1a	Arid1a	242.09	50.66	7.6	14	15	14	1.038	1.005	1.004	1.024	0.998	1.051	0.965	0.975	0.98	0.3526
A2CG49	Kalirin OS=Mus musculus OX=10090 GN=Kalrn	Kalrn	337	240.64	18.3	48	61	38	0.994	1.01	1.004	0.921	0.996	1.031	1.018	1.051	1.043	0.133338
A2CG63	AT-rich interactive domain-containing protein 4B OS=Mus musculus OX=10090 GN=Arid4b	Arid4b	147.64	1.7231	0.8	1	1	1
A2RSJ4	UHRF1-binding protein 1-like OS=Mus musculus OX=10090 GN=Uhrf1bp1l	Uhrf1bp1l	161.94	53.74	10.9	14	15	14	0.991	1.005	0.944	1.018	1.007	1.1	0.98	1.016	1.037	0.2792
A2RSQ0	DENN domain-containing protein 5B OS=Mus musculus OX=10090 GN=Dennd5b	Dennd5b	144.63	19.93	5	5	5	4	1.008	1.089	0.96	1.032	0.963	0.953	0.976	1.041	0.962	0.28606
A2RT62	F-box/LRR-repeat protein 16 OS=Mus musculus OX=10090 GN=Fbxl16	Fbxl16	51.878	57.367	30.1	10	15	10	1.028	0.96	1.04	0.994	1.007	0.978	0.95	1.066	0.995	0.85884
A2RT91	Ankyrin and armadillo repeat-containing protein OS=Mus musculus OX=10090 GN=Ankar	Ankar	165.29	1.5576	0.6	1	1	1
A2RTL5	Arginine/serine-rich coiled-coil protein 2 OS=Mus musculus OX=10090 GN=Rsrc2	Rsrc2	43.876	4.7335	3.2	1	1	1	1.032	0.96	1.097	1.125	0.957	0.936	0.864	1.036	0.9	0.086057
A2TJV2	Paralemmin-3 OS=Mus musculus OX=10090 GN=Palm3	Palm3	78.787	21.805	6.3	3	3	3	1.183	1.001	1.052	1.019	0.966	0.883	0.931	0.97	0.881	0.028216
A3KGS3	Ral GTPase-activating protein subunit alpha-2 OS=Mus musculus OX=10090 GN=Ralgapa2	Ralgapa2	210.29	4.8296	1.9	3	3	2	0.994	0.967	1.004	1.135	1.031	1.102	0.824	0.957	0.955	0.51048
A3KMP2	Tetratricopeptide repeat protein 38 OS=Mus musculus OX=10090 GN=Ttc38	Ttc38	52.223	9.2052	9.2	4	5	4	1.078	1.08	1.004	0.841	1.066	0.946	0.907	1.126	1.01	0.88552
A4FUP9	Glycosyltransferase 1 domain-containing protein 1 OS=Mus musculus OX=10090 GN=Glt1d1	Glt1d1	38.841	2.7123	2.6	1	1	1
A6BLY7	Keratin, type I cytoskeletal 28 OS=Mus musculus OX=10090 GN=Krt28	Krt28	50.346	1.6735	3.5	2	1	1	1.227	1.146	0.844	1.091	1.073	0.892	0.664	1.074	0.86	0.29574
A6H5Y3	Methionine synthase OS=Mus musculus OX=10090 GN=Mtr	Mtr	139.07	9.5734	4.3	4	4	4	0.931	1.031	0.967	1.083	0.924	0.998	0.962	1.125	0.999	0.9745
A6H5Z3	Exocyst complex component 6B OS=Mus musculus OX=10090 GN=Exoc6b	Exoc6b	94.128	54.318	17.2	13	20	13	0.993	0.988	0.974	0.989	1.026	0.988	0.988	1.01	1.017	0.144219
A6H611	Mitochondrial intermediate peptidase OS=Mus musculus OX=10090 GN=Mipep	Mipep	80.851	6.4693	5.1	4	5	4	1.032	0.959	1.056	1.033	1.036	1.012	0.96	0.923	0.963	0.30436
A6H619	PHD and RING finger domain-containing protein 1 OS=Mus musculus OX=10090 GN=Phrf1	Phrf1	184.08	4.9521	1	2	2	2	0.909	0.904	0.883	1.048	1.026	1.098	1.099	1.053	1.142	0.0191798
A6H630	Protein-glutamate O-methyltransferase OS=Mus musculus OX=10090 GN=Armt1	Armt1	50.548	9.1068	10.5	4	4	4	0.993	1.167	0.976	1.024	0.943	0.894	0.997	1.03	0.929	0.20446
A6H6A9	Rab GTPase-activating protein 1-like OS=Mus musculus OX=10090 GN=Rabgap1l	Rabgap1l	92.403	50.993	12.1	10	10	8	1.032	0.925	1.004	0.93	1.022	1.053	1.067	0.959	1.054	0.195699
A6PWD2	Forkhead-associated domain-containing protein 1 OS=Mus musculus OX=10090 GN=Fhad1	Fhad1	163.73	-2	0.7	1	1	1	0.989	1.001	1.019	0.988	1.039	0.932	0.98	1.06	1.004	0.94372
A6X919	Probable C-mannosyltransferase DPY19L1 OS=Mus musculus OX=10090 GN=Dpy19l1	Dpy19l1	84.186	5.0598	1.9	1	1	1	1.017	1.028	0.955	1.034	0.936	1.029	1.003	1.019	0.988	0.68746
A6X935	Inter alpha-trypsin inhibitor, heavy chain 4 OS=Mus musculus OX=10090 GN=Itih4	Itih4	104.66	12.079	4.9	4	3	3	0.783	0.599	0.716	0.821	1.473	1.197	1.135	1.265	1.737	0.000816
A8C756	Thyroid adenoma-associated protein homolog OS=Mus musculus OX=10090 GN=Thada	Thada	217.29	5.9717	2.2	4	4	4	0.956	0.973	0.955	0.999	1.069	1.025	1.053	0.988	1.065	0.021302
A8Y5H7	SEC14-like protein 1 OS=Mus musculus OX=10090 GN=Sec14l1	Sec14l1	81.215	9.7345	5.5	3	4	3
B0F2B4	Neuroligin 4-like OS=Mus musculus OX=10090 GN=Nlgn4l	Nlgn4l	97.347	50.083	18.7	12	16	9	1.019	1.058	0.971	1.024	0.958	1.015	0.999	0.965	0.967	0.185696
B0V2N1	Receptor-type tyrosine-protein phosphatase S OS=Mus musculus OX=10090 GN=Ptprs	Ptprs	211.9	255.36	23.8	32	57	26	0.979	1.02	0.993	1.005	1.012	1.015	0.998	1.01	1.01	0.3524
B1AR13	CDGSH iron-sulfur domain-containing protein 3, mitochondrial OS=Mus musculus OX=10090 GN=Cisd3	Cisd3	15.676	12.393	37.2	5	6	5	1.054	0.998	1.042	1.054	0.995	0.869	0.894	0.965	0.898	0.0188574
B1AS29	Glutamate receptor ionotropic, kainate 3 OS=Mus musculus OX=10090 GN=Grik3	Grik3	104.05	45.941	9	8	10	8	0.943	0.991	0.982	0.92	1.103	0.999	1.051	1.015	1.087	0.025505
B1AUH1	Receptor-type tyrosine-protein phosphatase U OS=Mus musculus OX=10090 GN=Ptpru	Ptpru	162.49	3.0061	1.5	2	2	1
B1AVZ0	Uracil phosphoribosyltransferase homolog OS=Mus musculus OX=10090 GN=Uprt	Uprt	34.278	12.99	10.6	3	4	3	1.018	1.058	1.002	1.053	0.966	0.964	1.012	0.947	0.941	0.020525
B1AXH1	NHS-like protein 2 OS=Mus musculus OX=10090 GN=Nhsl2	Nhsl2	91.872	16.562	5.2	3	3	3
B1AXV0	DOMON domain-containing protein FRRS1L OS=Mus musculus OX=10090 GN=Frrs1l	Frrs1l	32.506	2.6516	5.1	2	2	2	1.013	1.059	1.086	0.907	1.131	0.968	0.918	0.924	0.969	0.62594
B1AY10	Transcriptional repressor NF-X1 OS=Mus musculus OX=10090 GN=Nfx1	Nfx1	123.81	10.603	2	2	2	2
B1AY13	Ubiquitin carboxyl-terminal hydrolase 24 OS=Mus musculus OX=10090 GN=Usp24	Usp24	294	88.422	9.8	22	24	22	1.043	1.052	0.977	0.984	0.975	1.01	1.02	0.976	0.982	0.44606
B1AZA5	Transmembrane protein 245 OS=Mus musculus OX=10090 GN=Tmem245	Tmem245	97.356	14.44	5.6	5	5	5	1.013	0.959	0.907	1.03	1.036	1.049	0.995	0.986	1.04	0.26206
B1AZI6	THO complex subunit 2 OS=Mus musculus OX=10090 GN=Thoc2	Thoc2	182.77	26.978	5.1	8	9	8	0.991	1.009	1.062	0.933	0.968	1.04	1.052	1.005	1.018	0.60296
B1AZP2	Disks large-associated protein 4 OS=Mus musculus OX=10090 GN=Dlgap4	Dlgap4	108.04	148.68	20.5	16	24	16	1.004	0.998	1.017	0.914	1.098	0.957	1.012	1.015	1.038	0.36138
B2RQC6	CAD protein OS=Mus musculus OX=10090 GN=Cad	Cad	243.24	178.72	13.1	27	36	27	1.051	1.022	1.003	1.118	1.009	0.93	0.963	0.934	0.915	0.025999
B2RR83	Probable ATP-dependent RNA helicase YTHDC2 OS=Mus musculus OX=10090 GN=Ythdc2	Ythdc2	161.09	29.309	5.1	7	10	7	1.035	1.042	1.039	0.966	1.087	0.899	0.987	0.953	0.962	0.38632
B2RRE7	OTU domain-containing protein 4 OS=Mus musculus OX=10090 GN=Otud4	Otud4	123.05	30.726	6.4	5	5	5	1.044	0.962	0.97	1.005	1.017	0.993	1.009	1.013	1.013	0.52154
B2RRF6	Zinc finger protein 518A OS=Mus musculus OX=10090 GN=Znf518a	Znf518a	165.6	1.4835	0.8	1	1	1	1.046	1.06	1.029	1.054	0.972	0.911	1.054	0.895	0.915	0.093964
B2RSH2	Guanine nucleotide-binding protein G(i) subunit alpha-1 OS=Mus musculus OX=10090 GN=Gnai1	Gnai1	40.361	73.037	39.5	13	41	5	1.02	1.005	1.049	0.959	1.016	0.978	1.032	1.054	1.012	0.6491
B2RUJ5	Amyloid-beta A4 precursor protein-binding family A member 1 OS=Mus musculus OX=10090 GN=Apba1	Apba1	92.908	47.885	13.8	10	15	9	0.918	1	1.03	1.047	1.049	0.989	1.011	0.938	0.998	0.96824
B2RUR8	OTU domain-containing protein 7B OS=Mus musculus OX=10090 GN=Otud7b	Otud7b	91.982	2.0981	1.2	1	1	1
B2RW38	Cilia- and flagella-associated protein 58 OS=Mus musculus OX=10090 GN=Cfap58	Cfap58	103.52	2.0325	1.7	2	2	2	1.062	0.939	0.895	0.943	1.097	1.022	1.064	0.99	1.087	0.095181
B2RX14	Terminal uridylyltransferase 4 OS=Mus musculus OX=10090 GN=Zcchc11	Zcchc11	184.65	5.6363	2.2	3	3	2	0.95	1.259	0.724	1.002	0.943	1.065	0.946	1.151	1.043	0.65626
B2RXA1	PI-PLC X domain-containing protein 2 OS=Mus musculus OX=10090 GN=Plcxd2	Plcxd2	38.617	2.5972	2.9	1	1	1
B2RXC1	Trafficking protein particle complex subunit 11 OS=Mus musculus OX=10090 GN=Trappc11	Trappc11	128.39	26.789	9.1	10	12	10	1.006	0.98	1.036	0.98	1.027	0.981	0.98	1.007	0.998	0.92628
B2RXR6	Serine/threonine-protein phosphatase 6 regulatory ankyrin repeat subunit B OS=Mus musculus OX=10090 GN=Ankrd44	Ankrd44	107.38	16.479	4.4	4	4	4	0.844	1.038	0.97	1.05	1.006	1.134	0.952	1.031	1.057	0.39568
B2RXS4	Plexin-B2 OS=Mus musculus OX=10090 GN=Plxnb2	Plxnb2	206.23	144.74	21.5	34	44	33	0.949	0.942	0.946	0.952	1.032	1.09	1.086	1.023	1.117	0.0072381
B2RY04	Dedicator of cytokinesis protein 5 OS=Mus musculus OX=10090 GN=Dock5	Dock5	214.43	1.6288	0.5	1	1	1
B2RY56	RNA-binding protein 25 OS=Mus musculus OX=10090 GN=Rbm25	Rbm25	99.551	24.969	10.4	7	9	7	1.039	0.949	0.962	0.973	1.003	1.093	1.101	0.948	1.057	0.23958
B5KM66	Synaptonemal complex central element protein 3 OS=Mus musculus OX=10090 GN=Syce3	Syce3	10.467	1.527	8	1	1	1	0.963	1.006	1.033	0.917	1.039	0.997	1.016	1.04	1.044	0.166419
B5TVM2	Immunoglobulin-like domain-containing receptor 2 OS=Mus musculus OX=10090 GN=Ildr2	Ildr2	73.235	15.084	6.5	3	3	3	1.018	0.958	1.07	1.045	0.973	0.912	0.934	1.095	0.957	0.36704
B7ZCC9	Adhesion G-protein coupled receptor G4 OS=Mus musculus OX=10090 GN=Adgrg4	Adgrg4	334.21	-2	0.5	1	1	1	1.125	0.942	0.981	0.968	0.932	1.116	0.91	1.036	0.995	0.91992
B7ZMP1	Probable Xaa-Pro aminopeptidase 3 OS=Mus musculus OX=10090 GN=Xpnpep3	Xpnpep3	56.677	10.802	11.7	5	8	5	1.043	1.195	0.536	1.213	1.362	0.54		1.104	1.005	0.96092
B9EHT4	CAP-Gly domain-containing linker protein 3 OS=Mus musculus OX=10090 GN=Clip3	Clip3	59.586	60.671	30	14	14	14	0.953	0.946	0.977	1.076	0.912	0.982	1.058	0.988	0.997	0.94462
B9EJ80	PDZ domain-containing protein 8 OS=Mus musculus OX=10090 GN=Pdzd8	Pdzd8	127.74	29.578	7.4	8	9	8	1.038	1.065	1.065	0.929	0.933	1.063	1.002	0.93	0.959	0.39184
B9EJ86	Oxysterol-binding protein-related protein 8 OS=Mus musculus OX=10090 GN=Osbpl8	Osbpl8	101.27	113.2	13.2	9	11	8	1.059	0.905	0.959	0.888	1.01	1.047	1.037	0.991	1.072	0.135401
B9EJA2	Cortactin-binding protein 2 OS=Mus musculus OX=10090 GN=Cttnbp2	Cttnbp2	178.77	53.909	10.6	16	20	15	0.99	0.974	1.092	0.957	1.06	0.942	0.994	0.992	0.994	0.88416
B9EKI3	TATA element modulatory factor OS=Mus musculus OX=10090 GN=Tmf1	Tmf1	121.8	6.8432	2.9	3	3	3	0.942	1	1.063	1.111	1.057	0.924	0.893	1.018	0.946	0.33316
B9EKR1	Receptor-type tyrosine-protein phosphatase zeta OS=Mus musculus OX=10090 GN=Ptprz1	Ptprz1	254.4	157.87	10.3	25	66	25	1.02	0.963	0.987	0.983	1.01	0.975	1.002	1.021	1.014	0.4032
C0HK80	Adipocyte-related X-chromosome expressed sequence 2 OS=Mus musculus OX=10090 GN=Arxes2	Arxes2	20.146	9.0229	15.6	3	6	3	0.976	0.931	0.957	1.014	1.019	1.029	0.982	1.042	1.05	0.067559
C0HKD9	Microfibrillar-associated protein 1B OS=Mus musculus OX=10090 GN=Mfap1b	Mfap1b	51.954	40.307	14.8	6	7	6	0.991	0.964	0.985	1.033	1.036	1.108	1.014	0.944	1.032	0.42768
C3VPR6	Protein NLRC5 OS=Mus musculus OX=10090 GN=Nlrc5	Nlrc5	211.71	-2	0.9	1	1	1	1.149	0.987	1.098	1.046	1.025	0.869	0.835	0.989	0.869	0.052561
D0G895	Angiotensin-converting enzyme-like protein Ace3 OS=Mus musculus OX=10090 GN=Ace3	Ace3	85.873	-2	1.6	1	1	1	1.018	0.848	1.06	0.993	1.023	1.152	1.032	0.885	1.044	0.58246
D3YVF0	A-kinase anchor protein 5 OS=Mus musculus OX=10090 GN=Akap5	Akap5	79.396	323.31	45.5	22	30	22	0.978	0.984	0.99	0.967	1.058	0.975	0.982	1.049	1.037	0.20358
D3YXK1	Atherin OS=Mus musculus OX=10090 GN=Samd1	Samd1	54.532	-2	1.9	1	1	1
D3YXK2	Scaffold attachment factor B1 OS=Mus musculus OX=10090 GN=Safb	Safb	105.1	230.05	26.9	22	50	16	0.968	0.956	1.011	1.019	0.981	1.034	1.064	0.985	1.028	0.32114
D3YZI9	PiggyBac transposable element-derived protein 5 OS=Mus musculus OX=10090 GN=Pgbd5	Pgbd5	58.3	10.252	5.9	2	2	2
D3YZP9	Coiled-coil domain-containing protein 6 OS=Mus musculus OX=10090 GN=Ccdc6	Ccdc6	52.938	28.044	11.1	5	5	5	1.183	0.787	1.066	1.061	1.016	0.861	1.131	0.896	0.953	0.70286
D3YZU1	SH3 and multiple ankyrin repeat domains protein 1 OS=Mus musculus OX=10090 GN=Shank1	Shank1	226.31	127.6	13.7	24	29	24	1.044	1.025	1.049	0.932	0.98	0.977	0.983	1.028	0.98	0.54136
D3Z4S3	Putative peptidyl-tRNA hydrolase PTRHD1 OS=Mus musculus OX=10090 GN=Ptrhd1	Ptrhd1	16.037	9.0789	19.3	3	5	3	0.92	0.92	1.066	0.951	1.034	1.013	0.976	1.065	1.06	0.182155
D3Z7P3	Glutaminase kidney isoform, mitochondrial OS=Mus musculus OX=10090 GN=Gls	Gls	73.963	211.82	36.6	18	46	18	0.99	1.041	1.026	0.969	1.001	0.981	1.001	0.959	0.979	0.3217
E0CZ16	Kelch-like protein 3 OS=Mus musculus OX=10090 GN=Klhl3	Klhl3	64.921	2.0255	1.4	1	1	1
E1U8D0	Protein SOGA1 OS=Mus musculus OX=10090 GN=Soga1	Soga1	159.18	94.365	13.2	16	17	15	1.022	1.082	1.023	1.038	0.984	0.942	0.938	0.932	0.911	0.0022249
E9PUL5	Proline-rich transmembrane protein 2 OS=Mus musculus OX=10090 GN=Prrt2	Prrt2	35.923	45.752	24.3	6	11	6	1.064	1.044	0.975	0.997	1.149	0.961	0.963	0.93	0.981	0.68702
E9PV24	Fibrinogen alpha chain OS=Mus musculus OX=10090 GN=Fga	Fga	87.428	204.74	25.6	18	28	18	0.536	0.536	0.528	0.681	1.413	1.693	1.248	1.297	2.477	6.0406e-05
E9PVA8	eIF-2-alpha kinase activator GCN1 OS=Mus musculus OX=10090 GN=Gcn1	Gcn1	293.02	237.19	23.6	57	72	57	1.004	1.014	1	1.018	0.996	1.011	1.006	0.965	0.986	0.24186
E9PVD3	Protocadherin-16 OS=Mus musculus OX=10090 GN=Dchs1	Dchs1	346.38	37.215	4.5	12	13	12	0.947	0.955	0.947	0.964	1.023	1	1.017	0.973	1.052	0.0054023
E9PY46	Intraflagellar transport protein 140 homolog OS=Mus musculus OX=10090 GN=Ift140	Ift140	165.87	4.7879	1.1	2	2	2	0.985	1.023	1.063	0.989	0.982	0.988	1.091	0.899	0.975	0.5589
E9PZ19	Protein turtle homolog B OS=Mus musculus OX=10090 GN=Igsf9b	Igsf9b	144.95	5.487	2.5	3	3	3	0.839	0.858	1.072	1.026	1.068	0.98	1.093	1.07	1.11	0.152785
E9PZJ8	Activating signal cointegrator 1 complex subunit 3 OS=Mus musculus OX=10090 GN=Ascc3	Ascc3	250.55	30.263	5	11	13	11	0.946	0.983	0.992	0.979	1.005	0.998	1.027	1.007	1.035	0.028403
E9PZM4	Chromodomain-helicase-DNA-binding protein 2 OS=Mus musculus OX=10090 GN=Chd2	Chd2	210.8	11.438	0.9	1	1	1
E9Q394	A-kinase anchor protein 13 OS=Mus musculus OX=10090 GN=Akap13	Akap13	303.97	-2	0.4	1	2	1	1	1.048	1.066	1.02	1.032	0.922	0.973	0.952	0.938	0.059316
E9Q3L2	Phosphatidylinositol 4-kinase alpha OS=Mus musculus OX=10090 GN=Pi4ka	Pi4ka	237.04	147.81	14.3	27	33	27	1.033	1.017	0.998	0.959	1.001	0.954	1.003	1.005	0.989	0.612
E9Q401	Ryanodine receptor 2 OS=Mus musculus OX=10090 GN=Ryr2	Ryr2	564.81	104.67	6.6	29	32	29	1.014	0.979	1.041	1.002	1.006	0.993	0.937	1.018	0.98	0.38902
E9Q414	Apolipoprotein B-100 OS=Mus musculus OX=10090 GN=Apob	Apob	509.43	3.0016	0.4	2	2	2	0.924	0.834	0.864	1.115	1.173	1.124	1.049	0.933	1.145	0.141879
E9Q4N7	AT-rich interactive domain-containing protein 1B OS=Mus musculus OX=10090 GN=Arid1b	Arid1b	237.79	50.285	6.8	13	14	13	0.993	0.91	0.983	0.982	1.055	1.012	1.055	0.97	1.058	0.095577
E9Q4P1	WD repeat and FYVE domain-containing protein 1 OS=Mus musculus OX=10090 GN=Wdfy1	Wdfy1	46.217	63.425	27.8	10	13	10	0.942	0.934	0.969	1.106	0.981	1.069	1.005	1.003	1.027	0.53466
E9Q4S1	High affinity cAMP-specific and IBMX-insensitive 3',5'-cyclic phosphodiesterase 8B OS=Mus musculus OX=10090 GN=Pde8b	Pde8b	96.738	2.6527	1.2	1	1	1	1.018	1.03	0.912	1.098	0.978	0.949	0.969	1.065	0.976	0.63634
E9Q555	E3 ubiquitin-protein ligase RNF213 OS=Mus musculus OX=10090 GN=Rnf213	Rnf213	584.78	11.158	0.6	3	3	3	0.735	0.607	0.623	0.702	1.026	1.127	1.577	1.614	2.004	0.00158269
E9Q5C9	Nucleolar and coiled-body phosphoprotein 1 OS=Mus musculus OX=10090 GN=Nolc1	Nolc1	73.697	29.702	8.1	5	11	5	1.014	0.984	0.996	0.99	1.039	1.02	1.054	0.896	1.006	0.91708
E9Q5F9	Histone-lysine N-methyltransferase SETD2 OS=Mus musculus OX=10090 GN=Setd2	Setd2	285.66	6.1751	0.9	2	2	2	0.919	0.951	1.003	1.132	1.065	1.041	0.956	0.949	1.001	0.9523
E9Q5G3	Kinesin-like protein KIF23 OS=Mus musculus OX=10090 GN=Kif23	Kif23	108.77	-2	0.9	1	1	1
E9Q5K9	YTH domain-containing protein 1 OS=Mus musculus OX=10090 GN=Ythdc1	Ythdc1	85.648	11.074	5.7	5	6	5	1.017	1.034	1.025	0.992	0.901	0.95	1.116	0.987	0.972	0.54618
E9Q612	Receptor-type tyrosine-protein phosphatase O OS=Mus musculus OX=10090 GN=Ptpro	Ptpro	138.59	33.403	5.5	5	5	5	1.093	0.993	0.942	1.014	1.026	1.076	0.953	0.92	0.983	0.72708
E9Q6C8	XK-related protein 6 OS=Mus musculus OX=10090 GN=Xkr6	Xkr6	70.927	2.2054	2.4	1	1	1	1.077	0.946	1.075	0.828	1.284	0.928	0.734	1.107	1.032	0.90798
E9Q6J5	Biorientation of chromosomes in cell division protein 1-like 1 OS=Mus musculus OX=10090 GN=Bod1l	Bod1l	327.45	24.095	2.7	7	7	7	1.02	0.976	0.996	0.957	0.988	1.147	1.02	0.927	1.034	0.53922
E9Q6P5	Tetratricopeptide repeat protein 7B OS=Mus musculus OX=10090 GN=Ttc7b	Ttc7b	94.202	52.992	15.7	12	15	12	1.002	0.99	1.012	0.984	1.061	0.946	1.003	1.016	1.01	0.7343
E9Q735	Ubiquitin conjugation factor E4 A OS=Mus musculus OX=10090 GN=Ube4a	Ube4a	118.2	54.78	14.1	12	14	12	0.981	1.026	0.918	0.993	1.053	1.005	1.041	0.891	1.018	0.71938
E9Q784	Zinc finger CCCH domain-containing protein 13 OS=Mus musculus OX=10090 GN=Zc3h13	Zc3h13	203.75	7.3367	2.1	4	4	4	0.912	0.898	1.079	0.998	0.983	1.107	1.073	0.965	1.062	0.30124
E9Q7E2	AT-rich interactive domain-containing protein 2 OS=Mus musculus OX=10090 GN=Arid2	Arid2	195.99	2.2748	0.5	1	1	1
E9Q7G0	Nuclear mitotic apparatus protein 1 OS=Mus musculus OX=10090 GN=Numa1	Numa1	235.63	160.92	21.2	39	42	39	1.003	0.987	0.964	1.051	1.007	1.025	1.001	0.97	1	0.99308
E9Q7T7	Chondroadherin-like protein OS=Mus musculus OX=10090 GN=Chadl	Chadl	81.36	7.3981	9.4	6	6	6	1.135	1.05	0.949	1.078	0.918	0.944	0.852	1.088	0.903	0.15162
E9Q8I9	Protein furry homolog OS=Mus musculus OX=10090 GN=Fry	Fry	339.09	156.11	12.3	34	43	34	1	1.016	0.982	0.941	1.026	0.987	1.04	1.002	1.029	0.199542
E9Q942	Small integral membrane protein 13 OS=Mus musculus OX=10090 GN=Smim13	Smim13	9.9543	1.6128	9.1	1	2	1	0.859	0.99	1.017	0.972	0.893	1.231	0.969	1.092	1.09	0.34636
E9Q9D5	Rab-like protein 2A OS=Mus musculus OX=10090 GN=Rabl2	Rabl2	25.61	13.027	24.2	4	5	4	0.931	0.698	1.011	1.008	1.174	1.211	1.171	0.804	1.195	0.22768
E9Q9R9	Disks large homolog 5 OS=Mus musculus OX=10090 GN=Dlg5	Dlg5	214.38	11.373	2.9	5	5	5	0.998	0.979	0.975	0.94	0.965	1.119	1.066	0.981	1.061	0.169399
E9QAG8	Zinc finger protein 431 OS=Mus musculus OX=10090 GN=Znf431	Znf431	61.28	1.7824	6.8	2	4	0
F6SEU4	Ras/Rap GTPase-activating protein SynGAP OS=Mus musculus OX=10090 GN=Syngap1	Syngap1	148.24	323.31	33.7	40	62	38	1.003	0.97	1.029	0.867	1.016	0.992	1.091	1.044	1.071	0.154536
F6ZDS4	Nucleoprotein TPR OS=Mus musculus OX=10090 GN=Tpr	Tpr	273.99	298.76	23.7	54	67	54	0.97	1.004	0.988	1.01	1.042	1.018	0.986	1.003	1.019	0.24408
F8VPU2	FERM, ARHGEF and pleckstrin domain-containing protein 1 OS=Mus musculus OX=10090 GN=Farp1	Farp1	118.87	205.17	30.1	29	52	29	1.007	0.959	0.98	0.89	1.036	1.053	1.069	1.027	1.091	0.0198403
G3X9J0	Signal-induced proliferation-associated 1-like protein 3 OS=Mus musculus OX=10090 GN=Sipa1l3	Sipa1l3	195.06	9.1452	3.9	5	5	4	0.877	1.085	1.058	1.078	1.066	1.008	0.87	0.974	0.956	0.5338
G3X9K3	Brefeldin A-inhibited guanine nucleotide-exchange protein 1 OS=Mus musculus OX=10090 GN=Arfgef1	Arfgef1	208.5	287.55	24.1	38	46	24	1.075	1.01	1.011	1.003	0.996	0.94	0.973	1.009	0.956	0.091019
G3XA57	Rab11 family-interacting protein 2 OS=Mus musculus OX=10090 GN=Rab11fip2	Rab11fip2	58.206	31.569	18.2	7	10	7	0.988	1.037	0.997	1.009	0.866	0.997	1.07	0.982	0.971	0.53166
G5E829	Plasma membrane calcium-transporting ATPase 1 OS=Mus musculus OX=10090 GN=Atp2b1	Atp2b1	134.75	323.31	34.7	39	126	26	1	1.015	1.025	0.945	1.015	0.98	1.012	1.009	1.008	0.69664
G5E870	E3 ubiquitin-protein ligase TRIP12 OS=Mus musculus OX=10090 GN=Trip12	Trip12	224.13	61.508	6.6	11	12	11	0.994	1.022	0.92	1.075	0.9	0.996	0.965	1.074	0.981	0.70342
G5E8F4	Fucose-1-phosphate guanylyltransferase OS=Mus musculus OX=10090 GN=Fpgt	Fpgt	65.361	3.7563	3.1	1	1	1
G5E8K5	Ankyrin-3 OS=Mus musculus OX=10090 GN=Ank3	Ank3	214.06	113.05	18.2	31	49	24	0.974	1.005	0.993	1.025	0.997	0.985	1.013	1.013	1.003	0.82964
J3QM76	Coiled-coil domain-containing protein 179 OS=Mus musculus OX=10090 GN=Ccdc179	Ccdc179	7.928	-2	13.4	1	1	1	0.861	1.109	1.099	1.027	1.21	1.025	0.748	0.927	0.955	0.64512
O08529	Calpain-2 catalytic subunit OS=Mus musculus OX=10090 GN=Capn2	Capn2	79.871	139.89	29.7	17	31	17	1.016	0.982	0.979	1.046	1.006	0.991	0.968	1.034	0.994	0.78696
O08532	Voltage-dependent calcium channel subunit alpha-2/delta-1 OS=Mus musculus OX=10090 GN=Cacna2d1	Cacna2d1	124.63	287.36	35.4	37	69	35	0.997	1.008	0.991	0.977	1.002	1.007	0.979	1.042	1.014	0.36726
O08539	Myc box-dependent-interacting protein 1 OS=Mus musculus OX=10090 GN=Bin1	Bin1	64.469	323.31	40	25	56	23	1.007	1.008	1.003	0.95	1.011	0.981	0.988	1.017	1.007	0.67208
O08547	Vesicle-trafficking protein SEC22b OS=Mus musculus OX=10090 GN=Sec22b	Sec22b	24.74	110.25	54.9	13	24	13	1.006	1.027	1.027	1.027	0.982	1.03	0.987	0.962	0.969	0.083601
O08553	Dihydropyrimidinase-related protein 2 OS=Mus musculus OX=10090 GN=Dpysl2	Dpysl2	62.277	323.31	68.2	31	210	26	0.963	0.974	0.959	0.947	1.021	1.041	1.046	1	1.069	0.00132093
O08573	Galectin-9 OS=Mus musculus OX=10090 GN=Lgals9	Lgals9	40.035	14.216	7.1	2	3	2	0.695	0.628	0.671	0.77	1.066	1.27	1.294	1.614	1.897	0.00055931
O08576	RUN domain-containing protein 3A OS=Mus musculus OX=10090 GN=Rundc3a	Rundc3a	50.018	59.419	21.7	8	10	7	0.983	0.979	1.02	1.006	0.992	0.986	0.935	1.039	0.991	0.69844
O08579	Emerin OS=Mus musculus OX=10090 GN=Emd	Emd	29.435	42.548	42.1	9	14	9	0.965	1.062	1.03	0.983	0.992	1	0.964	1.014	0.983	0.5118
O08582	GTP-binding protein 1 OS=Mus musculus OX=10090 GN=Gtpbp1	Gtpbp1	72.3	77.899	22.9	13	18	13	1.004	1.004	0.976	1.03	0.964	1.044	1.021	0.994	1.002	0.92602
O08583	THO complex subunit 4 OS=Mus musculus OX=10090 GN=Alyref	Alyref	26.94	79.732	39.2	8	17	5	0.906	1.031	1.019	0.817	0.992	1.126	1.112	0.99	1.118	0.129096
O08585	Clathrin light chain A OS=Mus musculus OX=10090 GN=Clta	Clta	25.604	11.631	19.6	6	9	6	0.931	1.089	1.04	1.05	0.955	0.998	0.938	0.979	0.942	0.158036
O08586	Phosphatidylinositol 3,4,5-trisphosphate 3-phosphatase and dual-specificity protein phosphatase PTEN OS=Mus musculus OX=10090 GN=Pten	Pten	47.152	41.235	22.8	8	10	8	1.007	0.981	1.027	1.056	0.98	1.01	0.988	1.044	0.988	0.58756
O08599	Syntaxin-binding protein 1 OS=Mus musculus OX=10090 GN=Stxbp1	Stxbp1	67.568	290.43	59.3	35	115	35	0.992	1	0.976	0.971	1.036	0.994	1.001	1.021	1.029	0.051958
O08600	Endonuclease G, mitochondrial OS=Mus musculus OX=10090 GN=Endog	Endog	32.19	10.937	11.2	3	3	3	0.917	1.026	0.922	1.074	0.936	1.079	1.056	1.019	1.038	0.47298
O08605	MAP kinase-interacting serine/threonine-protein kinase 1 OS=Mus musculus OX=10090 GN=Mknk1	Mknk1	47.914	6.8218	2.8	1	1	1
O08638	Myosin-11 OS=Mus musculus OX=10090 GN=Myh11	Myh11	227.03	25.389	12.4	24	42	6	0.909	1.19	0.975	1.11	0.943	1.021	0.926	0.959	0.92	0.26968
O08644	Ephrin type-B receptor 6 OS=Mus musculus OX=10090 GN=Ephb6	Ephb6	110.11	5.2295	2.8	2	2	2
O08648	Mitogen-activated protein kinase kinase kinase 4 OS=Mus musculus OX=10090 GN=Map3k4	Map3k4	179.83	11.457	3.1	5	5	5	0.982	0.957	1.069	0.975	0.923	1.143	0.907	1.057	1.012	0.89914
O08663	Methionine aminopeptidase 2 OS=Mus musculus OX=10090 GN=Metap2	Metap2	52.921	62.86	29.9	11	25	11	0.998	0.974	0.991	1.046	0.961	0.992	0.936	1.007	0.972	0.24742
O08665	Semaphorin-3A OS=Mus musculus OX=10090 GN=Sema3a	Sema3a	88.812	-2	1.6	1	1	1	1.024	0.996	1.009	0.906	1.169	0.949	1.015	0.938	1.035	0.608
O08672	Kinesin-like protein KIFC2 OS=Mus musculus OX=10090 GN=Kifc2	Kifc2	85.685	5.4307	1.4	1	1	1	0.874	0.943	1.091	1.228	0.934	0.829	1.023	1.09	0.937	0.54662
O08677	Kininogen-1 OS=Mus musculus OX=10090 GN=Kng1	Kng1	73.101	103.73	16	8	12	8	0.74	0.63	0.771	0.8	1.329	1.342	1.217	1.115	1.701	0.00023613
O08688	Calpain-5 OS=Mus musculus OX=10090 GN=Capn5	Capn5	72.954	71.122	28.6	17	21	17	1.037	0.98	1.016	0.964	0.999	0.984	1.061	1.013	1.015	0.5452
O08691	Arginase-2, mitochondrial OS=Mus musculus OX=10090 GN=Arg2	Arg2	38.878	25.7	6.5	2	2	2
O08692	Neutrophilic granule protein OS=Mus musculus OX=10090 GN=Ngp	Ngp	19.331	1.628	12.6	2	2	2
O08709	Peroxiredoxin-6 OS=Mus musculus OX=10090 GN=Prdx6	Prdx6	24.87	52.836	53.6	11	26	11	0.987	0.982	1.064	1.001	1.048	0.939	0.915	1.018	0.972	0.45452
O08715	A-kinase anchor protein 1, mitochondrial OS=Mus musculus OX=10090 GN=Akap1	Akap1	92.194	44.101	8.8	4	4	4	1.004	1.033	0.946	1.135	0.913	1.046	0.89	1.057	0.949	0.39592
O08738	Caspase-6 OS=Mus musculus OX=10090 GN=Casp6	Casp6	31.595	16.012	17	5	6	5	1.081	0.935	0.939	0.988	1.003	0.983	1.036	0.847	0.981	0.7313
O08739	AMP deaminase 3 OS=Mus musculus OX=10090 GN=Ampd3	Ampd3	88.651	38.37	16.2	12	13	12	1.076	1.05	0.992	1.199	0.922	0.917	0.88	0.981	0.857	0.01548
O08740	DNA-directed RNA polymerase II subunit RPB11 OS=Mus musculus OX=10090 GN=Polr2j	Polr2j	13.251	6.8527	24.8	3	3	3
O08749	Dihydrolipoyl dehydrogenase, mitochondrial OS=Mus musculus OX=10090 GN=Dld	Dld	54.272	95.893	30.3	14	37	14	0.983	1.023	1.003	1.077	0.996	0.981	0.981	0.985	0.965	0.176679
O08756	3-hydroxyacyl-CoA dehydrogenase type-2 OS=Mus musculus OX=10090 GN=Hsd17b10	Hsd17b10	27.418	60.459	33	7	15	7	1.03	1.044	0.986	0.999	0.991	0.991	0.95	0.939	0.954	0.049363
O08759	Ubiquitin-protein ligase E3A OS=Mus musculus OX=10090 GN=Ube3a	Ube3a	99.818	151.84	30.5	26	45	26	1.026	1.035	0.995	1.007	1.007	0.989	0.975	1.002	0.978	0.099444
O08784	Treacle protein OS=Mus musculus OX=10090 GN=Tcof1	Tcof1	135	68.969	14	16	19	16	0.944	0.982	0.974	0.971	1.02	1.049	1.053	1.052	1.078	0.00059712
O08788	Dynactin subunit 1 OS=Mus musculus OX=10090 GN=Dctn1	Dctn1	141.67	323.31	41.2	43	85	43	1.012	0.986	0.995	1.016	0.985	0.998	1.016	1.004	0.999	0.8817
O08795	Glucosidase 2 subunit beta OS=Mus musculus OX=10090 GN=Prkcsh	Prkcsh	58.792	53.758	16.5	9	12	9	1.153	1.17	1.115	0.984	0.87	0.921	0.872	0.922	0.811	0.0027602
O08807	Peroxiredoxin-4 OS=Mus musculus OX=10090 GN=Prdx4	Prdx4	31.052	39.131	25.2	6	17	5	1.014	1.015	0.973	1.038	0.987	0.982	0.992	0.977	0.975	0.165501
O08808	Protein diaphanous homolog 1 OS=Mus musculus OX=10090 GN=Diaph1	Diaph1	139.34	61.498	15.9	18	20	18	0.951	1.017	1.003	1	0.978	1.052	1.022	0.984	1.016	0.50138
O08810	116 kDa U5 small nuclear ribonucleoprotein component OS=Mus musculus OX=10090 GN=Eftud2	Eftud2	109.36	155.11	36.3	31	47	30	0.955	0.941	0.978	1.04	1	1.061	1.056	1.025	1.058	0.070803
O08842	GDNF family receptor alpha-2 OS=Mus musculus OX=10090 GN=Gfra2	Gfra2	51.726	54.587	23.9	8	9	8	0.926	0.961	0.872	1.02	1.057	1.105	0.985	1.146	1.136	0.033038
O08848	60 kDa SS-A/Ro ribonucleoprotein OS=Mus musculus OX=10090 GN=Trove2	Trove2	60.123	57.554	22.9	13	18	13	1.027	1.029	0.996	1.061	0.964	0.983	0.969	0.96	0.942	0.0053601
O08908	Phosphatidylinositol 3-kinase regulatory subunit beta OS=Mus musculus OX=10090 GN=Pik3r2	Pik3r2	81.265	46.463	21.6	13	14	10	1.047	1.096	1.002	1.078	0.968	1.001	1.067	0.996	0.955	0.154181
O08912	Polypeptide N-acetylgalactosaminyltransferase 1 OS=Mus musculus OX=10090 GN=Galnt1	Galnt1	64.254	24.139	9.1	5	5	5	1.055	1.061	1.024	1.019	0.92	0.941	0.909	1.085	0.927	0.160838
O08914	Fatty-acid amide hydrolase 1 OS=Mus musculus OX=10090 GN=Faah	Faah	63.221	47.287	16.1	8	11	8	1.034	1.02	1.057	1.019	0.973	0.896	1.019	0.975	0.935	0.05276
O08915	AH receptor-interacting protein OS=Mus musculus OX=10090 GN=Aip	Aip	37.605	81.187	41.2	11	15	11	0.974	0.981	0.939	0.946	1.031	1.067	1.071	1.036	1.095	0.00078201
O08917	Flotillin-1 OS=Mus musculus OX=10090 GN=Flot1	Flot1	47.513	108.55	43.7	16	25	16	1.061	1.061	1	1.006	0.978	0.962	0.943	1.014	0.944	0.042321
O08919	Numb-like protein OS=Mus musculus OX=10090 GN=Numbl	Numbl	64.13	81.649	29.5	19	27	15	0.984	0.982	0.97	0.944	1.022	1.067	1.037	1.04	1.074	0.00161696
O08967	Cytohesin-3 OS=Mus musculus OX=10090 GN=Cyth3	Cyth3	46.279	93.737	29.8	11	15	6	1.012	0.984	1.05	0.925	0.999	0.982	1.02	1.038	1.017	0.56586
O08989	Ras-related protein M-Ras OS=Mus musculus OX=10090 GN=Mras	Mras	23.901	22.527	28.8	6	8	6	1.098	0.976	1.021	0.994	1.006	0.961	0.954	1.042	0.969	0.38656
O08997	Copper transport protein ATOX1 OS=Mus musculus OX=10090 GN=Atox1	Atox1	7.3384	26.54	60.3	4	7	4	0.975	1.027	1.007	0.922	0.975	1.026	1.106	1.071	1.063	0.143763
O09005	Sphingolipid delta(4)-desaturase DES1 OS=Mus musculus OX=10090 GN=Degs1	Degs1	38.241	12.093	4.6	1	1	1	0.888	0.827	1.098	1.035	1.062	1.026	1.144	0.929	1.081	0.3383
O09012	Peroxisomal targeting signal 1 receptor OS=Mus musculus OX=10090 GN=Pex5	Pex5	70.755	51.552	20.7	11	14	11	0.996	1.105	1.016	1.076	0.964	0.944	0.907	0.984	0.906	0.0165593
O09044	Synaptosomal-associated protein 23 OS=Mus musculus OX=10090 GN=Snap23	Snap23	23.261	11.218	11.4	2	7	1	0.988	1.087	0.93	1.153	0.896	1.015	0.974	0.987	0.931	0.25702
O09061	Proteasome subunit beta type-1 OS=Mus musculus OX=10090 GN=Psmb1	Psmb1	26.372	102.82	40	10	19	10	0.961	0.988	0.954	1.016	1.022	1.009	1.03	1.015	1.04	0.038916
O09106	Histone deacetylase 1 OS=Mus musculus OX=10090 GN=Hdac1	Hdac1	55.074	20.721	16.8	7	10	4	1.066	1.019	0.93	1.079	0.945	0.951	0.986	0.974	0.942	0.147896
O09111	NADH dehydrogenase [ubiquinone] 1 beta subcomplex subunit 11, mitochondrial OS=Mus musculus OX=10090 GN=Ndufb11	Ndufb11	17.444	47.309	45	4	14	4	1.014	1.017	1.022	1.056	0.956	1.012	0.974	1.047	0.971	0.22598
O09114	Prostaglandin-H2 D-isomerase OS=Mus musculus OX=10090 GN=Ptgds	Ptgds	21.066	17.532	28.6	7	18	7	0.863	0.742	0.762	0.652	1.104	1.471	1.311	1.124	1.659	0.0012987
O09117	Synaptophysin-like protein 1 OS=Mus musculus OX=10090 GN=Sypl1	Sypl1	28.899	2.6219	3.4	1	1	1
O09118	Netrin-1 OS=Mus musculus OX=10090 GN=Ntn1	Ntn1	67.81	18.901	6.3	3	3	3	0.907	1.073	0.87	1.095	1.206	1.122	0.813	0.934	1.033	0.81754
O09126	Semaphorin-4D OS=Mus musculus OX=10090 GN=Sema4d	Sema4d	95.639	40.238	12.5	10	11	10	0.959	1.019	0.981	1.003	1.069	1.024	1.029	0.956	1.029	0.33054
O09131	Glutathione S-transferase omega-1 OS=Mus musculus OX=10090 GN=Gsto1	Gsto1	27.497	38.676	33.3	12	22	12	0.991	1.019	0.958	0.905	0.988	1.054	1.032	1.018	1.057	0.102261
O09159	Lysosomal alpha-mannosidase OS=Mus musculus OX=10090 GN=Man2b1	Man2b1	114.65	9.4728	3.8	4	4	4	0.882	1.025	1.021	0.994	0.967	1.136	1.057	0.989	1.058	0.3104
O09164	Extracellular superoxide dismutase [Cu-Zn] OS=Mus musculus OX=10090 GN=Sod3	Sod3	27.392	14.244	20.3	4	5	4	1.133	0.904	1.033	0.961	1.251	1.041	0.834	0.975	1.017	0.91996
O09167	60S ribosomal protein L21 OS=Mus musculus OX=10090 GN=Rpl21	Rpl21	18.562	29.988	41.2	6	13	6	0.977	1.072	1.064	0.92	0.991	1.004	0.966	0.967	0.974	0.53994
O09172	Glutamate--cysteine ligase regulatory subunit OS=Mus musculus OX=10090 GN=Gclm	Gclm	30.534	49.58	35	8	10	8	1.002	1.005	1.004	1.018	0.99	0.98	0.978	0.972	0.973	0.00195726
O09174	Alpha-methylacyl-CoA racemase OS=Mus musculus OX=10090 GN=Amacr	Amacr	41.704	4.0434	8.7	3	3	3
O35066	Kinesin-like protein KIF3C OS=Mus musculus OX=10090 GN=Kif3c	Kif3c	89.972	8.3457	10.4	9	15	3
O35071	Kinesin-like protein KIF1C OS=Mus musculus OX=10090 GN=Kif1c	Kif1c	122.43	2.8158	5.5	6	14	0
O35075	Down syndrome critical region protein 3 homolog OS=Mus musculus OX=10090 GN=Dscr3	Dscr3	32.97	80.292	31.3	7	9	7	0.931	0.973	0.988	1.022	1.036	0.98	1.013	1.047	1.041	0.14352
O35083	1-acyl-sn-glycerol-3-phosphate acyltransferase alpha OS=Mus musculus OX=10090 GN=Agpat1	Agpat1	31.709	54.742	16.1	3	6	3	0.972	1.149	1.028	1.009	1.009	0.923	0.897	0.947	0.908	0.072683
O35089	Protein cornichon homolog 2 OS=Mus musculus OX=10090 GN=Cnih2	Cnih2	18.931	4.5349	6.2	1	1	1	0.916	0.921	1.058	0.964	1.133	1.046	1.03	0.94	1.075	0.20616
O35098	Dihydropyrimidinase-related protein 4 OS=Mus musculus OX=10090 GN=Dpysl4	Dpysl4	61.961	284.03	57.3	27	77	24	0.937	0.963	0.953	0.977	1.015	1.055	1.058	1.045	1.09	0.00056433
O35099	Mitogen-activated protein kinase kinase kinase 5 OS=Mus musculus OX=10090 GN=Map3k5	Map3k5	154.51	10.093	4	5	5	5	0.965	1.075	1.017	1.031	0.989	0.968	0.921	1.051	0.961	0.2994
O35114	Lysosome membrane protein 2 OS=Mus musculus OX=10090 GN=Scarb2	Scarb2	54.043	36.795	15.5	7	11	7	0.953	0.99	0.926	0.974	0.997	1.152	1.011	1.035	1.092	0.052584
O35126	Atrophin-1 OS=Mus musculus OX=10090 GN=Atn1	Atn1	123.72	8.1757	1.3	1	1	1	0.987	1.093	1.029	0.954	1.02	1.086	1.02	0.835	0.975	0.66882
O35127	Protein C10 OS=Mus musculus OX=10090 GN=Grcc10	Grcc10	13.194	29.018	43.7	4	6	4	1.001	0.987	1.05	0.968	1.047	1.028	0.997	0.988	1.013	0.559
O35129	Prohibitin-2 OS=Mus musculus OX=10090 GN=Phb2	Phb2	33.296	100.69	54.2	17	33	17	0.967	1.018	0.971	1.023	0.986	1.036	1.003	1.001	1.012	0.53822
O35134	DNA-directed RNA polymerase I subunit RPA1 OS=Mus musculus OX=10090 GN=Polr1a	Polr1a	194.11	1.766	0.6	1	1	1
O35136	Neural cell adhesion molecule 2 OS=Mus musculus OX=10090 GN=Ncam2	Ncam2	93.203	192.04	27.5	20	46	20	0.985	0.981	0.967	1.014	1.011	1.025	0.983	1.033	1.027	0.126061
O35143	ATPase inhibitor, mitochondrial OS=Mus musculus OX=10090 GN=Atpif1	Atpif1	12.159	1.9458	16	2	2	2	0.986	1.065	0.92	1.012	0.997	1.054	1.02	0.972	1.015	0.6656
O35144	Telomeric repeat-binding factor 2 OS=Mus musculus OX=10090 GN=Terf2	Terf2	60.263	28.094	10.7	5	5	5	1.019	0.967	0.981	0.905	1.129	1.051	1.011	0.946	1.068	0.193842
O35153	BET1-like protein OS=Mus musculus OX=10090 GN=Bet1l	Bet1l	12.428	8.4608	13.5	1	1	1	0.996	0.856	1.08	1.016	0.857	1.23	1.026	0.956	1.031	0.79162
O35166	Golgi SNAP receptor complex member 2 OS=Mus musculus OX=10090 GN=Gosr2	Gosr2	24.725	9.9711	10.4	2	2	2	0.948	0.941	1.086	1.099	0.921	0.968	1.156	0.901	0.969	0.64478
O35188	Fractalkine OS=Mus musculus OX=10090 GN=Cx3cl1	Cx3cl1	42.098	29.43	9.6	3	3	3	1.189	0.945	0.902	0.854	1.106	0.977	0.967	1.062	1.057	0.46532
O35215	D-dopachrome decarboxylase OS=Mus musculus OX=10090 GN=Ddt	Ddt	13.077	50.01	51.7	6	9	6	1.014	0.978	0.992	1.072	1.004	0.997	0.966	0.969	0.97	0.2355
O35218	Cleavage and polyadenylation specificity factor subunit 2 OS=Mus musculus OX=10090 GN=Cpsf2	Cpsf2	88.382	21.516	7.3	6	8	6	0.994	0.977	1.007	0.988	0.942	1.034	1.043	0.98	1.008	0.77218
O35226	26S proteasome non-ATPase regulatory subunit 4 OS=Mus musculus OX=10090 GN=Psmd4	Psmd4	40.703	93.721	35.9	12	23	12	1.014	0.99	1	1.013	0.991	1.025	0.982	0.951	0.983	0.33094
O35231	Kinesin-like protein KIFC3 OS=Mus musculus OX=10090 GN=Kifc3	Kifc3	92.555	16.566	11.3	8	9	7	0.999	1.098	1.043	1.03	0.915	1.004	0.946	0.986	0.924	0.032141
O35239	Tyrosine-protein phosphatase non-receptor type 9 OS=Mus musculus OX=10090 GN=Ptpn9	Ptpn9	67.969	36.062	15	9	10	9	1.013	1.006	0.956	1.02	1.09	0.998	0.965	1.006	1.016	0.6272
O35250	Exocyst complex component 7 OS=Mus musculus OX=10090 GN=Exoc7	Exoc7	79.959	168.25	40.7	25	35	25	0.999	0.968	0.984	0.958	0.987	1.055	1.027	1.03	1.049	0.029144
O35280	Serine/threonine-protein kinase Chk1 OS=Mus musculus OX=10090 GN=Chek1	Chek1	54.381	1.8189	3.4	2	2	2	1.123	0.93	0.982	0.992	1.01	1.024	0.95	0.999	0.989	0.84194
O35286	Pre-mRNA-splicing factor ATP-dependent RNA helicase DHX15 OS=Mus musculus OX=10090 GN=Dhx15	Dhx15	91.006	111.16	32.1	24	49	23	0.992	0.957	0.956	0.968	0.98	1.096	1.061	0.998	1.068	0.057217
O35295	Transcriptional activator protein Pur-beta OS=Mus musculus OX=10090 GN=Purb	Purb	33.901	87.085	39.5	11	23	10	0.986	0.981	1.035	1.059	1.042	0.933	0.954	1.01	0.97	0.3643
O35316	Sodium- and chloride-dependent taurine transporter OS=Mus musculus OX=10090 GN=Slc6a6	Slc6a6	69.855	22.714	5.3	3	7	2	1.006	0.84	1.071	0.754	1.138	1.244	1.032	0.932	1.184	0.141397
O35326	Serine/arginine-rich splicing factor 5 OS=Mus musculus OX=10090 GN=Srsf5	Srsf5	30.891	20.858	23.8	7	10	6	0.905	0.874	0.934	0.877	1.092	1.171	1.112	1.068	1.238	0.000142122
O35343	Importin subunit alpha-3 OS=Mus musculus OX=10090 GN=Kpna4	Kpna4	57.922	45.22	22.1	10	15	4	0.996	1.083	0.936	0.967	0.974	1.104	1.017	0.949	1.016	0.74886
O35344	Importin subunit alpha-4 OS=Mus musculus OX=10090 GN=Kpna3	Kpna3	57.772	58.006	19.8	11	15	5	1.07	0.971	1.053	1.019	0.93	1.011	1.016	0.987	0.959	0.2057
O35345	Importin subunit alpha-7 OS=Mus musculus OX=10090 GN=Kpna6	Kpna6	59.964	86.292	19.6	9	12	7	0.966	1.046	1.104	1.077	0.83	0.953	1	1.044	0.913	0.15486
O35350	Calpain-1 catalytic subunit OS=Mus musculus OX=10090 GN=Capn1	Capn1	82.105	33.845	16.8	11	14	11	1.059	0.992	1.042	1.117	1.012	0.927	0.964	0.971	0.92	0.034323
O35375	Neuropilin-2 OS=Mus musculus OX=10090 GN=Nrp2	Nrp2	104.63	67.774	15.9	14	16	14	1.001	0.969	0.99	0.952	0.961	1.059	1.041	1.038	1.048	0.10668
O35381	Acidic leucine-rich nuclear phosphoprotein 32 family member A OS=Mus musculus OX=10090 GN=Anp32a	Anp32a	28.537	53.223	30	9	19	6	0.909	0.965	1.031	1.099	1.036	0.978	1.012	0.98	1	0.95162
O35382	Exocyst complex component 4 OS=Mus musculus OX=10090 GN=Exoc4	Exoc4	110.54	121.16	21	20	30	20	1.04	1.05	1.015	0.936	1.038	1.024	0.993	0.933	0.987	0.7245
O35386	Phytanoyl-CoA dioxygenase, peroxisomal OS=Mus musculus OX=10090 GN=Phyh	Phyh	38.607	3.8335	4.7	2	2	2	0.879	0.856	0.715	1.05	0.996	1.311	1.172	1.057	1.296	0.037884
O35387	HCLS1-associated protein X-1 OS=Mus musculus OX=10090 GN=Hax1	Hax1	31.654	6.1705	12.5	4	5	4	1.321	1.226	0.901	0.938	1.131	0.857	0.935	0.746	0.837	0.22136
O35393	Ephrin-B3 OS=Mus musculus OX=10090 GN=Efnb3	Efnb3	35.884	70.795	32.6	9	10	9	0.989	0.965	0.935	0.983	1.023	1.105	1.024	0.996	1.071	0.037463
O35405	Phospholipase D3 OS=Mus musculus OX=10090 GN=Pld3	Pld3	54.388	37.568	17	7	12	7	0.987	0.996	0.951	0.894	1.104	0.981	1.048	1.046	1.092	0.043636
O35409	Glutamate carboxypeptidase 2 OS=Mus musculus OX=10090 GN=Folh1	Folh1	84.573	3.0231	2.1	2	2	2	1.038	1.03	1.021	0.877	0.945	0.928	0.975	1.192	1.019	0.83158
O35435	Dihydroorotate dehydrogenase (quinone), mitochondrial OS=Mus musculus OX=10090 GN=Dhodh	Dhodh	42.699	16.065	15.4	6	7	6	0.966	0.889	0.986	1.047	0.997	1.013	1.046	0.992	1.041	0.2879
O35449	Proline-rich transmembrane protein 1 OS=Mus musculus OX=10090 GN=Prrt1	Prrt1	31.389	5.2661	8.5	2	3	2	1.057	0.96	1.022	1.067	0.999	0.935	0.987	0.982	0.951	0.123262
O35450	FK506-binding protein-like OS=Mus musculus OX=10090 GN=Fkbpl	Fkbpl	38.301	3.0211	4.3	1	1	1
O35454	Chloride transport protein 6 OS=Mus musculus OX=10090 GN=Clcn6	Clcn6	96.979	66.143	11.7	7	8	7	1.059	1.038	0.947	1.116	0.935	0.943	0.909	1.071	0.927	0.181058
O35459	Delta(3,5)-Delta(2,4)-dienoyl-CoA isomerase, mitochondrial OS=Mus musculus OX=10090 GN=Ech1	Ech1	36.118	43.485	26.6	8	10	8	0.962	0.966	0.911	1.03	0.992	1.061	1.009	1.016	1.054	0.115036
O35465	Peptidyl-prolyl cis-trans isomerase FKBP8 OS=Mus musculus OX=10090 GN=Fkbp8	Fkbp8	43.528	50.272	19.9	7	13	7	1.02	0.999	1.059	1.04	0.996	0.932	0.93	1.011	0.94	0.046941
O35469	3 beta-hydroxysteroid dehydrogenase/Delta 5-->4-isomerase type 6 OS=Mus musculus OX=10090 GN=Hsd3b6	Hsd3b6	41.977	-2	2.4	1	1	1	1.082	1.024	0.996	0.933	0.967	0.847	1.083	1.078	0.985	0.78746
O35474	EGF-like repeat and discoidin I-like domain-containing protein 3 OS=Mus musculus OX=10090 GN=Edil3	Edil3	53.711	12.023	7.9	4	4	4	1.005	1.086	1.054	0.905	1.023	1.018	1.127	0.805	0.981	0.77712
O35495	Cyclin-dependent kinase 14 OS=Mus musculus OX=10090 GN=Cdk14	Cdk14	52.995	13.261	11.9	5	6	4	1.062	0.957	0.918	0.929	1.08	0.976	1.012	1.074	1.071	0.140942
O35526	Syntaxin-1A OS=Mus musculus OX=10090 GN=Stx1a	Stx1a	33.054	132.58	36.1	12	28	10	1.007	1.011	1.035	0.94	0.994	0.956	1.002	1.032	0.998	0.94156
O35544	Excitatory amino acid transporter 4 OS=Mus musculus OX=10090 GN=Slc1a6	Slc1a6	60.784	6.2265	7	3	13	1	0.929	0.738	0.854	1.656	0.916	0.866	1.023	1.043	0.921	0.86434
O35551	Rab GTPase-binding effector protein 1 OS=Mus musculus OX=10090 GN=Rabep1	Rabep1	99.523	144.4	28.2	24	30	24	1.033	1.019	0.93	1.025	1.004	0.994	1.017	0.988	0.999	0.9951
O35566	CD151 antigen OS=Mus musculus OX=10090 GN=Cd151	Cd151	28.246	1.7775	3.2	1	1	1	1.206	1.037	0.989	0.988	0.985	0.968	0.857	0.978	0.898	0.114242
O35593	26S proteasome non-ATPase regulatory subunit 14 OS=Mus musculus OX=10090 GN=Psmd14	Psmd14	34.577	57.427	25.8	8	14	8	1.024	0.992	1.057	0.994	0.963	0.994	1.011	0.99	0.973	0.184924
O35594	Intraflagellar transport protein 81 homolog OS=Mus musculus OX=10090 GN=Ift81	Ift81	79.284	3.3394	2.8	2	2	2
O35598	Disintegrin and metalloproteinase domain-containing protein 10 OS=Mus musculus OX=10090 GN=Adam10	Adam10	83.967	35.34	11.1	6	7	6	1.084	1.111	0.985	0.986	1.015	0.923	0.978	0.936	0.925	0.088361
O35604	NPC intracellular cholesterol transporter 1 OS=Mus musculus OX=10090 GN=Npc1	Npc1	142.88	7.822	2	2	2	2
O35607	Bone morphogenetic protein receptor type-2 OS=Mus musculus OX=10090 GN=Bmpr2	Bmpr2	115.02	34.301	10.7	9	9	9	1.06	1.052	1.033	0.97	0.996	0.885	0.947	0.992	0.928	0.07032
O35609	Secretory carrier-associated membrane protein 3 OS=Mus musculus OX=10090 GN=Scamp3	Scamp3	38.458	87.378	39.5	12	16	12	1.026	1.021	1.034	1.052	0.915	1.008	0.943	0.981	0.931	0.0177035
O35618	Protein Mdm4 OS=Mus musculus OX=10090 GN=Mdm4	Mdm4	54.963	3.4984	2.9	1	1	1
O35621	Phosphomannomutase 1 OS=Mus musculus OX=10090 GN=Pmm1	Pmm1	29.774	61.118	40.5	9	14	7	1.043	1.032	0.983	0.979	1.009	0.995	0.988	0.98	0.984	0.39784
O35633	Vesicular inhibitory amino acid transporter OS=Mus musculus OX=10090 GN=Slc32a1	Slc32a1	57.38	71.782	25.3	11	14	11	0.972	1.005	0.968	1.07	1.016	0.974	1.008	1.033	1.004	0.86782
O35638	Cohesin subunit SA-2 OS=Mus musculus OX=10090 GN=Stag2	Stag2	141.28	25.745	10.2	13	13	9	1.016	0.945	0.987	0.988	1.001	1.016	1.077	0.918	1.019	0.64
O35639	Annexin A3 OS=Mus musculus OX=10090 GN=Anxa3	Anxa3	36.384	76.046	39.6	12	16	12	1.076	0.994	0.948	1.068	0.954	0.954	0.963	1.024	0.953	0.22542
O35643	AP-1 complex subunit beta-1 OS=Mus musculus OX=10090 GN=Ap1b1	Ap1b1	103.93	107.25	34.8	34	73	16	1.003	1.015	1.01	1.013	0.991	0.964	0.978	1.009	0.976	0.047761
O35658	Complement component 1 Q subcomponent-binding protein, mitochondrial OS=Mus musculus OX=10090 GN=C1qbp	C1qbp	31.013	58.055	15.1	4	15	4	0.98	0.932	0.982	1.03	1.041	1.001	0.983	1.035	1.035	0.21074
O35668	Huntingtin-associated protein 1 OS=Mus musculus OX=10090 GN=Hap1	Hap1	70.115	87.968	34.7	18	25	18	0.928	1.004	0.869	1.24	1.034	1.049	0.841	0.982	0.967	0.76794
O35678	Monoglyceride lipase OS=Mus musculus OX=10090 GN=Mgll	Mgll	33.387	45.667	28.7	8	10	8	1.02	0.975	0.951	1.038	1.058	0.951	0.997	1.032	1.014	0.68002
O35681	Synaptotagmin-3 OS=Mus musculus OX=10090 GN=Syt3	Syt3	63.253	51.09	21.8	12	15	11	0.975	1.012	0.936	1.055	1.01	0.983	0.972	1.041	1.007	0.8062
O35682	Myeloid-associated differentiation marker OS=Mus musculus OX=10090 GN=Myadm	Myadm	35.284	34.173	7.8	2	7	2	1.014	1.085	1.035	1.001	1.056	0.929	0.929	0.988	0.944	0.146124
O35683	NADH dehydrogenase [ubiquinone] 1 alpha subcomplex subunit 1 OS=Mus musculus OX=10090 GN=Ndufa1	Ndufa1	8.1384	2.4094	14.3	1	2	1
O35684	Neuroserpin OS=Mus musculus OX=10090 GN=Serpini1	Serpini1	46.347	9.5659	7.3	3	4	3	0.957	0.838	0.936	0.999	0.989	1.24	1.1	1.021	1.166	0.051476
O35685	Nuclear migration protein nudC OS=Mus musculus OX=10090 GN=Nudc	Nudc	38.358	154.79	45.5	15	45	15	1.052	1.043	1.063	1.056	0.969	0.91	0.94	0.938	0.892	0.000139546
O35691	Pinin OS=Mus musculus OX=10090 GN=Pnn	Pnn	82.435	94.469	25	16	21	16	0.983	0.954	0.948	1.014	1.01	1.05	1.02	1.01	1.049	0.036882
O35704	Serine palmitoyltransferase 1 OS=Mus musculus OX=10090 GN=Sptlc1	Sptlc1	52.534	17.297	15	7	9	7	0.954	1.055	0.939	1.075	0.981	1.032	1.082	0.911	0.996	0.93206
O35709	Ectoderm-neural cortex protein 1 OS=Mus musculus OX=10090 GN=Enc1	Enc1	66.112	8.4426	5.4	3	3	3	1.087	1.135	1.093	0.94	0.963	0.886	1.046	0.868	0.884	0.084081
O35710	Nocturnin OS=Mus musculus OX=10090 GN=Noct	Noct	48.3	17.047	11	3	4	3	1.366	1.121	0.804	1.079	1.018	0.933	0.929	0.775	0.836	0.22738
O35730	E3 ubiquitin-protein ligase RING1 OS=Mus musculus OX=10090 GN=Ring1	Ring1	42.63	-2	5.7	2	2	1	0.999	0.967	1.034	1.02	1	1.004	1.047	0.945	0.994	0.81288
O35737	Heterogeneous nuclear ribonucleoprotein H OS=Mus musculus OX=10090 GN=Hnrnph1	Hnrnph1	49.199	203.66	42.3	15	59	6	0.994	0.965	0.988	0.986	0.984	1.056	1.006	0.991	1.026	0.183801
O35841	Apoptosis inhibitor 5 OS=Mus musculus OX=10090 GN=Api5	Api5	56.784	71.499	27.6	13	22	13	0.969	0.977	0.981	1.053	1.007	1.02	0.958	1.012	1.004	0.85618
O35855	Branched-chain-amino-acid aminotransferase, mitochondrial OS=Mus musculus OX=10090 GN=Bcat2	Bcat2	44.127	36.012	15.5	4	5	4	0.995	0.972	1.023	1.031	1.048	0.916	0.991	1.032	0.992	0.78172
O35857	Mitochondrial import inner membrane translocase subunit TIM44 OS=Mus musculus OX=10090 GN=Timm44	Timm44	51.091	97.163	36.9	15	24	15	0.993	0.956	1.036	1.051	0.958	0.972	0.973	1.047	0.979	0.49222
O35864	COP9 signalosome complex subunit 5 OS=Mus musculus OX=10090 GN=Cops5	Cops5	37.548	66.193	36.5	10	20	10	0.991	0.989	0.962	0.984	1.009	0.983	1	1.011	1.02	0.083263
O35874	Neutral amino acid transporter A OS=Mus musculus OX=10090 GN=Slc1a4	Slc1a4	56.061	119.05	21.2	8	14	8	1.003	1.012	1.013	0.963	1.076	0.996	1.017	0.93	1.007	0.86274
O35887	Calumenin OS=Mus musculus OX=10090 GN=Calu	Calu	37.063	182.34	51.1	14	32	14	1.031	1.057	1.059	1.075	0.951	0.959	0.918	0.973	0.9	0.00043765
O35900	U6 snRNA-associated Sm-like protein LSm2 OS=Mus musculus OX=10090 GN=Lsm2	Lsm2	10.834	51.74	38.9	3	4	3	0.922	0.909	0.98	1.018	1.073	1.05	1.03	0.986	1.081	0.0498
O35926	Cyclin-dependent kinase 5 activator 2 OS=Mus musculus OX=10090 GN=Cdk5r2	Cdk5r2	38.923	31.672	11.1	3	3	3	1.114	1.09	1.098	0.871	1.109	0.813	0.902	1.002	0.917	0.35812
O35927	Catenin delta-2 OS=Mus musculus OX=10090 GN=Ctnnd2	Ctnnd2	135	270.46	28.1	31	45	28	0.983	1.004	0.977	0.958	1.018	1.01	1.041	1.029	1.045	0.0093441
O35943	Frataxin, mitochondrial OS=Mus musculus OX=10090 GN=Fxn	Fxn	22.924	6.3755	8.7	2	2	2
O35954	Membrane-associated phosphatidylinositol transfer protein 1 OS=Mus musculus OX=10090 GN=Pitpnm1	Pitpnm1	134.94	323.31	30	25	37	24	0.962	0.988	0.954	0.961	1.021	1.056	1.033	1.026	1.07	0.00072095
O35955	Proteasome subunit beta type-10 OS=Mus musculus OX=10090 GN=Psmb10	Psmb10	29.063	1.4958	2.6	1	1	1	0.809	0.613	0.667	0.658	1.048	1.114	1.429	1.664	1.913	0.002083
O35963	Ras-related protein Rab-33B OS=Mus musculus OX=10090 GN=Rab33b	Rab33b	25.766	26.342	28.8	5	5	4	0.989	1.005	0.955	0.936	1.086	1.031	0.992	1.02	1.063	0.050522
O35969	Guanidinoacetate N-methyltransferase OS=Mus musculus OX=10090 GN=Gamt	Gamt	26.336	14.511	8.9	1	2	1	0.932	0.895	0.996	1.116	1.065	1.105	0.946	0.958	1.034	0.59122
O35988	Syndecan-4 OS=Mus musculus OX=10090 GN=Sdc4	Sdc4	21.482	11.626	18.7	3	5	3	0.798	0.983	1.001	0.7	0.989	1.338	1.03	1.177	1.302	0.050962
O54692	Centromere/kinetochore protein zw10 homolog OS=Mus musculus OX=10090 GN=Zw10	Zw10	88.062	22.9	12.2	9	10	9	1.032	0.983	1.089	1.044	0.984	0.973	0.975	0.93	0.931	0.027655
O54724	Caveolae-associated protein 1 OS=Mus musculus OX=10090 GN=Cavin1	Cavin1	43.953	11.895	13.5	5	5	5	1.097	1.074	0.918	1.059	1.059	0.999	0.86	0.951	0.933	0.2858
O54734	Dolichyl-diphosphooligosaccharide--protein glycosyltransferase 48 kDa subunit OS=Mus musculus OX=10090 GN=Ddost	Ddost	49.027	57.626	22.7	10	16	10	1.025	0.947	1.075	1.024	0.988	0.985	0.993	0.99	0.972	0.37066
O54750	Cytochrome P450 2J6 OS=Mus musculus OX=10090 GN=Cyp2j6	Cyp2j6	57.791	1.9341	1.6	1	1	1	1.117	0.974	1.004	0.925	0.968	1.079	0.905	1.037	0.992	0.89596
O54774	AP-3 complex subunit delta-1 OS=Mus musculus OX=10090 GN=Ap3d1	Ap3d1	135.08	221.13	27.6	32	56	32	1.014	1.049	1.03	0.967	1.005	0.98	1.007	0.984	0.979	0.31678
O54781	SRSF protein kinase 2 OS=Mus musculus OX=10090 GN=Srpk2	Srpk2	76.756	43.264	15	10	14	8	1.03	1.007	0.951	0.981	0.998	1.013	1.055	1.01	1.027	0.24886
O54782	Epididymis-specific alpha-mannosidase OS=Mus musculus OX=10090 GN=Man2b2	Man2b2	115.61	2.6997	1	1	1	1	0.916	0.951	0.93	1.095	0.948	1.044	1.041	1.096	1.061	0.2813
O54784	Death-associated protein kinase 3 OS=Mus musculus OX=10090 GN=Dapk3	Dapk3	51.421	2.0022	3.8	2	2	2
O54786	DNA fragmentation factor subunit alpha OS=Mus musculus OX=10090 GN=Dffa	Dffa	36.572	38.403	23	6	8	6	0.998	1.051	0.993	1.005	0.996	0.995	0.928	1.006	0.97	0.22264
O54818	Tumor protein D53 OS=Mus musculus OX=10090 GN=Tpd52l1	Tpd52l1	22.515	10.6	11.8	2	3	2	0.969	0.987	0.911	1.017	1.058	1.027	0.98	1.067	1.064	0.08488
O54829	Regulator of G-protein signaling 7 OS=Mus musculus OX=10090 GN=Rgs7	Rgs7	54.791	63.77	21.1	11	20	8	0.999	0.966	1.013	0.984	0.971	0.97	1.014	1.05	1.011	0.64758
O54833	Casein kinase II subunit alpha' OS=Mus musculus OX=10090 GN=Csnk2a2	Csnk2a2	41.215	99.863	46.6	13	21	13	0.973	0.97	1.004	0.908	1.017	1.007	1.075	1.026	1.07	0.037659
O54865	Guanylate cyclase soluble subunit beta-1 OS=Mus musculus OX=10090 GN=Gucy1b1	Gucy1b1	70.597	112.22	32.1	20	31	20	1.034	1.052	1.029	0.981	1.022	0.904	0.976	1.027	0.959	0.246
O54879	High mobility group protein B3 OS=Mus musculus OX=10090 GN=Hmgb3	Hmgb3	23.01	37.293	24.5	6	8	6	0.88	0.878	1.046	1.139	0.977	1.055	1.065	0.995	1.038	0.55426
O54901	OX-2 membrane glycoprotein OS=Mus musculus OX=10090 GN=Cd200	Cd200	31.256	38.66	24.8	8	22	8	0.995	0.982	0.962	0.957	1.04	1.045	1.063	1.008	1.067	0.0040621
O54916	RalBP1-associated Eps domain-containing protein 1 OS=Mus musculus OX=10090 GN=Reps1	Reps1	86.518	36.386	12.7	9	10	8	0.955	0.942	0.961	0.955	1.02	1.126	1.025	1.03	1.102	0.027803
O54929	WD repeat and SOCS box-containing protein 2 OS=Mus musculus OX=10090 GN=Wsb2	Wsb2	45.261	2.8189	3.2	1	1	1
O54931	A-kinase anchor protein 2 OS=Mus musculus OX=10090 GN=Akap2	Akap2	98.577	68.822	11.6	10	10	10	0.933	1.051	0.966	1.036	1.055	0.994	0.99	0.972	1.006	0.84172
O54940	BCL2/adenovirus E1B 19 kDa protein-interacting protein 2 OS=Mus musculus OX=10090 GN=Bnip2	Bnip2	37.768	1.7278	2.5	1	1	1	1.125	1.037	1.011	0.832	1.02	1.037	0.873	1.069	0.999	0.98558
O54941	SWI/SNF-related matrix-associated actin-dependent regulator of chromatin subfamily E member 1 OS=Mus musculus OX=10090 GN=Smarce1	Smarce1	46.638	59.807	21.9	8	13	7	1.055	1.015	1.022	0.956	1.001	1.125	0.925	0.944	0.987	0.76032
O54946	DnaJ homolog subfamily B member 6 OS=Mus musculus OX=10090 GN=Dnajb6	Dnajb6	39.807	23.016	20	7	10	6	1.015	1.017	1.054	0.99	0.993	1.065	0.974	1.02	0.994	0.798
O54950	5'-AMP-activated protein kinase subunit gamma-1 OS=Mus musculus OX=10090 GN=Prkag1	Prkag1	37.52	27.742	23.9	7	9	5	1.01	0.947	0.862	0.938	1.047	1.083	0.992	1.135	1.133	0.027201
O54951	Semaphorin-6B OS=Mus musculus OX=10090 GN=Sema6b	Sema6b	95.466	9.8788	2.4	2	3	1
O54962	Barrier-to-autointegration factor OS=Mus musculus OX=10090 GN=Banf1	Banf1	10.102	63.501	42.7	3	3	3	0.9	0.765	1.011	0.924	0.916	1.21	1.162	1.123	1.225	0.054324
O54983	Ketimine reductase mu-crystallin OS=Mus musculus OX=10090 GN=Crym	Crym	33.523	113.85	43.1	12	35	12	1.033	1.013	0.989	0.861	0.998	0.979	1.066	1.033	1.046	0.33874
O54984	ATPase Asna1 OS=Mus musculus OX=10090 GN=Asna1	Asna1	38.822	19.058	23	6	11	6	1.04	0.941	1.023	1.057	0.946	0.973	1.016	1.055	0.983	0.6372
O54988	STE20-like serine/threonine-protein kinase OS=Mus musculus OX=10090 GN=Slk	Slk	141.46	77.856	17.4	19	21	19	0.961	1.023	0.987	1.01	1.005	1.014	0.927	1.004	0.992	0.75522
O54990	Prominin-1 OS=Mus musculus OX=10090 GN=Prom1	Prom1	97.112	6.5494	3.8	2	3	2	0.889	0.989	0.925	0.874	0.984	1.14	1.045	1.171	1.18	0.0146579
O54991	Contactin-associated protein 1 OS=Mus musculus OX=10090 GN=Cntnap1	Cntnap1	156.31	49.862	10.4	12	16	12	1.06	0.974	1.006	1.46	0.887	0.91	0.784	1.015	0.799	0.091839
O54992	MAP kinase-activated protein kinase 5 OS=Mus musculus OX=10090 GN=Mapkapk5	Mapkapk5	54.152	1.8021	1.7	1	1	1
O55003	BCL2/adenovirus E1B 19 kDa protein-interacting protein 3 OS=Mus musculus OX=10090 GN=Bnip3	Bnip3	20.978	6.1255	15.5	2	2	2
O55013	Trafficking protein particle complex subunit 3 OS=Mus musculus OX=10090 GN=Trappc3	Trappc3	20.302	20.558	24.4	5	7	5	1.036	1.004	0.991	0.95	1.02	1.039	1.02	0.97	1.017	0.4898
O55017	Voltage-dependent N-type calcium channel subunit alpha-1B OS=Mus musculus OX=10090 GN=Cacna1b	Cacna1b	261.48	41.855	5.6	11	12	11	1.051	0.976	1.002	0.962	1.016	0.989	0.98	1.011	1.001	0.93854
O55022	Membrane-associated progesterone receptor component 1 OS=Mus musculus OX=10090 GN=Pgrmc1	Pgrmc1	21.694	26.763	25.6	8	18	7	1.055	1.016	0.966	1.033	0.978	1.009	0.998	0.997	0.978	0.32314
O55023	Inositol monophosphatase 1 OS=Mus musculus OX=10090 GN=Impa1	Impa1	30.436	113.18	44	13	31	13	0.998	0.983	0.995	0.979	0.986	1.04	1.034	0.999	1.026	0.11154
O55026	Ectonucleoside triphosphate diphosphohydrolase 2 OS=Mus musculus OX=10090 GN=Entpd2	Entpd2	54.319	34.684	13.1	6	9	6	1.018	1.006	1.049	1.08	0.952	0.944	1.002	0.955	0.928	0.011499
O55028	[3-methyl-2-oxobutanoate dehydrogenase [lipoamide]] kinase, mitochondrial OS=Mus musculus OX=10090 GN=Bckdk	Bckdk	46.587	5.8714	6.8	3	3	3	0.941	1.071	0.926	0.925	1.115	0.959	0.991	1.085	1.074	0.20482
O55029	Coatomer subunit beta' OS=Mus musculus OX=10090 GN=Copb2	Copb2	102.45	251.27	36.5	32	50	32	1.03	1	1.031	1.015	0.991	0.991	0.989	0.971	0.967	0.0087562
O55033	Cytoplasmic protein NCK2 OS=Mus musculus OX=10090 GN=Nck2	Nck2	42.879	59.187	28.9	9	14	9	0.976	1.048	1.016	0.911	0.97	1.074	1.067	0.94	1.025	0.60526
O55042	Alpha-synuclein OS=Mus musculus OX=10090 GN=Snca	Snca	14.485	101.22	58.6	9	24	6	0.987	1.032	1.066	0.921	1.015	0.95	1.05	0.984	0.998	0.98108
O55047	Serine/threonine-protein kinase tousled-like 2 OS=Mus musculus OX=10090 GN=Tlk2	Tlk2	82.26	21.083	7.5	4	4	4	0.916	0.989	0.959	1.054	1.087	1.038	1.078	0.901	1.047	0.42572
O55057	Retinal rod rhodopsin-sensitive cGMP 3',5'-cyclic phosphodiesterase subunit delta OS=Mus musculus OX=10090 GN=Pde6d	Pde6d	17.348	23.334	28.7	3	4	3	1.075	1.042	0.956	0.998	0.989	1.015	0.947	1.059	0.985	0.68162
O55060	Thiopurine S-methyltransferase OS=Mus musculus OX=10090 GN=Tpmt	Tpmt	27.585	12.922	19.2	5	6	5	1.06	0.981	1.016	1.033	0.96	0.976	0.95	0.928	0.933	0.0114008
O55074	A-kinase anchor protein 7 isoform alpha OS=Mus musculus OX=10090 GN=Akap7	Akap7	9.169	16.396	25.9	3	5	3	0.962	0.973	1.117	0.926	0.945	1.038	0.998	1.05	1.013	0.76278
O55091	Protein IMPACT OS=Mus musculus OX=10090 GN=Impact	Impact	36.276	143.93	32.7	7	12	7	0.944	1.01	0.954	1.09	1.01	1.05	0.95	1.037	1.012	0.75328
O55100	Synaptogyrin-1 OS=Mus musculus OX=10090 GN=Syngr1	Syngr1	25.652	3.5055	5.1	1	2	1
O55102	Biogenesis of lysosome-related organelles complex 1 subunit 1 OS=Mus musculus OX=10090 GN=Bloc1s1	Bloc1s1	14.281	4.9786	14.4	2	2	2	0.897	0.817	0.952	0.852	1.203	1.035	1.075	1.165	1.273	0.0023983
O55106	Striatin OS=Mus musculus OX=10090 GN=Strn	Strn	85.965	141.49	32.8	20	26	19	1.014	1.017	1.036	0.968	1.001	0.948	0.999	1.009	0.981	0.37354
O55125	Protein NipSnap homolog 1 OS=Mus musculus OX=10090 GN=Nipsnap1	Nipsnap1	33.363	45.414	21.1	6	18	6	1.007	0.995	0.966	0.979	1.026	1.008	1.016	1.024	1.032	0.0188976
O55126	Protein NipSnap homolog 2 OS=Mus musculus OX=10090 GN=Nipsnap2	Nipsnap2	32.932	39.283	28.5	9	14	9	0.987	1.003	0.993	1.019	1.022	0.971	0.984	0.991	0.992	0.5279
O55128	Histone deacetylase complex subunit SAP18 OS=Mus musculus OX=10090 GN=Sap18	Sap18	17.595	25.576	43.8	9	16	9	0.986	0.976	0.973	0.97	1.019	1.058	1.092	0.962	1.058	0.13822
O55131	Septin-7 OS=Mus musculus OX=10090 GN=Sept7	Sept7	50.549	235.27	52.8	23	71	22	1.027	1.001	0.994	1.034	0.945	0.99	1.003	1.022	0.976	0.25516
O55135	Eukaryotic translation initiation factor 6 OS=Mus musculus OX=10090 GN=Eif6	Eif6	26.511	47.803	40.4	7	11	7	0.966	0.978	1.058	0.977	1.036	1.109	1.049	0.917	1.033	0.5193
O55137	Acyl-coenzyme A thioesterase 1 OS=Mus musculus OX=10090 GN=Acot1	Acot1	46.135	116.97	37.2	14	25	6	1.038	1.05	0.976	1.146	0.96	0.959	0.939	0.959	0.907	0.063683
O55142	60S ribosomal protein L35a OS=Mus musculus OX=10090 GN=Rpl35a	Rpl35a	12.554	13.513	44.5	6	12	6	1.059	1.06	1.041	0.946	0.925	0.97	0.987	0.953	0.934	0.068924
O55143	Sarcoplasmic/endoplasmic reticulum calcium ATPase 2 OS=Mus musculus OX=10090 GN=Atp2a2	Atp2a2	114.86	323.31	36.7	38	103	38	1.015	1.02	1.038	1.027	1.007	0.954	0.966	0.981	0.953	0.0088045
O55176	E3 ubiquitin-protein ligase Praja-1 OS=Mus musculus OX=10090 GN=Pja1	Pja1	63.905	12.916	6.9	3	3	2	1.055	0.949	0.817	1.07	0.954	1.13	1.151	0.906	1.064	0.49678
O55201	Transcription elongation factor SPT5 OS=Mus musculus OX=10090 GN=Supt5h	Supt5h	120.66	53.081	11.1	12	14	12	0.993	0.985	1.018	1.011	0.991	0.991	1.017	0.994	0.997	0.73778
O55222	Integrin-linked protein kinase OS=Mus musculus OX=10090 GN=Ilk	Ilk	51.373	56.135	30.1	14	19	14	1.015	1.009	1	1.019	0.958	0.982	0.993	1.008	0.975	0.06644
O55229	Choline/ethanolamine kinase OS=Mus musculus OX=10090 GN=Chkb	Chkb	45.126	39.656	25.6	9	10	9	0.915	0.95	1.053	1.042	1.008	1.044	1.035	1.004	1.033	0.3773
O55234	Proteasome subunit beta type-5 OS=Mus musculus OX=10090 GN=Psmb5	Psmb5	28.532	101.46	43.2	12	23	12	1.025	0.955	0.98	0.99	1.023	1.048	1.015	0.973	1.028	0.24896
O55236	mRNA-capping enzyme OS=Mus musculus OX=10090 GN=Rngtt	Rngtt	68.683	6.9413	3	2	2	2
O55242	Sigma non-opioid intracellular receptor 1 OS=Mus musculus OX=10090 GN=Sigmar1	Sigmar1	25.25	3.0054	5.8	1	1	1
O70133	ATP-dependent RNA helicase A OS=Mus musculus OX=10090 GN=Dhx9	Dhx9	149.47	228.13	26.8	34	70	34	1.009	0.986	0.977	0.953	1.029	1.027	1.031	0.997	1.041	0.031199
O70152	Dolichol-phosphate mannosyltransferase subunit 1 OS=Mus musculus OX=10090 GN=Dpm1	Dpm1	29.174	32.193	34.6	8	11	8	1.046	0.939	0.973	0.935	0.965	0.987	1.044	0.991	1.024	0.45772
O70161	Phosphatidylinositol 4-phosphate 5-kinase type-1 gamma OS=Mus musculus OX=10090 GN=Pip5k1c	Pip5k1c	72.407	107.21	18.3	9	15	8	1.011	1.014	1.002	1.034	1.011	0.968	0.994	1.029	0.985	0.34912
O70166	Stathmin-3 OS=Mus musculus OX=10090 GN=Stmn3	Stmn3	20.954	34.252	45.6	10	18	10	1.016	1.044	1.027	0.95	1.006	1.026	0.982	0.979	0.989	0.67022
O70172	Phosphatidylinositol 5-phosphate 4-kinase type-2 alpha OS=Mus musculus OX=10090 GN=Pip4k2a	Pip4k2a	46.151	56.706	25.4	10	17	5	1.027	1.008	0.965	0.997	0.989	0.99	1.031	1.013	1.007	0.70254
O70194	Eukaryotic translation initiation factor 3 subunit D OS=Mus musculus OX=10090 GN=Eif3d	Eif3d	63.988	70.484	31.6	12	22	12	1.029	1	1.045	1.004	1.043	1	0.962	0.986	0.979	0.3144
O70228	Probable phospholipid-transporting ATPase IIA OS=Mus musculus OX=10090 GN=Atp9a	Atp9a	118.61	135.94	23.6	24	34	19	1.009	1.032	0.985	0.976	1.006	0.999	0.974	0.992	0.992	0.61478
O70250	Phosphoglycerate mutase 2 OS=Mus musculus OX=10090 GN=Pgam2	Pgam2	28.827	5.7934	17.4	5	22	1
O70251	Elongation factor 1-beta OS=Mus musculus OX=10090 GN=Eef1b	Eef1b	24.693	93.667	36	7	29	6	1.056	1.01	0.991	1.009	0.967	0.991	1.002	0.986	0.97	0.101997
O70252	Heme oxygenase 2 OS=Mus musculus OX=10090 GN=Hmox2	Hmox2	35.738	104.71	50.8	13	24	13	0.994	0.992	1.011	1.041	0.967	1.01	1.003	1.008	0.988	0.44296
O70274	Protein tyrosine phosphatase type IVA 2 OS=Mus musculus OX=10090 GN=Ptp4a2	Ptp4a2	19.127	27.365	31.7	6	6	4	1.002	0.936	0.983	1.063	1.036	1.084	0.989	0.923	1.012	0.80334
O70293	G protein-coupled receptor kinase 6 OS=Mus musculus OX=10090 GN=Grk6	Grk6	65.978	38.017	14.6	7	7	7	0.978	1.017	0.948	0.914	1.077	1.029	1.099	0.997	1.089	0.035097
O70305	Ataxin-2 OS=Mus musculus OX=10090 GN=Atxn2	Atxn2	136.48	131.46	16.5	20	30	18	1.05	1.002	1.004	1.048	0.986	1.042	0.958	0.952	0.96	0.137656
O70310	Glycylpeptide N-tetradecanoyltransferase 1 OS=Mus musculus OX=10090 GN=Nmt1	Nmt1	56.888	79.206	26.4	12	25	9	1.027	1.043	0.985	1.008	0.986	0.981	0.988	1.017	0.978	0.178217
O70311	Glycylpeptide N-tetradecanoyltransferase 2 OS=Mus musculus OX=10090 GN=Nmt2	Nmt2	60.484	80.151	29.1	13	21	10	0.983	0.964	0.988	1.009	0.991	1.04	0.94	0.983	1.003	0.93206
O70318	Band 4.1-like protein 2 OS=Mus musculus OX=10090 GN=Epb41l2	Epb41l2	109.94	172.86	34.7	29	42	26	1.056	1.001	0.993	1.175	0.965	0.895	0.905	1.012	0.894	0.061096
O70324	Monocarboxylate transporter 8 OS=Mus musculus OX=10090 GN=Slc16a2	Slc16a2	60.024	2.734	4.2	1	1	1
O70325	Phospholipid hydroperoxide glutathione peroxidase OS=Mus musculus OX=10090 GN=Gpx4	Gpx4	22.228	36.278	43.1	8	14	8	0.945	1.053	1.026	1.005	1.013	0.989	0.997	1.01	0.995	0.86988
O70340	Neuronal pentraxin-2 OS=Mus musculus OX=10090 GN=Nptx2	Nptx2	47.136	1.577	4.2	2	2	2
O70354	Carbonic anhydrase-related protein 11 OS=Mus musculus OX=10090 GN=Ca11	Ca11	36.051	4.349	3.4	1	1	1	1.12	0.972	0.984	0.988	1.135	0.906	0.968	0.932	0.97	0.60462
O70370	Cathepsin S OS=Mus musculus OX=10090 GN=Ctss	Ctss	38.474	11.086	5.9	2	2	2	0.7	0.669	0.747	0.715	1.053	1.32	1.519	1.298	1.833	0.00027679
O70378	ER membrane protein complex subunit 8 OS=Mus musculus OX=10090 GN=Emc8	Emc8	23.348	89.098	61.4	11	17	11	0.989	0.999	1.019	1.032	0.974	1.041	1.016	0.997	0.997	0.87118
O70400	PDZ and LIM domain protein 1 OS=Mus musculus OX=10090 GN=Pdlim1	Pdlim1	35.774	2.6098	4	1	1	1
O70401	Tetraspanin-6 OS=Mus musculus OX=10090 GN=Tspan6	Tspan6	27.333	18.877	17.6	4	6	4	1.089	1.017	0.96	1.011	0.956	1.045	0.916	1.022	0.966	0.41602
O70421	Frizzled-1 OS=Mus musculus OX=10090 GN=Fzd1	Fzd1	71.126	3.3564	1.9	1	1	1	0.961	0.888	1.102	0.968	0.981	1.272	0.871	0.967	1.044	0.71
O70433	Four and a half LIM domains protein 2 OS=Mus musculus OX=10090 GN=Fhl2	Fhl2	32.072	7.4911	3.6	1	1	1
O70435	Proteasome subunit alpha type-3 OS=Mus musculus OX=10090 GN=Psma3	Psma3	28.405	45.357	37.6	11	28	11	0.994	0.972	1.001	0.989	0.991	1.024	1.024	1.001	1.021	0.089738
O70439	Syntaxin-7 OS=Mus musculus OX=10090 GN=Stx7	Stx7	29.82	80.946	35.6	8	12	8	0.968	0.965	0.982	0.977	1.045	1.023	1.021	0.959	1.04	0.133124
O70443	Guanine nucleotide-binding protein G(z) subunit alpha OS=Mus musculus OX=10090 GN=Gnaz	Gnaz	40.849	87.08	42.8	13	28	12	0.993	1.013	0.996	0.973	0.997	0.985	1.038	1.008	1.013	0.38116
O70451	Monocarboxylate transporter 2 OS=Mus musculus OX=10090 GN=Slc16a7	Slc16a7	52.603	7.0491	5.2	3	4	3	1.036	0.982	1.045	0.812	1.054	0.954	1.105	1.017	1.066	0.35018
O70456	14-3-3 protein sigma OS=Mus musculus OX=10090 GN=Sfn	Sfn	27.706	2.6876	16.1	5	51	1	1.033	0.948	1.003	0.995	1.03	0.973	1.07	0.991	1.021	0.47736
O70475	UDP-glucose 6-dehydrogenase OS=Mus musculus OX=10090 GN=Ugdh	Ugdh	54.831	28.475	24.5	10	11	10	1.032	1.054	1.081	1.028	0.992	0.944	0.895	0.995	0.912	0.0149443
O70480	Vesicle-associated membrane protein 4 OS=Mus musculus OX=10090 GN=Vamp4	Vamp4	16.353	38.698	18.4	2	2	2	1.067	1.184	1.15	1.156	0.808	0.887	0.808	0.961	0.76	0.00113845
O70481	E3 ubiquitin-protein ligase UBR1 OS=Mus musculus OX=10090 GN=Ubr1	Ubr1	200.24	71.577	5.9	9	9	9	1.034	1.014	1.003	0.933	1.029	1.034	1.002	0.948	1.007	0.81318
O70492	Sorting nexin-3 OS=Mus musculus OX=10090 GN=Snx3	Snx3	18.757	22.738	32.7	8	13	6	0.989	0.986	0.95	0.93	1.034	1.021	1.022	1.036	1.067	0.0054995
O70493	Sorting nexin-12 OS=Mus musculus OX=10090 GN=Snx12	Snx12	19.116	21.337	39.4	8	14	6	1.026	0.99	0.975	0.999	0.986	0.986	1.02	1.013	1.004	0.7937
O70503	Very-long-chain 3-oxoacyl-CoA reductase OS=Mus musculus OX=10090 GN=Hsd17b12	Hsd17b12	34.741	29.738	24.4	8	13	8	1.031	1.036	1.021	1.031	0.967	0.985	0.975	0.982	0.949	5.5585e-05
O70507	Potassium/sodium hyperpolarization-activated cyclic nucleotide-gated channel 4 OS=Mus musculus OX=10090 GN=Hcn4	Hcn4	127.41	6.2499	3.4	3	5	2	1.048	0.987	0.972	0.97	1.058	1.067	0.848	1.058	1.014	0.87784
O70551	SRSF protein kinase 1 OS=Mus musculus OX=10090 GN=Srpk1	Srpk1	73.088	28.797	13	8	10	6	1.108	1.227	1.103	1.096	0.888	0.913	0.858	0.958	0.798	0.00071898
O70566	Protein diaphanous homolog 2 OS=Mus musculus OX=10090 GN=Diaph2	Diaph2	124.87	11.456	5.4	7	8	7	0.969	0.999	1.05	1.006	1.022	0.953	0.984	1.052	0.997	0.9012
O70572	Sphingomyelin phosphodiesterase 2 OS=Mus musculus OX=10090 GN=Smpd2	Smpd2	47.466	2.2733	1.9	1	1	1	1.023	1.135	1.056	1.037	0.926	0.927	0.953	0.965	0.887	0.0032982
O70585	Dystrobrevin beta OS=Mus musculus OX=10090 GN=Dtnb	Dtnb	74.398	3.7816	6.8	5	5	1	0.95	1.063	0.981	1.115	1.059	0.948	0.942	0.96	0.951	0.32532
O70589	Peripheral plasma membrane protein CASK OS=Mus musculus OX=10090 GN=Cask	Cask	105.11	143.97	31.5	27	49	27	1.008	0.995	0.994	1.04	1.008	0.989	0.946	1.005	0.978	0.2601
O70591	Prefoldin subunit 2 OS=Mus musculus OX=10090 GN=Pfdn2	Pfdn2	16.534	24.941	36.4	5	8	5	0.945	1.023	1.046	1.001	0.944	1.104	0.961	1.037	1.008	0.88386
O70622	Reticulon-2 OS=Mus musculus OX=10090 GN=Rtn2	Rtn2	51.346	3.4067	3.4	2	2	2
O70628	High affinity cGMP-specific 3',5'-cyclic phosphodiesterase 9A OS=Mus musculus OX=10090 GN=Pde9a	Pde9a	61.635	16.935	5.2	2	2	2	1.091	0.89	1.127	1.005	0.841	1.07	1.026	0.962	0.948	0.49976
O88196	E3 ubiquitin-protein ligase TTC3 OS=Mus musculus OX=10090 GN=Ttc3	Ttc3	223.93	68.183	9.2	15	20	15	0.932	1.028	0.911	0.91	0.993	1.102	1.032	1.032	1.1	0.037803
O88271	Craniofacial development protein 1 OS=Mus musculus OX=10090 GN=Cfdp1	Cfdp1	32.921	20.85	24.4	7	8	7	1.054	0.989	1.067	1.05	0.975	0.979	0.932	1.066	0.95	0.163277
O88286	Protein Wiz OS=Mus musculus OX=10090 GN=Wiz	Wiz	184.29	2.9326	1.1	2	2	2
O88291	DBIRD complex subunit ZNF326 OS=Mus musculus OX=10090 GN=Znf326	Znf326	65.225	110.81	23.4	15	20	15	0.983	1.035	1.003	0.945	1.013	1.024	0.992	0.977	1.01	0.6493
O88307	Sortilin-related receptor OS=Mus musculus OX=10090 GN=Sorl1	Sorl1	247.08	35.06	6.9	15	15	15	1.015	0.989	1.003	1.16	0.985	0.927	0.936	1.01	0.926	0.123624
O88319	Neurotensin receptor type 1 OS=Mus musculus OX=10090 GN=Ntsr1	Ntsr1	47.216	1.4378	2.1	1	1	1
O88322	Nidogen-2 OS=Mus musculus OX=10090 GN=Nid2	Nid2	153.91	29.121	8.8	11	12	10	1.033	1	1.014	0.994	1.021	0.949	0.984	0.956	0.968	0.12522
O88342	WD repeat-containing protein 1 OS=Mus musculus OX=10090 GN=Wdr1	Wdr1	66.406	323.31	46.7	27	63	27	0.99	0.998	1.014	0.998	0.99	0.986	0.989	1.003	0.992	0.2493
O88343	Electrogenic sodium bicarbonate cotransporter 1 OS=Mus musculus OX=10090 GN=Slc4a4	Slc4a4	121.48	122.39	18.8	19	28	18	0.94	0.976	0.914	1.074	1.078	0.99	0.98	0.991	1.035	0.43086
O88351	Inhibitor of nuclear factor kappa-B kinase subunit beta OS=Mus musculus OX=10090 GN=Ikbkb	Ikbkb	86.689	21.226	8.2	6	7	6	1.046	0.953	1.042	0.934	1.006	0.919	1.01	1.068	1.007	0.87764
O88384	Vesicle transport through interaction with t-SNAREs homolog 1B OS=Mus musculus OX=10090 GN=Vti1b	Vti1b	26.713	14.697	17.7	4	7	4	1.037	1.09	1.047	0.948	0.949	0.926	0.866	1.146	0.943	0.38266
O88427	Voltage-dependent T-type calcium channel subunit alpha-1H OS=Mus musculus OX=10090 GN=Cacna1h	Cacna1h	262.03	2.0575	1	2	2	2	1.079	1	0.985	1.054	1.005	0.986	0.999	0.909	0.947	0.135363
O88428	Bifunctional 3'-phosphoadenosine 5'-phosphosulfate synthase 2 OS=Mus musculus OX=10090 GN=Papss2	Papss2	70.35	3.7932	5.5	3	4	2
O88441	Metaxin-2 OS=Mus musculus OX=10090 GN=Mtx2	Mtx2	29.758	40.529	24	7	15	7	0.99	0.996	0.987	0.952	0.999	1.079	1.054	0.979	1.047	0.115819
O88444	Adenylate cyclase type 1 OS=Mus musculus OX=10090 GN=Adcy1	Adcy1	123.37	34.58	12.2	10	12	10	0.984	1.041	0.935	0.889	0.906	1.08	1.112	1.062	1.081	0.22956
O88447	Kinesin light chain 1 OS=Mus musculus OX=10090 GN=Klc1	Klc1	61.449	175.42	47.1	27	58	19	1	1.032	1.008	0.952	1.042	0.967	1.051	0.927	0.999	0.9517
O88448	Kinesin light chain 2 OS=Mus musculus OX=10090 GN=Klc2	Klc2	66.662	136.96	38.7	23	37	18	0.972	1.023	1.004	0.986	1.024	0.996	0.983	1.007	1.006	0.6687
O88455	7-dehydrocholesterol reductase OS=Mus musculus OX=10090 GN=Dhcr7	Dhcr7	53.918	30.726	6.4	3	4	3	1.055	1.08	1.024	1.035	0.994	0.933	0.94	0.966	0.914	0.0028352
O88456	Calpain small subunit 1 OS=Mus musculus OX=10090 GN=Capns1	Capns1	28.463	26.901	23.4	6	10	6	1.022	1.078	1.037	1.072	1.018	0.964	0.922	0.963	0.919	0.012196
O88477	Insulin-like growth factor 2 mRNA-binding protein 1 OS=Mus musculus OX=10090 GN=Igf2bp1	Igf2bp1	63.45	2.241	3.1	2	2	1
O88485	Cytoplasmic dynein 1 intermediate chain 1 OS=Mus musculus OX=10090 GN=Dync1i1	Dync1i1	70.724	90.486	21.7	10	12	10	0.982	0.922	0.974	0.919	1.029	1.034	1.069	0.995	1.087	0.0107649
O88487	Cytoplasmic dynein 1 intermediate chain 2 OS=Mus musculus OX=10090 GN=Dync1i2	Dync1i2	68.393	42.942	15.5	7	9	7	0.978	1.04	0.979	1.046	1.023	1.014	0.942	1	0.984	0.56482
O88491	Histone-lysine N-methyltransferase, H3 lysine-36 and H4 lysine-20 specific OS=Mus musculus OX=10090 GN=Nsd1	Nsd1	284.08	4.392	1.3	3	3	3	0.901	1.013	1.002	1.015	1.001	0.953	1.061	1.072	1.04	0.3632
O88507	Ciliary neurotrophic factor receptor subunit alpha OS=Mus musculus OX=10090 GN=Cntfr	Cntfr	40.801	27.181	12.6	5	9	5	0.915	1.067	1.009	0.981	1.035	0.967	0.995	0.996	1.005	0.8581
O88508	DNA (cytosine-5)-methyltransferase 3A OS=Mus musculus OX=10090 GN=Dnmt3a	Dnmt3a	101.67	145.46	34.6	29	47	29	0.994	0.989	1.001	0.956	1.014	1.046	1.022	1.01	1.039	0.025764
O88520	Leucine-rich repeat protein SHOC-2 OS=Mus musculus OX=10090 GN=Shoc2	Shoc2	64.892	11.589	8.6	5	5	5	0.995	0.942	0.969	1.05	1.035	0.954	1.033	1.034	1.025	0.44288
O88531	Palmitoyl-protein thioesterase 1 OS=Mus musculus OX=10090 GN=Ppt1	Ppt1	34.49	47.596	20.6	5	7	5	0.928	0.994	0.955	1.012	1.002	1.097	1.034	0.96	1.052	0.190256
O88532	Zinc finger RNA-binding protein OS=Mus musculus OX=10090 GN=Zfr	Zfr	116.86	185.79	27.4	21	28	21	1.046	1.007	1.01	0.942	1	0.995	1.011	0.998	1	0.98526
O88533	Aromatic-L-amino-acid decarboxylase OS=Mus musculus OX=10090 GN=Ddc	Ddc	53.873	22.654	18.3	7	8	7	0.89	0.986	0.924	1.226	0.996	1.025	0.969	1.021	0.996	0.95988
O88543	COP9 signalosome complex subunit 3 OS=Mus musculus OX=10090 GN=Cops3	Cops3	47.832	79.167	31.2	10	26	10	1.022	1.032	0.995	0.983	0.995	0.994	0.997	0.949	0.976	0.189257
O88544	COP9 signalosome complex subunit 4 OS=Mus musculus OX=10090 GN=Cops4	Cops4	46.284	144.44	56.9	19	33	19	0.972	1.026	1.008	1.071	0.968	0.984	1.017	1.045	0.985	0.58108
O88545	COP9 signalosome complex subunit 6 OS=Mus musculus OX=10090 GN=Cops6	Cops6	35.88	90.266	37.7	10	15	10	0.959	0.999	0.973	1.025	0.961	1.002	1.032	0.985	1.006	0.78334
O88559	Menin OS=Mus musculus OX=10090 GN=Men1	Men1	67.5	3.1228	4.4	2	2	2	0.882	1.021	0.959	0.927	0.936	1.266	1.072	0.968	1.12	0.1997
O88561	Long-chain fatty acid transport protein 3 OS=Mus musculus OX=10090 GN=Slc27a3	Slc27a3	72.964	6.7959	5.5	4	4	4
O88569	Heterogeneous nuclear ribonucleoproteins A2/B1 OS=Mus musculus OX=10090 GN=Hnrnpa2b1	Hnrnpa2b1	37.402	287.26	68	22	96	22	1	0.953	0.984	0.995	0.999	1.037	1.058	0.98	1.036	0.136456
O88587	Catechol O-methyltransferase OS=Mus musculus OX=10090 GN=Comt	Comt	29.486	50.181	35.5	9	13	9	1.012	1.009	0.974	1.009	1.01	0.978	0.989	0.985	0.99	0.3941
O88593	Peptidoglycan recognition protein 1 OS=Mus musculus OX=10090 GN=Pglyrp1	Pglyrp1	20.489	2.8041	4.9	1	1	1	1.068	1.056	1.077	1.077	0.878	0.92	0.844	1.091	0.873	0.088542
O88597	Beclin-1 OS=Mus musculus OX=10090 GN=Becn1	Becn1	51.588	34.334	12.5	5	7	5	0.978	0.914	0.981	0.966	1.16	1.06	1.041	0.848	1.07	0.43038
O88602	Voltage-dependent calcium channel gamma-2 subunit OS=Mus musculus OX=10090 GN=Cacng2	Cacng2	35.894	11.8	14.6	4	4	3
O88622	Poly(ADP-ribose) glycohydrolase OS=Mus musculus OX=10090 GN=Parg	Parg	109.32	28.523	7.8	7	7	7	0.57	0.955	0.994	1.082	0.956	1.276	0.964	1.228	1.229	0.2186
O88630	Golgi SNAP receptor complex member 1 OS=Mus musculus OX=10090 GN=Gosr1	Gosr1	28.489	22.171	14	3	3	3	1.036	1.069	1.077	0.932	0.937	0.919	0.935	1.103	0.947	0.34076
O88643	Serine/threonine-protein kinase PAK 1 OS=Mus musculus OX=10090 GN=Pak1	Pak1	60.736	212.01	43.7	18	52	11	0.983	0.955	1.014	1.036	0.956	1.005	0.998	1.033	1.001	0.96508
O88653	Ragulator complex protein LAMTOR3 OS=Mus musculus OX=10090 GN=Lamtor3	Lamtor3	13.553	8.6991	18.5	2	3	2	0.994	1.1	1.023	0.979	0.975	0.966	0.915	1.037	0.95	0.21246
O88668	Protein CREG1 OS=Mus musculus OX=10090 GN=Creg1	Creg1	24.452	3.7269	5	1	1	1	1.112	0.908	0.923	0.969	1.042	1.086	0.951	1.019	1.048	0.40108
O88685	26S proteasome regulatory subunit 6A OS=Mus musculus OX=10090 GN=Psmc3	Psmc3	49.548	282.41	69.5	28	73	28	0.978	0.998	0.986	0.991	1.019	1.022	0.997	1.021	1.027	0.0109193
O88693	Ceramide glucosyltransferase OS=Mus musculus OX=10090 GN=Ugcg	Ugcg	44.838	2.7338	3.3	1	1	1
O88696	ATP-dependent Clp protease proteolytic subunit, mitochondrial OS=Mus musculus OX=10090 GN=Clpp	Clpp	29.8	85.479	31.6	7	12	7	1.001	1.072	0.976	0.998	1.013	0.968	0.963	1.021	0.98	0.45538
O88703	Potassium/sodium hyperpolarization-activated cyclic nucleotide-gated channel 2 OS=Mus musculus OX=10090 GN=Hcn2	Hcn2	94.721	11.657	6.1	5	6	4	0.89	0.949	1.002	1.097	1.076	0.94	0.955	1.101	1.034	0.59164
O88704	Potassium/sodium hyperpolarization-activated cyclic nucleotide-gated channel 1 OS=Mus musculus OX=10090 GN=Hcn1	Hcn1	102.43	9.7067	5.6	4	5	3
O88705	Potassium/sodium hyperpolarization-activated cyclic nucleotide-gated channel 3 OS=Mus musculus OX=10090 GN=Hcn3	Hcn3	86.64	8.9303	6.8	5	5	5	0.941	1.066	0.973	0.996	1.051	1.022	0.987	0.984	1.017	0.58594
O88712	C-terminal-binding protein 1 OS=Mus musculus OX=10090 GN=Ctbp1	Ctbp1	47.744	64.193	18.8	8	18	4	0.903	1.044	1.008	1.057	0.988	0.965	0.978	1.028	0.987	0.77062
O88736	3-keto-steroid reductase OS=Mus musculus OX=10090 GN=Hsd17b7	Hsd17b7	37.316	11.048	9.9	3	3	3
O88737	Protein bassoon OS=Mus musculus OX=10090 GN=Bsn	Bsn	418.84	323.01	17.7	53	60	53	0.991	0.994	1.012	1.017	1.07	0.984	0.99	1.002	1.008	0.72724
O88738	Baculoviral IAP repeat-containing protein 6 OS=Mus musculus OX=10090 GN=Birc6	Birc6	532.16	249.82	10.1	41	51	41	1.067	1.054	1.004	0.984	0.978	1.002	0.995	0.998	0.967	0.149197
O88741	Ganglioside-induced differentiation-associated protein 1 OS=Mus musculus OX=10090 GN=Gdap1	Gdap1	41.31	59.76	25.1	12	18	12	1.005	1.012	1.038	0.995	1.01	1.017	0.956	1.021	0.989	0.53774
O88746	Target of Myb protein 1 OS=Mus musculus OX=10090 GN=Tom1	Tom1	54.325	75.13	22.4	9	13	9	1.051	1.082	0.977	1.038	1.028	0.899	0.951	1.076	0.953	0.31656
O88796	Ribonuclease P protein subunit p30 OS=Mus musculus OX=10090 GN=Rpp30	Rpp30	29.473	4.7102	9	2	2	2	1.02	1.201	1.019	1.057	0.794	1.14	0.905	0.902	0.871	0.138141
O88809	Neuronal migration protein doublecortin OS=Mus musculus OX=10090 GN=Dcx	Dcx	40.612	184.11	57.7	18	39	15	0.977	0.912	0.926	0.816	1.022	1.16	1.174	0.98	1.194	0.024205
O88811	Signal transducing adapter molecule 2 OS=Mus musculus OX=10090 GN=Stam2	Stam2	57.454	25.546	11.1	6	7	6	1.04	1.021	0.981	0.967	0.977	0.982	0.993	1.001	0.986	0.47174
O88829	Lactosylceramide alpha-2,3-sialyltransferase OS=Mus musculus OX=10090 GN=St3gal5	St3gal5	47.359	1.7416	2.4	1	1	1
O88834	SH2 domain-containing adapter protein D OS=Mus musculus OX=10090 GN=Shd	Shd	38.481	3.3089	5.2	2	2	2	0.962	0.954	0.839	0.719	1.525	1.152	1.103	0.75	1.304	0.184897
O88839	Disintegrin and metalloproteinase domain-containing protein 15 OS=Mus musculus OX=10090 GN=Adam15	Adam15	92.663	6.4247	3.2	2	3	2	0.982	0.754	0.943	1.112	0.979	0.917	1.048	1.266	1.111	0.3552
O88844	Isocitrate dehydrogenase [NADP] cytoplasmic OS=Mus musculus OX=10090 GN=Idh1	Idh1	46.674	227.9	61.8	28	104	27	0.992	0.988	0.982	0.933	1.009	1.065	1.03	1.008	1.056	0.030323
O88845	A-kinase anchor protein 10, mitochondrial OS=Mus musculus OX=10090 GN=Akap10	Akap10	73.631	30.076	14.2	7	7	7	1.058	1.102	1.023	1.042	0.916	0.927	0.916	0.979	0.885	0.00157561
O88848	ADP-ribosylation factor-like protein 6 OS=Mus musculus OX=10090 GN=Arl6	Arl6	20.959	22.178	24.7	4	7	4	0.918	1.059	1.031	0.947	1.005	1.048	0.984	0.953	1.009	0.80902
O88851	Putative hydrolase RBBP9 OS=Mus musculus OX=10090 GN=Rbbp9	Rbbp9	20.911	70.383	56.5	8	13	8	0.978	0.94	0.99	1.009	1.019	0.986	1.031	0.983	1.026	0.22542
O88874	Cyclin-K OS=Mus musculus OX=10090 GN=Ccnk	Ccnk	61.363	29.136	3.1	1	2	1	0.848	0.938	0.922	1.091	0.991	1.355	1.007	0.883	1.115	0.37864
O88878	AN1-type zinc finger protein 5 OS=Mus musculus OX=10090 GN=Zfand5	Zfand5	23.058	7.3465	8.5	1	1	1	1.134	0.925	1.14	0.943	0.956	0.943	1.028	0.934	0.932	0.31966
O88888	Amyloid-beta A4 precursor protein-binding family A member 3 OS=Mus musculus OX=10090 GN=Apba3	Apba3	60.717	1.8158	1.6	1	1	1
O88895	Histone deacetylase 3 OS=Mus musculus OX=10090 GN=Hdac3	Hdac3	48.364	9.66	5.9	2	2	2	1.021	0.924	0.929	1.019	1.039	1.026	1.106	0.953	1.059	0.2138
O88910	MAGUK p55 subfamily member 3 OS=Mus musculus OX=10090 GN=Mpp3	Mpp3	64.4	63.331	24.6	13	16	13	0.979	0.99	0.93	1.055	0.97	1.042	1.007	1.039	1.026	0.42208
O88935	Synapsin-1 OS=Mus musculus OX=10090 GN=Syn1	Syn1	74.096	323.31	67	33	167	30	0.94	0.994	1.003	0.979	1.031	0.977	1.026	1.012	1.033	0.132201
O88952	Protein lin-7 homolog C OS=Mus musculus OX=10090 GN=Lin7c	Lin7c	21.834	24.775	21.8	4	7	3	1.029	1.018	0.939	1.008	1.038	0.969	0.99	1.034	1.009	0.73558
O88958	Glucosamine-6-phosphate isomerase 1 OS=Mus musculus OX=10090 GN=Gnpda1	Gnpda1	32.549	39.75	32.2	7	12	5	1.044	1.071	0.97	1.01	0.964	1.102	0.867	0.992	0.958	0.43118
O88967	ATP-dependent zinc metalloprotease YME1L1 OS=Mus musculus OX=10090 GN=Yme1l1	Yme1l1	80.027	21.316	10.8	7	7	7	0.934	1.074	1.107	0.982	0.923	0.963	0.963	0.98	0.935	0.163643
O88974	Histone-lysine N-methyltransferase SETDB1 OS=Mus musculus OX=10090 GN=Setdb1	Setdb1	144.55	9.7408	3.7	5	5	5
O88983	Syntaxin-8 OS=Mus musculus OX=10090 GN=Stx8	Stx8	26.925	11.608	14.4	3	4	3
O88986	2-amino-3-ketobutyrate coenzyme A ligase, mitochondrial OS=Mus musculus OX=10090 GN=Gcat	Gcat	44.93	17.26	12	4	4	4	0.869	0.976	1.058	1.102	1.089	0.941	1.008	0.969	1	0.9621
O88998	Noelin OS=Mus musculus OX=10090 GN=Olfm1	Olfm1	55.397	56.885	18.4	6	9	6	0.952	1.012	1.028	1.054	0.972	0.99	0.986	0.952	0.964	0.173036
O89001	Carboxypeptidase D OS=Mus musculus OX=10090 GN=Cpd	Cpd	152.4	95.088	15.2	19	26	19	1.05	1.013	1.072	0.976	0.976	0.904	0.98	0.994	0.937	0.072718
O89017	Legumain OS=Mus musculus OX=10090 GN=Lgmn	Lgmn	49.372	33.156	10.3	3	6	3	0.92	0.894	1.095	0.967	0.892	1.036	1.092	1.025	1.044	0.5154
O89026	Roundabout homolog 1 OS=Mus musculus OX=10090 GN=Robo1	Robo1	176.4	67.336	12.1	18	18	16	0.926	1.086	0.945	1.054	0.958	1.032	0.967	1.014	0.99	0.85676
O89029	Matrilin-4 OS=Mus musculus OX=10090 GN=Matn4	Matn4	68.918	52.364	18.1	9	12	9	0.956	1	0.967	1.098	0.971	0.956	1.015	0.989	0.978	0.5519
O89032	SH3 and PX domain-containing protein 2A OS=Mus musculus OX=10090 GN=Sh3pxd2a	Sh3pxd2a	124.2	1.9763	1.7	2	2	1
O89050	Muskelin OS=Mus musculus OX=10090 GN=Mkln1	Mkln1	84.877	20.821	10.7	6	6	6	1.035	0.985	0.966	1.007	0.875	0.937	1.09	1.123	1.008	0.96452
O89051	Integral membrane protein 2B OS=Mus musculus OX=10090 GN=Itm2b	Itm2b	30.26	23.115	30.1	6	10	6	1	1.039	0.971	1.05	1.008	0.959	1.021	0.964	0.973	0.30414
O89053	Coronin-1A OS=Mus musculus OX=10090 GN=Coro1a	Coro1a	50.989	85.83	31.9	17	39	16	1.002	0.999	0.998	0.988	1.001	1.008	1.035	1.007	1.016	0.095944
O89079	Coatomer subunit epsilon OS=Mus musculus OX=10090 GN=Cope	Cope	34.567	85.707	32.5	6	11	6	0.991	1.038	1.015	1.064	0.971	0.937	0.985	0.982	0.943	0.022299
O89084	cAMP-specific 3',5'-cyclic phosphodiesterase 4A OS=Mus musculus OX=10090 GN=Pde4a	Pde4a	93.557	16.873	8.1	5	6	2
O89086	RNA-binding protein 3 OS=Mus musculus OX=10090 GN=Rbm3	Rbm3	16.604	54.705	42.5	7	13	7	0.926	0.889	0.89	0.847	0.999	1.131	1.12	1.126	1.232	0.00102227
O89106	Bis(5'-adenosyl)-triphosphatase OS=Mus musculus OX=10090 GN=Fhit	Fhit	17.234	17.015	22	3	3	3	0.927	0.929	1.083	1.095	1.016	0.959	1.01	0.992	0.986	0.82214
O89110	Caspase-8 OS=Mus musculus OX=10090 GN=Casp8	Casp8	55.356	2.4566	2.3	1	1	1	0.956	1.02	1.034	1.275	1.007	0.904	0.802	1.016	0.87	0.150736
O89112	LanC-like protein 1 OS=Mus musculus OX=10090 GN=Lancl1	Lancl1	45.341	61.467	31.6	11	15	11	0.998	0.975	0.959	1.087	0.989	1.053	1.011	1.02	1.013	0.65876
O89114	DnaJ homolog subfamily B member 5 OS=Mus musculus OX=10090 GN=Dnajb5	Dnajb5	39.119	47.725	31	10	11	10	0.984	0.991	1.076	0.95	0.969	0.923	1.022	1.033	0.987	0.72708
O89116	Vesicle transport through interaction with t-SNAREs homolog 1A OS=Mus musculus OX=10090 GN=Vti1a	Vti1a	24.986	5.2971	11.1	3	4	3	0.996	1.038	1.031	1.005	1.002	1.028	0.993	0.925	0.97	0.25514
P00158	Cytochrome b OS=Mus musculus OX=10090 GN=Mt-Cyb	Mt-Cyb	43.209	2.4568	4.2	2	3	2	1.054	0.979	1.052	1.046	1.016	0.918	0.989	0.955	0.939	0.065704
P00375	Dihydrofolate reductase OS=Mus musculus OX=10090 GN=Dhfr	Dhfr	21.606	9.0222	21.9	4	4	4	0.993	0.995	0.95	1.169	0.933	0.978	1.027	0.98	0.954	0.4044
P00405	Cytochrome c oxidase subunit 2 OS=Mus musculus OX=10090 GN=Mtco2	Mtco2	25.976	37.591	35.2	7	16	7	0.96	0.987	1	1.058	1.008	0.976	0.932	1.004	0.979	0.4645
P00493	Hypoxanthine-guanine phosphoribosyltransferase OS=Mus musculus OX=10090 GN=Hprt1	Hprt1	24.57	82.863	54.6	10	27	10	1.009	0.999	0.968	1.008	1.002	1.047	0.995	1.017	1.019	0.2473
P00520	Tyrosine-protein kinase ABL1 OS=Mus musculus OX=10090 GN=Abl1	Abl1	122.67	6.2109	2.1	2	2	2	1.035	1.039	1.033	0.999	1.05	0.867	0.969	1.016	0.95	0.30056
P00848	ATP synthase subunit a OS=Mus musculus OX=10090 GN=Mtatp6	Mtatp6	25.095	2.6219	4	1	1	1
P00920	Carbonic anhydrase 2 OS=Mus musculus OX=10090 GN=Ca2	Ca2	29.032	93.439	47.7	9	17	9	1.021	0.943	0.952	1.125	1.026	1.02	1.004	0.972	0.995	0.95672
P01027	Complement C3 OS=Mus musculus OX=10090 GN=C3	C3	186.48	133.8	19.2	31	30	26	0.975	0.911	0.991	1.307	1.096	0.861	0.892	0.935	0.904	0.36024
P01029	Complement C4-B OS=Mus musculus OX=10090 GN=C4b	C4b	192.91	4.6284	1.9	3	3	3	0.702	0.569	0.654	0.765	1.054	1.417	1.563	1.3	1.983	0.00063636
P01132	Pro-epidermal growth factor OS=Mus musculus OX=10090 GN=Egf	Egf	133.07	1.6139	0.6	1	1	1	1.022	1.009	0.978	0.899	1.045	1.039	1.069	0.955	1.051	0.23408
P01831	Thy-1 membrane glycoprotein OS=Mus musculus OX=10090 GN=Thy1	Thy1	18.08	39.67	31.5	4	9	4	1.144	0.95	0.972	0.942	1.031	0.99	0.923	1.002	0.985	0.8062
P01837	Immunoglobulin kappa constant OS=Mus musculus OX=10090 GN=Igkc	Igkc	11.934	28.414	30.8	3	7	3	1.1	0.98	1.039	1.596	0.8	0.813	0.846	0.694	0.669	0.0171198
P01868	Ig gamma-1 chain C region secreted form OS=Mus musculus OX=10090 GN=Ighg1	Ighg1	35.704	23.02	20.4	5	9	5	1.012	0.905	1.02	1.962	0.759	0.805	0.765	0.678	0.614	0.092677
P01872	Ig mu chain C region OS=Mus musculus OX=10090 GN=Ighm	Ighm	49.971	5.7485	3.5	1	1	1
P01900	H-2 class I histocompatibility antigen, D-D alpha chain OS=Mus musculus OX=10090 GN=H2-D1	H2-D1	41.11	36.343	21.4	7	10	2	0.738	0.65	0.649	0.588	1.123	1.17	1.359	1.721	2.047	0.00059593
P01902	H-2 class I histocompatibility antigen, K-D alpha chain OS=Mus musculus OX=10090 GN=H2-K1	H2-K1	41.489	22.025	21.5	7	9	4	0.653	0.687	0.695	0.691	1.08	1.148	1.306	1.742	1.935	0.0092819
P01942	Hemoglobin subunit alpha OS=Mus musculus OX=10090 GN=Hba	Hba	15.085	95.25	46.5	6	32	6	0.946	0.75	0.911	1.144	1.063	1.083	1.122	0.88	1.106	0.33354
P02088	Hemoglobin subunit beta-1 OS=Mus musculus OX=10090 GN=Hbb-b1	Hbb-b1	15.84	188.32	75.5	11	89	5	0.986	0.788	0.873	1.124	1.109	1.148	1.059	0.913	1.121	0.23998
P02089	Hemoglobin subunit beta-2 OS=Mus musculus OX=10090 GN=Hbb-b2	Hbb-b2	15.878	81.074	72.1	11	62	5	1.193	0.605	1.092	1.438	0.815	0.965	1.223	0.719	0.86	0.594
P02463	Collagen alpha-1(IV) chain OS=Mus musculus OX=10090 GN=Col4a1	Col4a1	160.68	22.303	3	4	8	4	0.936	1.013	0.926	1.006	0.949	1.059	0.976	1.031	1.035	0.36258
P02468	Laminin subunit gamma-1 OS=Mus musculus OX=10090 GN=Lamc1	Lamc1	177.3	118.5	11.4	16	18	16	1.046	1.059	1.012	0.999	1.022	0.896	0.934	1.041	0.946	0.185841
P02469	Laminin subunit beta-1 OS=Mus musculus OX=10090 GN=Lamb1	Lamb1	197.09	25.42	7.1	13	14	13	1.07	1.113	1.157	1.002	0.938	0.912	0.873	0.942	0.844	0.0030956
P02772	Alpha-fetoprotein OS=Mus musculus OX=10090 GN=Afp	Afp	67.337	92.385	40	20	26	20	1.92	1.049	1.805	1.063	0.535	0.672	0.524	0.426	0.37	0.0021577
P02802	Metallothionein-1 OS=Mus musculus OX=10090 GN=Mt1	Mt1	6.0181	6.7789	21.3	2	3	2	0.493	0.635	0.723	0.652	1.279	1.518	1.545	1.131	2.187	0.00038288
P03888	NADH-ubiquinone oxidoreductase chain 1 OS=Mus musculus OX=10090 GN=Mtnd1	Mtnd1	36.059	12.009	6.3	2	2	2
P03899	NADH-ubiquinone oxidoreductase chain 3 OS=Mus musculus OX=10090 GN=Mtnd3	Mtnd3	13.219	24.182	13	1	2	1	1.131	1.032	0.902	1.199	0.974	1.092	0.823	0.873	0.882	0.20376
P03903	NADH-ubiquinone oxidoreductase chain 4L OS=Mus musculus OX=10090 GN=Mtnd4l	Mtnd4l	10.607	4.8354	18.4	1	1	1	1.063	0.754	1.037	1.242	0.999	0.997	0.905	1.006	0.954	0.78308
P03911	NADH-ubiquinone oxidoreductase chain 4 OS=Mus musculus OX=10090 GN=Mtnd4	Mtnd4	51.881	5.0556	4.6	2	3	2	1.043	0.939	0.997	0.932	1.098	0.978	0.997	1.02	1.047	0.26084
P03921	NADH-ubiquinone oxidoreductase chain 5 OS=Mus musculus OX=10090 GN=Mtnd5	Mtnd5	68.474	9.2899	6.9	3	4	3	0.978	1.097	1.021	1.03	0.976	0.913	1.005	0.999	0.944	0.122856
P03930	ATP synthase protein 8 OS=Mus musculus OX=10090 GN=Mtatp8	Mtatp8	7.7662	7.6532	46.3	3	5	3	0.957	1.094	0.952	1.241	0.879	1.183	0.809	0.92	0.893	0.29982
P03958	Adenosine deaminase OS=Mus musculus OX=10090 GN=Ada	Ada	39.991	5.7994	6.8	3	3	3	0.989	0.835	0.997	0.968	0.995	1.047	1.097	1.081	1.114	0.058277
P03975	IgE-binding protein OS=Mus musculus OX=10090 GN=Iap	Iap	62.747	6.861	4.5	3	3	3	0.93	0.88	1.319	1.14	0.981	1.052	0.906	0.796	0.875	0.30024
P03987	Ig gamma-3 chain C region OS=Mus musculus OX=10090	---	43.929	6.6804	2.5	1	1	1
P03995	Glial fibrillary acidic protein OS=Mus musculus OX=10090 GN=Gfap	Gfap	49.899	163	59.8	25	56	23	0.844	0.896	0.899	1.29	0.956	1.027	1.049	1.083	1.047	0.57144
P04186	Complement factor B OS=Mus musculus OX=10090 GN=Cfb	Cfb	85.004	13.052	7.1	5	5	5	0.82	0.783	0.834	1.057	1.149	1.068	1.121	1.179	1.293	0.0096796
P04247	Myoglobin OS=Mus musculus OX=10090 GN=Mb	Mb	17.069	9.8664	18.8	2	3	2	0.516	0.682	0.666	0.64	1.618	2.386	0.893	0.63	2.207	0.115775
P04370	Myelin basic protein OS=Mus musculus OX=10090 GN=Mbp	Mbp	27.167	9.0697	12.8	3	4	3	0.817	1.024	0.847	2.073	0.962	0.796	0.695	0.832	0.69	0.23438
P04627	Serine/threonine-protein kinase A-Raf OS=Mus musculus OX=10090 GN=Araf	Araf	67.581	26.733	15.4	9	12	5	1.015	1.049	0.982	0.978	1.02	1.008	1.013	0.939	0.989	0.67486
P04919	Band 3 anion transport protein OS=Mus musculus OX=10090 GN=Slc4a1	Slc4a1	103.13	15.658	4.5	3	3	3
P04925	Major prion protein OS=Mus musculus OX=10090 GN=Prnp	Prnp	27.977	38.861	25.2	7	18	7	0.938	1.002	0.953	0.959	1.042	1.025	1.047	1.008	1.07	0.0063179
P05063	Fructose-bisphosphate aldolase C OS=Mus musculus OX=10090 GN=Aldoc	Aldoc	39.394	289.23	63.6	26	99	20	0.833	0.877	0.865	1.104	1.057	1.071	1.092	1.08	1.169	0.085863
P05064	Fructose-bisphosphate aldolase A OS=Mus musculus OX=10090 GN=Aldoa	Aldoa	39.355	323.31	60.2	27	124	21	1.006	0.989	1.001	1.035	1.004	0.978	1.001	1.006	0.99	0.40644
P05132	cAMP-dependent protein kinase catalytic subunit alpha OS=Mus musculus OX=10090 GN=Prkaca	Prkaca	40.57	106.73	32.5	11	28	5	0.963	1.01	1.01	0.984	1.014	0.988	1.023	0.985	1.011	0.49326
P05201	Aspartate aminotransferase, cytoplasmic OS=Mus musculus OX=10090 GN=Got1	Got1	46.247	114.79	50.1	20	49	20	0.974	0.97	0.994	1.083	0.996	0.985	0.971	1.042	0.993	0.84562
P05202	Aspartate aminotransferase, mitochondrial OS=Mus musculus OX=10090 GN=Got2	Got2	47.411	155.58	53.5	24	62	24	0.985	0.998	1	1.02	0.998	0.98	0.982	1.015	0.993	0.54196
P05213	Tubulin alpha-1B chain OS=Mus musculus OX=10090 GN=Tuba1b	Tuba1b	50.151	13.885	58.5	32	497	0
P05480	Neuronal proto-oncogene tyrosine-protein kinase Src OS=Mus musculus OX=10090 GN=Src	Src	60.644	159.53	32.5	16	29	12	1.013	0.996	0.963	0.976	1.015	1.032	1	1.012	1.028	0.074122
P05532	Mast/stem cell growth factor receptor Kit OS=Mus musculus OX=10090 GN=Kit	Kit	109.34	54.348	16.6	17	20	17	0.967	1.028	0.965	0.992	1.051	0.987	0.979	0.996	1.015	0.50966
P05622	Platelet-derived growth factor receptor beta OS=Mus musculus OX=10090 GN=Pdgfrb	Pdgfrb	122.8	7.8017	3.4	3	5	3	1.019	0.971	0.942	1.082	1.019	0.969	0.995	0.957	0.982	0.61802
P05977	Myosin light chain 1/3, skeletal muscle isoform OS=Mus musculus OX=10090 GN=Myl1	Myl1	20.594	9.4908	8.5	1	5	1	1.034	0.987	0.996	1.09	0.93	1.013	0.996	1.008	0.961	0.23624
P06151	L-lactate dehydrogenase A chain OS=Mus musculus OX=10090 GN=Ldha	Ldha	36.498	119.21	46.1	18	54	16	1.061	1.059	1.052	1.021	0.98	0.951	0.962	0.965	0.92	0.00025952
P06537	Glucocorticoid receptor OS=Mus musculus OX=10090 GN=Nr3c1	Nr3c1	86.052	31.761	5.4	3	3	3	1.354	1.166	1.21	1.089	0.753	0.936	0.719	0.789	0.663	0.00135952
P06728	Apolipoprotein A-IV OS=Mus musculus OX=10090 GN=Apoa4	Apoa4	45.029	64.052	32.7	11	13	11	1.257	1.159	1.266	1.445	0.723	0.925	0.487	0.684	0.55	0.0043813
P06745	Glucose-6-phosphate isomerase OS=Mus musculus OX=10090 GN=Gpi	Gpi	62.766	201.25	40.3	20	78	20	0.993	1.019	1.013	1.075	0.972	0.965	0.955	1.004	0.95	0.044861
P06797	Cathepsin L1 OS=Mus musculus OX=10090 GN=Ctsl	Ctsl	37.547	16.4	15	5	6	5	1.02	0.982	1.137	0.894	0.995	0.974	0.949	0.895	0.945	0.36914
P06800	Receptor-type tyrosine-protein phosphatase C OS=Mus musculus OX=10090 GN=Ptprc	Ptprc	144.84	2.9917	0.8	1	1	1	0.756	0.912	0.61	0.667	1.196	1.44	1.072	1.366	1.723	0.0024383
P06801	NADP-dependent malic enzyme OS=Mus musculus OX=10090 GN=Me1	Me1	63.953	115.31	41.8	22	43	22	1.022	1.062	1.009	1	0.989	0.952	0.975	0.957	0.946	0.0133361
P06837	Neuromodulin OS=Mus musculus OX=10090 GN=Gap43	Gap43	23.632	242.98	63.9	13	44	13	0.918	1.059	0.966	0.915	1.022	1.172	1.019	1.01	1.095	0.116703
P06909	Complement factor H OS=Mus musculus OX=10090 GN=Cfh	Cfh	139.14	16.753	5.3	5	5	5	0.937	0.889	0.898	0.955	1.092	0.983	1.211	1.049	1.178	0.0137218
P07214	SPARC OS=Mus musculus OX=10090 GN=Sparc	Sparc	34.45	40.032	16.9	5	7	5	0.953	0.969	0.917	1.08	1.036	1.071	0.976	1.017	1.046	0.29008
P07309	Transthyretin OS=Mus musculus OX=10090 GN=Ttr	Ttr	15.776	29.896	30.6	4	10	4	1.191	1.151	1.143	1.272	0.748	0.849	0.89	0.748	0.68	0.0002607
P07310	Creatine kinase M-type OS=Mus musculus OX=10090 GN=Ckm	Ckm	43.044	5.1464	16.5	4	12	3	0.928	0.902	0.806	1.064	1.115	1.264	0.958	0.987	1.169	0.11964
P07356	Annexin A2 OS=Mus musculus OX=10090 GN=Anxa2	Anxa2	38.676	91.66	49	18	32	18	1.14	0.96	0.963	1.027	0.996	1.019	0.921	1.022	0.968	0.53114
P07724	Serum albumin OS=Mus musculus OX=10090 GN=Alb	Alb	68.692	323.31	65.6	40	130	37	1.115	1.002	1.031	1.341	0.851	0.971	0.955	0.752	0.786	0.035336
P07742	Ribonucleoside-diphosphate reductase large subunit OS=Mus musculus OX=10090 GN=Rrm1	Rrm1	90.209	43.597	13	9	11	9	0.955	1.053	0.963	1.219	0.947	0.973	0.885	0.921	0.889	0.109379
P07759	Serine protease inhibitor A3K OS=Mus musculus OX=10090 GN=Serpina3k	Serpina3k	46.879	54.039	23.9	7	12	5	0.448	0.338	0.453	0.815	1.556	1.601	1.59	1.19	2.89	0.00139698
P07901	Heat shock protein HSP 90-alpha OS=Mus musculus OX=10090 GN=Hsp90aa1	Hsp90aa1	84.787	272.75	43.9	36	162	26	1.045	1.029	1.049	1.061	0.961	0.905	0.936	0.973	0.902	0.00097792
P07903	DNA excision repair protein ERCC-1 OS=Mus musculus OX=10090 GN=Ercc1	Ercc1	32.909	2.5244	3.7	1	1	1
P08003	Protein disulfide-isomerase A4 OS=Mus musculus OX=10090 GN=Pdia4	Pdia4	71.982	242.66	44	29	58	29	1.099	1.071	1.086	1.093	0.936	0.889	0.908	0.952	0.847	5.5944e-05
P08030	Adenine phosphoribosyltransferase OS=Mus musculus OX=10090 GN=Aprt	Aprt	19.724	13.771	27.8	6	8	6	1.033	1.016	1.042	1.002	0.968	0.987	0.956	0.973	0.949	0.0030351
P08032	Spectrin alpha chain, erythrocytic 1 OS=Mus musculus OX=10090 GN=Spta1	Spta1	279.86	8.0489	1.7	4	7	3	1.128	0.891	0.977	1.076	0.96	1.011	1.048	0.924	0.968	0.6394
P08043	Zinc finger protein 2 OS=Mus musculus OX=10090 GN=Zfp2	Zfp2	52.534	9.4405	8.5	3	4	1	1.113	1.167	1.046	0.879	1.069	0.898	0.839	0.996	0.904	0.27098
P08113	Endoplasmin OS=Mus musculus OX=10090 GN=Hsp90b1	Hsp90b1	92.475	187	35.7	29	73	27	1.039	1.034	1.075	1.1	0.947	0.918	0.897	0.989	0.883	0.0028402
P08121	Collagen alpha-1(III) chain OS=Mus musculus OX=10090 GN=Col3a1	Col3a1	138.94	2.6021	0.6	1	1	1	1.236	0.94	0.939	0.881	1.066	1.067	0.973	0.904	1.004	0.9104
P08122	Collagen alpha-2(IV) chain OS=Mus musculus OX=10090 GN=Col4a2	Col4a2	167.32	27.735	4.5	6	7	6	0.961	1.028	1.051	0.945	1.013	1.036	1.048	0.935	1.012	0.7578
P08207	Protein S100-A10 OS=Mus musculus OX=10090 GN=S100a10	S100a10	11.186	1.4315	10.3	1	1	1	1.042	0.867	1.048	0.902	1.088	1.086	1.009	0.961	1.074	0.24832
P08226	Apolipoprotein E OS=Mus musculus OX=10090 GN=Apoe	Apoe	35.866	29.426	28.6	9	10	9	0.941	1.094	0.966	1.099	0.895	1.021	0.892	1.061	0.944	0.37086
P08228	Superoxide dismutase [Cu-Zn] OS=Mus musculus OX=10090 GN=Sod1	Sod1	15.942	45.392	42.9	6	17	6	1.102	1.018	0.978	0.957	1.034	0.972	1.005	0.931	0.972	0.49996
P08249	Malate dehydrogenase, mitochondrial OS=Mus musculus OX=10090 GN=Mdh2	Mdh2	35.611	284.52	62.4	20	107	20	0.983	0.99	0.984	1.031	0.99	0.987	0.991	1.026	1.002	0.91762
P08414	Calcium/calmodulin-dependent protein kinase type IV OS=Mus musculus OX=10090 GN=Camk4	Camk4	52.627	86.357	40.9	18	38	18	0.957	0.986	1.002	0.924	1.015	1.037	1.069	1.016	1.069	0.020705
P08508	Low affinity immunoglobulin gamma Fc region receptor III OS=Mus musculus OX=10090 GN=Fcgr3	Fcgr3	30.036	4.237	3.8	1	2	1
P08551	Neurofilament light polypeptide OS=Mus musculus OX=10090 GN=Nefl	Nefl	61.508	185.48	48.6	27	63	24	0.854	1.156	0.941	1.445	0.98	0.902	0.811	0.944	0.827	0.21556
P08553	Neurofilament medium polypeptide OS=Mus musculus OX=10090 GN=Nefm	Nefm	95.915	280.56	37.9	35	90	31	0.889	1.128	0.982	1.366	0.959	0.893	0.871	0.959	0.844	0.152259
P08556	GTPase NRas OS=Mus musculus OX=10090 GN=Nras	Nras	21.199	2.708	31.2	5	14	1	1.072	0.97	1.057	0.99	0.942	0.9	1.046	1.032	0.959	0.3599
P08752	Guanine nucleotide-binding protein G(i) subunit alpha-2 OS=Mus musculus OX=10090 GN=Gnai2	Gnai2	40.489	122.21	56.6	17	48	9	0.992	1.056	0.964	1	0.956	1.027	0.963	0.981	0.979	0.42668
P08775	DNA-directed RNA polymerase II subunit RPB1 OS=Mus musculus OX=10090 GN=Polr2a	Polr2a	217.17	73.079	13.1	20	21	20	0.962	0.994	1.019	1.062	0.956	0.999	1.037	1.044	1	0.99458
P09055	Integrin beta-1 OS=Mus musculus OX=10090 GN=Itgb1	Itgb1	88.231	85.968	17.4	13	20	13	1.024	1.049	1.041	1.042	1.008	0.927	0.943	0.977	0.928	0.0079201
P09103	Protein disulfide-isomerase OS=Mus musculus OX=10090 GN=P4hb	P4hb	57.058	159.31	44.6	26	55	26	1.043	0.988	1.036	1.046	0.97	0.995	0.96	0.962	0.945	0.011519
P09242	Alkaline phosphatase, tissue-nonspecific isozyme OS=Mus musculus OX=10090 GN=Alpl	Alpl	57.514	35.278	19.1	7	8	7	1.076	0.927	1.034	0.999	0.933	1.049	0.932	1.067	0.986	0.77838
P09405	Nucleolin OS=Mus musculus OX=10090 GN=Ncl	Ncl	76.722	189.27	41.3	36	75	36	0.979	0.966	0.973	0.989	0.98	1.056	1.042	1.002	1.044	0.054102
P09411	Phosphoglycerate kinase 1 OS=Mus musculus OX=10090 GN=Pgk1	Pgk1	44.55	291.24	78.4	32	121	32	0.983	0.988	1.017	1.048	1.004	0.975	0.98	1.005	0.982	0.33056
P09470	Angiotensin-converting enzyme OS=Mus musculus OX=10090 GN=Ace	Ace	150.92	19.194	6.7	7	7	7	0.928	1.257	1.077	0.809	0.999	1.136	1.059	0.768	0.973	0.85666
P09528	Ferritin heavy chain OS=Mus musculus OX=10090 GN=Fth1	Fth1	21.066	110.51	55.5	8	19	8	0.896	0.873	1.03	1.027	1.015	1.152	0.974	1.072	1.101	0.138622
P09581	Macrophage colony-stimulating factor 1 receptor OS=Mus musculus OX=10090 GN=Csf1r	Csf1r	109.18	1.8956	1.5	1	1	1
P09602	Non-histone chromosomal protein HMG-17 OS=Mus musculus OX=10090 GN=Hmgn2	Hmgn2	9.4226	4.5721	18.9	3	6	3	0.834	0.914	0.797	0.851	0.994	1.406	1.365	0.975	1.396	0.020842
P09631	Homeobox protein Hox-A9 OS=Mus musculus OX=10090 GN=Hoxa9	Hoxa9	29.916	-2	3	1	1	1
P09671	Superoxide dismutase [Mn], mitochondrial OS=Mus musculus OX=10090 GN=Sod2	Sod2	24.603	67.647	41.9	9	30	9	1.036	1.014	1.004	1.03	0.991	1.001	0.936	0.997	0.961	0.0602
P09922	Interferon-induced GTP-binding protein Mx1 OS=Mus musculus OX=10090 GN=Mx1	Mx1	72.037	1.4939	2.2	2	4	1	0.988	0.991	1.01	1.049	1.017	0.997	0.947	1.015	0.985	0.49722
P09925	Surfeit locus protein 1 OS=Mus musculus OX=10090 GN=Surf1	Surf1	34.798	7.5631	11.4	3	3	3
P0C028	Diphosphoinositol polyphosphate phosphohydrolase 3-beta OS=Mus musculus OX=10090 GN=Nudt11	Nudt11	18.593	48.555	51.8	8	13	5	0.972	0.988	0.953	1.017	0.95	0.977	1	1.059	1.014	0.62984
P0C090	Roquin-2 OS=Mus musculus OX=10090 GN=Rc3h2	Rc3h2	131.29	7.0924	3	3	3	3
P0C0A3	Charged multivesicular body protein 6 OS=Mus musculus OX=10090 GN=Chmp6	Chmp6	23.415	2.5425	4	1	2	1	0.926	0.953	0.923	1.061	0.987	1.173	1.024	0.978	1.077	0.217
P0C192	Leucine-rich repeat-containing protein 4B OS=Mus musculus OX=10090 GN=Lrrc4b	Lrrc4b	76.155	64.861	18.3	11	18	9	0.974	0.963	1.009	0.913	0.981	1.095	1.008	1.049	1.071	0.074263
P0C605	cGMP-dependent protein kinase 1 OS=Mus musculus OX=10090 GN=Prkg1	Prkg1	76.35	4.193	3.4	2	2	2	0.926	0.888	0.991	0.982	1.108	0.865	1.124	1.12	1.114	0.1878
P0C7L0	WAS/WASL-interacting protein family member 3 OS=Mus musculus OX=10090 GN=Wipf3	Wipf3	49.452	7.6388	8.9	4	4	4	1.007	1.15	1.098	1.057	1.107	0.82	0.958	0.818	0.859	0.086597
P0C7M9	C-type lectin domain family 2 member L OS=Mus musculus OX=10090 GN=Clec2l	Clec2l	23.653	11.825	19.9	5	7	5	0.966	0.952	0.917	1.091	0.986	1.012	0.987	1.007	1.017	0.65704
P0C7N9	Proteasome assembly chaperone 4 OS=Mus musculus OX=10090 GN=Psmg4	Psmg4	13.974	27.133	30.1	2	2	2	1.012	1.02	0.937	1.168	1.029	1.047	0.727	1.075	0.937	0.5028
P0C7W3	Prosalusin OS=Mus musculus OX=10090 GN=Tor2a	Tor2a	25.376	3.5268	4.3	1	2	1
P0DN34	NADH dehydrogenase [ubiquinone] 1 beta subcomplex subunit 1 OS=Mus musculus OX=10090 GN=Ndufb1	Ndufb1	6.954	2.1687	19.3	1	2	1
P0DN91	Transmembrane protein 254c OS=Mus musculus OX=10090 GN=Tmem254c	Tmem254c	14.238	5.2459	8.9	1	1	1	1.07	1.005	0.988	1.044	0.969	1.064	0.932	0.946	0.952	0.2026
P0DP28	Calmodulin-3 OS=Mus musculus OX=10090 GN=Calm3	Calm3	16.837	109.13	49.7	8	45	8	0.919	0.993	1.048	0.965	1.01	1.029	0.93	1.03	1.019	0.62352
P10078	Zinc finger protein 28 OS=Mus musculus OX=10090 GN=Zfp28	Zfp28	93.308	3.4714	2.4	2	3	0
P10107	Annexin A1 OS=Mus musculus OX=10090 GN=Anxa1	Anxa1	38.734	29.329	23.4	7	9	7	1.149	0.902	0.983	0.971	0.916	1.006	1.025	1.036	0.995	0.96422
P10126	Elongation factor 1-alpha 1 OS=Mus musculus OX=10090 GN=Eef1a1	Eef1a1	50.113	216.01	44.2	24	89	13	1.059	1.023	1.043	1.013	0.995	0.937	0.976	0.959	0.935	0.0057397
P10417	Apoptosis regulator Bcl-2 OS=Mus musculus OX=10090 GN=Bcl2	Bcl2	26.407	3.3855	4.2	1	1	1
P10493	Nidogen-1 OS=Mus musculus OX=10090 GN=Nid1	Nid1	136.54	129.31	11.6	12	15	11	1.003	1.056	1.008	1.071	0.985	0.972	0.956	0.949	0.933	0.0098419
P10518	Delta-aminolevulinic acid dehydratase OS=Mus musculus OX=10090 GN=Alad	Alad	36.023	80.746	33.9	10	23	10	1.01	1.015	0.989	0.955	1.028	1.003	0.997	1.02	1.02	0.24836
P10605	Cathepsin B OS=Mus musculus OX=10090 GN=Ctsb	Ctsb	37.279	81.546	32.7	10	28	10	0.998	0.981	0.949	0.946	1.006	1.075	1.062	0.982	1.065	0.048299
P10630	Eukaryotic initiation factor 4A-II OS=Mus musculus OX=10090 GN=Eif4a2	Eif4a2	46.402	77.803	48.4	23	61	10	1.021	1.074	1.037	1.017	1.004	0.914	0.957	0.961	0.925	0.0137151
P10637	Microtubule-associated protein tau OS=Mus musculus OX=10090 GN=Mapt	Mapt	76.243	226.31	27	18	65	18	0.993	0.995	1.046	0.918	1.135	0.934	1.005	0.937	1.015	0.81822
P10639	Thioredoxin OS=Mus musculus OX=10090 GN=Txn	Txn	11.675	24.511	51.4	7	15	7	0.947	0.948	1.034	1.052	1.035	0.993	0.996	1.03	1.018	0.5463
P10649	Glutathione S-transferase Mu 1 OS=Mus musculus OX=10090 GN=Gstm1	Gstm1	25.97	87.553	65.1	14	39	8	0.908	0.868	0.881	1.009	1.029	1.127	1.103	1.107	1.191	0.0042752
P10711	Transcription elongation factor A protein 1 OS=Mus musculus OX=10090 GN=Tcea1	Tcea1	33.88	102.03	45.5	13	22	13	1.025	1.034	0.962	0.991	0.974	1.027	1.003	0.969	0.99	0.66814
P10755	Zinc finger protein 14 OS=Mus musculus OX=10090 GN=Zfp14	Zfp14	59.059	8.8134	4.4	1	1	1	1.069	1.114	0.922	0.956	1.025	0.991	0.975	0.969	0.975	0.64754
P10833	Ras-related protein R-Ras OS=Mus musculus OX=10090 GN=Rras	Rras	23.764	4.236	17.9	3	10	1	0.962	0.862	1.094	0.906	1.187	0.836	1.131	1.016	1.09	0.4138
P10852	4F2 cell-surface antigen heavy chain OS=Mus musculus OX=10090 GN=Slc3a2	Slc3a2	58.336	139.61	30.2	15	28	15	0.999	0.951	0.983	1.015	1.013	0.988	1.012	1.017	1.021	0.2258
P10853	Histone H2B type 1-F/J/L OS=Mus musculus OX=10090 GN=Hist1h2bf	Hist1h2bf	13.936	64.03	79.4	12	100	0
P10922	Histone H1.0 OS=Mus musculus OX=10090 GN=H1f0	H1f0	20.861	7.955	16	3	4	3	0.788	0.929	0.996	1.042	0.83	1.187	1.317	0.95	1.141	0.35718
P11031	Activated RNA polymerase II transcriptional coactivator p15 OS=Mus musculus OX=10090 GN=Sub1	Sub1	14.427	21.266	35.4	4	13	4	1.061	1.061	1.102	0.974	0.998	0.928	0.895	0.971	0.903	0.028918
P11087	Collagen alpha-1(I) chain OS=Mus musculus OX=10090 GN=Col1a1	Col1a1	138.03	13.304	4.4	5	5	5	1.038	1.015	0.93	0.904	1.123	1.047	0.944	0.918	1.037	0.56408
P11103	Poly [ADP-ribose] polymerase 1 OS=Mus musculus OX=10090 GN=Parp1	Parp1	113.1	87.477	18.6	16	18	16	1.024	1.089	1.095	0.946	0.992	0.958	0.93	0.961	0.925	0.080161
P11152	Lipoprotein lipase OS=Mus musculus OX=10090 GN=Lpl	Lpl	53.109	14.734	5.7	2	2	2	1.055	1.113	1.155	0.826	0.924	0.855	1.041	1.038	0.93	0.47616
P11276	Fibronectin OS=Mus musculus OX=10090 GN=Fn1	Fn1	272.53	116.63	11.8	24	25	24	0.901	0.87	0.949	0.958	1.093	1.127	1.035	1.038	1.167	0.0023565
P11352	Glutathione peroxidase 1 OS=Mus musculus OX=10090 GN=Gpx1	Gpx1	22.329	32.42	30.8	7	11	7	0.893	0.943	0.944	1.093	0.949	1.147	1.008	1.009	1.062	0.34352
P11404	Fatty acid-binding protein, heart OS=Mus musculus OX=10090 GN=Fabp3	Fabp3	14.819	26.324	42.9	7	20	7	1.001	0.995	1.016	1.015	1.009	0.949	1.015	0.984	0.983	0.3112
P11438	Lysosome-associated membrane glycoprotein 1 OS=Mus musculus OX=10090 GN=Lamp1	Lamp1	43.865	20.636	10.1	4	10	4	1.153	1.001	0.948	1.088	1.022	0.981	0.916	1.002	0.936	0.24156
P11499	Heat shock protein HSP 90-beta OS=Mus musculus OX=10090 GN=Hsp90ab1	Hsp90ab1	83.28	323.31	50.6	40	170	28	1.093	1.07	1.096	1.102	0.944	0.874	0.892	0.946	0.838	0.000157613
P11531	Dystrophin OS=Mus musculus OX=10090 GN=Dmd	Dmd	425.83	23.51	2	6	7	6	1.012	1.005	1.001	0.96	1.016	1.007	1.056	0.959	1.015	0.55104
P11627	Neural cell adhesion molecule L1 OS=Mus musculus OX=10090 GN=L1cam	L1cam	140.97	198.71	26.3	30	81	30	0.988	1.032	0.997	0.999	1.001	0.994	0.999	1.016	0.999	0.90006
P11688	Integrin alpha-5 OS=Mus musculus OX=10090 GN=Itga5	Itga5	115.04	2.3176	1.4	2	2	2	1.043	0.991	1.012	1.105	1.127	0.913	0.972	0.848	0.93	0.27792
P11798	Calcium/calmodulin-dependent protein kinase type II subunit alpha OS=Mus musculus OX=10090 GN=Camk2a	Camk2a	54.114	63.603	37.4	17	55	11	1.037	0.961	1.028	0.88	0.998	0.911	1.085	1.057	1.037	0.5275
P11859	Angiotensinogen OS=Mus musculus OX=10090 GN=Agt	Agt	51.99	22.747	21.2	7	9	7	0.645	0.692	0.618	0.695	1.17	1.599	1.348	1.163	1.992	0.000142543
P11881	Inositol 1,4,5-trisphosphate receptor type 1 OS=Mus musculus OX=10090 GN=Itpr1	Itpr1	313.16	62.26	6.9	21	22	16	0.892	0.872	0.937	1.695	0.867	0.858	0.892	0.845	0.788	0.30348
P11930	Nucleoside diphosphate-linked moiety X motif 19 OS=Mus musculus OX=10090 GN=Nudt19	Nudt19	40.32	6.7707	10.1	2	2	2
P11983	T-complex protein 1 subunit alpha OS=Mus musculus OX=10090 GN=Tcp1	Tcp1	60.448	168.68	45.5	22	55	22	1.02	1.008	1.008	0.988	0.987	1.028	1.015	0.997	1.001	0.95324
P12023	Amyloid-beta A4 protein OS=Mus musculus OX=10090 GN=App	App	86.721	133.41	24.5	16	35	15	1.032	1.066	1.067	0.96	1.057	0.949	0.945	0.958	0.948	0.18894
P12025	Midkine OS=Mus musculus OX=10090 GN=Mdk	Mdk	15.434	3.3539	7.1	1	1	1	1.211	1.061	1.112	1.123	0.946	0.814	0.795	0.944	0.776	0.0032805
P12032	Metalloproteinase inhibitor 1 OS=Mus musculus OX=10090 GN=Timp1	Timp1	22.628	-2	4.4	1	1	1	0.928	1.001	0.992	0.997	1.034	1.026	1.09	0.952	1.047	0.2214
P12246	Serum amyloid P-component OS=Mus musculus OX=10090 GN=Apcs	Apcs	26.247	2.6421	4.5	1	1	1
P12265	Beta-glucuronidase OS=Mus musculus OX=10090 GN=Gusb	Gusb	74.194	12.112	9.7	7	8	7	0.984	1	0.994	1.105	0.937	0.922	1.001	1.03	0.953	0.24764
P12367	cAMP-dependent protein kinase type II-alpha regulatory subunit OS=Mus musculus OX=10090 GN=Prkar2a	Prkar2a	45.389	53.467	37.2	14	42	12	0.966	1.021	0.937	0.973	1.004	1.067	0.978	1.027	1.046	0.130385
P12382	ATP-dependent 6-phosphofructokinase, liver type OS=Mus musculus OX=10090 GN=Pfkl	Pfkl	85.359	117.51	28.1	21	42	16	1.092	1.105	1.034	1.075	0.939	0.915	0.943	1.016	0.886	0.0038441
P12657	Muscarinic acetylcholine receptor M1 OS=Mus musculus OX=10090 GN=Chrm1	Chrm1	51.378	2.8297	2.8	1	1	1
P12658	Calbindin OS=Mus musculus OX=10090 GN=Calb1	Calb1	29.994	89.826	39.8	13	37	12	0.97	0.932	0.939	1.439	0.935	0.923	0.937	0.978	0.882	0.37964
P12787	Cytochrome c oxidase subunit 5A, mitochondrial OS=Mus musculus OX=10090 GN=Cox5a	Cox5a	16.101	24.753	41.1	6	16	6	0.964	0.997	1.029	1.068	0.974	0.972	0.997	1.006	0.973	0.30052
P12815	Programmed cell death protein 6 OS=Mus musculus OX=10090 GN=Pdcd6	Pdcd6	21.867	16.927	24.6	6	9	6	0.94	0.898	0.929	1.017	1.032	1.096	1.011	1.137	1.13	0.0177351
P12849	cAMP-dependent protein kinase type I-beta regulatory subunit OS=Mus musculus OX=10090 GN=Prkar1b	Prkar1b	43.224	48.951	28.3	12	16	7	1.11	0.979	1.09	1.052	0.995	0.941	0.913	0.963	0.901	0.020476
P12960	Contactin-1 OS=Mus musculus OX=10090 GN=Cntn1	Cntn1	113.39	323.31	50.5	45	157	45	0.966	1.001	0.984	0.992	1.016	1.002	0.989	1.029	1.024	0.087983
P12970	60S ribosomal protein L7a OS=Mus musculus OX=10090 GN=Rpl7a	Rpl7a	29.976	64.567	41.4	13	18	13	0.947	1.02	1.07	1.089	0.916	0.995	1.004	0.966	0.941	0.157985
P13020	Gelsolin OS=Mus musculus OX=10090 GN=Gsn	Gsn	85.941	66.317	21.9	16	21	16	1.032	0.949	1.016	1.153	0.995	0.956	0.939	0.973	0.931	0.151039
P13379	T-cell surface glycoprotein CD5 OS=Mus musculus OX=10090 GN=Cd5	Cd5	53.849	1.5338	3	1	2	1	0.973	1.026	1.008	0.95	1.05	1.046	0.949	1.011	1.025	0.43508
P13439	Uridine 5'-monophosphate synthase OS=Mus musculus OX=10090 GN=Umps	Umps	52.292	27.723	23.1	12	14	12	0.973	0.995	1.002	1.074	0.996	1.03	1.013	1.013	1.002	0.91154
P13595	Neural cell adhesion molecule 1 OS=Mus musculus OX=10090 GN=Ncam1	Ncam1	119.43	323.31	41.1	43	196	43	0.966	0.963	0.975	0.92	1.032	1.065	1.053	1.026	1.092	0.00132202
P13707	Glycerol-3-phosphate dehydrogenase [NAD(+)], cytoplasmic OS=Mus musculus OX=10090 GN=Gpd1	Gpd1	37.572	18.359	28.7	11	12	9	0.933	0.95	0.958	1.092	0.967	1.032	1.065	0.988	1.03	0.48768
P13864	DNA (cytosine-5)-methyltransferase 1 OS=Mus musculus OX=10090 GN=Dnmt1	Dnmt1	183.19	22.031	5.6	9	9	9	1.029	1.16	1.08	1.003	0.879	1.003	0.885	0.958	0.872	0.023039
P14094	Sodium/potassium-transporting ATPase subunit beta-1 OS=Mus musculus OX=10090 GN=Atp1b1	Atp1b1	35.194	208.65	36.8	15	67	15	1.007	0.984	1.005	1.03	1.017	0.949	0.994	1.022	0.989	0.5806
P14106	Complement C1q subcomponent subunit B OS=Mus musculus OX=10090 GN=C1qb	C1qb	26.717	11.082	13	3	4	3	0.779	0.869	0.887	0.778	1.009	1.187	1.265	1.244	1.42	0.00138443
P14115	60S ribosomal protein L27a OS=Mus musculus OX=10090 GN=Rpl27a	Rpl27a	16.605	34.731	34.5	5	11	5	1.012	0.988	1.104	1.079	0.961	0.972	0.959	0.938	0.916	0.0184609
P14131	40S ribosomal protein S16 OS=Mus musculus OX=10090 GN=Rps16	Rps16	16.445	44.837	74.7	13	29	13	1.05	1.068	1.038	0.968	0.925	0.977	1.027	0.97	0.945	0.11458
P14148	60S ribosomal protein L7 OS=Mus musculus OX=10090 GN=Rpl7	Rpl7	31.419	113	37.4	14	24	14	1.012	0.913	1.063	1.037	0.837	0.994	1.164	0.952	0.981	0.75362
P14152	Malate dehydrogenase, cytoplasmic OS=Mus musculus OX=10090 GN=Mdh1	Mdh1	36.511	168.36	45.5	17	61	17	1.006	0.971	0.983	1.03	1.004	0.993	1.008	1.051	1.017	0.397
P14206	40S ribosomal protein SA OS=Mus musculus OX=10090 GN=Rpsa	Rpsa	32.838	129.35	44.4	10	29	10	1.059	1.041	1.032	1.007	0.95	0.999	0.962	0.936	0.929	0.0056762
P14211	Calreticulin OS=Mus musculus OX=10090 GN=Calr	Calr	47.994	242.34	55.5	23	81	23	1.076	1.052	1.076	1.078	0.95	0.896	0.92	0.953	0.869	0.00010275
P14231	Sodium/potassium-transporting ATPase subunit beta-2 OS=Mus musculus OX=10090 GN=Atp1b2	Atp1b2	33.344	141.28	39.3	13	38	13	0.937	0.957	0.918	1.084	1.021	1.033	0.993	1.045	1.05	0.23774
P14576	Signal recognition particle 54 kDa protein OS=Mus musculus OX=10090 GN=Srp54	Srp54	55.72	149.44	46.8	21	34	21	0.99	1.004	1.007	1.022	0.993	0.986	0.997	1.001	0.989	0.166496
P14602	Heat shock protein beta-1 OS=Mus musculus OX=10090 GN=Hspb1	Hspb1	23.014	4.3638	12.4	2	2	2	1.077	0.877	0.785	0.995	0.905	0.975	1.045	1.352	1.145	0.2846
P14685	26S proteasome non-ATPase regulatory subunit 3 OS=Mus musculus OX=10090 GN=Psmd3	Psmd3	60.718	113.04	35.7	20	42	20	1.01	1.002	0.997	1.002	0.989	0.999	0.998	0.996	0.993	0.084318
P14733	Lamin-B1 OS=Mus musculus OX=10090 GN=Lmnb1	Lmnb1	66.785	266.61	53.2	33	83	29	0.942	0.943	0.961	1.106	0.996	1.046	1.024	0.999	1.029	0.48098
P14824	Annexin A6 OS=Mus musculus OX=10090 GN=Anxa6	Anxa6	75.884	235.47	52	36	56	35	1.082	1.08	1.072	1.1	0.933	0.872	0.873	0.973	0.842	0.0080613
P14869	60S acidic ribosomal protein P0 OS=Mus musculus OX=10090 GN=Rplp0	Rplp0	34.216	77.298	38.5	9	26	9	1.042	1.038	1.021	1.04	0.997	0.952	0.939	1	0.939	0.0089602
P14873	Microtubule-associated protein 1B OS=Mus musculus OX=10090 GN=Map1b	Map1b	270.25	323.31	44.5	98	335	96	1.039	1.019	1.032	0.946	1.021	0.978	0.981	0.975	0.98	0.4454
P14901	Heme oxygenase 1 OS=Mus musculus OX=10090 GN=Hmox1	Hmox1	32.928	10.763	5.9	1	1	1	1.211	0.861	0.97	1.109	0.971	0.971	1.021	0.897	0.93	0.44264
P15105	Glutamine synthetase OS=Mus musculus OX=10090 GN=Glul	Glul	42.119	174.88	56.6	19	74	19	0.915	0.828	0.937	0.848	1.117	1.099	1.177	1.095	1.272	0.00039521
P15116	Cadherin-2 OS=Mus musculus OX=10090 GN=Cdh2	Cdh2	99.795	172.72	25.3	15	30	14	0.988	0.997	0.967	0.984	0.996	1.021	1.028	1.006	1.029	0.023999
P15208	Insulin receptor OS=Mus musculus OX=10090 GN=Insr	Insr	155.61	34.586	9	13	14	11	0.971	0.958	0.944	0.976	1.041	1.046	1.07	1.007	1.082	0.00168299
P15209	BDNF/NT-3 growth factors receptor OS=Mus musculus OX=10090 GN=Ntrk2	Ntrk2	92.132	122.77	20.5	13	24	8	1.078	0.99	0.967	0.921	1.069	1.022	1.014	0.997	1.037	0.33864
P15327	Bisphosphoglycerate mutase OS=Mus musculus OX=10090 GN=Bpgm	Bpgm	29.978	39.663	25.9	6	8	6	0.962	1.018	0.994	1.094	1.001	1.005	1.055	0.984	0.994	0.8805
P15331	Peripherin OS=Mus musculus OX=10090 GN=Prph	Prph	54.267	14.741	19.6	10	11	7	0.837	0.701	0.827	1.579	1.012	1.038	0.962	1.06	1.032	0.67384
P15379	CD44 antigen OS=Mus musculus OX=10090 GN=Cd44	Cd44	85.616	5.0666	3	2	2	2
P15388	Potassium voltage-gated channel subfamily C member 1 OS=Mus musculus OX=10090 GN=Kcnc1	Kcnc1	57.928	4.1256	5.3	3	3	3	0.91	1.449	0.847	0.921	1.003	1.123	0.891	0.904	0.95	0.82248
P15508	Spectrin beta chain, erythrocytic OS=Mus musculus OX=10090 GN=Sptb	Sptb	245.25	101.76	17.2	34	54	27	1.036	0.928	0.971	1.068	0.968	0.989	0.979	0.995	0.982	0.64
P15532	Nucleoside diphosphate kinase A OS=Mus musculus OX=10090 GN=Nme1	Nme1	17.208	80.718	83.6	13	51	7	1.012	0.988	1.009	0.951	0.995	1.052	0.978	1.025	1.023	0.33934
P15626	Glutathione S-transferase Mu 2 OS=Mus musculus OX=10090 GN=Gstm2	Gstm2	25.716	15.827	52.3	11	18	4	1.034	0.894	1.001	0.955	0.88	1.086	1.027	0.986	1.024	0.69176
P15864	Histone H1.2 OS=Mus musculus OX=10090 GN=Hist1h1c	Hist1h1c	21.266	2.3106	24.1	6	11	1
P16014	Secretogranin-1 OS=Mus musculus OX=10090 GN=Chgb	Chgb	77.968	9.7891	5	3	3	3	1.057	1.173	1.075	0.93	1.045	0.895	0.948	0.892	0.893	0.112638
P16045	Galectin-1 OS=Mus musculus OX=10090 GN=Lgals1	Lgals1	14.866	19.198	43.7	5	9	5	1.126	1.015	1.064	1.18	0.893	0.896	0.908	0.966	0.835	0.0031444
P16054	Protein kinase C epsilon type OS=Mus musculus OX=10090 GN=Prkce	Prkce	83.56	211.54	44.2	30	62	27	1.016	1	1.033	0.868	1.022	1.01	1.067	1.016	1.051	0.2655
P16056	Hepatocyte growth factor receptor OS=Mus musculus OX=10090 GN=Met	Met	153.55	37.403	8.6	11	12	10	1.087	1.045	1.106	0.759	1.077	0.991	1.081	0.925	1.019	0.77974
P16125	L-lactate dehydrogenase B chain OS=Mus musculus OX=10090 GN=Ldhb	Ldhb	36.572	141.57	41	13	57	11	1.001	0.942	1.002	1.09	1.006	0.982	0.98	0.998	0.983	0.63862
P16254	Signal recognition particle 14 kDa protein OS=Mus musculus OX=10090 GN=Srp14	Srp14	12.51	5.0916	24.5	2	2	2	1.073	0.987	1.089	1.031	0.922	1.019	1.052	0.846	0.918	0.155843
P16283	Anion exchange protein 3 OS=Mus musculus OX=10090 GN=Slc4a3	Slc4a3	135.37	1.572	0.7	1	1	1
P16330	2',3'-cyclic-nucleotide 3'-phosphodiesterase OS=Mus musculus OX=10090 GN=Cnp	Cnp	47.123	160.97	39.3	19	37	19	0.782	0.986	0.845	1.823	0.977	0.87	0.772	0.967	0.808	0.46238
P16332	Methylmalonyl-CoA mutase, mitochondrial OS=Mus musculus OX=10090 GN=Mut	Mut	82.843	46.27	18.2	12	17	12	0.985	0.994	0.965	1.125	0.988	1.002	0.997	0.938	0.965	0.39752
P16390	Potassium voltage-gated channel subfamily A member 3 OS=Mus musculus OX=10090 GN=Kcna3	Kcna3	58.563	2.9034	1.7	1	1	1	0.925	0.962	0.955	1.124	1.068	1.035	0.931	1.015	1.021	0.68564
P16406	Glutamyl aminopeptidase OS=Mus musculus OX=10090 GN=Enpep	Enpep	107.96	3.2893	1.1	1	1	1
P16460	Argininosuccinate synthase OS=Mus musculus OX=10090 GN=Ass1	Ass1	46.584	53.134	26.9	13	16	13	1.011	1.11	1.013	1.076	0.974	0.926	0.9	0.976	0.897	0.0118584
P16546	Spectrin alpha chain, non-erythrocytic 1 OS=Mus musculus OX=10090 GN=Sptan1	Sptan1	284.59	323.31	63.8	164	469	163	1.004	1.012	1.012	0.983	1.003	0.983	1.003	1	0.995	0.53944
P16675	Lysosomal protective protein OS=Mus musculus OX=10090 GN=Ctsa	Ctsa	53.844	34.168	12.4	5	8	5	0.993	0.973	0.957	0.97	1.012	1.005	1.076	1.044	1.063	0.0132986
P16858	Glyceraldehyde-3-phosphate dehydrogenase OS=Mus musculus OX=10090 GN=Gapdh	Gapdh	35.81	323.31	63.1	21	163	21	0.993	0.959	0.972	1.048	0.996	1.012	1.018	1.011	1.016	0.46462
P16951	Cyclic AMP-dependent transcription factor ATF-2 OS=Mus musculus OX=10090 GN=Atf2	Atf2	52.297	9.0664	5.7	2	2	2
P17047	Lysosome-associated membrane glycoprotein 2 OS=Mus musculus OX=10090 GN=Lamp2	Lamp2	45.681	7.8141	6.3	3	3	3	1.082	0.874	0.963	1.034	0.897	1.068	0.977	1.115	1.026	0.71498
P17095	High mobility group protein HMG-I/HMG-Y OS=Mus musculus OX=10090 GN=Hmga1	Hmga1	11.614	7.3071	23.4	4	5	4	0.984	0.946	0.892	0.893	1.087	1.181	1.113	0.947	1.165	0.0286
P17141	Zinc finger protein 37 OS=Mus musculus OX=10090 GN=Zfp37	Zfp37	67.226	7.0795	1.9	1	1	1
P17156	Heat shock-related 70 kDa protein 2 OS=Mus musculus OX=10090 GN=Hspa2	Hspa2	69.641	87.144	47.4	30	103	13	1.015	0.96	0.944	1.134	1.001	0.927	1.019	1.022	0.979	0.70038
P17182	Alpha-enolase OS=Mus musculus OX=10090 GN=Eno1	Eno1	47.14	223.92	57.1	22	108	19	1.028	1.008	1.025	1.076	0.962	0.956	0.965	0.968	0.931	0.0152633
P17183	Gamma-enolase OS=Mus musculus OX=10090 GN=Eno2	Eno2	47.296	218.71	45.4	14	63	11	0.968	1.046	0.986	1.088	1.001	0.927	0.954	1.018	0.954	0.2244
P17225	Polypyrimidine tract-binding protein 1 OS=Mus musculus OX=10090 GN=Ptbp1	Ptbp1	56.477	33.299	9.3	5	9	3	1.019	1.015	0.899	1.051	0.965	1.019	0.998	0.935	0.983	0.7026
P17426	AP-2 complex subunit alpha-1 OS=Mus musculus OX=10090 GN=Ap2a1	Ap2a1	107.66	323.31	48.9	47	120	35	1.021	0.999	0.997	0.974	1.012	0.982	1.003	1.019	1.006	0.63404
P17427	AP-2 complex subunit alpha-2 OS=Mus musculus OX=10090 GN=Ap2a2	Ap2a2	104.02	170.38	39.9	38	98	26	0.998	1.021	1.005	0.979	1.012	0.994	0.986	0.994	0.996	0.69838
P17439	Glucosylceramidase OS=Mus musculus OX=10090 GN=Gba	Gba	57.621	25.864	11.5	5	7	5	0.969	0.897	0.989	0.907	1.021	0.998	1.126	1.074	1.121	0.0194421
P17515	C-X-C motif chemokine 10 OS=Mus musculus OX=10090 GN=Cxcl10	Cxcl10	10.789	-2	9.2	1	1	1	0.873	1.102	1.167	0.99	1.024	0.847	1.017	0.993	0.939	0.47446
P17563	Methanethiol oxidase OS=Mus musculus OX=10090 GN=Selenbp1	Selenbp1	52.513	45.072	29	11	14	11	1.037	0.969	0.958	1.058	1.016	0.999	0.909	1.074	0.994	0.87698
P17665	Cytochrome c oxidase subunit 7C, mitochondrial OS=Mus musculus OX=10090 GN=Cox7c	Cox7c	7.3325	5.709	28.6	2	4	2	0.983	0.962	1.179	0.97	1.05	1.005	0.964	0.891	0.955	0.48838
P17710	Hexokinase-1 OS=Mus musculus OX=10090 GN=Hk1	Hk1	108.3	323.31	45.9	43	101	43	0.99	0.989	0.985	0.988	1.008	0.994	1.013	1.004	1.017	0.0068573
P17742	Peptidyl-prolyl cis-trans isomerase A OS=Mus musculus OX=10090 GN=Ppia	Ppia	17.971	136.81	79.9	14	113	14	0.979	0.93	0.972	0.972	1.015	1	1.041	1.042	1.064	0.007236
P17751	Triosephosphate isomerase OS=Mus musculus OX=10090 GN=Tpi1	Tpi1	32.191	169.83	52.8	15	53	15	1.014	1.025	1.024	1.074	0.995	0.949	0.982	0.981	0.944	0.0129978
P17809	Solute carrier family 2, facilitated glucose transporter member 1 OS=Mus musculus OX=10090 GN=Slc2a1	Slc2a1	53.984	5.1143	3.7	2	3	2	0.812	0.843	0.759	0.917	1.227	1.219	1.233	1.101	1.435	0.00027703
P17918	Proliferating cell nuclear antigen OS=Mus musculus OX=10090 GN=Pcna	Pcna	28.785	32.746	32.6	8	10	8	1.125	1.093	1.131	1.414	0.877	0.76	0.807	0.824	0.686	0.00138042
P18052	Receptor-type tyrosine-protein phosphatase alpha OS=Mus musculus OX=10090 GN=Ptpra	Ptpra	93.696	79.862	22	15	18	13	1.003	0.944	0.936	1.045	0.969	1.094	0.962	0.991	1.022	0.60104
P18242	Cathepsin D OS=Mus musculus OX=10090 GN=Ctsd	Ctsd	44.953	43.762	32.2	11	26	11	0.973	0.962	0.972	1.022	1.01	1.03	1.038	1.013	1.041	0.035798
P18572	Basigin OS=Mus musculus OX=10090 GN=Bsg	Bsg	42.444	73.968	16.7	6	10	6	1.008	1.004	1.056	1.026	1.017	0.894	0.985	1.004	0.953	0.165403
P18653	Ribosomal protein S6 kinase alpha-1 OS=Mus musculus OX=10090 GN=Rps6ka1	Rps6ka1	81.594	47.418	14.8	9	13	4	0.786	0.983	0.882	1.273	1.134	1.025	0.922	1.018	1.045	0.62512
P18654	Ribosomal protein S6 kinase alpha-3 OS=Mus musculus OX=10090 GN=Rps6ka3	Rps6ka3	83.693	29.812	18.9	12	18	6	0.972	1.05	0.963	1.111	0.941	1.024	0.977	1.006	0.964	0.39184
P18760	Cofilin-1 OS=Mus musculus OX=10090 GN=Cfl1	Cfl1	18.559	142.97	83.7	18	85	16	0.965	0.979	0.959	0.95	1.002	1.058	1.07	1.004	1.073	0.0087422
P18826	Phosphorylase b kinase regulatory subunit alpha, skeletal muscle isoform OS=Mus musculus OX=10090 GN=Phka1	Phka1	138.82	19.198	3.7	5	6	5	0.934	1.047	0.985	0.931	1.024	1	1.037	1.059	1.057	0.109123
P18872	Guanine nucleotide-binding protein G(o) subunit alpha OS=Mus musculus OX=10090 GN=Gnao1	Gnao1	40.084	141.36	41.8	16	100	14	0.991	0.982	0.998	0.956	1.003	0.996	1.039	1.039	1.038	0.043662
P19096	Fatty acid synthase OS=Mus musculus OX=10090 GN=Fasn	Fasn	272.43	323.31	39.2	83	202	83	1.033	1.033	1.04	0.984	0.98	0.981	0.999	0.968	0.96	0.031116
P19137	Laminin subunit alpha-1 OS=Mus musculus OX=10090 GN=Lama1	Lama1	338.17	5.0128	0.5	1	1	1	1.226	1.02	0.817	0.82	0.996	1.074	0.893	1.163	1.063	0.55414
P19157	Glutathione S-transferase P 1 OS=Mus musculus OX=10090 GN=Gstp1	Gstp1	23.609	101.87	35.7	6	22	6	0.99	0.99	0.988	0.977	0.983	1.017	1.01	1.044	1.028	0.078565
P19182	Interferon-related developmental regulator 1 OS=Mus musculus OX=10090 GN=Ifrd1	Ifrd1	49.935	-2	2.4	1	1	1	0.958	0.986	1.035	0.944	0.981	1.065	0.972	1.072	1.043	0.25808
P19221	Prothrombin OS=Mus musculus OX=10090 GN=F2	F2	70.268	9.5044	5	2	2	2	0.895	0.716	0.968	1.299	1.012	0.984	1.12	1.018	1.066	0.54584
P19246	Neurofilament heavy polypeptide OS=Mus musculus OX=10090 GN=Nefh	Nefh	116.99	109.56	19.1	18	25	16	0.852	1.093	0.913	1.85	0.971	0.846	0.687	0.882	0.719	0.18068
P19253	60S ribosomal protein L13a OS=Mus musculus OX=10090 GN=Rpl13a	Rpl13a	23.464	31.271	40.9	9	17	9	1	1.055	1.11	1.02	0.93	0.996	0.964	0.923	0.911	0.0181177
P19258	Protein Mpv17 OS=Mus musculus OX=10090 GN=Mpv17	Mpv17	19.686	4.5229	11.4	2	2	2	0.872	1.039	1.045	0.794	1.066	1.235	1.058	0.911	1.139	0.20426
P19324	Serpin H1 OS=Mus musculus OX=10090 GN=Serpinh1	Serpinh1	46.533	121.17	38.4	13	20	13	1.154	1.114	1.129	1.259	0.864	0.843	0.808	0.882	0.73	8.0306e-05
P19426	Negative elongation factor E OS=Mus musculus OX=10090 GN=Nelfe	Nelfe	42.554	6.4252	7.5	2	2	2	0.96	0.918	0.996	1.027	0.949	1.066	1.029	1.07	1.055	0.2017
P19536	Cytochrome c oxidase subunit 5B, mitochondrial OS=Mus musculus OX=10090 GN=Cox5b	Cox5b	13.813	18.231	37.5	5	20	5	0.93	0.999	1.007	1.098	1.012	0.976	0.95	0.998	0.976	0.55166
P19783	Cytochrome c oxidase subunit 4 isoform 1, mitochondrial OS=Mus musculus OX=10090 GN=Cox4i1	Cox4i1	19.53	58.074	50.3	9	26	9	0.988	1.009	0.982	1.053	0.99	0.971	0.997	1.034	0.99	0.6485
P20029	Endoplasmic reticulum chaperone BiP OS=Mus musculus OX=10090 GN=Hspa5	Hspa5	72.421	287.45	47	34	133	31	1.051	1.044	1.048	1.078	0.953	0.937	0.921	0.967	0.895	0.000135013
P20060	Beta-hexosaminidase subunit beta OS=Mus musculus OX=10090 GN=Hexb	Hexb	61.115	65.096	20.9	15	20	15	0.897	0.932	1.012	0.977	0.989	0.997	1.076	1.147	1.102	0.069538
P20108	Thioredoxin-dependent peroxide reductase, mitochondrial OS=Mus musculus OX=10090 GN=Prdx3	Prdx3	28.127	64.187	36.2	7	23	7	1.041	0.947	1.029	1.039	1.004	0.945	0.983	0.988	0.966	0.24494
P20152	Vimentin OS=Mus musculus OX=10090 GN=Vim	Vim	53.687	234.97	59.2	30	74	23	0.981	0.953	0.962	1.04	1.01	1.039	1.005	1.025	1.036	0.135543
P20263	POU domain, class 5, transcription factor 1 OS=Mus musculus OX=10090 GN=Pou5f1	Pou5f1	38.216	-2	2.6	1	1	1
P20352	Tissue factor OS=Mus musculus OX=10090 GN=F3	F3	32.935	8.0935	11.2	3	3	3
P20357	Microtubule-associated protein 2 OS=Mus musculus OX=10090 GN=Map2	Map2	199.13	323.31	55.7	95	292	95	0.989	0.975	0.999	0.932	1.022	1.027	1.039	1.037	1.059	0.0107421
P20444	Protein kinase C alpha type OS=Mus musculus OX=10090 GN=Prkca	Prkca	76.851	30.857	28.7	19	37	10	0.996	1.012	1.021	0.903	1.056	0.985	1.015	1.005	1.033	0.33904
P20917	Myelin-associated glycoprotein OS=Mus musculus OX=10090 GN=Mag	Mag	69.259	6.997	5.4	3	3	3	0.621	0.956	0.763	2.625	0.888	0.796	0.569	0.846	0.624	0.38662
P20918	Plasminogen OS=Mus musculus OX=10090 GN=Plg	Plg	90.807	31.42	7.6	5	5	5	1.094	0.936	1.066	1.194	1.05	1.027	0.84	0.804	0.867	0.137161
P21107	Tropomyosin alpha-3 chain OS=Mus musculus OX=10090 GN=Tpm3	Tpm3	32.994	26.627	28.1	11	7	4	0.852	0.897	1.054	1.068	0.993	1.047	1.019	1.109	1.077	0.25322
P21126	Ubiquitin-like protein 4A OS=Mus musculus OX=10090 GN=Ubl4a	Ubl4a	17.8	28.213	43.9	6	11	6	1.01	0.986	1.026	0.998	0.999	0.943	0.99	1.05	0.991	0.6831
P21271	Unconventional myosin-Vb OS=Mus musculus OX=10090 GN=Myo5b	Myo5b	210.57	6.1874	4.3	10	17	2	0.97	0.976	1.034	0.823	0.975	1.045	0.995	1.188	1.105	0.179542
P21278	Guanine nucleotide-binding protein subunit alpha-11 OS=Mus musculus OX=10090 GN=Gna11	Gna11	42.024	90.817	50.7	17	37	12	1.003	0.945	0.999	0.932	1.009	1.044	1.049	1.008	1.06	0.036339
P21279	Guanine nucleotide-binding protein G(q) subunit alpha OS=Mus musculus OX=10090 GN=Gnaq	Gnaq	42.158	80.792	48.7	15	43	10	1.021	0.985	0.991	0.956	1.009	1.044	1.045	1.01	1.039	0.060145
P21300	Aldose reductase-related protein 1 OS=Mus musculus OX=10090 GN=Akr1b7	Akr1b7	35.988	3.1464	2.8	1	1	1	0.969	0.956	0.96	1.13	1.057	1.018	0.918	1.006	0.996	0.95738
P21447	Multidrug resistance protein 1A OS=Mus musculus OX=10090 GN=Abcb1a	Abcb1a	140.64	23.363	6.3	7	8	7	0.936	0.927	1.001	0.974	1.118	1.002	0.99	1.056	1.085	0.049019
P21460	Cystatin-C OS=Mus musculus OX=10090 GN=Cst3	Cst3	15.531	42.781	41.4	5	9	5	0.916	0.981	0.855	0.859	1.022	1.178	1.104	1.026	1.199	0.0081642
P21614	Vitamin D-binding protein OS=Mus musculus OX=10090 GN=Gc	Gc	53.6	3.6652	2.1	1	1	1	1.434	1.137	1.29	1.305	0.775	0.736	0.596	0.733	0.55	0.00020306
P21619	Lamin-B2 OS=Mus musculus OX=10090 GN=Lmnb2	Lmnb2	67.317	123.49	46.1	25	42	21	0.939	0.962	0.971	1.035	1.015	1.071	0.997	1.029	1.052	0.092643
P21661	Neuroendocrine convertase 2 OS=Mus musculus OX=10090 GN=Pcsk2	Pcsk2	70.785	26.409	9.1	5	7	5	1.015	0.912	0.941	0.909	1.023	1.012	1.05	1.093	1.106	0.016582
P21765	Epididymal secretory glutathione peroxidase OS=Mus musculus OX=10090 GN=Gpx5	Gpx5	25.392	2.2645	5.4	1	1	1	1.203	0.908	1.162	0.831	1.012	1.011	0.893	0.972	0.947	0.66896
P21836	Acetylcholinesterase OS=Mus musculus OX=10090 GN=Ache	Ache	68.168	19.164	12.4	6	6	6	0.81	0.977	1.097	1.093	0.773	1.11	0.94	1.176	1.006	0.99938
P21956	Lactadherin OS=Mus musculus OX=10090 GN=Mfge8	Mfge8	51.24	6.2734	3.9	1	1	1
P21981	Protein-glutamine gamma-glutamyltransferase 2 OS=Mus musculus OX=10090 GN=Tgm2	Tgm2	77.06	43.123	12.1	7	7	7	1.024	0.923	0.923	0.859	1.147	1.077	0.894	1.151	1.145	0.106004
P21995	Embigin OS=Mus musculus OX=10090 GN=Emb	Emb	37.064	2.4556	2.7	1	1	1
P22315	Ferrochelatase, mitochondrial OS=Mus musculus OX=10090 GN=Fech	Fech	47.13	38.864	28.8	10	13	10	0.984	1.022	1.054	0.979	1.05	0.987	0.981	1.021	1	0.99752
P22599	Alpha-1-antitrypsin 1-2 OS=Mus musculus OX=10090 GN=Serpina1b	Serpina1b	45.974	25.769	19.9	8	13	3	1.032	0.925	0.958	1.299	0.968	1.062	0.9	0.879	0.904	0.32002
P22682	E3 ubiquitin-protein ligase CBL OS=Mus musculus OX=10090 GN=Cbl	Cbl	100.56	76.885	20.3	15	20	12	0.994	1.015	1.013	1.052	0.985	0.984	0.943	0.994	0.959	0.045245
P22723	Gamma-aminobutyric acid receptor subunit gamma-2 OS=Mus musculus OX=10090 GN=Gabrg2	Gabrg2	55.098	11.028	8	4	7	3	1.052	1.011	1.017	1	1.031	0.937	1.041	0.993	0.981	0.4755
P22892	AP-1 complex subunit gamma-1 OS=Mus musculus OX=10090 GN=Ap1g1	Ap1g1	91.349	132.02	24.6	21	38	21	1.011	1.026	0.977	0.936	0.951	1.01	1.006	1.002	1.005	0.84338
P22907	Porphobilinogen deaminase OS=Mus musculus OX=10090 GN=Hmbs	Hmbs	39.344	31.718	21.9	8	10	8	1.081	0.939	1.015	1.07	0.938	1	0.939	0.978	0.939	0.136355
P22935	Cellular retinoic acid-binding protein 2 OS=Mus musculus OX=10090 GN=Crabp2	Crabp2	15.746	5.1579	18.1	3	3	2	1.181	1.036	1.015	1.032	0.963	0.978	0.868	0.94	0.879	0.027022
P23116	Eukaryotic translation initiation factor 3 subunit A OS=Mus musculus OX=10090 GN=Eif3a	Eif3a	161.93	252.06	39.1	59	96	59	1.034	0.997	0.997	0.984	1.006	1.018	0.997	0.978	0.997	0.82292
P23198	Chromobox protein homolog 3 OS=Mus musculus OX=10090 GN=Cbx3	Cbx3	20.855	51.301	36.6	6	11	5	0.932	1.053	1.014	1.059	1.018	1.044	1.012	1.018	1.008	0.77296
P23242	Gap junction alpha-1 protein OS=Mus musculus OX=10090 GN=Gja1	Gja1	43.004	24.745	9.9	3	4	3	0.947	0.834	0.904	0.894	1.082	1.14	1.055	1.171	1.243	0.00085771
P23249	Putative helicase MOV-10 OS=Mus musculus OX=10090 GN=Mov10	Mov10	113.58	1.5987	1.4	1	1	1
P23298	Protein kinase C eta type OS=Mus musculus OX=10090 GN=Prkch	Prkch	77.918	2.2377	5.9	4	11	1
P23475	X-ray repair cross-complementing protein 6 OS=Mus musculus OX=10090 GN=Xrcc6	Xrcc6	69.483	26.75	7.1	5	7	5	1.021	0.926	0.964	1.095	0.963	0.986	1.005	1.023	0.993	0.89122
P23492	Purine nucleoside phosphorylase OS=Mus musculus OX=10090 GN=Pnp	Pnp	32.277	48.358	36	9	17	9	1.116	1.032	1.071	1.077	0.892	0.914	0.931	1.044	0.88	0.0150992
P23506	Protein-L-isoaspartate(D-aspartate) O-methyltransferase OS=Mus musculus OX=10090 GN=Pcmt1	Pcmt1	24.634	78.197	32.2	6	15	6	1.029	1.021	1.009	1.062	0.991	0.961	0.983	0.982	0.95	0.0073981
P23591	GDP-L-fucose synthase OS=Mus musculus OX=10090 GN=Tsta3	Tsta3	35.877	58.526	24.3	7	8	7	0.987	1.001	1.001	0.968	1.01	1.039	1.017	0.999	1.027	0.05722
P23708	Nuclear transcription factor Y subunit alpha OS=Mus musculus OX=10090 GN=Nfya	Nfya	36.778	3.0231	5.5	1	1	1
P23780	Beta-galactosidase OS=Mus musculus OX=10090 GN=Glb1	Glb1	73.12	23.905	11.9	6	6	6	1.053	0.971	0.926	0.844	1.125	1.003	1.009	1.054	1.105	0.104963
P23818	Glutamate receptor 1 OS=Mus musculus OX=10090 GN=Gria1	Gria1	101.57	81.105	27.9	23	38	18	1	0.994	0.994	0.916	1.014	0.981	1.057	1.045	1.049	0.120718
P23819	Glutamate receptor 2 OS=Mus musculus OX=10090 GN=Gria2	Gria2	98.661	281.32	43.3	32	55	25	0.992	0.945	1.052	0.936	0.999	0.996	1.061	1.017	1.038	0.26154
P23953	Carboxylesterase 1C OS=Mus musculus OX=10090 GN=Ces1c	Ces1c	61.055	16.674	11	6	7	6	1.084	0.901	1.014	1.581	0.824	0.825	0.937	0.765	0.732	0.063703
P24270	Catalase OS=Mus musculus OX=10090 GN=Cat	Cat	59.795	196.19	43.3	22	39	22	1.023	0.969	0.96	1.118	1.016	1.019	0.936	0.948	0.963	0.41074
P24288	Branched-chain-amino-acid aminotransferase, cytosolic OS=Mus musculus OX=10090 GN=Bcat1	Bcat1	42.791	60.384	28.5	8	13	8	1.033	0.94	1.034	1.088	1.006	0.977	0.987	0.969	0.962	0.27884
P24369	Peptidyl-prolyl cis-trans isomerase B OS=Mus musculus OX=10090 GN=Ppib	Ppib	23.713	63.027	47.7	12	32	12	1.067	1.057	1.016	1.101	0.969	0.925	0.95	0.949	0.894	0.00112004
P24472	Glutathione S-transferase A4 OS=Mus musculus OX=10090 GN=Gsta4	Gsta4	25.564	16.923	24.8	6	8	6	1.009	0.944	0.965	1.108	0.989	1.012	1.006	0.989	0.993	0.8858
P24527	Leukotriene A-4 hydrolase OS=Mus musculus OX=10090 GN=Lta4h	Lta4h	69.05	214.39	49.3	25	43	25	0.999	0.971	0.981	1.007	1.012	1.014	1.023	1.033	1.031	0.0177371
P24529	Tyrosine 3-monooxygenase OS=Mus musculus OX=10090 GN=Th	Th	55.992	35.026	24.3	12	14	12	0.945	0.959	0.949	1.084	1.005	1.041	1.108	0.984	1.051	0.27398
P24547	Inosine-5'-monophosphate dehydrogenase 2 OS=Mus musculus OX=10090 GN=Impdh2	Impdh2	55.814	136.16	37	16	22	14	1.026	1.044	1.075	1.123	0.942	0.96	0.913	0.927	0.877	0.0011215
P24549	Retinal dehydrogenase 1 OS=Mus musculus OX=10090 GN=Aldh1a1	Aldh1a1	54.467	53.214	22	12	22	10	0.985	0.946	0.949	1.027	1.048	1.021	1.049	0.953	1.042	0.21658
P24638	Lysosomal acid phosphatase OS=Mus musculus OX=10090 GN=Acp2	Acp2	48.508	10.924	8.3	3	4	3	0.768	0.964	1.121	0.976	0.933	1.09	1.041	1.122	1.093	0.31932
P24668	Cation-dependent mannose-6-phosphate receptor OS=Mus musculus OX=10090 GN=M6pr	M6pr	31.172	32.341	25.5	8	12	8	1.011	1.03	1.008	1.016	0.936	1	1.004	0.97	0.962	0.059881
P24788	Cyclin-dependent kinase 11B OS=Mus musculus OX=10090 GN=Cdk11b	Cdk11b	91.512	29.555	11.6	9	10	9	0.995	0.973	0.948	0.98	0.979	1.113	1.06	0.968	1.057	0.168404
P25206	DNA replication licensing factor MCM3 OS=Mus musculus OX=10090 GN=Mcm3	Mcm3	91.545	26.37	4.2	2	2	2
P25233	Necdin OS=Mus musculus OX=10090 GN=Ndn	Ndn	36.831	10.195	15.1	4	5	4	0.929	1.025	1.029	1.138	0.965	0.867	1.047	1.018	0.946	0.37812
P25444	40S ribosomal protein S2 OS=Mus musculus OX=10090 GN=Rps2	Rps2	31.231	75.131	47.8	16	30	16	1.085	1.078	1.079	0.973	0.943	0.952	0.97	0.915	0.897	0.0096986
P25785	Metalloproteinase inhibitor 2 OS=Mus musculus OX=10090 GN=Timp2	Timp2	24.328	21.143	10.5	3	4	3	1.032	0.979	0.941	0.948	0.957	1.126	0.984	1.052	1.056	0.25122
P25911	Tyrosine-protein kinase Lyn OS=Mus musculus OX=10090 GN=Lyn	Lyn	58.812	7.7527	6.1	3	5	2	1.033	0.882	0.996	0.846	0.982	0.991	1.041	1.23	1.13	0.137983
P25916	Polycomb complex protein BMI-1 OS=Mus musculus OX=10090 GN=Bmi1	Bmi1	36.707	1.783	2.5	1	1	1
P25976	Nucleolar transcription factor 1 OS=Mus musculus OX=10090 GN=Ubtf	Ubtf	89.508	41.903	14.5	11	14	11	1.006	0.949	1.038	1.039	0.964	1.031	1.024	0.919	0.977	0.5122
P26039	Talin-1 OS=Mus musculus OX=10090 GN=Tln1	Tln1	269.82	323.31	29.5	62	79	51	1.015	0.998	0.999	1.047	1.02	0.929	0.968	1.028	0.972	0.30956
P26040	Ezrin OS=Mus musculus OX=10090 GN=Ezr	Ezr	69.406	61.003	33.4	25	53	16	0.97	0.98	0.966	0.996	1.03	1.034	1.068	1.008	1.058	0.0062626
P26041	Moesin OS=Mus musculus OX=10090 GN=Msn	Msn	67.766	85.25	34.3	27	45	18	0.993	0.95	1.016	1.054	0.992	0.969	1.009	1.006	0.991	0.72578
P26043	Radixin OS=Mus musculus OX=10090 GN=Rdx	Rdx	68.542	65.984	34	26	47	17	1.056	1.015	1.004	1.142	0.947	0.955	0.905	0.965	0.894	0.0143385
P26048	Gamma-aminobutyric acid receptor subunit alpha-2 OS=Mus musculus OX=10090 GN=Gabra2	Gabra2	51.138	93.192	22.6	11	16	4	1.018	1.009	1.027	0.91	0.987	0.979	1.001	1.031	1.009	0.7652
P26049	Gamma-aminobutyric acid receptor subunit alpha-3 OS=Mus musculus OX=10090 GN=Gabra3	Gabra3	55.397	61.343	34.1	15	23	13	0.993	0.962	0.99	0.945	1.035	1.02	1.033	1.019	1.056	0.0049039
P26231	Catenin alpha-1 OS=Mus musculus OX=10090 GN=Ctnna1	Ctnna1	100.11	124.27	27.9	21	32	13	1.162	1.004	1.013	1.037	0.93	0.937	0.956	1.024	0.912	0.065603
P26323	Friend leukemia integration 1 transcription factor OS=Mus musculus OX=10090 GN=Fli1	Fli1	51.001	-2	2.9	1	1	1
P26339	Chromogranin-A OS=Mus musculus OX=10090 GN=Chga	Chga	51.789	21.604	9.9	4	7	4	1.006	1.025	1.006	1.093	1.04	0.943	0.894	1.009	0.941	0.165285
P26350	Prothymosin alpha OS=Mus musculus OX=10090 GN=Ptma	Ptma	12.254	5.3261	13.5	1	1	1
P26369	Splicing factor U2AF 65 kDa subunit OS=Mus musculus OX=10090 GN=U2af2	U2af2	53.516	69.33	22.5	9	22	9	0.995	0.932	0.97	1.012	1.003	1.033	0.982	0.995	1.027	0.25022
P26443	Glutamate dehydrogenase 1, mitochondrial OS=Mus musculus OX=10090 GN=Glud1	Glud1	61.336	236.13	49.6	27	87	27	0.951	0.948	0.999	1.113	1.048	1.019	0.959	0.993	1.002	0.9344
P26450	Phosphatidylinositol 3-kinase regulatory subunit alpha OS=Mus musculus OX=10090 GN=Pik3r1	Pik3r1	83.516	57.836	18.5	15	21	12	0.983	0.97	0.955	0.928	1.004	1.022	1.098	0.996	1.074	0.031683
P26516	26S proteasome non-ATPase regulatory subunit 7 OS=Mus musculus OX=10090 GN=Psmd7	Psmd7	36.539	24.372	23.7	8	18	8	0.995	1.007	0.995	1.048	0.949	1.029	1.031	0.997	0.99	0.67754
P26618	Platelet-derived growth factor receptor alpha OS=Mus musculus OX=10090 GN=Pdgfra	Pdgfra	122.68	7.8573	2	2	2	2	0.988	1.047	0.926	0.946	1.054	0.922	0.974	1.154	1.05	0.43514
P26638	Serine--tRNA ligase, cytoplasmic OS=Mus musculus OX=10090 GN=Sars	Sars	58.388	101.88	42.8	20	31	20	1.005	0.989	0.987	1.033	0.994	1.027	0.995	1	1	0.9662
P26645	Myristoylated alanine-rich C-kinase substrate OS=Mus musculus OX=10090 GN=Marcks	Marcks	29.661	199.96	37.2	9	31	9	1.089	1.077	0.991	1.003	1.136	0.913	0.948	0.857	0.926	0.25902
P26883	Peptidyl-prolyl cis-trans isomerase FKBP1A OS=Mus musculus OX=10090 GN=Fkbp1a	Fkbp1a	11.922	47.696	41.7	3	15	3	0.986	0.966	1.025	1.016	0.987	1.013	0.982	1.007	0.999	0.9604
P27038	Activin receptor type-2A OS=Mus musculus OX=10090 GN=Acvr2a	Acvr2a	57.889	19.992	7.8	3	3	3	0.912	0.973	0.961	1.041	0.918	1.135	1.017	1.067	1.064	0.2925
P27046	Alpha-mannosidase 2 OS=Mus musculus OX=10090 GN=Man2a1	Man2a1	131.63	3.1597	1.7	2	2	1
P27048	Small nuclear ribonucleoprotein-associated protein B OS=Mus musculus OX=10090 GN=Snrpb	Snrpb	23.656	23.397	25.1	6	11	6	0.882	0.984	1.009	0.969	0.978	1.006	1.132	0.984	1.067	0.20608
P27545	Ceramide synthase 1 OS=Mus musculus OX=10090 GN=Cers1	Cers1	40.1	13.512	8.6	2	4	2	1.072	1.083	1.145	0.986	1.159	0.813	0.85	0.891	0.866	0.125083
P27546	Microtubule-associated protein 4 OS=Mus musculus OX=10090 GN=Map4	Map4	117.43	322.23	40.7	39	79	39	0.981	0.954	0.985	0.873	1.067	1.09	1.086	0.961	1.108	0.045897
P27600	Guanine nucleotide-binding protein subunit alpha-12 OS=Mus musculus OX=10090 GN=Gna12	Gna12	44.095	7.2083	9	4	6	3	1.042	1.045	1.039	1.01	0.988	0.953	0.981	0.956	0.938	0.0017231
P27601	Guanine nucleotide-binding protein subunit alpha-13 OS=Mus musculus OX=10090 GN=Gna13	Gna13	44.054	65.081	38.5	13	19	12	0.933	0.993	0.969	1.013	1.018	1.003	0.994	1.042	1.038	0.115139
P27612	Phospholipase A-2-activating protein OS=Mus musculus OX=10090 GN=Plaa	Plaa	87.22	172.85	37.5	24	37	24	1.024	1.01	1.005	1.008	0.98	0.945	0.962	0.974	0.954	0.00198046
P27641	X-ray repair cross-complementing protein 5 OS=Mus musculus OX=10090 GN=Xrcc5	Xrcc5	83.056	7.5037	3.6	3	3	3	0.989	0.99	0.98	1.107	1.007	0.977	0.965	1.001	0.971	0.399
P27659	60S ribosomal protein L3 OS=Mus musculus OX=10090 GN=Rpl3	Rpl3	46.109	66.937	40.2	19	44	19	0.982	1.114	1.111	1.022	0.953	1.01	0.923	0.882	0.891	0.034657
P27661	Histone H2AX OS=Mus musculus OX=10090 GN=H2afx	H2afx	15.142	1.4784	22.4	4	9	2	0.939	1.065	0.923	0.911	1.007	1.225	1.073	0.888	1.092	0.31282
P27671	Ras-specific guanine nucleotide-releasing factor 1 OS=Mus musculus OX=10090 GN=Rasgrf1	Rasgrf1	144.1	57.102	13.2	14	14	12	0.896	0.925	0.972	0.944	1.062	1.124	1.022	1.019	1.131	0.005084
P27773	Protein disulfide-isomerase A3 OS=Mus musculus OX=10090 GN=Pdia3	Pdia3	56.678	282.98	55.2	33	84	33	1.076	1.047	1.066	1.044	0.97	0.919	0.93	0.964	0.894	0.00030057
P28028	Serine/threonine-protein kinase B-raf OS=Mus musculus OX=10090 GN=Braf	Braf	88.779	16.553	16.7	12	14	7	1.044	1.062	1.013	0.976	1.043	0.921	0.935	1.017	0.956	0.25042
P28063	Proteasome subunit beta type-8 OS=Mus musculus OX=10090 GN=Psmb8	Psmb8	30.26	9.589	11.2	3	3	3	0.802	0.813	0.786	0.87	1.076	1.112	1.188	1.365	1.449	0.00066161
P28076	Proteasome subunit beta type-9 OS=Mus musculus OX=10090 GN=Psmb9	Psmb9	23.396	2.6183	4.1	1	1	1
P28184	Metallothionein-3 OS=Mus musculus OX=10090 GN=Mt3	Mt3	7.0092	15.404	35.3	3	5	3	0.943	0.982	1.143	1.008	1.041	0.917	1.02	0.939	0.961	0.48388
P28271	Cytoplasmic aconitate hydratase OS=Mus musculus OX=10090 GN=Aco1	Aco1	98.124	113.36	30.6	28	38	28	0.997	0.998	0.979	1.002	1.011	1.017	0.99	0.991	1.008	0.37548
P28334	5-hydroxytryptamine receptor 1B OS=Mus musculus OX=10090 GN=Htr1b	Htr1b	43.078	2.4543	4.7	1	1	1
P28352	DNA-(apurinic or apyrimidinic site) lyase OS=Mus musculus OX=10090 GN=Apex1	Apex1	35.49	78.492	42	11	13	11	1.009	0.968	0.963	0.922	0.974	1.053	1.091	1.014	1.07	0.070461
P28474	Alcohol dehydrogenase class-3 OS=Mus musculus OX=10090 GN=Adh5	Adh5	39.547	115.35	33.4	11	25	11	0.982	0.988	0.981	0.979	1.03	1.051	1.04	0.983	1.044	0.063021
P28571	Sodium- and chloride-dependent glycine transporter 1 OS=Mus musculus OX=10090 GN=Slc6a9	Slc6a9	76.543	43.635	10.8	6	7	6	0.877	1.052	0.873	1.24	1.048	1.015	0.903	1.018	0.986	0.95512
P28650	Adenylosuccinate synthetase isozyme 1 OS=Mus musculus OX=10090 GN=Adssl1	Adssl1	50.254	3.5678	10.1	4	6	3	0.859	0.995	0.955	1.22	1.074	1.029	0.874	1.013	0.99	0.9609
P28651	Carbonic anhydrase-related protein OS=Mus musculus OX=10090 GN=Ca8	Ca8	33.081	77.333	20.6	4	6	4	0.952	1.015	0.903	2.096	0.779	0.817	0.697	0.793	0.621	0.132504
P28652	Calcium/calmodulin-dependent protein kinase type II subunit beta OS=Mus musculus OX=10090 GN=Camk2b	Camk2b	60.46	205.5	49.8	24	81	15	1.024	1.007	1.032	0.869	1.035	0.984	1.054	1.01	1.038	0.39358
P28656	Nucleosome assembly protein 1-like 1 OS=Mus musculus OX=10090 GN=Nap1l1	Nap1l1	45.345	71.892	19.9	7	17	7	1.055	1.089	1.035	1.104	0.954	0.905	0.878	1.012	0.875	0.0080405
P28658	Ataxin-10 OS=Mus musculus OX=10090 GN=Atxn10	Atxn10	53.706	172.9	38.3	18	40	18	1.058	1.043	1	1.024	0.995	0.983	0.97	0.996	0.956	0.0170195
P28659	CUGBP Elav-like family member 1 OS=Mus musculus OX=10090 GN=Celf1	Celf1	52.107	41.151	21.8	11	14	8	1.015	0.951	1.024	0.968	0.993	1.004	1.042	0.976	1.014	0.54658
P28660	Nck-associated protein 1 OS=Mus musculus OX=10090 GN=Nckap1	Nckap1	128.78	202	34.5	41	91	40	1	1.016	0.992	0.932	1.022	0.99	1.039	1	1.028	0.24458
P28661	Septin-4 OS=Mus musculus OX=10090 GN=Sept4	Sept4	54.935	5.1227	6.7	4	5	2	0.94	0.946	1.065	1.432	1.004	0.772	0.871	0.982	0.828	0.173075
P28663	Beta-soluble NSF attachment protein OS=Mus musculus OX=10090 GN=Napb	Napb	33.557	277.54	62.4	18	48	15	1.007	0.993	0.977	0.991	0.995	1.008	1.013	1.023	1.018	0.080839
P28667	MARCKS-related protein OS=Mus musculus OX=10090 GN=Marcksl1	Marcksl1	20.165	45.566	17.5	3	9	3	1.349	1.278	1.085	0.761	1.212	0.709	0.899	0.676	0.782	0.22592
P28704	Retinoic acid receptor RXR-beta OS=Mus musculus OX=10090 GN=Rxrb	Rxrb	55.865	4.3793	9.4	3	3	3	0.906	0.946	0.978	1.036	1.036	0.969	1.101	1.043	1.073	0.115644
P28738	Kinesin heavy chain isoform 5C OS=Mus musculus OX=10090 GN=Kif5c	Kif5c	109.27	323.31	57	53	104	36	0.995	1.021	1.01	1.008	0.981	0.994	1.024	0.994	0.99	0.36488
P28740	Kinesin-like protein KIF2A OS=Mus musculus OX=10090 GN=Kif2a	Kif2a	79.755	218.9	39.3	25	53	25	1.018	1.005	1.029	0.955	1	0.985	1.02	0.986	0.996	0.84762
P28741	Kinesin-like protein KIF3A OS=Mus musculus OX=10090 GN=Kif3a	Kif3a	80.169	66.167	24.4	18	24	17	1.03	1.045	1.009	0.936	1	1.011	1.032	0.933	0.989	0.75282
P28828	Receptor-type tyrosine-protein phosphatase mu OS=Mus musculus OX=10090 GN=Ptprm	Ptprm	163.65	6.4528	3.2	4	4	3
P28867	Protein kinase C delta type OS=Mus musculus OX=10090 GN=Prkcd	Prkcd	77.546	22.394	13.2	9	9	8	0.902	0.856	0.893	0.981	1.032	1.047	1.07	0.982	1.137	0.0087186
P29319	Ephrin type-A receptor 3 OS=Mus musculus OX=10090 GN=Epha3	Epha3	109.95	6.6043	4	4	4	3	0.979	1.046	1.112	0.938	0.951	1.01	0.939	1.036	0.966	0.47788
P29341	Polyadenylate-binding protein 1 OS=Mus musculus OX=10090 GN=Pabpc1	Pabpc1	70.67	161.45	35.4	23	59	23	1.015	0.997	0.991	1.018	0.976	0.994	1.001	0.976	0.982	0.090959
P29351	Tyrosine-protein phosphatase non-receptor type 6 OS=Mus musculus OX=10090 GN=Ptpn6	Ptpn6	67.558	3.5489	3	2	2	2	0.88	0.803	1.024	1.024	0.984	1.081	1.008	1.199	1.145	0.114119
P29387	Guanine nucleotide-binding protein subunit beta-4 OS=Mus musculus OX=10090 GN=Gnb4	Gnb4	37.379	47.109	29.7	10	38	7	0.947	0.983	0.978	0.939	1.028	1.006	1.085	1.042	1.082	0.0071609
P29391	Ferritin light chain 1 OS=Mus musculus OX=10090 GN=Ftl1	Ftl1	20.802	93.767	55.7	7	18	7	1.022	0.88	0.966	1.08	0.939	1.167	0.935	1.071	1.042	0.59316
P29416	Beta-hexosaminidase subunit alpha OS=Mus musculus OX=10090 GN=Hexa	Hexa	60.612	18.718	5.7	3	4	3	0.966	1.044	1.04	0.966	1.007	1.042	1.004	1.078	1.029	0.34
P29452	Caspase-1 OS=Mus musculus OX=10090 GN=Casp1	Casp1	45.64	9.255	6.7	3	3	3	0.98	0.862	0.967	0.879	0.993	1.077	1.085	1.165	1.171	0.0140648
P29533	Vascular cell adhesion protein 1 OS=Mus musculus OX=10090 GN=Vcam1	Vcam1	81.317	67.852	23.3	16	20	16	0.948	1.012	0.959	0.957	1.012	1.084	1.047	1.068	1.086	0.0075174
P29595	NEDD8 OS=Mus musculus OX=10090 GN=Nedd8	Nedd8	8.9723	11.765	28.4	3	9	3	0.926	0.969	1.012	0.942	1.034	0.996	1.065	1.033	1.072	0.025355
P29699	Alpha-2-HS-glycoprotein OS=Mus musculus OX=10090 GN=Ahsg	Ahsg	37.325	52.821	17.1	4	12	4	1.039	0.935	0.973	1.127	1.04	1.037	0.975	0.936	0.979	0.69548
P29758	Ornithine aminotransferase, mitochondrial OS=Mus musculus OX=10090 GN=Oat	Oat	48.354	120.88	39.2	14	24	14	1.057	1.017	1.033	1.032	0.981	0.985	0.958	0.965	0.94	0.00095578
P29788	Vitronectin OS=Mus musculus OX=10090 GN=Vtn	Vtn	54.848	33.824	6.1	2	2	2	1.239	0.886	0.974	1.094	0.948	0.947	0.948	0.971	0.91	0.3187
P30275	Creatine kinase U-type, mitochondrial OS=Mus musculus OX=10090 GN=Ckmt1	Ckmt1	47.003	194.75	34	14	39	14	1.033	1.036	1.031	1.084	1.006	0.9	0.937	1.007	0.92	0.031798
P30285	Cyclin-dependent kinase 4 OS=Mus musculus OX=10090 GN=Cdk4	Cdk4	33.75	6.783	6.9	2	3	1	0.988	0.983	1.115	1.115	1.04	0.926	0.954	0.89	0.907	0.091921
P30412	Peptidyl-prolyl cis-trans isomerase C OS=Mus musculus OX=10090 GN=Ppic	Ppic	22.794	11.814	16.5	3	4	3	1.257	1.059	1.097	1.269	0.861	0.916	0.737	0.89	0.727	0.0031407
P30416	Peptidyl-prolyl cis-trans isomerase FKBP4 OS=Mus musculus OX=10090 GN=Fkbp4	Fkbp4	51.572	103.71	50.7	24	41	24	1.11	1.082	1.06	1.143	0.929	0.902	0.893	0.925	0.83	6.2109e-05
P30681	High mobility group protein B2 OS=Mus musculus OX=10090 GN=Hmgb2	Hmgb2	24.162	27.433	23.8	6	8	6	1.049	0.963	1.043	1.594	0.907	0.85	0.902	0.752	0.734	0.053859
P30875	Somatostatin receptor type 2 OS=Mus musculus OX=10090 GN=Sstr2	Sstr2	41.221	5.2553	2.7	1	1	1
P30999	Catenin delta-1 OS=Mus musculus OX=10090 GN=Ctnnd1	Ctnnd1	104.92	95.877	30.9	25	30	25	1.032	1.03	1.002	0.901	1.007	0.997	1.005	1.004	1.012	0.7017
P31001	Desmin OS=Mus musculus OX=10090 GN=Des	Des	53.497	1.6629	8.3	5	11	1	1.146	1.015	1.456	1.022	0.932	0.834	0.909	0.685	0.724	0.026921
P31230	Aminoacyl tRNA synthase complex-interacting multifunctional protein 1 OS=Mus musculus OX=10090 GN=Aimp1	Aimp1	33.997	150.35	57.1	12	19	12	1.032	0.986	0.977	1.01	1.034	0.981	1.006	0.962	0.995	0.78638
P31324	cAMP-dependent protein kinase type II-beta regulatory subunit OS=Mus musculus OX=10090 GN=Prkar2b	Prkar2b	46.167	157.15	45.2	17	47	15	0.985	0.977	0.984	0.961	1.006	1.007	1.049	1.027	1.047	0.007258
P31360	POU domain, class 3, transcription factor 2 OS=Mus musculus OX=10090 GN=Pou3f2	Pou3f2	47.148	22.723	5.8	2	2	2	0.803	1.203	0.991	0.785	1.125	0.935	1.012	1.16	1.119	0.30932
P31648	Sodium- and chloride-dependent GABA transporter 1 OS=Mus musculus OX=10090 GN=Slc6a1	Slc6a1	67.001	90.211	15.9	7	11	7	0.995	1.025	0.95	1.019	1.077	0.961	0.972	0.993	1.004	0.92746
P31649	Sodium- and chloride-dependent GABA transporter 2 OS=Mus musculus OX=10090 GN=Slc6a13	Slc6a13	68.284	24.077	4.3	2	4	1
P31650	Sodium- and chloride-dependent GABA transporter 3 OS=Mus musculus OX=10090 GN=Slc6a11	Slc6a11	69.96	87.367	15.3	10	31	9	0.979	1.046	0.968	1.152	1.063	0.978	0.908	0.968	0.945	0.32
P31750	RAC-alpha serine/threonine-protein kinase OS=Mus musculus OX=10090 GN=Akt1	Akt1	55.707	69.127	26	10	17	6	1.001	0.946	0.932	0.952	1.017	1.034	1.071	1.014	1.08	0.0084953
P31786	Acyl-CoA-binding protein OS=Mus musculus OX=10090 GN=Dbi	Dbi	10	48.172	39.1	2	5	2	0.905	1.046	0.869	1.132	0.995	1.071	0.906	1.104	1.031	0.6718
P31938	Dual specificity mitogen-activated protein kinase kinase 1 OS=Mus musculus OX=10090 GN=Map2k1	Map2k1	43.474	77.946	28.2	11	21	6	1.04	0.976	1.012	1.034	1.007	0.942	0.944	1.012	0.961	0.154761
P32020	Non-specific lipid-transfer protein OS=Mus musculus OX=10090 GN=Scp2	Scp2	59.125	59.973	19.6	12	27	12	1.019	0.954	0.961	0.999	1.01	1.027	1.021	1.062	1.048	0.050162
P32037	Solute carrier family 2, facilitated glucose transporter member 3 OS=Mus musculus OX=10090 GN=Slc2a3	Slc2a3	53.478	49.039	12.2	5	11	5	0.922	1.011	1.002	0.958	1.077	1.045	1.007	1.038	1.07	0.03596
P32067	Lupus La protein homolog OS=Mus musculus OX=10090 GN=Ssb	Ssb	47.756	145.94	44.1	22	38	22	1.012	1.045	1.051	0.901	0.975	1.077	1.04	0.941	1.006	0.89542
P32233	Developmentally-regulated GTP-binding protein 1 OS=Mus musculus OX=10090 GN=Drg1	Drg1	40.512	75.768	35.4	12	17	11	1.08	1.023	1.058	1.07	0.948	0.904	0.882	0.959	0.873	0.00103501
P32261	Antithrombin-III OS=Mus musculus OX=10090 GN=Serpinc1	Serpinc1	52.003	15.654	12.3	6	7	6	1.107	1.055	1.023	1.193	0.949	0.874	0.892	0.928	0.832	0.0031167
P32507	Nectin-2 OS=Mus musculus OX=10090 GN=Nectin2	Nectin2	57.317	36.614	15.7	7	9	7	1.086	0.987	0.978	1.005	0.958	1.066	0.99	0.958	0.979	0.56648
P32848	Parvalbumin alpha OS=Mus musculus OX=10090 GN=Pvalb	Pvalb	11.93	24.643	32.7	3	5	3	0.663	0.687	0.682	3.425	0.596	0.778	0.625	0.762	0.506	0.40934
P32883	GTPase KRas OS=Mus musculus OX=10090 GN=Kras	Kras	21.656	26.391	36.5	7	20	4	0.958	0.981	0.996	0.914	1.021	1.023	1.055	0.979	1.059	0.053963
P32921	Tryptophan--tRNA ligase, cytoplasmic OS=Mus musculus OX=10090 GN=Wars	Wars	54.357	171.82	41.2	18	46	18	1.028	1.017	1.03	1.034	1.002	0.961	0.948	0.971	0.945	0.0035753
P33173	Kinesin-like protein KIF1A OS=Mus musculus OX=10090 GN=Kif1a	Kif1a	191.72	274.27	30.7	44	80	30	1.026	1.021	1.039	0.976	0.998	0.974	0.998	0.975	0.971	0.106217
P33175	Kinesin heavy chain isoform 5A OS=Mus musculus OX=10090 GN=Kif5a	Kif5a	117.02	212	39.8	36	59	22	1.025	1.07	1.015	0.99	0.953	0.957	0.945	0.96	0.93	0.022722
P33610	DNA primase large subunit OS=Mus musculus OX=10090 GN=Prim2	Prim2	58.408	6.5516	5	2	2	2
P33622	Apolipoprotein C-III OS=Mus musculus OX=10090 GN=Apoc3	Apoc3	10.982	10.196	27.3	2	2	2	0.929	1.157	1.039	1.32	0.886	1.008	0.909	0.79	0.808	0.06054
P34022	Ran-specific GTPase-activating protein OS=Mus musculus OX=10090 GN=Ranbp1	Ranbp1	23.596	13.355	27.1	5	6	5	0.891	0.932	1.099	1.091	1.033	1.013	0.952	0.973	0.99	0.91006
P34152	Focal adhesion kinase 1 OS=Mus musculus OX=10090 GN=Ptk2	Ptk2	123.54	127.72	18.9	19	21	18	1.033	1.027	1.005	1.018	0.972	0.971	0.974	0.998	0.959	0.003183
P34884	Macrophage migration inhibitory factor OS=Mus musculus OX=10090 GN=Mif	Mif	12.504	72.055	41.7	4	7	4	0.915	1.014	0.982	1.063	0.99	0.945	1.033	1.069	1.016	0.70918
P34914	Bifunctional epoxide hydrolase 2 OS=Mus musculus OX=10090 GN=Ephx2	Ephx2	62.515	17.895	13.4	7	7	7	1.134	1.052	1.045	1.132	0.939	0.881	0.882	0.943	0.835	0.00086183
P35123	Ubiquitin carboxyl-terminal hydrolase 4 OS=Mus musculus OX=10090 GN=Usp4	Usp4	108.34	115.39	21.3	19	26	17	1.029	1.027	0.959	1.004	1.035	1.061	1.082	0.949	1.027	0.46906
P35175	Stefin-1 OS=Mus musculus OX=10090 GN=Stfa1	Stfa1	11.006	1.7066	8.2	1	1	1
P35235	Tyrosine-protein phosphatase non-receptor type 11 OS=Mus musculus OX=10090 GN=Ptpn11	Ptpn11	68.46	118.52	40.9	25	37	25	0.984	1.007	0.971	1.024	0.976	1.027	1.01	1.011	1.01	0.57294
P35276	Ras-related protein Rab-3D OS=Mus musculus OX=10090 GN=Rab3d	Rab3d	24.416	20.91	17.8	4	17	2	1.064	0.993	1.067	1	1.02	0.913	0.977	0.985	0.944	0.10638
P35278	Ras-related protein Rab-5C OS=Mus musculus OX=10090 GN=Rab5c	Rab5c	23.412	112.64	54.2	9	29	6	0.991	1.024	0.983	0.979	1.013	1.022	0.978	1.058	1.024	0.27152
P35279	Ras-related protein Rab-6A OS=Mus musculus OX=10090 GN=Rab6a	Rab6a	23.59	89.178	59.1	12	44	6	0.965	1.005	0.966	1.059	1.013	0.997	0.959	1.006	0.995	0.8631
P35282	Ras-related protein Rab-21 OS=Mus musculus OX=10090 GN=Rab21	Rab21	24.106	28.018	23.4	5	9	5	1.031	1.13	0.883	1.003	1.012	0.948	0.97	1.063	0.987	0.85898
P35283	Ras-related protein Rab-12 OS=Mus musculus OX=10090 GN=Rab12	Rab12	27.328	38.857	47.3	11	15	11	1.001	1.015	1.015	0.965	0.988	1.009	1.053	1.037	1.023	0.27166
P35285	Ras-related protein Rab-22A OS=Mus musculus OX=10090 GN=Rab22a	Rab22a	21.802	12.296	30.4	5	8	3	0.955	0.982	0.947	1.04	1.048	1.016	1.038	0.991	1.043	0.133181
P35288	Ras-related protein Rab-23 OS=Mus musculus OX=10090 GN=Rab23	Rab23	26.678	54.702	31.6	6	8	6	0.966	0.998	0.945	1.008	1.001	1.037	1.022	1.024	1.043	0.044339
P35290	Ras-related protein Rab-24 OS=Mus musculus OX=10090 GN=Rab24	Rab24	23.144	26.051	36.5	6	8	6	0.887	1.019	0.976	1.045	1.036	0.953	1.06	1.096	1.056	0.28724
P35293	Ras-related protein Rab-18 OS=Mus musculus OX=10090 GN=Rab18	Rab18	23.035	87.234	55.8	10	22	10	1.051	1.054	1.021	1.046	0.964	0.951	0.938	0.972	0.917	0.000182141
P35377	Nociceptin receptor OS=Mus musculus OX=10090 GN=Oprl1	Oprl1	40.491	2.5376	3.8	2	2	2	0.901	1	0.96	0.914	1.089	1.08	1.121	0.956	1.125	0.0336
P35436	Glutamate receptor ionotropic, NMDA 2A OS=Mus musculus OX=10090 GN=Grin2a	Grin2a	165.42	6.7521	1.6	2	2	1	1.052	1.012	1.224	0.825	1.175	0.625	1.061	1.01	0.941	0.64754
P35438	Glutamate receptor ionotropic, NMDA 1 OS=Mus musculus OX=10090 GN=Grin1	Grin1	105.48	82.442	20.7	21	28	21	0.961	0.976	1.019	0.96	1.054	0.989	1.009	1.027	1.042	0.080537
P35486	Pyruvate dehydrogenase E1 component subunit alpha, somatic form, mitochondrial OS=Mus musculus OX=10090 GN=Pdha1	Pdha1	43.231	97.803	43.6	18	45	18	1.023	1.001	1.011	1.033	0.987	0.963	0.975	1.018	0.969	0.062744
P35505	Fumarylacetoacetase OS=Mus musculus OX=10090 GN=Fah	Fah	46.175	17.197	16	6	9	6	1.071	0.996	1.017	1.074	0.997	0.908	0.965	0.941	0.917	0.0187818
P35550	rRNA 2'-O-methyltransferase fibrillarin OS=Mus musculus OX=10090 GN=Fbl	Fbl	34.306	93.727	36.7	13	17	12	1	1.003	1.027	1.028	0.949	1.033	1.002	0.957	0.971	0.2114
P35564	Calnexin OS=Mus musculus OX=10090 GN=Canx	Canx	67.277	180.81	43.5	28	66	28	1.046	1.059	1.071	1.052	0.98	0.949	0.946	0.954	0.906	4.2849e-05
P35569	Insulin receptor substrate 1 OS=Mus musculus OX=10090 GN=Irs1	Irs1	130.72	3.0393	2	2	2	2
P35585	AP-1 complex subunit mu-1 OS=Mus musculus OX=10090 GN=Ap1m1	Ap1m1	48.542	72.224	43	15	24	15	0.967	0.998	0.958	1.017	1.02	1.035	1.025	1.033	1.044	0.056341
P35700	Peroxiredoxin-1 OS=Mus musculus OX=10090 GN=Prdx1	Prdx1	22.176	41.997	55.3	12	37	11	0.975	0.945	1.012	0.989	0.982	1	1.051	1.04	1.039	0.128143
P35710	Transcription factor SOX-5 OS=Mus musculus OX=10090 GN=Sox5	Sox5	84.089	3.0916	2.8	2	2	2	0.954	1.05	1.011	0.958	1.05	1.039	1.026	0.93	1.018	0.64372
P35762	CD81 antigen OS=Mus musculus OX=10090 GN=Cd81	Cd81	25.814	65.103	21.2	3	8	3	0.919	0.911	0.941	1.055	0.978	1.049	1.02	1.164	1.101	0.106157
P35802	Neuronal membrane glycoprotein M6-a OS=Mus musculus OX=10090 GN=Gpm6a	Gpm6a	31.149	31.648	15.8	5	13	5	0.99	0.973	0.999	0.974	0.858	1.074	1.111	1.012	1.03	0.69354
P35803	Neuronal membrane glycoprotein M6-b OS=Mus musculus OX=10090 GN=Gpm6b	Gpm6b	36.209	41.117	25.9	8	23	8	1.054	0.968	1.035	0.899	0.994	0.941	1.064	1.025	1.017	0.70026
P35821	Tyrosine-protein phosphatase non-receptor type 1 OS=Mus musculus OX=10090 GN=Ptpn1	Ptpn1	49.593	40.569	22.2	9	14	9	1.05	1.032	1.078	0.953	0.976	0.926	1.002	1.048	0.961	0.32308
P35822	Receptor-type tyrosine-protein phosphatase kappa OS=Mus musculus OX=10090 GN=Ptprk	Ptprk	164.18	9.197	2.5	3	4	3	0.998	0.99	0.984	0.995	1.038	0.878	1.068	1.06	1.019	0.75174
P35831	Tyrosine-protein phosphatase non-receptor type 12 OS=Mus musculus OX=10090 GN=Ptpn12	Ptpn12	86.525	17.924	9.8	7	7	7	1.008	1.177	1.031	0.867	1.058	1.038	1.037	0.857	0.977	0.80364
P35846	Folate receptor alpha OS=Mus musculus OX=10090 GN=Folr1	Folr1	29.449	4.743	11	2	2	2
P35917	Vascular endothelial growth factor receptor 3 OS=Mus musculus OX=10090 GN=Flt4	Flt4	153.01	-2	0.5	1	1	1
P35922	Synaptic functional regulator FMR1 OS=Mus musculus OX=10090 GN=Fmr1	Fmr1	68.988	131.96	29.5	17	27	14	1.048	0.989	1.001	0.964	0.963	1.01	0.958	1.022	0.988	0.62738
P35969	Vascular endothelial growth factor receptor 1 OS=Mus musculus OX=10090 GN=Flt1	Flt1	149.87	1.6163	1.1	1	1	1	0.828	0.884	1.081	1.199	1.163	0.903	1.028	0.921	1.006	0.91384
P35979	60S ribosomal protein L12 OS=Mus musculus OX=10090 GN=Rpl12	Rpl12	17.804	101.76	59.4	10	25	10	1.065	1.009	1.002	1.047	0.965	0.994	1.018	0.986	0.961	0.074904
P35980	60S ribosomal protein L18 OS=Mus musculus OX=10090 GN=Rpl18	Rpl18	21.644	57.341	35.6	6	10	6	1.056	1.015	1.094	1.018	0.867	0.954	1.045	1.011	0.927	0.130782
P36536	GTP-binding protein SAR1a OS=Mus musculus OX=10090 GN=Sar1a	Sar1a	22.371	26.165	34.8	7	12	4	0.984	0.907	0.895	1.225	0.962	1.225	1.025	0.912	1.028	0.77004
P36552	Oxygen-dependent coproporphyrinogen-III oxidase, mitochondrial OS=Mus musculus OX=10090 GN=Cpox	Cpox	49.714	17.843	15.1	5	5	5	0.972	0.906	0.97	1.221	0.991	0.884	0.917	1.1	0.957	0.62766
P36916	Guanine nucleotide-binding protein-like 1 OS=Mus musculus OX=10090 GN=Gnl1	Gnl1	68.77	137.71	28.8	15	20	15	0.997	0.976	1.019	0.942	0.974	0.994	1.051	1.064	1.038	0.22264
P36993	Protein phosphatase 1B OS=Mus musculus OX=10090 GN=Ppm1b	Ppm1b	42.795	55.216	33.8	10	13	8	0.951	1.017	0.962	0.999	1.002	1.087	1.03	1.03	1.056	0.057442
P37040	NADPH--cytochrome P450 reductase OS=Mus musculus OX=10090 GN=Por	Por	77.043	101.3	31.1	18	33	18	1.068	1.019	1.021	0.99	0.992	0.975	0.971	0.977	0.955	0.032216
P37172	Activin receptor type-1 OS=Mus musculus OX=10090 GN=Acvr1	Acvr1	57.225	3.6413	2.4	1	1	1
P37804	Transgelin OS=Mus musculus OX=10090 GN=Tagln	Tagln	22.576	15.138	23.9	5	6	4	1.145	1.067	0.989	1.19	0.961	0.875	0.835	0.953	0.825	0.0113574
P37889	Fibulin-2 OS=Mus musculus OX=10090 GN=Fbln2	Fbln2	131.83	2.0306	0.8	1	1	1
P37913	DNA ligase 1 OS=Mus musculus OX=10090 GN=Lig1	Lig1	102.29	13.4	2.8	2	2	2
P38060	Hydroxymethylglutaryl-CoA lyase, mitochondrial OS=Mus musculus OX=10090 GN=Hmgcl	Hmgcl	34.238	51.209	28.9	8	11	8	0.982	0.997	0.96	0.968	1.038	1.073	0.978	1.004	1.048	0.079157
P38585	Tubulin--tyrosine ligase OS=Mus musculus OX=10090 GN=Ttl	Ttl	43.136	27.676	19.6	7	7	7	1.063	0.959	1.019	0.931	0.941	0.951	1.013	1.044	0.994	0.89396
P38647	Stress-70 protein, mitochondrial OS=Mus musculus OX=10090 GN=Hspa9	Hspa9	73.46	323.31	46.5	32	99	31	0.99	1.022	1.006	1.036	0.985	1.005	0.986	0.989	0.978	0.088661
P39038	Cadherin-4 OS=Mus musculus OX=10090 GN=Cdh4	Cdh4	100.03	19.885	7.7	6	7	5	1.099	0.945	0.918	1.037	0.973	1.051	0.945	1.046	1.004	0.91412
P39053	Dynamin-1 OS=Mus musculus OX=10090 GN=Dnm1	Dnm1	97.802	323.31	49.8	46	127	36	0.988	1.013	0.992	1.058	0.997	0.955	0.985	1.013	0.975	0.25682
P39054	Dynamin-2 OS=Mus musculus OX=10090 GN=Dnm2	Dnm2	98.144	117.09	26.3	25	50	11	0.997	0.975	0.998	1.061	1.007	1.003	0.968	0.987	0.984	0.45602
P39061	Collagen alpha-1(XVIII) chain OS=Mus musculus OX=10090 GN=Col18a1	Col18a1	182.17	2.8723	1.1	2	2	2
P39087	Glutamate receptor ionotropic, kainate 2 OS=Mus musculus OX=10090 GN=Grik2	Grik2	102.49	43.767	13.3	10	10	9	1.063	0.913	0.947	1.081	0.985	1.087	0.962	0.977	1.002	0.95128
P39098	Mannosyl-oligosaccharide 1,2-alpha-mannosidase IB OS=Mus musculus OX=10090 GN=Man1a2	Man1a2	72.871	5.5088	5.3	3	3	3
P39429	TNF receptor-associated factor 2 OS=Mus musculus OX=10090 GN=Traf2	Traf2	56.026	3.383	3	2	2	2
P39447	Tight junction protein ZO-1 OS=Mus musculus OX=10090 GN=Tjp1	Tjp1	194.74	162.75	16.9	28	34	28	1.033	0.982	1.033	1.038	0.992	0.966	0.94	0.991	0.952	0.035477
P39688	Tyrosine-protein kinase Fyn OS=Mus musculus OX=10090 GN=Fyn	Fyn	60.674	108.37	27.9	16	31	11	0.983	0.974	0.96	1.012	0.999	1.021	1.037	1.018	1.037	0.035219
P39749	Flap endonuclease 1 OS=Mus musculus OX=10090 GN=Fen1	Fen1	42.314	9.4793	7.4	3	4	3	0.955	0.867	1	1.098	0.992	1.106	1.1	0.989	1.068	0.28608
P40124	Adenylyl cyclase-associated protein 1 OS=Mus musculus OX=10090 GN=Cap1	Cap1	51.564	141.73	52.3	25	65	24	1.003	0.989	1.001	0.979	1.011	0.976	1.016	1.014	1.011	0.35154
P40142	Transketolase OS=Mus musculus OX=10090 GN=Tkt	Tkt	67.63	323.31	46.2	26	91	26	0.99	0.975	0.999	1.02	1.009	1.022	0.995	0.995	1.009	0.44562
P40237	CD82 antigen OS=Mus musculus OX=10090 GN=Cd82	Cd82	29.628	2.6023	6.8	2	2	2
P40240	CD9 antigen OS=Mus musculus OX=10090 GN=Cd9	Cd9	25.258	1.4421	3.1	1	2	1	1.03	0.894	1.037	1.224	0.97	0.988	0.948	0.924	0.915	0.29792
P40336	Vacuolar protein sorting-associated protein 26A OS=Mus musculus OX=10090 GN=Vps26a	Vps26a	38.113	41.272	33	11	18	10	1.007	1.078	0.99	0.982	0.952	0.976	1.008	1.008	0.972	0.31378
P40338	von Hippel-Lindau disease tumor suppressor OS=Mus musculus OX=10090 GN=Vhl	Vhl	20.769	2.5777	5.5	1	1	1
P40630	Transcription factor A, mitochondrial OS=Mus musculus OX=10090 GN=Tfam	Tfam	27.987	4.9291	10.7	3	3	3	0.945	1.083	0.996	0.973	1.007	1.122	0.948	0.947	1.007	0.9134
P41105	60S ribosomal protein L28 OS=Mus musculus OX=10090 GN=Rpl28	Rpl28	15.733	29.365	49.6	9	16	9	1.003	1.074	1.086	1.015	0.906	1	1.033	0.898	0.918	0.076236
P41216	Long-chain-fatty-acid--CoA ligase 1 OS=Mus musculus OX=10090 GN=Acsl1	Acsl1	77.951	64.597	26	16	18	13	1.031	1.023	1.026	1.019	1.011	0.989	0.952	1.001	0.964	0.072139
P41230	Lysine-specific demethylase 5C OS=Mus musculus OX=10090 GN=Kdm5c	Kdm5c	175.31	1.5945	0.6	1	2	1
P41233	ATP-binding cassette sub-family A member 1 OS=Mus musculus OX=10090 GN=Abca1	Abca1	253.91	15.812	2.2	5	5	5	0.985	0.987	0.996	1.072	1.024	0.915	0.887	1.141	0.982	0.72296
P41234	ATP-binding cassette sub-family A member 2 OS=Mus musculus OX=10090 GN=Abca2	Abca2	270.51	17.129	2.3	6	7	6	1.017	1.016	0.906	1.065	1.008	0.979	1.023	1.05	1.014	0.69646
P41241	Tyrosine-protein kinase CSK OS=Mus musculus OX=10090 GN=Csk	Csk	50.716	71.054	31.1	12	17	12	0.976	0.913	0.952	0.987	1.012	1.107	1.025	1.031	1.091	0.0172799
P41242	Megakaryocyte-associated tyrosine-protein kinase OS=Mus musculus OX=10090 GN=Matk	Matk	56.056	58.705	17	7	10	7	0.91	0.972	1.031	0.913	1.064	1.011	1.126	1.02	1.103	0.042779
P41731	CD63 antigen OS=Mus musculus OX=10090 GN=Cd63	Cd63	25.766	2.7917	4.6	1	1	1
P41778	Pre-B-cell leukemia transcription factor 1 OS=Mus musculus OX=10090 GN=Pbx1	Pbx1	46.625	8.9313	7.2	3	4	3	0.956	0.896	1.047	0.881	1.084	1.109	1.095	0.949	1.121	0.075523
P42125	Enoyl-CoA delta isomerase 1, mitochondrial OS=Mus musculus OX=10090 GN=Eci1	Eci1	32.25	76.136	33.6	8	11	8	0.977	1.002	0.96	1.224	0.936	0.987	0.895	1.055	0.93	0.33904
P42128	Forkhead box protein K1 OS=Mus musculus OX=10090 GN=Foxk1	Foxk1	74.919	5.4756	4.6	3	3	3	1.031	0.922	0.986	0.918	0.948	1.116	1.117	0.979	1.079	0.199683
P42208	Septin-2 OS=Mus musculus OX=10090 GN=Sept2	Sept2	41.525	298.27	55.7	15	26	15	0.997	1.022	1.027	1.041	0.976	1.01	0.954	1.017	0.968	0.112122
P42225	Signal transducer and activator of transcription 1 OS=Mus musculus OX=10090 GN=Stat1	Stat1	87.196	69.034	25.9	16	24	16	0.548	0.594	0.594	0.696	1.013	1.171	1.624	1.666	2.251	0.00098022
P42227	Signal transducer and activator of transcription 3 OS=Mus musculus OX=10090 GN=Stat3	Stat3	88.053	22.536	10.5	7	9	7	1.035	0.984	0.958	0.947	0.951	1.04	1.072	1.018	1.04	0.27294
P42232	Signal transducer and activator of transcription 5B OS=Mus musculus OX=10090 GN=Stat5b	Stat5b	90.001	14.596	5	4	4	4	1.069	1	0.967	1.042	1.036	0.95	0.951	1.011	0.968	0.33878
P42337	Phosphatidylinositol 4,5-bisphosphate 3-kinase catalytic subunit alpha isoform OS=Mus musculus OX=10090 GN=Pik3ca	Pik3ca	124.41	24.496	5.6	5	5	5	1.008	0.981	0.988	1.042	0.99	1.075	0.982	0.984	1.003	0.92472
P42567	Epidermal growth factor receptor substrate 15 OS=Mus musculus OX=10090 GN=Eps15	Eps15	98.47	40.947	15.7	11	13	11	1.072	1.01	1.024	1.198	0.937	0.937	0.891	0.956	0.865	0.0135023
P42669	Transcriptional activator protein Pur-alpha OS=Mus musculus OX=10090 GN=Pura	Pura	34.883	131.83	35.2	11	23	11	1	0.985	1.024	1.036	1.006	0.972	0.969	0.998	0.975	0.141682
P42703	Leukemia inhibitory factor receptor OS=Mus musculus OX=10090 GN=Lifr	Lifr	122.57	1.715	1.5	1	1	1
P42859	Huntingtin OS=Mus musculus OX=10090 GN=Htt	Htt	344.69	153.46	13.2	35	43	35	0.992	0.995	0.984	0.945	1.008	1	1.016	1.001	1.028	0.068937
P42932	T-complex protein 1 subunit theta OS=Mus musculus OX=10090 GN=Cct8	Cct8	59.555	230.51	62.2	35	108	35	1.009	0.996	1	0.984	0.99	1.001	1.005	0.992	1	0.97224
P43006	Excitatory amino acid transporter 2 OS=Mus musculus OX=10090 GN=Slc1a2	Slc1a2	62.03	113.48	21	13	32	13	0.938	0.944	0.977	0.94	1.072	0.951	1.034	1.108	1.096	0.038341
P43024	Cytochrome c oxidase subunit 6A1, mitochondrial OS=Mus musculus OX=10090 GN=Cox6a1	Cox6a1	12.352	46.921	40.5	2	6	2	0.934	1.014	1.019	1.043	1.026	1.139	0.956	0.997	1.027	0.58954
P43025	Tetranectin OS=Mus musculus OX=10090 GN=Clec3b	Clec3b	22.257	5.7684	5.9	1	2	1	0.962	0.938	0.881	1.111	0.952	1.144	1.021	1.017	1.062	0.35838
P43135	COUP transcription factor 2 OS=Mus musculus OX=10090 GN=Nr2f2	Nr2f2	45.571	38.895	19.6	8	10	2	1.038	1.006	0.922	0.937	0.988	1.057	1.013	1.056	1.054	0.154103
P43247	DNA mismatch repair protein Msh2 OS=Mus musculus OX=10090 GN=Msh2	Msh2	104.15	28.202	9.8	9	9	9	0.978	0.856	0.992	1.144	0.899	1.113	1.078	0.963	1.021	0.78258
P43274	Histone H1.4 OS=Mus musculus OX=10090 GN=Hist1h1e	Hist1h1e	21.977	23.579	22.4	6	11	1	0.869	0.903	0.991	1.171	0.864	1.064	1.134	1.033	1.041	0.65186
P43275	Histone H1.1 OS=Mus musculus OX=10090 GN=Hist1h1a	Hist1h1a	21.785	8.4077	16.9	4	6	2	0.833	0.864	1.038	1.364	0.804	1.109	1.121	0.903	0.96	0.8344
P43276	Histone H1.5 OS=Mus musculus OX=10090 GN=Hist1h1b	Hist1h1b	22.576	15.191	22	6	8	4	0.755	0.921	0.987	1.264	0.87	1.176	1.159	0.922	1.051	0.6757
P43277	Histone H1.3 OS=Mus musculus OX=10090 GN=Hist1h1d	Hist1h1d	22.099	3.5742	22.2	6	11	0
P43406	Integrin alpha-V OS=Mus musculus OX=10090 GN=Itgav	Itgav	115.36	59.075	16.1	16	22	16	1.017	0.999	1.013	1.027	1.018	0.987	0.938	0.987	0.969	0.124581
P45376	Aldose reductase OS=Mus musculus OX=10090 GN=Akr1b1	Akr1b1	35.732	72.155	46.8	17	38	17	1.001	0.991	1.003	0.99	1.014	1.01	0.966	0.994	1	0.97242
P45481	CREB-binding protein OS=Mus musculus OX=10090 GN=Crebbp	Crebbp	265.49	1.5445	0.6	2	2	2
P45591	Cofilin-2 OS=Mus musculus OX=10090 GN=Cfl2	Cfl2	18.709	39.789	53	10	35	8	0.946	1.036	0.966	1.014	0.987	1.047	1.024	1.009	1.027	0.31802
P45878	Peptidyl-prolyl cis-trans isomerase FKBP2 OS=Mus musculus OX=10090 GN=Fkbp2	Fkbp2	15.344	19.196	30	6	14	6	1.079	1.144	1.004	1.058	0.95	0.922	0.873	0.963	0.865	0.0059215
P45952	Medium-chain specific acyl-CoA dehydrogenase, mitochondrial OS=Mus musculus OX=10090 GN=Acadm	Acadm	46.481	49.879	30.9	12	19	12	1.028	1.03	0.991	1.072	0.971	1.02	0.934	0.996	0.951	0.090399
P46061	Ran GTPase-activating protein 1 OS=Mus musculus OX=10090 GN=Rangap1	Rangap1	63.53	164.02	27.8	16	26	16	1.054	1.006	1.028	1.001	0.938	0.994	0.99	0.985	0.955	0.043996
P46096	Synaptotagmin-1 OS=Mus musculus OX=10090 GN=Syt1	Syt1	47.417	84.001	39.7	20	56	10	0.997	0.978	1.025	0.949	1.019	0.902	1.017	1.073	1.016	0.73998
P46097	Synaptotagmin-2 OS=Mus musculus OX=10090 GN=Syt2	Syt2	47.262	46.783	29.6	15	36	6	0.805	0.984	0.782	1.75	0.985	0.969	0.726	0.98	0.847	0.58242
P46460	Vesicle-fusing ATPase OS=Mus musculus OX=10090 GN=Nsf	Nsf	82.613	198.02	41.7	33	95	32	0.998	0.999	0.993	1	1.02	0.987	0.991	1.033	1.01	0.43542
P46467	Vacuolar protein sorting-associated protein 4B OS=Mus musculus OX=10090 GN=Vps4b	Vps4b	49.419	9.4422	12.6	5	5	3	1.195	0.954	0.698	1.072	0.993	1.255	0.958	0.906	1.049	0.67874
P46471	26S proteasome regulatory subunit 7 OS=Mus musculus OX=10090 GN=Psmc2	Psmc2	48.647	201.35	69.3	29	49	29	0.998	0.997	0.996	0.978	0.992	1.01	0.989	0.997	1.005	0.50214
P46638	Ras-related protein Rab-11B OS=Mus musculus OX=10090 GN=Rab11b	Rab11b	24.489	54.73	46.8	10	22	1	1.002	0.96	0.972	0.988	0.972	1.059	1.012	1.05	1.044	0.09972
P46660	Alpha-internexin OS=Mus musculus OX=10090 GN=Ina	Ina	55.382	178.2	52.3	29	56	25	0.876	1.048	0.891	1.226	1.015	1.005	0.937	1.044	0.99	0.9884
P46662	Merlin OS=Mus musculus OX=10090 GN=Nf2	Nf2	69.775	2.0285	2.7	2	3	2	1.092	1.047	1.085	1.074	0.808	0.964	0.968	0.983	0.866	0.053075
P46664	Adenylosuccinate synthetase isozyme 2 OS=Mus musculus OX=10090 GN=Adss	Adss	50.02	164.65	42.3	16	29	15	0.984	0.995	1.015	1.014	0.999	0.967	1.013	1.01	0.995	0.72378
P46735	Unconventional myosin-Ib OS=Mus musculus OX=10090 GN=Myo1b	Myo1b	128.56	174.78	27.2	30	39	30	1.003	1.044	1.006	0.985	0.982	1.006	0.978	0.972	0.975	0.132637
P46737	Lys-63-specific deubiquitinase BRCC36 OS=Mus musculus OX=10090 GN=Brcc3	Brcc3	33.34	28.16	13.4	4	4	4	1.028	0.934	1.069	1.127	1.038	0.894	0.949	0.968	0.926	0.179315
P46935	E3 ubiquitin-protein ligase NEDD4 OS=Mus musculus OX=10090 GN=Nedd4	Nedd4	102.71	179.79	33.3	29	43	26	1.018	1.034	0.997	1.079	0.948	0.985	0.968	1.002	0.945	0.034599
P46978	Dolichyl-diphosphooligosaccharide--protein glycosyltransferase subunit STT3A OS=Mus musculus OX=10090 GN=Stt3a	Stt3a	80.597	43.892	12.9	10	15	10	1.01	1.033	1.046	1.071	1.002	0.933	0.967	0.973	0.931	0.0098195
P47199	Quinone oxidoreductase OS=Mus musculus OX=10090 GN=Cryz	Cryz	35.268	76.61	37.5	10	12	10	0.993	1.005	0.96	1.141	0.946	0.888	1.092	0.959	0.948	0.38184
P47226	Testin OS=Mus musculus OX=10090 GN=Tes	Tes	47.983	21.768	13.7	5	7	5	1.077	1.002	1.104	0.846	1.04	0.961	0.926	1.044	0.986	0.87984
P47708	Rabphilin-3A OS=Mus musculus OX=10090 GN=Rph3a	Rph3a	75.488	79.641	15.4	8	9	6	0.326	0.4	0.325	0.354	2.621	2.345	0.722	0.753	4.584	0.031681
P47738	Aldehyde dehydrogenase, mitochondrial OS=Mus musculus OX=10090 GN=Aldh2	Aldh2	56.537	164.99	40.8	17	36	14	1.003	1.001	0.97	1.071	1.04	0.965	0.979	0.978	0.979	0.4717
P47740	Fatty aldehyde dehydrogenase OS=Mus musculus OX=10090 GN=Aldh3a2	Aldh3a2	53.97	65.917	21.5	9	11	9	1.03	0.946	0.995	1.12	0.978	1.01	0.932	0.966	0.95	0.24996
P47743	Metabotropic glutamate receptor 8 OS=Mus musculus OX=10090 GN=Grm8	Grm8	101.83	17.194	6.7	4	4	4
P47746	Cannabinoid receptor 1 OS=Mus musculus OX=10090 GN=Cnr1	Cnr1	52.83	10.594	4.2	3	6	3	0.921	1.079	1.071	0.895	1.077	0.981	1.009	0.993	1.024	0.63856
P47753	F-actin-capping protein subunit alpha-1 OS=Mus musculus OX=10090 GN=Capza1	Capza1	32.939	89.148	38.5	7	14	5	0.994	1.018	0.992	1.062	1.008	0.971	1.038	0.964	0.979	0.40004
P47754	F-actin-capping protein subunit alpha-2 OS=Mus musculus OX=10090 GN=Capza2	Capza2	32.967	201.67	52.1	12	31	10	1.003	0.991	1.027	1.031	0.989	0.993	0.985	1.01	0.981	0.1409
P47757	F-actin-capping protein subunit beta OS=Mus musculus OX=10090 GN=Capzb	Capzb	31.345	97.094	52.3	16	43	16	1.015	0.991	1.005	0.998	0.99	0.98	0.995	1.013	0.992	0.4
P47758	Signal recognition particle receptor subunit beta OS=Mus musculus OX=10090 GN=Srprb	Srprb	29.579	66.752	26	6	9	6	1.067	1.041	1.087	1.181	0.892	0.916	0.882	0.968	0.836	0.0020018
P47791	Glutathione reductase, mitochondrial OS=Mus musculus OX=10090 GN=Gsr	Gsr	53.662	38.207	15.6	6	13	6	0.974	0.904	1.094	0.855	1.018	1.059	0.939	1.057	1.064	0.31918
P47802	Metaxin-1 OS=Mus musculus OX=10090 GN=Mtx1	Mtx1	35.623	18.299	15.1	6	6	6	1.005	1.013	1.01	1.023	0.984	0.962	0.984	0.979	0.965	0.00157652
P47809	Dual specificity mitogen-activated protein kinase kinase 4 OS=Mus musculus OX=10090 GN=Map2k4	Map2k4	44.113	59.771	37.5	13	17	13	0.94	0.98	1.031	1.023	1.012	1.032	1.072	1.007	1.037	0.197438
P47811	Mitogen-activated protein kinase 14 OS=Mus musculus OX=10090 GN=Mapk14	Mapk14	41.287	14.36	14.4	4	4	4	0.915	0.99	1.009	1.15	0.952	1.027	1.007	0.974	0.974	0.66468
P47856	Glutamine--fructose-6-phosphate aminotransferase [isomerizing] 1 OS=Mus musculus OX=10090 GN=Gfpt1	Gfpt1	78.538	189.86	32.3	18	23	18	1.002	1.06	0.986	1.038	0.977	1.014	0.904	0.995	0.952	0.149815
P47857	ATP-dependent 6-phosphofructokinase, muscle type OS=Mus musculus OX=10090 GN=Pfkm	Pfkm	85.268	323.31	40.9	28	71	24	1.014	0.959	0.997	1.041	0.998	0.994	0.99	1.026	0.999	0.9837
P47911	60S ribosomal protein L6 OS=Mus musculus OX=10090 GN=Rpl6	Rpl6	33.509	17.623	22	8	9	8	0.843	1.062	1.105	0.986	0.872	0.998	1.119	1.007	1	0.98702
P47915	60S ribosomal protein L29 OS=Mus musculus OX=10090 GN=Rpl29	Rpl29	17.587	9.3366	16.2	3	4	3	0.918	0.95	1.171	0.974	0.971	1.045	1.077	0.891	0.993	0.94092
P47934	Carnitine O-acetyltransferase OS=Mus musculus OX=10090 GN=Crat	Crat	70.839	34.818	23	14	17	14	0.975	1.056	1.088	0.95	1.009	0.957	1.016	1.026	0.985	0.71016
P47941	Crk-like protein OS=Mus musculus OX=10090 GN=Crkl	Crkl	33.83	112.36	47.9	12	16	12	0.916	1.011	0.968	1.062	1.017	1.035	0.975	1.012	1.021	0.54456
P47955	60S acidic ribosomal protein P1 OS=Mus musculus OX=10090 GN=Rplp1	Rplp1	11.475	18.959	14	1	3	1	1.063	1.033	1.074	0.996	0.97	0.928	0.899	1.045	0.922	0.066636
P47962	60S ribosomal protein L5 OS=Mus musculus OX=10090 GN=Rpl5	Rpl5	34.4	73.765	34.7	12	38	12	1.085	1.053	1.102	0.984	0.955	0.952	0.961	0.924	0.898	0.0068589
P47963	60S ribosomal protein L13 OS=Mus musculus OX=10090 GN=Rpl13	Rpl13	24.305	59.491	37.4	8	11	8	0.994	1.087	1.113	0.986	0.885	0.997	1.021	0.927	0.916	0.09992
P47964	60S ribosomal protein L36 OS=Mus musculus OX=10090 GN=Rpl36	Rpl36	12.215	7.198	33.3	3	5	3	0.958	0.984	1.084	1.072	0.97	1.013	0.951	0.949	0.948	0.174464
P48024	Eukaryotic translation initiation factor 1 OS=Mus musculus OX=10090 GN=Eif1	Eif1	12.746	105.02	63.7	5	12	5	1.04	1.004	1.008	1.028	0.983	0.932	0.925	1.017	0.945	0.055637
P48025	Tyrosine-protein kinase SYK OS=Mus musculus OX=10090 GN=Syk	Syk	71.376	12.309	3	1	1	1	0.906	0.958	0.728	0.931	1.224	1.19	1.132	0.957	1.278	0.025381
P48036	Annexin A5 OS=Mus musculus OX=10090 GN=Anxa5	Anxa5	35.752	89.153	46.1	14	28	14	1.146	0.983	1.045	1.038	1.013	0.946	0.896	0.992	0.913	0.074864
P48168	Glycine receptor subunit beta OS=Mus musculus OX=10090 GN=Glrb	Glrb	55.95	6.7059	4.4	2	3	2
P48193	Protein 4.1 OS=Mus musculus OX=10090 GN=Epb41	Epb41	95.91	40.409	15	10	18	8	1.014	0.875	0.906	1.277	0.905	1.113	1.015	0.896	0.965	0.78476
P48302	Endothelin receptor type B OS=Mus musculus OX=10090 GN=Ednrb	Ednrb	49.56	3.6429	5.9	2	2	2
P48318	Glutamate decarboxylase 1 OS=Mus musculus OX=10090 GN=Gad1	Gad1	66.648	97.25	20.4	12	15	11	1.036	0.992	0.946	1.038	1.076	0.966	0.931	1.053	1.003	0.95464
P48320	Glutamate decarboxylase 2 OS=Mus musculus OX=10090 GN=Gad2	Gad2	65.223	81.258	19.8	10	22	9	0.934	1.055	0.927	1.102	1.065	0.98	0.926	1.035	0.997	0.97742
P48381	Transcription factor RFX3 OS=Mus musculus OX=10090 GN=Rfx3	Rfx3	83.511	24.353	5.2	2	2	2	1.076	0.974	0.928	0.993	0.98	1.07	1.011	0.985	1.019	0.6147
P48410	ATP-binding cassette sub-family D member 1 OS=Mus musculus OX=10090 GN=Abcd1	Abcd1	81.858	4.4049	3.8	2	2	1
P48428	Tubulin-specific chaperone A OS=Mus musculus OX=10090 GN=Tbca	Tbca	12.758	12.409	32.4	5	6	5	0.943	1.017	1.105	1.017	1.053	1.024	0.977	0.92	0.974	0.56706
P48432	Transcription factor SOX-2 OS=Mus musculus OX=10090 GN=Sox2	Sox2	34.454	1.9343	5	2	3	2
P48453	Serine/threonine-protein phosphatase 2B catalytic subunit beta isoform OS=Mus musculus OX=10090 GN=Ppp3cb	Ppp3cb	59.173	79.665	35	15	49	9	1.016	0.96	0.981	0.976	1.001	1.011	1.038	1.036	1.039	0.042884
P48455	Serine/threonine-protein phosphatase 2B catalytic subunit gamma isoform OS=Mus musculus OX=10090 GN=Ppp3cc	Ppp3cc	58.699	14.15	14.2	7	19	3	0.98	0.927	0.878	0.959	1.105	0.929	1.075	1.155	1.139	0.052284
P48678	Prelamin-A/C OS=Mus musculus OX=10090 GN=Lmna	Lmna	74.237	175.07	44.2	30	48	29	0.978	0.993	0.966	1.006	1.006	1.039	0.994	1.006	1.026	0.09688
P48722	Heat shock 70 kDa protein 4L OS=Mus musculus OX=10090 GN=Hspa4l	Hspa4l	94.381	264.52	48.2	36	63	34	1	1.046	1.018	1.116	0.966	0.931	0.944	1.003	0.92	0.028464
P48725	Pericentrin OS=Mus musculus OX=10090 GN=Pcnt	Pcnt	329.46	3.0194	0.9	2	2	2	0.88	1.119	0.883	1.11	1.006	1.071	1.059	0.908	1.013	0.82678
P48758	Carbonyl reductase [NADPH] 1 OS=Mus musculus OX=10090 GN=Cbr1	Cbr1	30.641	117.93	68.6	17	29	16	0.992	1.032	0.96	1.014	1.017	0.985	1.016	1.032	1.013	0.50212
P48771	Cytochrome c oxidase subunit 7A2, mitochondrial OS=Mus musculus OX=10090 GN=Cox7a2	Cox7a2	9.2908	15.141	27.7	2	8	2	0.96	0.999	1.064	1.057	0.999	0.969	0.982	0.971	0.961	0.176257
P48774	Glutathione S-transferase Mu 5 OS=Mus musculus OX=10090 GN=Gstm5	Gstm5	26.635	53.882	58.5	14	34	12	0.975	0.966	0.895	0.965	1.035	1.041	1.051	1.056	1.1	0.0180404
P48962	ADP/ATP translocase 1 OS=Mus musculus OX=10090 GN=Slc25a4	Slc25a4	32.904	102.34	55.4	19	74	9	1.036	1.038	0.962	0.978	1.014	0.986	0.987	1.026	1	0.99382
P49025	Citron Rho-interacting kinase OS=Mus musculus OX=10090 GN=Cit	Cit	235.39	86.024	10.4	21	26	21	0.973	0.997	1.01	1.12	0.984	0.959	0.885	1.078	0.953	0.3704
P49070	Calcium signal-modulating cyclophilin ligand OS=Mus musculus OX=10090 GN=Camlg	Camlg	32.542	5.8661	7.1	2	3	2	1.076	0.95	0.956	1.014	1.021	1.084	0.97	0.945	1.006	0.89322
P49117	Nuclear receptor subfamily 2 group C member 2 OS=Mus musculus OX=10090 GN=Nr2c2	Nr2c2	65.239	2.2207	2.5	2	3	2	0.969	0.881	0.967	1	1.017	1.026	1.116	1.037	1.099	0.033484
P49135	General transcription and DNA repair factor IIH helicase subunit XPB OS=Mus musculus OX=10090 GN=Ercc3	Ercc3	89.125	14.753	3.3	2	2	2	1.042	0.936	0.821	0.892	0.98	1.104	0.964	1.272	1.17	0.105321
P49138	MAP kinase-activated protein kinase 2 OS=Mus musculus OX=10090 GN=Mapkapk2	Mapkapk2	44.049	-2	3.4	1	1	1
P49300	C-type lectin domain family 10 member A OS=Mus musculus OX=10090 GN=Clec10a	Clec10a	34.595	-2	4.6	1	1	1	1.097	1.044	0.832	0.983	0.726	1.248	1.017	1.091	1.032	0.8963
P49312	Heterogeneous nuclear ribonucleoprotein A1 OS=Mus musculus OX=10090 GN=Hnrnpa1	Hnrnpa1	34.196	264.21	64.1	20	59	18	1.009	0.932	0.98	0.971	0.992	1.068	1.062	0.982	1.054	0.103841
P49442	Inositol polyphosphate 1-phosphatase OS=Mus musculus OX=10090 GN=Inpp1	Inpp1	43.346	77.48	28.5	10	18	10	1.022	0.922	1.009	0.991	1.048	0.969	0.999	1.031	1.026	0.39974
P49443	Protein phosphatase 1A OS=Mus musculus OX=10090 GN=Ppm1a	Ppm1a	42.432	65.991	45	15	24	13	0.981	1.036	0.987	0.986	1.028	1.031	0.998	0.989	1.014	0.42838
P49446	Receptor-type tyrosine-protein phosphatase epsilon OS=Mus musculus OX=10090 GN=Ptpre	Ptpre	80.687	33.053	10.4	8	11	6	1.004	0.971	0.966	1.071	0.978	0.948	0.95	1.123	0.997	0.92026
P49586	Choline-phosphate cytidylyltransferase A OS=Mus musculus OX=10090 GN=Pcyt1a	Pcyt1a	41.666	26.786	21.5	8	11	7	0.972	0.962	0.988	1.026	0.966	1.045	1.058	1	1.031	0.28132
P49615	Cyclin-dependent-like kinase 5 OS=Mus musculus OX=10090 GN=Cdk5	Cdk5	33.288	56.177	59.2	17	34	16	0.992	0.983	0.986	0.968	1.016	1.006	1.046	1.014	1.039	0.0088385
P49710	Hematopoietic lineage cell-specific protein OS=Mus musculus OX=10090 GN=Hcls1	Hcls1	54.24	5.3664	4.5	2	2	2	0.961	0.925	0.908	1.121	1.004	0.963	1.046	1.089	1.048	0.4037
P49717	DNA replication licensing factor MCM4 OS=Mus musculus OX=10090 GN=Mcm4	Mcm4	96.735	6.3686	3.4	3	3	3	1.063	0.99	0.968	1.149	0.986	0.956	0.909	0.996	0.923	0.121583
P49718	DNA replication licensing factor MCM5 OS=Mus musculus OX=10090 GN=Mcm5	Mcm5	82.342	10.958	8.7	5	5	5	1	0.979	0.985	1.603	0.773	0.889	0.886	0.921	0.76	0.093118
P49722	Proteasome subunit alpha type-2 OS=Mus musculus OX=10090 GN=Psma2	Psma2	25.926	45.368	35	8	19	8	1.001	1.007	1	1.009	0.957	1.037	0.992	0.994	0.991	0.60108
P49769	Presenilin-1 OS=Mus musculus OX=10090 GN=Psen1	Psen1	52.639	10.087	3.6	1	1	1	0.868	1.102	0.877	1.19	0.934	1.056	0.952	1.056	0.99	0.98506
P49817	Caveolin-1 OS=Mus musculus OX=10090 GN=Cav1	Cav1	20.538	8.8041	21.3	4	4	3	1.218	1.074	1.103	0.965	0.983	0.932	0.849	0.882	0.836	0.021859
P49935	Pro-cathepsin H OS=Mus musculus OX=10090 GN=Ctsh	Ctsh	37.17	5.8366	4.5	1	1	1	1.077	1.048	1.05	1.19	0.847	0.968	0.82	1.018	0.837	0.0236
P49962	Signal recognition particle 9 kDa protein OS=Mus musculus OX=10090 GN=Srp9	Srp9	10.194	13.572	53.5	5	9	5	1.062	1.021	1.083	0.991	0.955	0.97	0.958	1.034	0.942	0.071955
P50096	Inosine-5'-monophosphate dehydrogenase 1 OS=Mus musculus OX=10090 GN=Impdh1	Impdh1	55.278	30.235	15.4	8	9	6	0.89	1.113	1.073	0.959	0.99	0.973	0.956	1.063	0.987	0.8636
P50136	2-oxoisovalerate dehydrogenase subunit alpha, mitochondrial OS=Mus musculus OX=10090 GN=Bckdha	Bckdha	50.37	43.026	14.7	6	8	6	0.983	0.988	0.931	1.11	0.989	0.999	1.036	0.991	1.001	0.94734
P50153	Guanine nucleotide-binding protein G(I)/G(S)/G(O) subunit gamma-4 OS=Mus musculus OX=10090 GN=Gng4	Gng4	8.4047	39.265	82.7	5	11	5	0.875	0.97	1.026	1.015	1.087	0.998	0.982	1.099	1.072	0.180563
P50171	Estradiol 17-beta-dehydrogenase 8 OS=Mus musculus OX=10090 GN=Hsd17b8	Hsd17b8	26.588	39.307	23.2	5	6	5	0.981	0.974	0.985	1.041	1.024	1.021	0.965	1.007	1.009	0.67366
P50247	Adenosylhomocysteinase OS=Mus musculus OX=10090 GN=Ahcy	Ahcy	47.688	117.97	47	21	43	21	0.972	0.979	0.961	0.996	1.04	1.048	1.03	0.995	1.052	0.0097757
P50285	Dimethylaniline monooxygenase [N-oxide-forming] 1 OS=Mus musculus OX=10090 GN=Fmo1	Fmo1	59.914	10.511	10	6	6	6	0.975	0.93	0.98	1.1	1.093	0.989	0.974	0.97	1.01	0.81754
P50396	Rab GDP dissociation inhibitor alpha OS=Mus musculus OX=10090 GN=Gdi1	Gdi1	50.521	210.49	60.2	25	119	18	0.939	0.947	0.98	0.982	1.006	1.036	1.028	1.032	1.066	0.0029371
P50427	Steryl-sulfatase OS=Mus musculus OX=10090 GN=Sts	Sts	66.59	7.3115	8.2	5	5	5	0.954	0.996	0.912	1.072	1.063	1.145	1.055	0.932	1.066	0.2917
P50428	Arylsulfatase A OS=Mus musculus OX=10090 GN=Arsa	Arsa	53.748	7.6088	7.9	4	5	3	0.992	0.992	0.928	0.97	1.01	1.044	1.045	1.036	1.065	0.0113785
P50429	Arylsulfatase B OS=Mus musculus OX=10090 GN=Arsb	Arsb	59.646	58.368	19.9	10	17	10	1	0.949	1.014	1.041	1.04	0.918	0.985	1.055	0.999	0.95022
P50431	Serine hydroxymethyltransferase, cytosolic OS=Mus musculus OX=10090 GN=Shmt1	Shmt1	52.6	12.78	10	4	6	3	0.959	0.882	1.044	1.054	0.995	1.065	1.073	0.942	1.035	0.52314
P50516	V-type proton ATPase catalytic subunit A OS=Mus musculus OX=10090 GN=Atp6v1a	Atp6v1a	68.325	313.18	50.6	28	92	28	0.968	0.989	0.986	1.006	0.996	0.983	1	1.028	1.015	0.28104
P50518	V-type proton ATPase subunit E 1 OS=Mus musculus OX=10090 GN=Atp6v1e1	Atp6v1e1	26.157	78.357	48.7	13	59	13	0.965	0.986	0.984	1.014	0.986	1.005	1.019	1.033	1.024	0.149558
P50544	Very long-chain specific acyl-CoA dehydrogenase, mitochondrial OS=Mus musculus OX=10090 GN=Acadvl	Acadvl	70.875	115.94	36.1	20	29	20	0.97	0.962	0.928	1.033	1.016	1.034	1.021	1.033	1.054	0.099737
P50571	Gamma-aminobutyric acid receptor subunit beta-1 OS=Mus musculus OX=10090 GN=Gabrb1	Gabrb1	54.1	5.772	18.8	8	16	2	0.958	1.135	1.012	0.844	0.947	1.051	1.057	1.019	1.032	0.60902
P50580	Proliferation-associated protein 2G4 OS=Mus musculus OX=10090 GN=Pa2g4	Pa2g4	43.698	147.94	53.3	21	47	21	1.014	0.991	1.005	0.984	0.997	1.019	1.011	0.984	1.004	0.69488
P50586	Tubby protein OS=Mus musculus OX=10090 GN=Tub	Tub	55.361	31.591	7.5	3	3	3	1.019	1.021	0.962	0.944	1.008	1.086	1.017	0.942	1.027	0.48792
P50992	Potassium-transporting ATPase subunit beta OS=Mus musculus OX=10090 GN=Atp4b	Atp4b	33.566	-2	2.4	1	1	1
P51150	Ras-related protein Rab-7a OS=Mus musculus OX=10090 GN=Rab7a	Rab7a	23.489	144.41	72.9	15	42	15	1.011	1.032	1.023	1.026	0.995	0.973	0.964	0.988	0.958	0.0021615
P51163	Uroporphyrinogen-III synthase OS=Mus musculus OX=10090 GN=Uros	Uros	28.504	20.301	33.2	6	6	6	1.025	1.05	1.032	0.938	0.917	0.979	1.036	1.011	0.975	0.50946
P51174	Long-chain specific acyl-CoA dehydrogenase, mitochondrial OS=Mus musculus OX=10090 GN=Acadl	Acadl	47.907	77.16	35.1	13	30	13	1.006	0.995	0.986	1.068	1.012	1.03	0.948	0.982	0.98	0.45
P51175	Protoporphyrinogen oxidase OS=Mus musculus OX=10090 GN=Ppox	Ppox	50.87	10.748	7.3	3	4	3	0.908	1.011	0.892	1.03	0.964	1.175	1.058	0.993	1.091	0.182502
P51410	60S ribosomal protein L9 OS=Mus musculus OX=10090 GN=Rpl9	Rpl9	21.881	34.72	32.3	7	16	7	1.076	1.041	1.022	0.982	0.967	0.956	0.976	0.952	0.934	0.0147822
P51432	1-phosphatidylinositol 4,5-bisphosphate phosphodiesterase beta-3 OS=Mus musculus OX=10090 GN=Plcb3	Plcb3	139.49	39.187	10.8	12	14	12	0.999	0.948	1.088	1.141	0.911	0.946	0.988	0.922	0.902	0.067637
P51569	Alpha-galactosidase A OS=Mus musculus OX=10090 GN=Gla	Gla	47.642	5.3611	6	2	3	2
P51655	Glypican-4 OS=Mus musculus OX=10090 GN=Gpc4	Gpc4	62.586	55.402	25	12	14	10	0.934	1.014	0.896	1.082	0.995	0.915	1.066	1.119	1.043	0.51526
P51660	Peroxisomal multifunctional enzyme type 2 OS=Mus musculus OX=10090 GN=Hsd17b4	Hsd17b4	79.481	192.38	28.6	20	37	20	0.991	0.972	0.96	1.061	1.006	1.017	1.011	0.953	1.001	0.96664
P51667	Myosin regulatory light chain 2, ventricular/cardiac muscle isoform OS=Mus musculus OX=10090 GN=Myl2	Myl2	18.864	4.5364	7.8	1	1	1
P51791	H(+)/Cl(-) exchange transporter 3 OS=Mus musculus OX=10090 GN=Clcn3	Clcn3	90.868	17.799	9.2	7	8	7	0.985	0.938	0.998	1.061	0.933	1.02	1.07	1.037	1.02	0.6403
P51807	Dynein light chain Tctex-type 1 OS=Mus musculus OX=10090 GN=Dynlt1	Dynlt1	12.483	33.781	30.1	2	5	2	0.951	0.992	0.904	1.052	0.97	1.068	1.032	0.961	1.034	0.4388
P51830	Adenylate cyclase type 9 OS=Mus musculus OX=10090 GN=Adcy9	Adcy9	150.95	13.048	4.4	6	6	6	0.917	1.03	1.002	1.049	1.028	1.003	1.011	0.98	1.006	0.82754
P51855	Glutathione synthetase OS=Mus musculus OX=10090 GN=Gss	Gss	52.246	30.78	25.1	10	12	10	1.066	0.969	0.978	1.091	0.955	1.026	1	1.022	0.975	0.50972
P51859	Hepatoma-derived growth factor OS=Mus musculus OX=10090 GN=Hdgf	Hdgf	26.268	13.98	18.6	5	7	4	0.728	0.947	1.011	1.04	1.113	1.096	1.101	0.984	1.152	0.132723
P51863	V-type proton ATPase subunit d 1 OS=Mus musculus OX=10090 GN=Atp6v0d1	Atp6v0d1	40.301	76.776	34.5	12	31	12	1.017	0.989	1.005	1	0.983	0.983	0.976	1.034	0.991	0.55962
P51880	Fatty acid-binding protein, brain OS=Mus musculus OX=10090 GN=Fabp7	Fabp7	14.893	105.72	45.5	6	33	6	1.068	1.033	1.098	1.117	0.957	0.911	0.881	0.961	0.86	0.00135567
P51881	ADP/ATP translocase 2 OS=Mus musculus OX=10090 GN=Slc25a5	Slc25a5	32.931	60.279	51.7	19	57	9	1.001	0.992	0.98	1.021	1.044	0.997	0.989	0.985	1.005	0.76106
P51906	Excitatory amino acid transporter 3 OS=Mus musculus OX=10090 GN=Slc1a1	Slc1a1	56.693	24.437	6.1	2	3	2	1.056	0.955	0.981	0.979	0.969	0.912	0.978	1.038	0.981	0.59624
P51949	CDK-activating kinase assembly factor MAT1 OS=Mus musculus OX=10090 GN=Mnat1	Mnat1	35.848	13.264	9.4	2	2	2	0.947	1.144	0.893	0.979	0.967	1.091	1.001	1.009	1.026	0.6338
P52019	Squalene monooxygenase OS=Mus musculus OX=10090 GN=Sqle	Sqle	63.769	8.7789	4.9	2	2	2
P52194	Calmegin OS=Mus musculus OX=10090 GN=Clgn	Clgn	69.43	7.6392	3.1	1	1	1
P52196	Thiosulfate sulfurtransferase OS=Mus musculus OX=10090 GN=Tst	Tst	33.466	67.325	42.8	12	21	12	0.999	1.018	0.998	1.137	0.932	0.987	0.952	0.996	0.931	0.091381
P52293	Importin subunit alpha-1 OS=Mus musculus OX=10090 GN=Kpna2	Kpna2	57.927	29.831	13.4	5	5	5	1.076	1.051	0.916	1.108	1.004	1.122	0.901	0.848	0.934	0.37274
P52332	Tyrosine-protein kinase JAK1 OS=Mus musculus OX=10090 GN=Jak1	Jak1	133.37	7.6854	3.6	4	4	4	1.108	0.859	1.105	0.955	1.003	1.06	0.956	0.953	0.986	0.8962
P52431	DNA polymerase delta catalytic subunit OS=Mus musculus OX=10090 GN=Pold1	Pold1	123.79	2.4251	0.8	1	1	1
P52432	DNA-directed RNA polymerases I and III subunit RPAC1 OS=Mus musculus OX=10090 GN=Polr1c	Polr1c	39.106	10.654	11	3	3	3	0.855	1.022	0.916	0.968	0.906	1.146	1.057	1.157	1.134	0.120344
P52479	Ubiquitin carboxyl-terminal hydrolase 10 OS=Mus musculus OX=10090 GN=Usp10	Usp10	87.021	113.07	20.8	13	15	13	1.005	1.058	1.048	0.939	1.014	1.009	0.956	0.968	0.975	0.44952
P52480	Pyruvate kinase PKM OS=Mus musculus OX=10090 GN=Pkm	Pkm	57.844	323.31	68.9	35	124	35	0.989	0.998	0.994	1.041	0.999	0.993	1.004	0.995	0.992	0.57544
P52503	NADH dehydrogenase [ubiquinone] iron-sulfur protein 6, mitochondrial OS=Mus musculus OX=10090 GN=Ndufs6	Ndufs6	13.02	30.962	62.1	6	9	6	0.961	1.033	0.964	1.085	1.037	1.028	0.904	1.028	0.989	0.79878
P52623	Uridine-cytidine kinase 1 OS=Mus musculus OX=10090 GN=Uck1	Uck1	31.068	17.399	16.2	4	4	4	1.027	0.961	0.944	0.887	1.066	0.991	0.927	1.123	1.075	0.2159
P52624	Uridine phosphorylase 1 OS=Mus musculus OX=10090 GN=Upp1	Upp1	34.086	2.0034	2.3	1	1	1	0.948	0.961	0.982	1.095	1.039	0.972	1	1.017	1.011	0.75152
P52734	FYVE, RhoGEF and PH domain-containing protein 1 OS=Mus musculus OX=10090 GN=Fgd1	Fgd1	106.36	23.881	6.9	6	6	5	0.973	1.124	0.905	0.886	1.017	1.027	0.991	1.098	1.063	0.30686
P52760	2-iminobutanoate/2-iminopropanoate deaminase OS=Mus musculus OX=10090 GN=Rida	Rida	14.255	25.713	37.8	4	6	4	1.019	1.059	0.951	1.175	0.983	0.965	0.952	1.01	0.93	0.179881
P52795	Ephrin-B1 OS=Mus musculus OX=10090 GN=Efnb1	Efnb1	37.859	24.144	12.8	3	3	3
P52800	Ephrin-B2 OS=Mus musculus OX=10090 GN=Efnb2	Efnb2	37.202	24.634	21.1	5	6	5	0.992	0.919	1.075	0.834	1.096	1.074	1.047	0.941	1.088	0.2202
P52825	Carnitine O-palmitoyltransferase 2, mitochondrial OS=Mus musculus OX=10090 GN=Cpt2	Cpt2	73.98	28.378	18.4	10	12	10	0.981	1.007	0.946	1.029	1.03	1.031	0.982	1.002	1.021	0.3732
P52875	Transmembrane protein 165 OS=Mus musculus OX=10090 GN=Tmem165	Tmem165	34.79	25.366	15.8	3	4	3	1.207	0.957	1.121	0.967	0.919	0.962	0.89	0.979	0.882	0.093141
P52912	Nucleolysin TIA-1 OS=Mus musculus OX=10090 GN=Tia1	Tia1	42.799	37.08	18.9	8	11	5	1.023	0.974	0.99	1.036	1.014	0.977	1.114	0.88	0.991	0.81036
P52927	High mobility group protein HMGI-C OS=Mus musculus OX=10090 GN=Hmga2	Hmga2	11.819	23.385	32.4	2	3	2	0.94	1.019	0.973	0.872	1.092	1.102	1.059	0.96	1.108	0.065936
P52963	Band 4.1-like protein 4A OS=Mus musculus OX=10090 GN=Epb41l4a	Epb41l4a	78.532	2.4043	1.3	1	1	1	1.049	1.035	0.987	0.879	0.952	1.155	1.023	0.943	1.031	0.64728
P53026	60S ribosomal protein L10a OS=Mus musculus OX=10090 GN=Rpl10a	Rpl10a	24.916	57.369	36.4	9	30	9	1.031	1.033	1.088	0.922	1.003	0.985	1.026	0.93	0.968	0.47138
P53395	Lipoamide acyltransferase component of branched-chain alpha-keto acid dehydrogenase complex, mitochondrial OS=Mus musculus OX=10090 GN=Dbt	Dbt	53.246	18.018	15.8	8	9	8	1.051	0.997	0.994	1.035	1.015	0.95	1.017	0.959	0.967	0.18504
P53569	CCAAT/enhancer-binding protein zeta OS=Mus musculus OX=10090 GN=Cebpz	Cebpz	120.26	5.3366	1.3	1	1	1
P53612	Geranylgeranyl transferase type-2 subunit beta OS=Mus musculus OX=10090 GN=Rabggtb	Rabggtb	37.803	15.307	10	3	4	3	1.069	0.967	0.998	1.158	1.069	0.859	0.913	0.974	0.91	0.173185
P53668	LIM domain kinase 1 OS=Mus musculus OX=10090 GN=Limk1	Limk1	72.792	6.4867	4.3	3	3	3	0.918	0.981	0.969	1.267	0.93	0.949	0.817	1.184	0.938	0.56218
P53690	Matrix metalloproteinase-14 OS=Mus musculus OX=10090 GN=Mmp14	Mmp14	65.918	-2	1.9	1	2	1	0.984	0.932	0.995	1.082	0.956	0.994	1.012	1.061	1.008	0.83448
P53702	Cytochrome c-type heme lyase OS=Mus musculus OX=10090 GN=Hccs	Hccs	30.977	104.76	55.1	12	14	12	1.018	1.052	0.996	0.984	1.041	0.963	1.009	0.978	0.985	0.53784
P53798	Squalene synthase OS=Mus musculus OX=10090 GN=Fdft1	Fdft1	48.154	28.46	10.6	4	5	4	1.226	1.117	1.176	1.055	0.886	0.966	0.832	0.839	0.77	0.00147911
P53810	Phosphatidylinositol transfer protein alpha isoform OS=Mus musculus OX=10090 GN=Pitpna	Pitpna	31.893	203.49	72.3	23	57	21	1.013	1.037	0.976	0.975	1.017	1	1.004	1.008	1.007	0.66952
P53811	Phosphatidylinositol transfer protein beta isoform OS=Mus musculus OX=10090 GN=Pitpnb	Pitpnb	31.487	61.954	48.3	13	18	11	0.973	1.001	0.996	0.911	1.03	1.03	1.066	1.02	1.068	0.030904
P53986	Monocarboxylate transporter 1 OS=Mus musculus OX=10090 GN=Slc16a1	Slc16a1	53.267	38.775	11.4	6	9	6	1.068	1.013	1.046	1.098	1.01	0.918	0.932	0.902	0.89	0.0083845
P53994	Ras-related protein Rab-2A OS=Mus musculus OX=10090 GN=Rab2a	Rab2a	23.547	109.74	60.4	12	39	6	0.999	1.001	1.017	0.992	1.005	1.005	0.979	1.028	1.002	0.87274
P53995	Anaphase-promoting complex subunit 1 OS=Mus musculus OX=10090 GN=Anapc1	Anapc1	215.99	42.533	8.3	16	18	16	0.97	1.068	1.011	1.046	0.977	1.047	0.977	0.947	0.964	0.26684
P53996	Cellular nucleic acid-binding protein OS=Mus musculus OX=10090 GN=Cnbp	Cnbp	19.592	48.305	33.7	6	13	6	1.043	0.992	0.974	0.861	1.014	1.092	1.068	0.977	1.073	0.185319
P54071	Isocitrate dehydrogenase [NADP], mitochondrial OS=Mus musculus OX=10090 GN=Idh2	Idh2	50.906	97.841	32.5	16	27	15	0.992	0.968	0.947	1.026	1.037	1.039	1.006	0.999	1.038	0.111459
P54103	DnaJ homolog subfamily C member 2 OS=Mus musculus OX=10090 GN=Dnajc2	Dnajc2	71.721	39.514	14.2	8	8	8	0.987	1.006	1.024	1.064	0.966	1.038	1.004	0.982	0.978	0.35152
P54116	Erythrocyte band 7 integral membrane protein OS=Mus musculus OX=10090 GN=Stom	Stom	31.375	19.773	23.9	6	8	6	1.074	0.991	1.012	0.968	1.012	0.988	0.981	0.961	0.975	0.34628
P54227	Stathmin OS=Mus musculus OX=10090 GN=Stmn1	Stmn1	17.274	48.678	69.8	17	39	15	0.918	1.022	0.962	0.869	0.995	1.175	1.086	0.992	1.126	0.067299
P54254	Ataxin-1 OS=Mus musculus OX=10090 GN=Atxn1	Atxn1	83.792	7.2895	4	3	3	3	0.89	0.962	0.987	0.941	1.046	1.043	1.168	0.983	1.122	0.035882
P54276	DNA mismatch repair protein Msh6 OS=Mus musculus OX=10090 GN=Msh6	Msh6	151.08	19.374	6.7	8	8	8	0.897	1.07	0.949	1.011	1	1.101	1.111	0.892	1.045	0.53178
P54285	Voltage-dependent L-type calcium channel subunit beta-3 OS=Mus musculus OX=10090 GN=Cacnb3	Cacnb3	54.571	23.718	18.2	8	11	5	0.978	0.948	1.013	0.964	1.059	1.011	0.993	1.041	1.051	0.047284
P54726	UV excision repair protein RAD23 homolog A OS=Mus musculus OX=10090 GN=Rad23a	Rad23a	39.706	47.627	22	7	11	5	0.994	1.046	0.993	1.155	1.049	0.931	0.945	0.991	0.935	0.187118
P54728	UV excision repair protein RAD23 homolog B OS=Mus musculus OX=10090 GN=Rad23b	Rad23b	43.512	32.135	18.3	9	24	7	1.065	0.994	1.016	0.975	0.999	1.023	0.962	0.991	0.981	0.45154
P54729	NEDD8 ultimate buster 1 OS=Mus musculus OX=10090 GN=Nub1	Nub1	70.306	19.263	12.2	7	9	7	0.923	0.943	1.029	0.935	0.931	1.168	0.996	1.091	1.093	0.173023
P54731	FAS-associated factor 1 OS=Mus musculus OX=10090 GN=Faf1	Faf1	73.862	34.905	16	9	10	9	1.017	1.024	1.055	1.021	0.99	0.947	1.003	0.978	0.952	0.015716
P54754	Ephrin type-B receptor 3 OS=Mus musculus OX=10090 GN=Ephb3	Ephb3	109.66	31.177	14.3	13	15	7	0.998	1.112	0.967	1.072	0.962	1.149	0.94	1.019	0.981	0.71954
P54763	Ephrin type-B receptor 2 OS=Mus musculus OX=10090 GN=Ephb2	Ephb2	109.9	144.31	27.9	24	36	19	1.006	1.022	0.989	1.038	0.986	0.951	0.998	1.024	0.976	0.2407
P54775	26S proteasome regulatory subunit 6B OS=Mus musculus OX=10090 GN=Psmc4	Psmc4	47.408	128.8	43.3	18	30	18	1.007	0.996	0.96	1.013	0.954	0.999	1.016	1.024	1.004	0.84334
P54818	Galactocerebrosidase OS=Mus musculus OX=10090 GN=Galc	Galc	77.256	10.144	4.8	3	4	3	0.977	0.866	0.945	0.928	0.972	1.153	1.078	1.096	1.157	0.0165159
P54822	Adenylosuccinate lyase OS=Mus musculus OX=10090 GN=Adsl	Adsl	54.866	108.97	21.7	10	16	10	0.998	0.985	0.961	1.028	0.986	1.012	1.043	0.978	1.012	0.5821
P54823	Probable ATP-dependent RNA helicase DDX6 OS=Mus musculus OX=10090 GN=Ddx6	Ddx6	54.191	96.177	33.5	14	25	14	1.007	1.007	0.952	1.01	0.992	1.08	1.013	0.973	1.021	0.48492
P54830	Tyrosine-protein phosphatase non-receptor type 5 OS=Mus musculus OX=10090 GN=Ptpn5	Ptpn5	60.815	30.153	15.9	6	8	6	0.953	0.976	1.195	1.006	0.973	0.939	1.023	0.945	0.939	0.32394
P54869	Hydroxymethylglutaryl-CoA synthase, mitochondrial OS=Mus musculus OX=10090 GN=Hmgcs2	Hmgcs2	56.822	57.519	25.6	12	18	11	0.789	0.736	0.697	0.742	1.101	1.415	1.304	1.19	1.69	0.000124928
P54923	[Protein ADP-ribosylarginine] hydrolase OS=Mus musculus OX=10090 GN=Adprh	Adprh	40.068	146.13	43.1	12	23	12	1.04	1.014	0.951	0.963	0.987	1.056	0.956	1.02	1.013	0.68638
P55012	Solute carrier family 12 member 2 OS=Mus musculus OX=10090 GN=Slc12a2	Slc12a2	131.03	92.466	15.7	17	23	17	0.966	0.956	0.97	1.091	0.968	0.982	1.007	1.026	1	0.97212
P55065	Phospholipid transfer protein OS=Mus musculus OX=10090 GN=Pltp	Pltp	54.452	10.676	5.3	2	3	2	1.083	1.086	1.091	1.221	0.928	0.603	0.812	1.178	0.786	0.156376
P55066	Neurocan core protein OS=Mus musculus OX=10090 GN=Ncan	Ncan	137.2	185.47	19.3	25	39	24	0.939	0.94	0.967	0.948	1.036	1.044	1.029	1.093	1.108	0.00054098
P55088	Aquaporin-4 OS=Mus musculus OX=10090 GN=Aqp4	Aqp4	34.436	4.9325	6.5	2	2	2	0.847	0.945	0.977	1.26	1.036	1.006	0.94	1.008	0.99	0.99528
P55096	ATP-binding cassette sub-family D member 3 OS=Mus musculus OX=10090 GN=Abcd3	Abcd3	75.474	59.931	21.5	14	25	14	0.996	1.011	1.008	1.013	0.981	1.059	0.97	0.99	0.993	0.73248
P55194	SH3 domain-binding protein 1 OS=Mus musculus OX=10090 GN=Sh3bp1	Sh3bp1	74.172	6.6567	3.2	2	2	2
P55258	Ras-related protein Rab-8A OS=Mus musculus OX=10090 GN=Rab8a	Rab8a	23.668	33.401	41.1	10	17	5	1.024	1.027	0.994	1.023	1.032	1.003	0.95	0.971	0.972	0.20082
P55264	Adenosine kinase OS=Mus musculus OX=10090 GN=Adk	Adk	40.148	70.673	34.3	12	16	12	1.029	1.059	1.044	0.928	1.028	0.949	1.043	1.01	0.993	0.85978
P55284	Cadherin-5 OS=Mus musculus OX=10090 GN=Cdh5	Cdh5	87.902	1.4176	1.3	1	1	1
P55288	Cadherin-11 OS=Mus musculus OX=10090 GN=Cdh11	Cdh11	88.111	92.666	21.6	13	15	13	1.01	1.033	1.05	0.999	1.006	0.973	0.941	0.977	0.952	0.03244
P55302	Alpha-2-macroglobulin receptor-associated protein OS=Mus musculus OX=10090 GN=Lrpap1	Lrpap1	42.215	14.039	8.6	3	3	3
P55821	Stathmin-2 OS=Mus musculus OX=10090 GN=Stmn2	Stmn2	20.828	21.818	37.4	7	30	5	0.927	1.022	0.971	0.872	1.014	1.172	1.114	0.975	1.127	0.070176
P55937	Golgin subfamily A member 3 OS=Mus musculus OX=10090 GN=Golga3	Golga3	167.22	148.63	14.7	15	17	15	0.967	1.056	0.943	1.142	1.079	0.998	0.959	0.979	0.977	0.69298
P56135	ATP synthase subunit f, mitochondrial OS=Mus musculus OX=10090 GN=Atp5j2	Atp5j2	10.344	14.371	26.1	2	10	2	0.975	0.977	0.958	1.006	1.039	1.008	1.023	1.051	1.052	0.0095368
P56183	Ribosomal RNA processing protein 1 homolog A OS=Mus musculus OX=10090 GN=Rrp1	Rrp1	54.776	4.3526	2.4	1	1	1	1.065	1.02	1.003	0.976	0.992	1.086	0.942	0.932	0.972	0.48532
P56371	Ras-related protein Rab-4A OS=Mus musculus OX=10090 GN=Rab4a	Rab4a	24.408	42.414	32.1	7	14	5	1.006	1.015	1.039	0.985	0.98	0.953	0.969	0.984	0.961	0.022883
P56375	Acylphosphatase-2 OS=Mus musculus OX=10090 GN=Acyp2	Acyp2	11.877	30.821	41.5	5	11	5	0.97	1.058	1.031	1.076	0.994	0.969	0.951	0.991	0.944	0.063982
P56376	Acylphosphatase-1 OS=Mus musculus OX=10090 GN=Acyp1	Acyp1	11.241	25.59	48.5	4	7	4	0.999	0.934	0.992	1.159	0.96	0.92	1.004	1.072	0.969	0.61086
P56379	6.8 kDa mitochondrial proteolipid OS=Mus musculus OX=10090 GN=Mp68	Mp68	6.6979	2.312	13.8	1	5	1	0.947	1.056	0.967	0.991	1.011	0.992	1.023	1.038	1.026	0.34048
P56380	Bis(5'-nucleosyl)-tetraphosphatase [asymmetrical] OS=Mus musculus OX=10090 GN=Nudt2	Nudt2	16.989	58.502	59.2	7	13	7	0.975	0.924	0.995	0.948	0.969	1.059	1.097	1.003	1.074	0.068402
P56382	ATP synthase subunit epsilon, mitochondrial OS=Mus musculus OX=10090 GN=Atp5f1e	Atp5f1e	5.8378	2.7166	28.8	2	3	2	1.067	0.85	0.93	1.045	0.971	1.026	1.01	1.109	1.058	0.36346
P56389	Cytidine deaminase OS=Mus musculus OX=10090 GN=Cda	Cda	16.131	6.8424	20.5	2	2	2	0.92	1.049	0.916	1.202	0.968	1.044	0.933	0.997	0.965	0.67136
P56391	Cytochrome c oxidase subunit 6B1 OS=Mus musculus OX=10090 GN=Cox6b1	Cox6b1	10.071	60.033	69.8	6	9	6	1.005	1.011	1.057	1.015	0.993	0.934	0.975	0.975	0.948	0.02224
P56393	Cytochrome c oxidase subunit 7B, mitochondrial OS=Mus musculus OX=10090 GN=Cox7b	Cox7b	9.0113	4.3987	10	2	7	2	0.964	1.029	0.996	0.938	1.068	0.996	0.997	1.026	1.041	0.172375
P56395	Cytochrome b5 OS=Mus musculus OX=10090 GN=Cyb5a	Cyb5a	15.241	17.043	16.4	2	4	2	1.065	1.032	1.048	0.951	0.957	1.038	0.965	0.99	0.964	0.29284
P56399	Ubiquitin carboxyl-terminal hydrolase 5 OS=Mus musculus OX=10090 GN=Usp5	Usp5	95.832	241.84	40.1	29	56	29	0.999	0.969	0.987	0.993	0.969	1.037	1.034	1.014	1.027	0.174055
P56480	ATP synthase subunit beta, mitochondrial OS=Mus musculus OX=10090 GN=Atp5f1b	Atp5f1b	56.3	296.12	51.2	22	138	22	0.986	0.974	0.987	1.067	1.011	0.982	0.989	1.005	0.993	0.78874
P56546	C-terminal-binding protein 2 OS=Mus musculus OX=10090 GN=Ctbp2	Ctbp2	48.956	7.664	14.4	7	14	3	0.935	0.975	0.921	0.917	1.04	1.107	1.14	0.987	1.14	0.0100603
P56564	Excitatory amino acid transporter 1 OS=Mus musculus OX=10090 GN=Slc1a3	Slc1a3	59.622	88.061	19.2	8	24	6	0.995	0.941	1.008	1.005	1.071	1.018	1.022	0.937	1.025	0.4832
P56581	G/T mismatch-specific thymine DNA glycosylase OS=Mus musculus OX=10090 GN=Tdg	Tdg	46.879	5.2748	6.7	2	2	2	0.997	0.96	1.053	0.964	1.048	1.006	0.956	1.023	1.015	0.62538
P56671	Myc-associated zinc finger protein OS=Mus musculus OX=10090 GN=Maz	Maz	48.769	20.233	6.9	3	4	3	0.866	1.033	0.911	0.993	0.922	1.2	1.131	0.98	1.113	0.2055
P56695	Wolframin OS=Mus musculus OX=10090 GN=Wfs1	Wfs1	100.58	32.004	5.1	5	6	5	1.074	1.045	1.043	0.996	0.949	0.872	0.931	1.056	0.916	0.079695
P56812	Programmed cell death protein 5 OS=Mus musculus OX=10090 GN=Pdcd5	Pdcd5	14.275	8.1605	18.3	2	3	2	0.828	1.123	0.922	1.112	0.911	1.14	0.99	1.012	1.017	0.81118
P56818	Beta-secretase 1 OS=Mus musculus OX=10090 GN=Bace1	Bace1	55.747	12.699	7.4	4	6	4	0.989	1.134	0.967	0.882	0.939	1.137	1.053	0.929	1.022	0.76728
P56873	Sjoegren syndrome/scleroderma autoantigen 1 homolog OS=Mus musculus OX=10090 GN=Sssca1	Sssca1	21.336	1.5943	4	1	1	1	1.007	1.202	1.02	1.106	0.918	0.875	0.958	0.941	0.852	0.0130365
P56959	RNA-binding protein FUS OS=Mus musculus OX=10090 GN=Fus	Fus	52.673	185.8	16.4	10	45	10	0.96	0.951	0.985	0.964	1.01	1.048	1.058	1.015	1.07	0.0026037
P56960	Exosome component 10 OS=Mus musculus OX=10090 GN=Exosc10	Exosc10	100.94	10.108	4.4	3	3	3	0.942	0.862	1.233	1.04	1.046	0.922	0.974	0.978	0.961	0.71224
P57716	Nicastrin OS=Mus musculus OX=10090 GN=Ncstn	Ncstn	78.491	14.933	7.5	5	6	5	0.983	0.954	0.987	1.083	0.909	1.065	1.03	0.988	0.996	0.92438
P57722	Poly(rC)-binding protein 3 OS=Mus musculus OX=10090 GN=Pcbp3	Pcbp3	39.294	53.267	44.5	12	31	6	1.056	0.902	0.996	0.917	1.018	1.033	0.953	1.112	1.063	0.24956
P57724	Poly(rC)-binding protein 4 OS=Mus musculus OX=10090 GN=Pcbp4	Pcbp4	41.398	92.321	16.6	5	8	4	0.885	1.073	0.928	1.106	0.985	1.115	1.007	0.977	1.023	0.69354
P57746	V-type proton ATPase subunit D OS=Mus musculus OX=10090 GN=Atp6v1d	Atp6v1d	28.369	70.993	48.2	14	26	14	1.046	0.99	0.951	0.997	1.004	1.008	1.038	1.046	1.028	0.24952
P57759	Endoplasmic reticulum resident protein 29 OS=Mus musculus OX=10090 GN=Erp29	Erp29	28.823	50.243	24.8	7	20	7	1.05	1.006	1.082	1.091	0.978	0.932	0.924	0.98	0.902	0.0051574
P57776	Elongation factor 1-delta OS=Mus musculus OX=10090 GN=Eef1d	Eef1d	31.293	84.448	50.9	12	25	11	0.99	1.03	1.022	1.04	0.948	1.042	0.969	0.985	0.966	0.178176
P57780	Alpha-actinin-4 OS=Mus musculus OX=10090 GN=Actn4	Actn4	104.98	323.31	53.9	45	97	29	1.023	0.989	1.049	1.007	0.979	0.967	0.991	0.979	0.963	0.030516
P57784	U2 small nuclear ribonucleoprotein A' OS=Mus musculus OX=10090 GN=Snrpa1	Snrpa1	28.357	52.38	32.9	9	13	9	0.982	0.956	0.994	1.022	0.971	1.075	1.034	0.966	1.023	0.47516
P58021	Transmembrane 9 superfamily member 2 OS=Mus musculus OX=10090 GN=Tm9sf2	Tm9sf2	75.329	35.801	13.6	9	11	9	1.043	0.944	1.018	1.01	0.974	0.946	1.008	0.968	0.97	0.28132
P58044	Isopentenyl-diphosphate Delta-isomerase 1 OS=Mus musculus OX=10090 GN=Idi1	Idi1	26.289	67.341	27.8	8	19	8	1.034	1.076	0.982	1.094	0.943	1.008	0.92	0.961	0.915	0.028983
P58058	NAD kinase OS=Mus musculus OX=10090 GN=Nadk	Nadk	48.597	3.0493	2.7	1	1	1
P58059	28S ribosomal protein S21, mitochondrial OS=Mus musculus OX=10090 GN=Mrps21	Mrps21	10.561	7.7526	23	2	2	2	0.981	1.018	1.003	1.05	0.967	0.881	1.018	1.095	0.978	0.61308
P58064	28S ribosomal protein S6, mitochondrial OS=Mus musculus OX=10090 GN=Mrps6	Mrps6	14.308	5.7477	16.8	2	2	2	1.02	1.056	1.038	0.966	1.067	0.937	1.015	0.914	0.964	0.38488
P58069	Ras GTPase-activating protein 2 OS=Mus musculus OX=10090 GN=Rasa2	Rasa2	96.4	22.008	9.8	7	8	5
P58158	Galactosylgalactosylxylosylprotein 3-beta-glucuronosyltransferase 3 OS=Mus musculus OX=10090 GN=B3gat3	B3gat3	37.066	11.394	9.3	3	3	3	0.914	0.977	1.002	1.045	0.999	0.972	1.133	0.977	1.036	0.47482
P58252	Elongation factor 2 OS=Mus musculus OX=10090 GN=Eef2	Eef2	95.313	268.16	42.7	40	117	39	1.087	1.059	1.068	1.057	0.955	0.907	0.938	0.944	0.877	4.4296e-05
P58281	Dynamin-like 120 kDa protein, mitochondrial OS=Mus musculus OX=10090 GN=Opa1	Opa1	111.34	241.67	45.8	40	68	40	0.992	1.009	1.015	1.007	1.025	0.994	0.993	1.007	0.999	0.91028
P58389	Serine/threonine-protein phosphatase 2A activator OS=Mus musculus OX=10090 GN=Ptpa	Ptpa	36.71	54.801	37.8	10	20	10	0.966	0.987	0.97	0.997	0.995	1.041	1.033	1.036	1.047	0.0112217
P58404	Striatin-4 OS=Mus musculus OX=10090 GN=Strn4	Strn4	81.644	75.656	20.4	16	23	14	1.023	1.004	1.021	0.965	1.032	0.994	1.01	1.006	1.007	0.65352
P58501	PAX3- and PAX7-binding protein 1 OS=Mus musculus OX=10090 GN=Paxbp1	Paxbp1	104.83	10.257	5.1	4	5	4	0.98	0.979	0.994	1.005	0.954	0.998	1.09	1.019	1.026	0.4505
P58735	Sulfate anion transporter 1 OS=Mus musculus OX=10090 GN=Slc26a1	Slc26a1	75.787	2.4925	1.7	1	1	1	1.047	1.051	1.015	0.872	1.04	0.979	1.026	0.981	1.01	0.79476
P58742	Aladin OS=Mus musculus OX=10090 GN=Aaas	Aaas	59.43	44.631	12.1	5	6	5	0.947	1.015	0.93	1.102	1.061	1.079	1.07	1.045	1.065	0.192978
P58802	TBC1 domain family member 10A OS=Mus musculus OX=10090 GN=Tbc1d10a	Tbc1d10a	56.202	39.242	11.8	6	7	6	0.982	0.977	1.03	0.977	0.947	1.066	1.006	1.034	1.022	0.48544
P58854	Gamma-tubulin complex component 3 OS=Mus musculus OX=10090 GN=Tubgcp3	Tubgcp3	103.47	22.407	5.1	4	4	4	1.13	1.233	1.065	1.01	0.82	0.907	0.963	0.9	0.809	0.0080202
P58871	182 kDa tankyrase-1-binding protein OS=Mus musculus OX=10090 GN=Tnks1bp1	Tnks1bp1	181.82	131.5	13.1	17	20	17	1.054	1.022	1.044	0.962	0.993	0.947	0.999	1.012	0.968	0.24566
P59016	Vacuolar protein sorting-associated protein 33B OS=Mus musculus OX=10090 GN=Vps33b	Vps33b	70.525	69.443	24.3	15	18	15	0.975	1.004	0.982	0.993	1.005	0.975	1.031	1.019	1.019	0.2159
P59017	Bcl-2-like protein 13 OS=Mus musculus OX=10090 GN=Bcl2l13	Bcl2l13	46.719	30.527	20	8	11	8	0.993	1.01	1.007	1.059	1.018	0.97	1.037	0.995	0.988	0.56858
P59108	Copine-2 OS=Mus musculus OX=10090 GN=Cpne2	Cpne2	61.035	46.648	20.4	9	17	8	1.105	1.064	0.98	0.944	0.972	1.008	0.97	1.021	0.97	0.48648
P59114	Phosphorylated CTD-interacting factor 1 OS=Mus musculus OX=10090 GN=Pcif1	Pcif1	80.504	13.038	6.1	4	4	4	0.973	0.934	0.931	0.96	0.975	1.092	1.069	1.05	1.102	0.0114408
P59235	Nucleoporin Nup43 OS=Mus musculus OX=10090 GN=Nup43	Nup43	41.989	2.2437	2.1	1	1	1
P59242	Cingulin OS=Mus musculus OX=10090 GN=Cgn	Cgn	136.45	2.9917	0.8	1	2	1	0.909	1.163	1.018	1.037	1.11	0.944	0.912	0.927	0.943	0.42768
P59267	Palmitoyltransferase ZDHHC2 OS=Mus musculus OX=10090 GN=Zdhhc2	Zdhhc2	41.981	5.7465	7.9	3	3	3	1.099	1.133	1.023	1.019	1.027	0.868	0.843	0.998	0.874	0.049784
P59279	Ras-related protein Rab-2B OS=Mus musculus OX=10090 GN=Rab2b	Rab2b	24.198	29.115	44.9	9	23	3	1.009	1.052	0.966	0.944	1.034	1.026	1.001	0.986	1.019	0.48462
P59280	Kelch-like protein 8 OS=Mus musculus OX=10090 GN=Klhl8	Klhl8	69.787	1.7903	1.3	1	1	1
P59281	Rho GTPase-activating protein 39 OS=Mus musculus OX=10090 GN=Arhgap39	Arhgap39	125.2	61.175	17.4	16	16	16	0.941	1.002	0.908	1.008	1.09	1.069	1.025	1.021	1.09	0.027696
P59325	Eukaryotic translation initiation factor 5 OS=Mus musculus OX=10090 GN=Eif5	Eif5	48.968	113.77	30.8	13	27	13	1.047	0.989	0.978	1.012	0.963	1.023	1.007	1	0.992	0.69502
P59326	YTH domain-containing family protein 1 OS=Mus musculus OX=10090 GN=Ythdf1	Ythdf1	60.878	19.406	15.7	9	13	5	0.972	0.932	0.997	0.895	1.038	1.072	1.114	0.993	1.111	0.021423
P59470	DNA-directed RNA polymerase III subunit RPC2 OS=Mus musculus OX=10090 GN=Polr3b	Polr3b	127.71	4.07	1.5	2	2	2	0.988	1.012	0.966	0.749	1.04	1.064	1.114	1.08	1.157	0.122618
P59481	VIP36-like protein OS=Mus musculus OX=10090 GN=Lman2l	Lman2l	39.881	11.362	12.1	4	5	4	0.99	1.058	0.998	1.091	1.035	0.932	0.863	1.07	0.943	0.30016
P59644	Phosphatidylinositol 4,5-bisphosphate 5-phosphatase A OS=Mus musculus OX=10090 GN=Inpp5j	Inpp5j	107.54	5.4051	2.2	2	2	2	0.917	1.033	1.006	1.006	1.091	0.967	1.061	0.936	1.023	0.63878
P59648	FXYD domain-containing ion transport regulator 7 OS=Mus musculus OX=10090 GN=Fxyd7	Fxyd7	8.4867	3.1348	16.2	1	1	1
P59672	Ankyrin repeat and SAM domain-containing protein 1A OS=Mus musculus OX=10090 GN=Anks1a	Anks1a	125.24	26.172	8.6	8	8	8	0.962	0.91	0.921	1	0.997	1.145	1.036	1.051	1.115	0.024615
P59708	Splicing factor 3B subunit 6 OS=Mus musculus OX=10090 GN=Sf3b6	Sf3b6	14.585	16.998	27.2	3	5	3	0.895	0.972	1.054	0.959	0.941	1.113	1.029	1.004	1.053	0.32378
P59759	MKL/myocardin-like protein 2 OS=Mus musculus OX=10090 GN=Mkl2	Mkl2	117.55	34.722	9.2	8	9	8	1.084	0.967	1.037	0.99	0.978	0.968	1.061	0.957	0.972	0.44496
P59764	Dedicator of cytokinesis protein 4 OS=Mus musculus OX=10090 GN=Dock4	Dock4	226.55	42.668	8.9	18	21	15	0.926	0.988	1.035	1.096	0.993	0.928	0.949	1.013	0.96	0.37166
P59808	SAM and SH3 domain-containing protein 1 OS=Mus musculus OX=10090 GN=Sash1	Sash1	135.59	13.735	4.7	4	4	4
P59823	Interleukin-1 receptor accessory protein-like 1 OS=Mus musculus OX=10090 GN=Il1rapl1	Il1rapl1	79.629	2.2602	1.3	1	1	1
P59913	Protein-L-isoaspartate O-methyltransferase domain-containing protein 1 OS=Mus musculus OX=10090 GN=Pcmtd1	Pcmtd1	40.693	3.784	5	2	2	2	1.034	1.125	0.983	1.104	0.943	0.912	1.035	0.892	0.891	0.042199
P59999	Actin-related protein 2/3 complex subunit 4 OS=Mus musculus OX=10090 GN=Arpc4	Arpc4	19.667	61.945	40.5	7	14	7	1.003	0.99	1.03	0.969	0.995	0.97	1.014	1.009	0.999	0.95718
P60041	Somatostatin OS=Mus musculus OX=10090 GN=Sst	Sst	12.745	5.4033	9.5	1	1	1	1.003	1.004	0.874	1.075	1.131	1.017	0.931	0.981	1.026	0.67716
P60122	RuvB-like 1 OS=Mus musculus OX=10090 GN=Ruvbl1	Ruvbl1	50.213	177.64	51.8	17	30	17	0.988	1.009	0.986	1.001	0.975	1.029	1.021	1.002	1.011	0.45334
P60191	Regulating synaptic membrane exocytosis protein 4 OS=Mus musculus OX=10090 GN=Rims4	Rims4	29.329	12.198	16	3	4	3	0.76	0.998	1.114	1.187	0.926	1.092	1.043	0.91	0.978	0.92222
P60202	Myelin proteolipid protein OS=Mus musculus OX=10090 GN=Plp1	Plp1	30.077	19.282	18.8	5	9	5	0.672	1.015	0.736	2.474	0.998	0.713	0.608	0.852	0.648	0.3739
P60229	Eukaryotic translation initiation factor 3 subunit E OS=Mus musculus OX=10090 GN=Eif3e	Eif3e	52.22	71.94	35.3	15	25	15	1.005	0.995	1.037	1.004	0.957	0.986	1.015	0.983	0.975	0.145641
P60334	Cysteine dioxygenase type 1 OS=Mus musculus OX=10090 GN=Cdo1	Cdo1	23.026	1.6554	3.5	1	1	1	1.02	1.049	1.016	0.961	0.978	1.041	1	0.953	0.982	0.50692
P60335	Poly(rC)-binding protein 1 OS=Mus musculus OX=10090 GN=Pcbp1	Pcbp1	37.497	188.28	53.1	14	48	9	0.992	0.983	0.971	1.009	0.989	1.066	1.018	0.974	1.023	0.33424
P60469	Liprin-alpha-3 OS=Mus musculus OX=10090 GN=Ppfia3	Ppfia3	133.42	306.09	40.2	41	67	37	0.987	0.996	1.037	0.975	0.995	0.996	1.006	1.036	1.01	0.5783
P60487	Pyridoxal phosphate phosphatase OS=Mus musculus OX=10090 GN=Pdxp	Pdxp	31.512	48.128	42.1	11	23	11	0.986	0.979	0.971	1.016	0.998	1.031	1.013	1.015	1.027	0.069235
P60521	Gamma-aminobutyric acid receptor-associated protein-like 2 OS=Mus musculus OX=10090 GN=Gabarapl2	Gabarapl2	13.667	34.479	45.3	7	17	5	1.026	0.995	0.976	0.969	0.986	1.061	0.985	1.019	1.021	0.37074
P60603	Reactive oxygen species modulator 1 OS=Mus musculus OX=10090 GN=Romo1	Romo1	8.1828	16.731	31.6	2	4	2	1.104	1.236	0.94	0.975	1.015	0.9	0.86	0.991	0.885	0.158896
P60605	Ubiquitin-conjugating enzyme E2 G2 OS=Mus musculus OX=10090 GN=Ube2g2	Ube2g2	18.566	2.5148	9.1	1	1	1
P60670	Nuclear protein localization protein 4 homolog OS=Mus musculus OX=10090 GN=Nploc4	Nploc4	68.016	109.49	35	21	31	21	0.987	0.961	0.984	1.057	1.045	1.005	1.021	1.023	1.026	0.27352
P60755	MAM domain-containing glycosylphosphatidylinositol anchor protein 2 OS=Mus musculus OX=10090 GN=Mdga2	Mdga2	106.69	35.385	9.8	8	10	8	0.981	1.028	0.932	1.061	1.005	1.121	0.905	1.002	1.008	0.9114
P60761	Neurogranin OS=Mus musculus OX=10090 GN=Nrgn	Nrgn	7.4963	18.495	19.2	2	7	2	0.876	0.856	1.153	0.911	1.12	0.871	1.112	0.976	1.075	0.44746
P60762	Mortality factor 4-like protein 1 OS=Mus musculus OX=10090 GN=Morf4l1	Morf4l1	41.492	10.152	6.4	2	3	2	0.977	1.068	1.03	0.981	0.922	1.068	1.042	0.937	0.979	0.60854
P60764	Ras-related C3 botulinum toxin substrate 3 OS=Mus musculus OX=10090 GN=Rac3	Rac3	21.379	27.505	49.5	8	17	3	1.043	0.988	0.938	1.062	0.99	1.081	0.984	0.967	0.998	0.95912
P60766	Cell division control protein 42 homolog OS=Mus musculus OX=10090 GN=Cdc42	Cdc42	21.258	34.405	41.4	7	22	6	0.923	1.063	1.03	0.999	1.068	1.041	0.981	0.993	1.017	0.64534
P60824	Cold-inducible RNA-binding protein OS=Mus musculus OX=10090 GN=Cirbp	Cirbp	18.607	31.668	31.4	5	16	5	0.873	0.827	0.81	0.81	1.104	1.284	1.202	1.079	1.406	0.00024124
P60843	Eukaryotic initiation factor 4A-I OS=Mus musculus OX=10090 GN=Eif4a1	Eif4a1	46.153	152.64	50.2	23	68	10	1.006	0.957	1.001	0.997	0.994	1.005	1.04	0.997	1.019	0.27052
P60853	Leucine zipper putative tumor suppressor 1 OS=Mus musculus OX=10090 GN=Lzts1	Lzts1	67.289	31.149	10.9	6	6	6	1.071	1.045	0.978	0.899	1.057	0.939	0.948	1.078	1.007	0.89128
P60867	40S ribosomal protein S20 OS=Mus musculus OX=10090 GN=Rps20	Rps20	13.373	16.103	28.6	4	7	4	1	0.997	1.126	1.052	0.901	1.01	0.906	1.06	0.929	0.178559
P60879	Synaptosomal-associated protein 25 OS=Mus musculus OX=10090 GN=Snap25	Snap25	23.315	260.03	61.7	11	59	10	0.985	0.982	0.981	1.047	0.962	1.022	0.977	1.059	1.006	0.83426
P60882	Multiple epidermal growth factor-like domains protein 8 OS=Mus musculus OX=10090 GN=Megf8	Megf8	297.48	9.313	1.3	3	3	3	0.982	1.134	0.944	0.975	0.998	1.048	0.958	0.986	0.989	0.84446
P60898	DNA-directed RNA polymerase II subunit RPB9 OS=Mus musculus OX=10090 GN=Polr2i	Polr2i	14.523	5.2981	13.6	1	1	1	1.086	1.015	0.985	0.994	0.922	0.929	0.919	1.16	0.963	0.52022
P60904	DnaJ homolog subfamily C member 5 OS=Mus musculus OX=10090 GN=Dnajc5	Dnajc5	22.101	53.463	20.7	6	14	6	1.004	0.995	1.017	0.974	1.005	0.996	0.985	1.011	1.002	0.87014
P61021	Ras-related protein Rab-5B OS=Mus musculus OX=10090 GN=Rab5b	Rab5b	23.707	91.88	54	9	26	6	1.01	1.018	0.964	0.981	0.982	1.002	1.028	1.002	1.01	0.53522
P61022	Calcineurin B homologous protein 1 OS=Mus musculus OX=10090 GN=Chp1	Chp1	22.432	42.765	44.1	7	10	7	0.997	1.031	0.982	1.02	1	0.962	1.023	0.998	0.988	0.50932
P61027	Ras-related protein Rab-10 OS=Mus musculus OX=10090 GN=Rab10	Rab10	22.541	107.99	53	13	27	11	0.988	1.051	1.006	0.907	1.071	0.993	1.01	0.966	1.022	0.56996
P61028	Ras-related protein Rab-8B OS=Mus musculus OX=10090 GN=Rab8b	Rab8b	23.603	27.169	40.6	9	17	4	1.012	1.004	0.971	0.983	1.006	1.06	0.966	1.036	1.025	0.32232
P61079	Ubiquitin-conjugating enzyme E2 D3 OS=Mus musculus OX=10090 GN=Ube2d3	Ube2d3	16.687	-2	24.5	3	6	1	0.96	0.965	1.052	1.009	0.99	1.042	0.94	1.052	1.01	0.79438
P61080	Ubiquitin-conjugating enzyme E2 D1 OS=Mus musculus OX=10090 GN=Ube2d1	Ube2d1	16.602	7.672	24.5	3	6	2	0.966	0.993	0.981	0.941	0.979	1.011	1.009	1.011	1.033	0.05796
P61082	NEDD8-conjugating enzyme Ubc12 OS=Mus musculus OX=10090 GN=Ube2m	Ube2m	20.9	57.241	46.4	11	21	11	0.986	1.014	1.004	0.974	0.983	0.994	1.002	0.998	1	0.98802
P61087	Ubiquitin-conjugating enzyme E2 K OS=Mus musculus OX=10090 GN=Ube2k	Ube2k	22.406	41.083	33.5	6	12	6	1.035	1.036	1.011	1.041	0.942	0.978	0.919	0.956	0.92	0.00127703
P61089	Ubiquitin-conjugating enzyme E2 N OS=Mus musculus OX=10090 GN=Ube2n	Ube2n	17.138	35.86	44.7	9	25	9	0.958	1.038	0.999	1.087	0.987	0.954	0.962	1.042	0.966	0.35394
P61148	Fibroblast growth factor 1 OS=Mus musculus OX=10090 GN=Fgf1	Fgf1	17.417	10.002	21.3	3	3	3	0.918	0.876	0.997	1.243	1.084	1.051	0.903	1.032	1.009	0.8623
P61161	Actin-related protein 2 OS=Mus musculus OX=10090 GN=Actr2	Actr2	44.76	120.93	38.6	14	47	14	1.028	0.976	1.011	0.94	0.989	0.995	1.038	1.01	1.019	0.41696
P61164	Alpha-centractin OS=Mus musculus OX=10090 GN=Actr1a	Actr1a	42.613	138.65	26.6	9	18	4	1.04	1.019	1.013	0.952	0.994	1.011	1.029	0.978	0.997	0.9088
P61202	COP9 signalosome complex subunit 2 OS=Mus musculus OX=10090 GN=Cops2	Cops2	51.596	82.433	28.9	13	27	13	0.998	1.005	0.938	1.038	1.012	1.016	0.977	1.011	1.009	0.68546
P61208	ADP-ribosylation factor-like protein 4C OS=Mus musculus OX=10090 GN=Arl4c	Arl4c	21.487	10.47	16.1	3	3	3	1.057	1.188	1.075	1.144	0.836	0.927	0.872	0.927	0.798	0.00090026
P61211	ADP-ribosylation factor-like protein 1 OS=Mus musculus OX=10090 GN=Arl1	Arl1	20.411	30.486	33.1	5	12	5	1.066	1.051	0.987	1.035	1.014	0.987	0.889	0.991	0.938	0.101718
P61215	Carbonic anhydrase-related protein 10 OS=Mus musculus OX=10090 GN=Ca10	Ca10	37.562	6.1377	11.9	3	3	3
P61222	ATP-binding cassette sub-family E member 1 OS=Mus musculus OX=10090 GN=Abce1	Abce1	67.314	77.905	28.5	16	24	16	1.034	1.017	0.987	1.028	0.983	0.949	0.969	1.002	0.96	0.038024
P61226	Ras-related protein Rap-2b OS=Mus musculus OX=10090 GN=Rap2b	Rap2b	20.504	30.08	36.1	6	10	4	1.041	1.033	1.017	0.99	0.992	1.02	1.003	0.94	0.969	0.179858
P61255	60S ribosomal protein L26 OS=Mus musculus OX=10090 GN=Rpl26	Rpl26	17.258	14.058	29.7	5	9	5	0.987	1.06	1.085	1.038	0.903	1.023	0.965	0.951	0.921	0.045198
P61264	Syntaxin-1B OS=Mus musculus OX=10090 GN=Stx1b	Stx1b	33.244	151.78	47.2	17	47	15	0.941	1.016	0.978	1.045	1.018	1.005	0.97	1.051	1.016	0.58398
P61290	Proteasome activator complex subunit 3 OS=Mus musculus OX=10090 GN=Psme3	Psme3	29.506	57.663	34.3	9	14	9	1.011	1.029	1.004	1.049	0.979	0.932	0.974	0.958	0.939	0.0053154
P61294	Ras-related protein Rab-6B OS=Mus musculus OX=10090 GN=Rab6b	Rab6b	23.461	36.701	53.8	11	39	5	0.971	1.027	1.023	0.972	1.022	0.984	1.04	1.014	1.017	0.41818
P61329	Fibroblast growth factor 12 OS=Mus musculus OX=10090 GN=Fgf12	Fgf12	27.399	6.0255	18.9	4	5	4	1.001	1.07	0.987	1.101	0.96	0.899	0.965	1.036	0.928	0.103998
P61358	60S ribosomal protein L27 OS=Mus musculus OX=10090 GN=Rpl27	Rpl27	15.798	89.42	36	4	8	4	1.028	1.018	1.133	0.989	0.907	1.034	0.97	0.935	0.923	0.096816
P61458	Pterin-4-alpha-carbinolamine dehydratase OS=Mus musculus OX=10090 GN=Pcbd1	Pcbd1	11.985	7.3831	28.8	3	3	2	1.006	0.986	0.894	1.046	0.971	1.07	1.045	1.006	1.041	0.3426
P61460	GATOR complex protein DEPDC5 OS=Mus musculus OX=10090 GN=Depdc5	Depdc5	180.38	2.2937	0.8	1	1	1
P61600	N-alpha-acetyltransferase 20 OS=Mus musculus OX=10090 GN=Naa20	Naa20	20.368	13.934	24.2	4	5	4	1.055	0.993	1.114	0.994	0.993	0.955	0.889	1.011	0.926	0.09982
P61620	Protein transport protein Sec61 subunit alpha isoform 1 OS=Mus musculus OX=10090 GN=Sec61a1	Sec61a1	52.264	19.799	13.9	7	8	3	1.042	0.969	1.144	1.059	0.996	0.901	0.978	0.918	0.9	0.046617
P61750	ADP-ribosylation factor 4 OS=Mus musculus OX=10090 GN=Arf4	Arf4	20.396	26.63	42.8	7	23	3	0.977	0.985	0.977	1.054	1.002	1.034	1.032	1.007	1.021	0.34216
P61759	Prefoldin subunit 3 OS=Mus musculus OX=10090 GN=Vbp1	Vbp1	22.435	44.378	48.5	11	20	11	0.929	0.975	1.067	1.047	0.984	1.048	0.957	0.99	0.99	0.82204
P61804	Dolichyl-diphosphooligosaccharide--protein glycosyltransferase subunit DAD1 OS=Mus musculus OX=10090 GN=Dad1	Dad1	12.497	11.525	19.5	2	3	2	1.058	0.946	0.973	0.977	0.897	1.142	0.999	1.026	1.028	0.6706
P61922	4-aminobutyrate aminotransferase, mitochondrial OS=Mus musculus OX=10090 GN=Abat	Abat	56.451	236.43	49.8	22	52	22	0.968	1.003	0.961	1.117	1.013	0.989	0.966	1.005	0.981	0.65074
P61924	Coatomer subunit zeta-1 OS=Mus musculus OX=10090 GN=Copz1	Copz1	20.198	29.985	22.6	3	7	3	1.104	1.049	0.986	1.009	0.918	1.006	0.987	0.993	0.941	0.110022
P61957	Small ubiquitin-related modifier 2 OS=Mus musculus OX=10090 GN=Sumo2	Sumo2	10.871	12.867	23.2	2	6	1	0.906	1.024	1.063	1.12	0.98	1.001	0.969	0.957	0.95	0.3699
P61961	Ubiquitin-fold modifier 1 OS=Mus musculus OX=10090 GN=Ufm1	Ufm1	9.1175	13.165	25.9	2	3	2	0.996	1.018	1.04	1.044	0.826	0.99	0.985	1.014	0.931	0.22154
P61963	DDB1- and CUL4-associated factor 7 OS=Mus musculus OX=10090 GN=Dcaf7	Dcaf7	38.926	52.326	32.2	11	17	11	0.969	1.009	0.952	0.99	0.996	1.031	1.004	1.024	1.034	0.064415
P61965	WD repeat-containing protein 5 OS=Mus musculus OX=10090 GN=Wdr5	Wdr5	36.588	58.502	24.3	7	10	7	1.005	1.008	1.027	0.993	1.002	1.032	1.023	1.014	1.009	0.35602
P61967	AP-1 complex subunit sigma-1A OS=Mus musculus OX=10090 GN=Ap1s1	Ap1s1	18.733	4.6231	11.4	2	2	2	0.944	0.998	1.047	0.957	1.066	1.056	0.904	1.036	1.029	0.56206
P61971	Nuclear transport factor 2 OS=Mus musculus OX=10090 GN=Nutf2	Nutf2	14.478	23.623	35.4	4	13	4	1.016	0.939	0.955	1.041	0.962	1.031	1.037	1.071	1.038	0.30518
P61979	Heterogeneous nuclear ribonucleoprotein K OS=Mus musculus OX=10090 GN=Hnrnpk	Hnrnpk	50.976	167.42	30.5	15	53	15	0.994	0.921	0.989	0.988	1.008	1.035	1.057	1.011	1.056	0.041663
P61982	14-3-3 protein gamma OS=Mus musculus OX=10090 GN=Ywhag	Ywhag	28.302	118.56	53	17	109	10	0.993	1.003	0.991	0.951	1.031	1.046	1.037	1	1.045	0.028755
P62069	Ubiquitin carboxyl-terminal hydrolase 46 OS=Mus musculus OX=10090 GN=Usp46	Usp46	42.442	15.764	14.2	6	10	4	1	0.994	1.024	1.002	1.096	0.966	0.967	0.959	0.992	0.79066
P62071	Ras-related protein R-Ras2 OS=Mus musculus OX=10090 GN=Rras2	Rras2	23.399	63.571	47.5	9	20	7	0.979	1.013	0.949	0.89	1.005	1.062	1.065	0.941	1.063	0.177964
P62073	Mitochondrial import inner membrane translocase subunit Tim10 OS=Mus musculus OX=10090 GN=Timm10	Timm10	10.333	1.6342	8.9	1	1	1
P62077	Mitochondrial import inner membrane translocase subunit Tim8 B OS=Mus musculus OX=10090 GN=Timm8b	Timm8b	9.2864	2.0004	13.3	1	1	1
P62082	40S ribosomal protein S7 OS=Mus musculus OX=10090 GN=Rps7	Rps7	22.127	11.437	22.7	5	8	5	1.061	1.016	1.047	1.015	0.97	0.957	0.967	0.917	0.921	0.0028792
P62137	Serine/threonine-protein phosphatase PP1-alpha catalytic subunit OS=Mus musculus OX=10090 GN=Ppp1ca	Ppp1ca	37.54	91.266	43.3	13	29	5	1.007	0.946	1.025	1.037	1.022	0.94	1.031	0.96	0.985	0.62648
P62141	Serine/threonine-protein phosphatase PP1-beta catalytic subunit OS=Mus musculus OX=10090 GN=Ppp1cb	Ppp1cb	37.186	32.541	39.4	12	29	4	1.004	0.966	0.975	0.96	1.058	1.014	1.02	1.004	1.049	0.0197557
P62192	26S proteasome regulatory subunit 4 OS=Mus musculus OX=10090 GN=Psmc1	Psmc1	49.184	165.59	53	22	44	22	0.993	0.98	1.007	1.014	1.002	1.004	1.001	1.012	1.006	0.45846
P62196	26S proteasome regulatory subunit 8 OS=Mus musculus OX=10090 GN=Psmc5	Psmc5	45.626	136.16	55.4	20	44	20	1.018	0.97	1.012	0.994	0.986	0.979	1.009	1.019	1	0.98892
P62242	40S ribosomal protein S8 OS=Mus musculus OX=10090 GN=Rps8	Rps8	24.205	72.554	51	9	19	9	1.006	1.034	1.058	1.023	0.914	0.999	0.95	0.955	0.926	0.0107777
P62245	40S ribosomal protein S15a OS=Mus musculus OX=10090 GN=Rps15a	Rps15a	14.839	18.158	30	4	12	4	0.982	1.006	1.043	0.981	0.929	0.991	1.003	1.1	1.003	0.9752
P62254	Ubiquitin-conjugating enzyme E2 G1 OS=Mus musculus OX=10090 GN=Ube2g1	Ube2g1	19.509	20.249	31.8	5	6	5	1.05	1.021	1.046	1.057	0.96	0.937	0.904	0.998	0.91	0.0052017
P62257	Ubiquitin-conjugating enzyme E2 H OS=Mus musculus OX=10090 GN=Ube2h	Ube2h	20.655	31.177	35.5	6	8	6	1.104	1.082	1.056	1.02	0.942	0.928	0.909	0.922	0.868	0.00027684
P62259	14-3-3 protein epsilon OS=Mus musculus OX=10090 GN=Ywhae	Ywhae	29.174	205.36	75.3	24	181	21	1.016	0.969	1.004	0.989	0.987	0.997	1.027	1.001	1.009	0.54256
P62264	40S ribosomal protein S14 OS=Mus musculus OX=10090 GN=Rps14	Rps14	16.273	61.849	39.1	7	14	7	1.036	0.942	1.036	0.986	0.951	1.076	0.971	0.995	0.998	0.95504
P62267	40S ribosomal protein S23 OS=Mus musculus OX=10090 GN=Rps23	Rps23	15.807	27.566	30.1	6	12	6	1.063	1.108	1.086	0.993	0.953	0.936	0.987	0.921	0.893	0.0071431
P62270	40S ribosomal protein S18 OS=Mus musculus OX=10090 GN=Rps18	Rps18	17.718	24.602	39.5	8	20	8	1.069	1.059	1.044	0.974	0.953	1.02	0.935	0.951	0.931	0.045861
P62274	40S ribosomal protein S29 OS=Mus musculus OX=10090 GN=Rps29	Rps29	6.6767	12.928	76.8	5	7	5	0.958	0.948	1.001	0.976	1.072	1.048	1.005	0.982	1.058	0.052819
P62281	40S ribosomal protein S11 OS=Mus musculus OX=10090 GN=Rps11	Rps11	18.431	39.061	48.7	9	17	9	1.013	1.075	1.088	0.986	0.931	0.951	1.014	0.959	0.926	0.042819
P62301	40S ribosomal protein S13 OS=Mus musculus OX=10090 GN=Rps13	Rps13	17.222	33.447	36.4	6	9	6	0.979	1.089	1.104	0.989	0.821	0.985	1.002	0.98	0.91	0.140699
P62305	Small nuclear ribonucleoprotein E OS=Mus musculus OX=10090 GN=Snrpe	Snrpe	10.803	6.3055	25	2	3	2	0.982	0.889	0.89	1.053	0.861	1.072	1.179	1.099	1.104	0.2769
P62307	Small nuclear ribonucleoprotein F OS=Mus musculus OX=10090 GN=Snrpf	Snrpf	9.7251	-2	10.5	1	1	1	0.874	0.925	1.128	0.92	1.175	1.085	0.94	0.953	1.08	0.35912
P62309	Small nuclear ribonucleoprotein G OS=Mus musculus OX=10090 GN=Snrpg	Snrpg	8.496	7.0161	34.2	3	9	3	1.014	0.971	0.932	0.987	0.981	1.047	1.048	0.98	1.039	0.19292
P62311	U6 snRNA-associated Sm-like protein LSm3 OS=Mus musculus OX=10090 GN=Lsm3	Lsm3	11.845	7.3077	11.8	1	2	1	0.957	0.954	1.008	1.008	0.985	1.098	0.966	1.038	1.041	0.27662
P62313	U6 snRNA-associated Sm-like protein LSm6 OS=Mus musculus OX=10090 GN=Lsm6	Lsm6	9.1275	14.238	33.8	4	7	4	0.948	1.072	1.003	0.969	1.006	1.082	1.072	0.95	1.03	0.50326
P62315	Small nuclear ribonucleoprotein Sm D1 OS=Mus musculus OX=10090 GN=Snrpd1	Snrpd1	13.281	20.138	10.9	2	2	2	0.933	1.085	0.948	0.953	0.972	1.03	1.092	1.014	1.048	0.30024
P62317	Small nuclear ribonucleoprotein Sm D2 OS=Mus musculus OX=10090 GN=Snrpd2	Snrpd2	13.527	61.9	61.9	8	26	8	0.954	0.948	1.002	1.048	1	1.037	1.02	0.985	1.023	0.40776
P62320	Small nuclear ribonucleoprotein Sm D3 OS=Mus musculus OX=10090 GN=Snrpd3	Snrpd3	13.916	75.018	23.8	2	8	2	0.991	0.964	1.1	0.968	0.974	1.058	1.052	0.886	0.987	0.79104
P62331	ADP-ribosylation factor 6 OS=Mus musculus OX=10090 GN=Arf6	Arf6	20.082	45.119	32.6	4	10	4	1.006	0.98	0.982	1.045	1.039	1.003	1.002	0.988	1.005	0.7993
P62334	26S proteasome regulatory subunit 10B OS=Mus musculus OX=10090 GN=Psmc6	Psmc6	44.172	169.52	58.4	22	52	22	0.965	0.988	1.007	0.978	1.015	1.02	1.033	1.015	1.037	0.0105156
P62342	Thioredoxin reductase-like selenoprotein T OS=Mus musculus OX=10090 GN=Selenot	Selenot	22.292	17.842	15.4	3	4	3	1.074	0.99	1.106	0.995	1.02	1	0.879	0.941	0.922	0.109199
P62482	Voltage-gated potassium channel subunit beta-2 OS=Mus musculus OX=10090 GN=Kcnab2	Kcnab2	41.021	30.847	23.7	9	11	8	0.976	0.977	0.995	1.023	1.002	0.966	0.958	1.098	1.013	0.73038
P62484	Abl interactor 2 OS=Mus musculus OX=10090 GN=Abi2	Abi2	49.387	44.961	22	9	18	6	0.979	0.966	0.944	0.961	1.018	1.042	1.081	1.03	1.083	0.00179756
P62488	DNA-directed RNA polymerase II subunit RPB7 OS=Mus musculus OX=10090 GN=Polr2g	Polr2g	19.294	18.964	18.6	3	4	3	1.068	1.088	0.978	0.945	0.992	0.953	0.973	1.017	0.965	0.38356
P62492	Ras-related protein Rab-11A OS=Mus musculus OX=10090 GN=Rab11a	Rab11a	24.393	15.529	54.6	10	22	1	1.108	1.113	0.969	0.868	1.151	1.032	0.964	0.809	0.975	0.77606
P62500	TSC22 domain family protein 1 OS=Mus musculus OX=10090 GN=Tsc22d1	Tsc22d1	109.81	35.614	9.7	9	10	7	0.852	0.888	1.011	0.938	0.998	1.152	1.034	1.138	1.172	0.021183
P62627	Dynein light chain roadblock-type 1 OS=Mus musculus OX=10090 GN=Dynlrb1	Dynlrb1	10.99	97.921	34.4	2	7	2	0.93	1.052	0.996	0.994	0.964	1.035	0.986	1.061	1.019	0.59632
P62631	Elongation factor 1-alpha 2 OS=Mus musculus OX=10090 GN=Eef1a2	Eef1a2	50.454	76.573	49.2	24	66	13	0.957	1.025	1.042	1.026	0.992	0.96	0.963	1.011	0.969	0.22334
P62700	Protein yippee-like 5 OS=Mus musculus OX=10090 GN=Ypel5	Ypel5	13.841	12.67	18.2	2	2	2	1.04	1.021	1.032	1.034	0.829	1.027	1.053	0.988	0.944	0.33818
P62702	40S ribosomal protein S4, X isoform OS=Mus musculus OX=10090 GN=Rps4x	Rps4x	29.597	77.497	43.3	12	26	12	1.073	1.135	1.051	0.942	0.918	0.97	0.97	0.929	0.901	0.050039
P62715	Serine/threonine-protein phosphatase 2A catalytic subunit beta isoform OS=Mus musculus OX=10090 GN=Ppp2cb	Ppp2cb	35.575	13.644	54.7	14	45	2	0.964	1.05	1.056	0.878	1.017	1.065	1.02	0.999	1.039	0.40716
P62717	60S ribosomal protein L18a OS=Mus musculus OX=10090 GN=Rpl18a	Rpl18a	20.732	45.004	34.7	6	11	6	1.111	1.073	1.089	0.972	0.897	0.91	1.031	0.944	0.891	0.036441
P62743	AP-2 complex subunit sigma OS=Mus musculus OX=10090 GN=Ap2s1	Ap2s1	17.018	22.181	39.4	6	14	6	0.898	0.947	0.957	0.991	0.988	1.069	1.041	1.13	1.115	0.020536
P62746	Rho-related GTP-binding protein RhoB OS=Mus musculus OX=10090 GN=Rhob	Rhob	22.123	30.995	35.7	7	16	5	1.034	1.006	0.954	0.981	1.029	0.988	1.004	1.034	1.02	0.35736
P62748	Hippocalcin-like protein 1 OS=Mus musculus OX=10090 GN=Hpcal1	Hpcal1	22.338	39.623	64.2	12	37	4	0.9	0.996	0.804	1.229	1.034	1.063	0.931	1.016	1.029	0.68672
P62751	60S ribosomal protein L23a OS=Mus musculus OX=10090 GN=Rpl23a	Rpl23a	17.695	26.074	37.8	8	15	8	1.024	1.142	1.121	0.906	0.975	0.992	0.948	0.925	0.916	0.17748
P62754	40S ribosomal protein S6 OS=Mus musculus OX=10090 GN=Rps6	Rps6	28.68	43.34	22.9	5	13	5	1.02	1.079	1.167	1.037	0.812	0.957	1.02	0.851	0.846	0.030504
P62761	Visinin-like protein 1 OS=Mus musculus OX=10090 GN=Vsnl1	Vsnl1	22.142	93.085	81.7	16	58	13	0.953	1.019	0.975	0.987	1.013	1.006	0.995	1.056	1.035	0.124703
P62774	Myotrophin OS=Mus musculus OX=10090 GN=Mtpn	Mtpn	12.861	37.45	39	5	12	5	0.938	1.008	0.992	0.93	1.041	1.066	1.027	0.968	1.06	0.086682
P62806	Histone H4 OS=Mus musculus OX=10090 GN=Hist1h4a	Hist1h4a	11.367	70.259	60.2	10	52	10	0.976	0.705	0.862	1.234	1.103	0.938	0.98	1.192	1.115	0.3697
P62812	Gamma-aminobutyric acid receptor subunit alpha-1 OS=Mus musculus OX=10090 GN=Gabra1	Gabra1	51.753	46.602	29	14	20	6	0.977	0.945	0.986	0.942	1.084	1.105	1.04	0.933	1.081	0.103016
P62814	V-type proton ATPase subunit B, brain isoform OS=Mus musculus OX=10090 GN=Atp6v1b2	Atp6v1b2	56.55	282.87	54.8	24	73	24	0.975	0.967	0.992	1.017	0.996	0.996	1.013	1.043	1.025	0.170143
P62821	Ras-related protein Rab-1A OS=Mus musculus OX=10090 GN=Rab1A	Rab1A	22.677	138.42	60.5	11	41	6	1.035	1.027	1.003	0.991	1	0.994	0.997	0.985	0.98	0.112036
P62823	Ras-related protein Rab-3C OS=Mus musculus OX=10090 GN=Rab3c	Rab3c	25.872	72.74	31.7	6	23	4	0.971	1.004	0.99	1.123	1.019	0.981	0.999	1.01	0.981	0.63056
P62827	GTP-binding nuclear protein Ran OS=Mus musculus OX=10090 GN=Ran	Ran	24.423	58.016	34.7	9	22	9	1.052	1.021	0.998	1.026	0.97	0.985	0.968	0.977	0.952	0.005261
P62830	60S ribosomal protein L23 OS=Mus musculus OX=10090 GN=Rpl23	Rpl23	14.865	55.858	55.7	7	22	7	1.021	1.065	1.025	0.944	0.978	1.013	0.986	0.965	0.972	0.3531
P62835	Ras-related protein Rap-1A OS=Mus musculus OX=10090 GN=Rap1a	Rap1a	20.987	20.058	38	8	14	3	0.994	1.006	1.023	1.081	0.999	0.948	0.971	0.992	0.953	0.071217
P62838	Ubiquitin-conjugating enzyme E2 D2 OS=Mus musculus OX=10090 GN=Ube2d2	Ube2d2	16.735	18.571	24.5	3	6	1	0.907	0.999	1.029	1.152	1.031	1.081	0.957	0.867	0.963	0.60618
P62843	40S ribosomal protein S15 OS=Mus musculus OX=10090 GN=Rps15	Rps15	17.04	16.316	28.3	3	6	3	1.082	1.083	1.044	0.982	0.981	0.944	0.946	0.901	0.9	0.0108388
P62849	40S ribosomal protein S24 OS=Mus musculus OX=10090 GN=Rps24	Rps24	15.423	35.574	33.8	4	15	4	1.073	1.11	1.109	0.938	0.959	0.901	0.977	0.929	0.89	0.04004
P62852	40S ribosomal protein S25 OS=Mus musculus OX=10090 GN=Rps25	Rps25	13.742	14.735	29.6	5	13	5	1.196	1.232	1.005	0.911	0.989	0.88	0.972	0.837	0.847	0.097498
P62855	40S ribosomal protein S26 OS=Mus musculus OX=10090 GN=Rps26	Rps26	13.015	28.036	37.4	4	5	4	1.029	1.005	1.213	1.042	0.981	0.89	0.954	0.961	0.883	0.042181
P62858	40S ribosomal protein S28 OS=Mus musculus OX=10090 GN=Rps28	Rps28	7.8409	19.584	46.4	3	10	3	0.941	1.119	1.008	0.886	1.058	0.967	1.064	0.955	1.023	0.67938
P62862	40S ribosomal protein S30 OS=Mus musculus OX=10090 GN=Fau	Fau	6.6478	3.4103	30.5	2	4	2	1.256	1.334	0.934	0.735	1.149	0.906	0.929	0.775	0.883	0.52888
P62869	Elongin-B OS=Mus musculus OX=10090 GN=Elob	Elob	13.17	106.94	89.8	10	21	10	1.037	1.033	1.008	1.001	0.994	0.95	0.971	0.981	0.955	0.0122629
P62874	Guanine nucleotide-binding protein G(I)/G(S)/G(T) subunit beta-1 OS=Mus musculus OX=10090 GN=Gnb1	Gnb1	37.377	205.44	43.5	12	58	5	1.012	0.964	1.014	0.899	1.002	1.015	1.058	1.023	1.054	0.1314
P62876	DNA-directed RNA polymerases I, II, and III subunit RPABC5 OS=Mus musculus OX=10090 GN=Polr2l	Polr2l	7.645	2.5272	13.4	1	1	1	1.079	1.021	0.932	1.067	1.011	1.02	0.943	0.946	0.956	0.30966
P62878	E3 ubiquitin-protein ligase RBX1 OS=Mus musculus OX=10090 GN=Rbx1	Rbx1	12.274	2.5518	13	2	2	2	1.106	0.968	0.962	0.891	1.092	0.947	1.026	1.013	1.038	0.48846
P62880	Guanine nucleotide-binding protein G(I)/G(S)/G(T) subunit beta-2 OS=Mus musculus OX=10090 GN=Gnb2	Gnb2	37.331	112.23	34.4	10	46	3	0.978	0.995	0.898	0.981	1.021	1.008	1.04	1.025	1.063	0.043584
P62881	Guanine nucleotide-binding protein subunit beta-5 OS=Mus musculus OX=10090 GN=Gnb5	Gnb5	43.565	62.977	25.3	11	19	11	1.057	1.01	0.979	1.023	1.01	1.025	1.024	0.968	0.99	0.63888
P62889	60S ribosomal protein L30 OS=Mus musculus OX=10090 GN=Rpl30	Rpl30	12.784	36.958	50.4	7	21	7	1.012	1.069	1.088	0.907	0.985	0.996	1.002	0.914	0.956	0.387
P62897	Cytochrome c, somatic OS=Mus musculus OX=10090 GN=Cycs	Cycs	11.605	44.74	61.9	7	11	7	0.93	0.853	1.373	1.477	0.937	0.785	0.839	0.829	0.732	0.090884
P62900	60S ribosomal protein L31 OS=Mus musculus OX=10090 GN=Rpl31	Rpl31	14.463	13.322	33.6	5	9	5	1.05	1.084	1.03	0.958	0.929	1.01	0.959	0.926	0.928	0.064618
P62908	40S ribosomal protein S3 OS=Mus musculus OX=10090 GN=Rps3	Rps3	26.674	97.596	66.3	17	46	17	1.072	1.012	1.034	1.004	0.979	0.976	0.979	0.957	0.944	0.0104635
P62911	60S ribosomal protein L32 OS=Mus musculus OX=10090 GN=Rpl32	Rpl32	15.86	20.036	43.7	6	10	6	1.073	1.078	1.044	1.017	0.929	0.993	0.945	0.927	0.901	0.0024594
P62915	Transcription initiation factor IIB OS=Mus musculus OX=10090 GN=Gtf2b	Gtf2b	34.819	9.8231	16.1	4	4	4	1.029	1.127	0.945	1.181	0.964	0.855	0.904	1.017	0.873	0.075056
P62918	60S ribosomal protein L8 OS=Mus musculus OX=10090 GN=Rpl8	Rpl8	28.024	27.463	33.5	7	8	7	0.983	1.038	1.122	1.033	0.891	1.015	0.98	0.929	0.914	0.062637
P62960	Nuclease-sensitive element-binding protein 1 OS=Mus musculus OX=10090 GN=Ybx1	Ybx1	35.73	264.66	42.5	9	30	6	1.029	1.054	1.014	1	0.971	0.989	1.071	0.924	0.965	0.30656
P62965	Cellular retinoic acid-binding protein 1 OS=Mus musculus OX=10090 GN=Crabp1	Crabp1	15.591	29.177	42.3	6	9	5	0.896	0.993	0.902	0.952	1.05	1.063	1.11	1.066	1.146	0.0023232
P62983	Ubiquitin-40S ribosomal protein S27a OS=Mus musculus OX=10090 GN=Rps27a	Rps27a	17.951	99.685	50.6	7	62	2	0.949	1.012	1.042	1.038	1.057	1.004	0.999	0.981	1	0.9913
P62984	Ubiquitin-60S ribosomal protein L40 OS=Mus musculus OX=10090 GN=Uba52	Uba52	14.728	6.0635	44.5	6	59	1	0.814	0.886	1.277	1.066	1.082	0.956	1.021	0.899	0.979	0.9408
P62996	Transformer-2 protein homolog beta OS=Mus musculus OX=10090 GN=Tra2b	Tra2b	33.665	38.385	17.4	5	12	4	1.001	0.924	0.921	0.992	0.974	1.103	1.086	1.014	1.088	0.062237
P63001	Ras-related C3 botulinum toxin substrate 1 OS=Mus musculus OX=10090 GN=Rac1	Rac1	21.45	73.202	50	10	26	5	1.005	0.989	0.998	1.02	1.008	0.985	1.075	1.017	1.018	0.4055
P63005	Platelet-activating factor acetylhydrolase IB subunit alpha OS=Mus musculus OX=10090 GN=Pafah1b1	Pafah1b1	46.67	225.31	49.5	21	59	21	0.987	0.984	0.982	0.983	1.01	1.027	1.034	1.009	1.037	0.0102784
P63011	Ras-related protein Rab-3A OS=Mus musculus OX=10090 GN=Rab3a	Rab3a	24.97	91.392	37.3	7	32	6	1.07	0.993	1.024	1.031	1.009	0.94	0.978	1.02	0.958	0.125195
P63017	Heat shock cognate 71 kDa protein OS=Mus musculus OX=10090 GN=Hspa8	Hspa8	70.87	323.31	66.1	47	287	33	1.031	1.028	1.054	1.031	0.966	0.95	0.965	0.965	0.928	4.0976e-05
P63028	Translationally-controlled tumor protein OS=Mus musculus OX=10090 GN=Tpt1	Tpt1	19.462	46.1	40.1	7	24	7	1.038	0.967	1.018	1.054	0.951	0.966	0.982	0.948	0.944	0.030344
P63030	Mitochondrial pyruvate carrier 1 OS=Mus musculus OX=10090 GN=Mpc1	Mpc1	12.454	6.6153	22	4	6	4	1.091	0.993	0.965	1.057	0.942	0.95	0.962	1.026	0.945	0.152139
P63034	Cytohesin-2 OS=Mus musculus OX=10090 GN=Cyth2	Cyth2	46.585	30.456	28.2	10	11	5	1.02	0.911	1.073	0.959	0.967	0.997	1.018	1.061	1.02	0.61878
P63037	DnaJ homolog subfamily A member 1 OS=Mus musculus OX=10090 GN=Dnaja1	Dnaja1	44.868	125.76	42.6	14	36	14	1.064	1.042	1.074	1.056	0.971	0.895	0.904	0.951	0.878	0.00074353
P63038	60 kDa heat shock protein, mitochondrial OS=Mus musculus OX=10090 GN=Hspd1	Hspd1	60.955	292.01	62	32	89	32	0.998	1.012	1.025	1.059	0.998	0.965	0.969	0.987	0.957	0.02678
P63040	Complexin-1 OS=Mus musculus OX=10090 GN=Cplx1	Cplx1	15.122	24.427	56.7	5	7	3	0.682	0.852	0.998	1.254	1.064	0.966	1.012	1.184	1.116	0.36914
P63042	Stathmin-4 OS=Mus musculus OX=10090 GN=Stmn4	Stmn4	22.087	9.4439	28	6	10	5	0.949	1.122	1.018	0.926	1.051	0.966	1.002	0.984	0.997	0.9889
P63044	Vesicle-associated membrane protein 2 OS=Mus musculus OX=10090 GN=Vamp2	Vamp2	12.691	190.51	35.3	4	14	4	0.906	0.984	1.057	1.106	0.936	1.033	0.933	1.138	0.997	0.9551
P63046	Sulfotransferase 4A1 OS=Mus musculus OX=10090 GN=Sult4a1	Sult4a1	33.053	30.987	22.9	7	16	7	1.074	1.073	0.996	0.995	0.965	0.912	0.988	1.046	0.945	0.162801
P63058	Thyroid hormone receptor alpha OS=Mus musculus OX=10090 GN=Thra	Thra	55.022	6.9576	4.7	3	3	3	1.082	0.989	1.079	0.852	0.991	0.989	1.065	1.026	1.017	0.73
P63073	Eukaryotic translation initiation factor 4E OS=Mus musculus OX=10090 GN=Eif4e	Eif4e	25.053	39.326	30.4	6	11	6	0.987	0.986	1.038	1.014	1.016	0.994	1.01	0.964	0.99	0.56992
P63078	Guanine nucleotide-binding protein G(I)/G(S)/G(O) subunit gamma-8 OS=Mus musculus OX=10090 GN=Gng8	Gng8	7.8431	18.341	47.1	2	2	2
P63080	Gamma-aminobutyric acid receptor subunit beta-3 OS=Mus musculus OX=10090 GN=Gabrb3	Gabrb3	54.165	72.364	22.8	11	21	6	1.044	0.964	1.048	0.973	1.002	0.953	1	1.01	0.984	0.5713
P63082	V-type proton ATPase 16 kDa proteolipid subunit OS=Mus musculus OX=10090 GN=Atp6v0c	Atp6v0c	15.808	15.952	11.6	1	7	1	0.922	0.933	0.967	1.061	1.048	1.006	0.983	1.04	1.05	0.20466
P63084	Protein S100-A5 OS=Mus musculus OX=10090 GN=S100a5	S100a5	10.812	2.2624	8.6	1	1	1	1.244	0.682	0.954	0.456	1.198	1.056	1.17	1.214	1.39	0.168803
P63085	Mitogen-activated protein kinase 1 OS=Mus musculus OX=10090 GN=Mapk1	Mapk1	41.275	112.21	42.7	16	46	13	0.998	1.041	0.994	0.995	0.983	0.991	0.998	1.022	0.992	0.56964
P63087	Serine/threonine-protein phosphatase PP1-gamma catalytic subunit OS=Mus musculus OX=10090 GN=Ppp1cc	Ppp1cc	36.983	7.9832	37.8	11	26	2	0.992	0.989	1.01	0.927	1.035	1.002	1.026	1.031	1.045	0.069625
P63089	Pleiotrophin OS=Mus musculus OX=10090 GN=Ptn	Ptn	18.869	41.365	34.5	6	11	6	0.971	1.075	1.077	0.951	0.982	1.015	1.096	0.869	0.973	0.62938
P63094	Guanine nucleotide-binding protein G(s) subunit alpha isoforms short OS=Mus musculus OX=10090 GN=Gnas	Gnas	45.663	111.36	36.5	14	45	11	0.955	0.977	0.949	0.967	1.009	1.071	1.069	1.031	1.086	0.0020391
P63101	14-3-3 protein zeta/delta OS=Mus musculus OX=10090 GN=Ywhaz	Ywhaz	27.771	235.77	60	20	156	14	0.98	0.979	1.012	0.952	1	0.996	1.024	1.024	1.031	0.080762
P63137	Gamma-aminobutyric acid receptor subunit beta-2 OS=Mus musculus OX=10090 GN=Gabrb2	Gabrb2	59.196	39.242	22.9	10	21	4	0.923	1.08	0.986	0.936	1.087	1.022	0.924	1.004	1.029	0.58244
P63139	Nuclear transcription factor Y subunit beta OS=Mus musculus OX=10090 GN=Nfyb	Nfyb	22.787	3.4278	6.3	1	1	1
P63141	Potassium voltage-gated channel subfamily A member 2 OS=Mus musculus OX=10090 GN=Kcna2	Kcna2	56.7	1.7288	3.6	1	1	1
P63143	Voltage-gated potassium channel subunit beta-1 OS=Mus musculus OX=10090 GN=Kcnab1	Kcnab1	44.722	10.911	7.5	3	3	2	1.266	0.958	1.108	0.871	0.953	0.854	0.964	1.023	0.903	0.33654
P63154	Crooked neck-like protein 1 OS=Mus musculus OX=10090 GN=Crnkl1	Crnkl1	83.415	10.708	10.1	7	7	7
P63158	High mobility group protein B1 OS=Mus musculus OX=10090 GN=Hmgb1	Hmgb1	24.893	103.47	33.5	9	20	9	0.999	0.94	1.171	1.003	1.114	0.905	1.028	0.856	0.949	0.50086
P63168	Dynein light chain 1, cytoplasmic OS=Mus musculus OX=10090 GN=Dynll1	Dynll1	10.366	75.385	57.3	4	19	2	0.98	0.972	1.048	0.959	1.038	0.924	1.022	1.047	1.018	0.63762
P63213	Guanine nucleotide-binding protein G(I)/G(S)/G(O) subunit gamma-2 OS=Mus musculus OX=10090 GN=Gng2	Gng2	7.8501	52.228	78.9	6	17	6	0.874	0.967	1.053	1.046	0.976	1.079	1.048	1.046	1.053	0.30882
P63216	Guanine nucleotide-binding protein G(I)/G(S)/G(O) subunit gamma-3 OS=Mus musculus OX=10090 GN=Gng3	Gng3	8.3047	68.655	72	4	19	4	1.015	0.993	1.01	1.046	1.012	0.995	0.991	0.915	0.963	0.174582
P63242	Eukaryotic translation initiation factor 5A-1 OS=Mus musculus OX=10090 GN=Eif5a	Eif5a	16.832	39.447	37.7	8	23	2	0.957	1.043	0.985	1.042	0.939	1.013	0.991	1.008	0.981	0.51988
P63248	cAMP-dependent protein kinase inhibitor alpha OS=Mus musculus OX=10090 GN=Pkia	Pkia	7.9604	35.79	50	3	3	3	0.937	1.13	0.891	0.891	1.075	1.079	1.08	0.945	1.086	0.23828
P63250	G protein-activated inward rectifier potassium channel 1 OS=Mus musculus OX=10090 GN=Kcnj3	Kcnj3	56.573	4.021	2.2	1	1	1
P63260	Actin, cytoplasmic 2 OS=Mus musculus OX=10090 GN=Actg1	Actg1	41.792	323.31	69.9	27	352	11	0.982	0.959	1.011	1.01	0.991	1	1.031	1.005	1.016	0.3227
P63276	40S ribosomal protein S17 OS=Mus musculus OX=10090 GN=Rps17	Rps17	15.524	63.405	56.3	7	17	7	1.037	1.023	1.011	0.977	0.962	0.989	1.018	1.033	0.989	0.58982
P63280	SUMO-conjugating enzyme UBC9 OS=Mus musculus OX=10090 GN=Ube2i	Ube2i	18.007	25.726	34.8	7	12	7	0.94	0.919	1.076	0.984	0.977	1.034	1.046	0.99	1.033	0.41772
P63300	Selenoprotein W OS=Mus musculus OX=10090 GN=Selenow	Selenow	9.6871	13.25	13.6	3	4	3	1.073	1.126	1.053	0.88	1.1	0.934	0.928	0.915	0.938	0.40204
P63318	Protein kinase C gamma type OS=Mus musculus OX=10090 GN=Prkcg	Prkcg	78.357	164.5	35.3	22	42	19	0.916	0.97	0.987	0.884	1.061	0.997	1.068	1.082	1.12	0.010899
P63321	Ras-related protein Ral-A OS=Mus musculus OX=10090 GN=Rala	Rala	23.553	36.377	33.5	7	19	5	0.966	1.027	0.946	0.944	1.053	1.034	1.05	0.965	1.056	0.101545
P63323	40S ribosomal protein S12 OS=Mus musculus OX=10090 GN=Rps12	Rps12	14.525	39.267	42.4	6	13	6	1.09	1.05	1.038	0.969	0.986	0.954	0.959	0.997	0.939	0.060696
P63325	40S ribosomal protein S10 OS=Mus musculus OX=10090 GN=Rps10	Rps10	18.916	64.338	48.5	10	21	10	0.987	1.061	1.1	1.033	0.976	0.992	0.947	0.939	0.922	0.021418
P63328	Serine/threonine-protein phosphatase 2B catalytic subunit alpha isoform OS=Mus musculus OX=10090 GN=Ppp3ca	Ppp3ca	58.643	125.29	34.5	15	60	9	1.009	0.989	1.07	0.986	0.997	0.96	0.987	1.003	0.974	0.26244
P63330	Serine/threonine-protein phosphatase 2A catalytic subunit alpha isoform OS=Mus musculus OX=10090 GN=Ppp2ca	Ppp2ca	35.608	233.53	54.7	14	48	2	1.021	1.027	1.011	0.931	0.953	0.966	1.047	0.982	0.989	0.74728
P67778	Prohibitin OS=Mus musculus OX=10090 GN=Phb	Phb	29.82	67.605	42.3	12	24	12	0.977	0.994	1.002	1.012	1.007	0.969	0.981	1.022	0.998	0.91172
P67871	Casein kinase II subunit beta OS=Mus musculus OX=10090 GN=Csnk2b	Csnk2b	24.942	48.619	37.7	6	17	6	1.019	1.001	1.014	0.98	0.995	1.016	0.99	1.036	1.006	0.6911
P67984	60S ribosomal protein L22 OS=Mus musculus OX=10090 GN=Rpl22	Rpl22	14.759	15.444	18.8	2	5	2	1.049	1.06	1.07	0.974	0.928	1.005	1.004	0.929	0.931	0.061518
P68037	Ubiquitin-conjugating enzyme E2 L3 OS=Mus musculus OX=10090 GN=Ube2l3	Ube2l3	17.861	10.944	19.5	3	4	3	0.916	0.97	1.092	1.03	0.998	1.047	1.045	0.92	1	0.97952
P68040	Receptor of activated protein C kinase 1 OS=Mus musculus OX=10090 GN=Rack1	Rack1	35.076	188.1	70.7	18	46	18	1.053	1.038	1.009	0.996	0.982	0.982	0.984	0.962	0.955	0.0154579
P68134	Actin, alpha skeletal muscle OS=Mus musculus OX=10090 GN=Acta1	Acta1	42.051	17.183	37.4	18	257	2	1.005	0.976	0.997	1.014	1.035	1.007	0.973	1.01	1.008	0.61138
P68181	cAMP-dependent protein kinase catalytic subunit beta OS=Mus musculus OX=10090 GN=Prkacb	Prkacb	40.707	52.271	35	12	33	6	0.962	0.983	0.94	0.926	1.074	1.108	1.061	1.013	1.117	0.0028764
P68254	14-3-3 protein theta OS=Mus musculus OX=10090 GN=Ywhaq	Ywhaq	27.778	187.95	53.9	16	122	10	1.036	1.04	1.022	0.98	0.979	0.971	0.981	0.999	0.964	0.048345
P68368	Tubulin alpha-4A chain OS=Mus musculus OX=10090 GN=Tuba4a	Tuba4a	49.924	65.668	56	28	403	4	1.061	1.04	1.034	1.086	0.979	0.911	0.942	0.997	0.907	0.0053432
P68369	Tubulin alpha-1A chain OS=Mus musculus OX=10090 GN=Tuba1a	Tuba1a	50.135	323.31	58.8	33	497	0
P68372	Tubulin beta-4B chain OS=Mus musculus OX=10090 GN=Tubb4b	Tubb4b	49.83	323.31	64.3	28	441	1	1.032	1.019	0.99	0.978	1.007	0.983	0.99	1.032	0.998	0.92188
P68373	Tubulin alpha-1C chain OS=Mus musculus OX=10090 GN=Tuba1c	Tuba1c	49.909	3.005	59	33	432	1
P68404	Protein kinase C beta type OS=Mus musculus OX=10090 GN=Prkcb	Prkcb	76.75	142.45	39	24	45	15	0.995	0.961	1.045	0.976	1.022	0.975	0.97	1.055	1.011	0.69474
P68500	Contactin-5 OS=Mus musculus OX=10090 GN=Cntn5	Cntn5	120.74	34.011	6.9	7	7	5	0.887	1.062	1.107	1.05	0.955	1.055	1.034	0.875	0.954	0.50624
P68510	14-3-3 protein eta OS=Mus musculus OX=10090 GN=Ywhah	Ywhah	28.211	105.47	59.8	15	115	10	1.052	1.012	1.043	1.017	0.996	0.93	0.969	0.973	0.938	0.0094378
P69566	Ran-binding protein 9 OS=Mus musculus OX=10090 GN=Ranbp9	Ranbp9	71.011	75.462	17.2	9	11	8	1.074	1.096	1.016	1.051	0.991	0.918	0.902	0.943	0.886	0.0035406
P70121	Zinc fingers and homeoboxes protein 1 OS=Mus musculus OX=10090 GN=Zhx1	Zhx1	97.55	6.3917	1.5	1	2	1	1.032	0.907	0.95	1.023	0.992	1.035	1.055	1.021	1.049	0.194743
P70122	Ribosome maturation protein SBDS OS=Mus musculus OX=10090 GN=Sbds	Sbds	28.78	48.717	28.4	8	10	8	1.092	1.045	0.975	1.147	0.922	0.928	0.929	0.982	0.883	0.0168393
P70158	Acid sphingomyelinase-like phosphodiesterase 3a OS=Mus musculus OX=10090 GN=Smpdl3a	Smpdl3a	49.857	7.5125	7.9	3	3	3
P70168	Importin subunit beta-1 OS=Mus musculus OX=10090 GN=Kpnb1	Kpnb1	97.183	233.51	34.9	26	74	26	1.02	1.006	1.012	1.043	0.971	0.987	0.97	0.99	0.96	0.0052842
P70175	Disks large homolog 3 OS=Mus musculus OX=10090 GN=Dlg3	Dlg3	93.481	169.3	36	29	44	27	1.015	1.014	1.038	0.954	1.025	0.96	1.014	1.008	0.997	0.8911
P70182	Phosphatidylinositol 4-phosphate 5-kinase type-1 alpha OS=Mus musculus OX=10090 GN=Pip5k1a	Pip5k1a	60.484	32.752	7.7	4	4	3	0.832	1.016	0.981	0.901	1.068	1.115	1.057	1.049	1.15	0.022796
P70188	Kinesin-associated protein 3 OS=Mus musculus OX=10090 GN=Kifap3	Kifap3	91.29	71.517	16.6	13	18	12	1.025	1.037	1	0.953	0.984	1.008	1.002	0.992	0.993	0.7399
P70195	Proteasome subunit beta type-7 OS=Mus musculus OX=10090 GN=Psmb7	Psmb7	29.891	23.346	14.8	5	18	5	1.013	1	1.026	0.984	0.997	1.017	1.019	0.954	0.991	0.62178
P70196	TNF receptor-associated factor 6 OS=Mus musculus OX=10090 GN=Traf6	Traf6	60.069	4.1008	4.9	2	2	2
P70202	Latexin OS=Mus musculus OX=10090 GN=Lxn	Lxn	25.492	81.049	28.8	4	15	4	1.011	1.074	1	1.13	0.933	0.937	0.9	0.974	0.888	0.011379
P70205	Pituitary adenylate cyclase-activating polypeptide type I receptor OS=Mus musculus OX=10090 GN=Adcyap1r1	Adcyap1r1	56.639	7.0256	5.4	4	4	4	0.978	1.008	0.974	1.03	1.05	0.981	0.956	1.037	1.009	0.76824
P70206	Plexin-A1 OS=Mus musculus OX=10090 GN=Plxna1	Plxna1	211.1	278.4	27.6	47	71	36	1.008	1.005	0.972	0.97	1.007	1.051	1.013	1.02	1.034	0.053041
P70207	Plexin-A2 OS=Mus musculus OX=10090 GN=Plxna2	Plxna2	211.53	105	20.7	36	45	24	1.039	1.001	0.994	0.886	1.004	1.05	1.069	0.999	1.052	0.22628
P70208	Plexin-A3 OS=Mus musculus OX=10090 GN=Plxna3	Plxna3	207.96	81.564	14.9	26	35	18	0.956	1.068	1.001	0.955	0.987	0.993	0.988	1.007	0.999	0.99346
P70211	Netrin receptor DCC OS=Mus musculus OX=10090 GN=Dcc	Dcc	158.34	66.893	6.8	8	8	8	1.005	0.998	0.919	1.058	1.008	1.023	0.935	0.97	0.989	0.77786
P70227	Inositol 1,4,5-trisphosphate receptor type 3 OS=Mus musculus OX=10090 GN=Itpr3	Itpr3	304.27	2.7608	1.2	5	5	1	0.879	0.8	0.858	1.965	0.763	0.983	0.877	0.92	0.787	0.49786
P70232	Neural cell adhesion molecule L1-like protein OS=Mus musculus OX=10090 GN=Chl1	Chl1	135.07	323.31	32.5	33	64	33	0.982	0.999	0.977	0.943	1.04	1.019	1.032	1.01	1.051	0.0107424
P70236	Dual specificity mitogen-activated protein kinase kinase 6 OS=Mus musculus OX=10090 GN=Map2k6	Map2k6	37.432	60.789	36.5	10	13	10	1.022	1.036	1.024	1.075	0.915	0.929	0.97	1.03	0.925	0.03426
P70257	Nuclear factor 1 X-type OS=Mus musculus OX=10090 GN=Nfix	Nfix	53.394	36.337	16	7	10	5	0.928	0.943	1.014	1.113	0.957	1.022	1.074	0.931	0.996	0.96416
P70261	Paladin OS=Mus musculus OX=10090 GN=Pald1	Pald1	96.739	15.263	9.7	7	7	7
P70265	6-phosphofructo-2-kinase/fructose-2,6-bisphosphatase 2 OS=Mus musculus OX=10090 GN=Pfkfb2	Pfkfb2	59.925	19.589	15.6	8	8	7	1.027	0.964	1.005	1.04	0.995	1.018	0.958	0.964	0.975	0.2925
P70268	Serine/threonine-protein kinase N1 OS=Mus musculus OX=10090 GN=Pkn1	Pkn1	104.41	96.999	20.2	16	18	16	1.063	0.979	1.02	0.985	1.024	1.002	0.941	0.999	0.98	0.47096
P70280	Vesicle-associated membrane protein 7 OS=Mus musculus OX=10090 GN=Vamp7	Vamp7	24.967	20.748	18.6	4	6	4	1.051	1.061	1.005	1.043	0.942	0.913	1.035	0.989	0.932	0.056038
P70288	Histone deacetylase 2 OS=Mus musculus OX=10090 GN=Hdac2	Hdac2	55.302	67.231	22.5	9	13	6	1.009	0.972	1.001	0.895	1.039	1.013	1.101	0.971	1.064	0.154383
P70290	55 kDa erythrocyte membrane protein OS=Mus musculus OX=10090 GN=Mpp1	Mpp1	52.227	17.898	10.1	4	6	4	0.985	0.955	1.028	1.099	0.934	1.045	0.976	0.952	0.961	0.34934
P70295	Ancient ubiquitous protein 1 OS=Mus musculus OX=10090 GN=Aup1	Aup1	46.121	13.381	8.8	2	2	2
P70296	Phosphatidylethanolamine-binding protein 1 OS=Mus musculus OX=10090 GN=Pebp1	Pebp1	20.83	161.51	80.7	13	39	13	0.979	0.98	0.986	1.015	1.061	0.983	1.024	0.995	1.026	0.23044
P70297	Signal transducing adapter molecule 1 OS=Mus musculus OX=10090 GN=Stam	Stam	59.771	64.354	19	9	18	9	0.988	1.013	1.008	1.044	0.998	0.977	0.999	1.032	0.988	0.49474
P70302	Stromal interaction molecule 1 OS=Mus musculus OX=10090 GN=Stim1	Stim1	77.566	14.891	7.2	5	6	5	1.111	1.008	1.022	1.103	0.851	1.027	0.941	0.958	0.89	0.043741
P70303	CTP synthase 2 OS=Mus musculus OX=10090 GN=Ctps2	Ctps2	65.514	3.0809	7.2	4	4	2
P70314	Pituitary homeobox 1 OS=Mus musculus OX=10090 GN=Pitx1	Pitx1	34.075	-2	2.2	1	2	1	1.109	1.023	1.049	1.102	0.936	0.813	1.017	0.963	0.871	0.033699
P70318	Nucleolysin TIAR OS=Mus musculus OX=10090 GN=Tial1	Tial1	43.388	38.013	28.3	9	12	6	0.96	0.908	1.084	1.016	0.951	1.027	1.009	1.024	1.011	0.7766
P70333	Heterogeneous nuclear ribonucleoprotein H2 OS=Mus musculus OX=10090 GN=Hnrnph2	Hnrnph2	49.279	81.656	39.4	14	46	6	0.979	0.932	0.997	0.943	1.042	1.029	1.063	1.008	1.076	0.00916
P70335	Rho-associated protein kinase 1 OS=Mus musculus OX=10090 GN=Rock1	Rock1	158.17	5.2437	7.4	11	13	5	0.897	1.074	1.009	0.782	1.11	1.109	1.134	0.905	1.132	0.1979
P70336	Rho-associated protein kinase 2 OS=Mus musculus OX=10090 GN=Rock2	Rock2	160.58	170.85	26.4	36	48	30	1.036	1.022	1.016	1.023	1.013	0.942	0.953	0.999	0.954	0.077639
P70345	Bcl-2-like protein 2 OS=Mus musculus OX=10090 GN=Bcl2l2	Bcl2l2	20.79	2.7474	5.2	1	1	1
P70349	Histidine triad nucleotide-binding protein 1 OS=Mus musculus OX=10090 GN=Hint1	Hint1	13.777	56.986	39.7	5	7	5	0.885	0.969	0.95	1.024	1.034	1.059	1.016	1.031	1.082	0.044064
P70353	Nuclear transcription factor Y subunit gamma OS=Mus musculus OX=10090 GN=Nfyc	Nfyc	37.253	3.2237	2.7	1	1	1	0.942	1.027	1.121	1.129	0.958	0.944	0.95	0.944	0.9	0.0952
P70362	Ubiquitin recognition factor in ER-associated degradation protein 1 OS=Mus musculus OX=10090 GN=Ufd1	Ufd1	34.481	47.819	34.9	10	16	10	0.972	0.936	1.013	0.955	1.023	1.047	1.058	1.005	1.066	0.0196238
P70365	Nuclear receptor coactivator 1 OS=Mus musculus OX=10090 GN=Ncoa1	Ncoa1	157.01	11.278	3.7	5	5	5	1.052	0.964	1.018	1.097	0.933	1.052	1.033	0.885	0.945	0.28386
P70372	ELAV-like protein 1 OS=Mus musculus OX=10090 GN=Elavl1	Elavl1	36.169	67.302	37.1	11	21	11	0.978	0.965	0.979	1.008	1.013	1.051	1.051	0.98	1.042	0.07726
P70377	Fibroblast growth factor 13 OS=Mus musculus OX=10090 GN=Fgf13	Fgf13	27.587	3.4117	4.1	1	2	1	0.966	1.063	0.894	1.06	1.008	1.014	1.094	0.932	1.016	0.75682
P70388	DNA repair protein RAD50 OS=Mus musculus OX=10090 GN=Rad50	Rad50	153.49	2.2564	0.6	1	1	1
P70392	Ras-specific guanine nucleotide-releasing factor 2 OS=Mus musculus OX=10090 GN=Rasgrf2	Rasgrf2	135.67	32.251	9.8	12	13	10	1.051	0.958	1.01	0.915	1.02	1.028	0.974	1.034	1.031	0.37748
P70398	Probable ubiquitin carboxyl-terminal hydrolase FAF-X OS=Mus musculus OX=10090 GN=Usp9x	Usp9x	290.71	323.31	24.4	59	94	59	1.002	1.015	0.978	0.959	1.006	1.021	1.026	1.021	1.03	0.064738
P70399	TP53-binding protein 1 OS=Mus musculus OX=10090 GN=Tp53bp1	Tp53bp1	212.73	323.31	24.3	34	53	34	1.017	0.993	0.993	0.973	0.989	1.035	1.052	0.964	1.016	0.50948
P70403	Protein CASP OS=Mus musculus OX=10090 GN=Cux1	Cux1	77.268	28.799	10.3	7	8	7	0.993	1.023	0.983	0.979	0.967	1.032	1.025	0.975	1.005	0.8062
P70404	Isocitrate dehydrogenase [NAD] subunit gamma 1, mitochondrial OS=Mus musculus OX=10090 GN=Idh3g	Idh3g	42.785	78.821	38.4	12	26	12	0.996	0.982	0.98	1.027	0.992	0.988	1.024	1.05	1.017	0.37942
P70407	Cadherin-9 OS=Mus musculus OX=10090 GN=Cdh9	Cdh9	88.3	4.0084	3.8	3	4	1	0.906	1.037	0.834	0.985	0.988	1.019	1.175	1.085	1.134	0.083301
P70408	Cadherin-10 OS=Mus musculus OX=10090 GN=Cdh10	Cdh10	88.311	39.355	13.5	9	11	7	0.923	0.956	0.992	1.01	1.035	1.05	1.03	0.987	1.057	0.059696
P70414	Sodium/calcium exchanger 1 OS=Mus musculus OX=10090 GN=Slc8a1	Slc8a1	108.03	60.045	11.1	10	26	10	0.947	0.999	0.987	0.968	1.004	1.031	1.036	1.027	1.05	0.0109556
P70423	Cationic amino acid transporter 3 OS=Mus musculus OX=10090 GN=Slc7a3	Slc7a3	67.459	10.01	2.1	1	1	1	1.059	1.224	1.11	1.025	0.884	0.796	0.916	1.003	0.815	0.0153177
P70425	GTP-binding protein Rit2 OS=Mus musculus OX=10090 GN=Rit2	Rit2	24.802	7.6802	16.6	4	4	4	0.976	1.005	0.947	1.095	1.027	0.975	0.998	0.995	0.993	0.86944
P70429	Ena/VASP-like protein OS=Mus musculus OX=10090 GN=Evl	Evl	44.337	145.15	32.9	13	26	13	0.952	1.009	0.961	0.97	1.069	1.024	1.05	0.965	1.055	0.082676
P70441	Na(+)/H(+) exchange regulatory cofactor NHE-RF1 OS=Mus musculus OX=10090 GN=Slc9a3r1	Slc9a3r1	38.6	67.08	44.5	16	24	16	0.937	0.979	0.969	1.044	1.023	0.994	0.997	1.069	1.039	0.21784
P70451	Tyrosine-protein kinase Fer OS=Mus musculus OX=10090 GN=Fer	Fer	94.578	55.075	16.9	12	13	12	1.012	1.048	1.017	1	0.981	1.009	1.039	0.987	0.985	0.38988
P70452	Syntaxin-4 OS=Mus musculus OX=10090 GN=Stx4	Stx4	34.165	7.4346	9.1	3	3	3	0.932	0.805	1.063	1.079	1.114	1.008	0.946	1.051	1.062	0.42718
P70453	High affinity cAMP-specific 3',5'-cyclic phosphodiesterase 7A OS=Mus musculus OX=10090 GN=Pde7a	Pde7a	52.485	4.6028	2.9	1	1	1
P70460	Vasodilator-stimulated phosphoprotein OS=Mus musculus OX=10090 GN=Vasp	Vasp	39.666	40.776	23.2	8	10	8	0.94	0.971	1.009	1.003	1.025	0.972	1.016	1.042	1.034	0.184098
P70662	LIM domain-binding protein 1 OS=Mus musculus OX=10090 GN=Ldb1	Ldb1	46.502	11.058	7.8	3	3	3	0.874	0.966	1.196	0.957	0.949	1.017	0.929	1.116	1.005	0.91498
P70663	SPARC-like protein 1 OS=Mus musculus OX=10090 GN=Sparcl1	Sparcl1	72.286	119.25	32.6	16	27	16	0.983	0.939	0.979	1.015	1.104	0.953	1.028	0.986	1.04	0.32888
P70665	Sialate O-acetylesterase OS=Mus musculus OX=10090 GN=Siae	Siae	60.775	9.0269	2.2	1	1	1
P70670	Nascent polypeptide-associated complex subunit alpha, muscle-specific form OS=Mus musculus OX=10090 GN=Naca	Naca	220.5	58.305	3.3	6	17	6	1.08	1.019	1.009	1.003	0.958	0.986	0.964	0.952	0.939	0.0151826
P70671	Interferon regulatory factor 3 OS=Mus musculus OX=10090 GN=Irf3	Irf3	46.852	3.5585	4.3	2	2	2
P70677	Caspase-3 OS=Mus musculus OX=10090 GN=Casp3	Casp3	31.474	41.831	21.7	6	17	6	0.973	1.031	0.896	0.893	1.015	1.141	1.09	1.035	1.129	0.031462
P70697	Uroporphyrinogen decarboxylase OS=Mus musculus OX=10090 GN=Urod	Urod	40.691	52.803	22.3	6	7	6	1.015	1.007	0.895	0.977	0.998	1.113	0.973	0.992	1.047	0.31882
P70698	CTP synthase 1 OS=Mus musculus OX=10090 GN=Ctps1	Ctps1	66.682	63.464	23.4	13	20	11	1.099	1.062	1.051	1.032	0.925	0.954	0.909	0.982	0.888	0.00152059
P70699	Lysosomal alpha-glucosidase OS=Mus musculus OX=10090 GN=Gaa	Gaa	106.25	50.585	12.7	9	13	9	0.988	1	0.947	1.011	1.019	1.015	0.942	1.071	1.026	0.44584
P70704	Phospholipid-transporting ATPase IA OS=Mus musculus OX=10090 GN=Atp8a1	Atp8a1	131.41	116.48	22.1	24	42	22	1.022	0.986	0.984	0.996	0.986	0.974	1.008	1.036	1.004	0.81946
P80313	T-complex protein 1 subunit eta OS=Mus musculus OX=10090 GN=Cct7	Cct7	59.652	125.05	46.7	25	59	25	0.993	0.997	1.008	0.994	0.984	1.02	1.016	1.001	1.007	0.44998
P80314	T-complex protein 1 subunit beta OS=Mus musculus OX=10090 GN=Cct2	Cct2	57.477	239.22	47.3	24	71	24	1.012	0.986	1.005	0.994	0.985	1.012	1.009	0.996	1.001	0.88856
P80315	T-complex protein 1 subunit delta OS=Mus musculus OX=10090 GN=Cct4	Cct4	58.066	315.63	55.1	30	74	30	1.013	1.019	0.992	0.989	1.012	0.997	1.03	0.974	1	0.99308
P80316	T-complex protein 1 subunit epsilon OS=Mus musculus OX=10090 GN=Cct5	Cct5	59.623	132.62	47.3	25	75	25	1.017	1.008	0.99	0.965	0.996	1.031	1.023	0.99	1.015	0.36286
P80317	T-complex protein 1 subunit zeta OS=Mus musculus OX=10090 GN=Cct6a	Cct6a	58.004	86.575	35.2	20	48	20	0.994	0.982	1.001	1.003	0.974	1.004	1.009	0.983	0.997	0.79824
P80318	T-complex protein 1 subunit gamma OS=Mus musculus OX=10090 GN=Cct3	Cct3	60.629	276.54	60.4	34	112	34	1.012	0.975	1.004	0.993	0.999	1.022	1.018	0.99	1.011	0.3491
P80560	Receptor-type tyrosine-protein phosphatase N2 OS=Mus musculus OX=10090 GN=Ptprn2	Ptprn2	111.5	33.138	9.3	8	9	8	1	1.124	0.975	0.961	1.02	1.043	0.996	0.961	0.99	0.839
P81117	Nucleobindin-2 OS=Mus musculus OX=10090 GN=Nucb2	Nucb2	50.304	11.618	15	5	5	5	1.001	0.958	1.034	1.02	0.92	1.017	1.012	1.052	0.997	0.91254
P81122	Insulin receptor substrate 2 OS=Mus musculus OX=10090 GN=Irs2	Irs2	136.76	23.699	2.6	2	2	2
P82343	N-acylglucosamine 2-epimerase OS=Mus musculus OX=10090 GN=Renbp	Renbp	49.771	2.3549	1.6	1	1	1	1.181	0.894	0.883	1.202	0.97	0.968	0.931	0.985	0.926	0.49794
P83093	Stromal interaction molecule 2 OS=Mus musculus OX=10090 GN=Stim2	Stim2	83.924	21.827	8.8	5	6	5	0.947	1.043	0.989	1.044	0.995	0.96	1	0.911	0.961	0.2592
P83510	Traf2 and NCK-interacting protein kinase OS=Mus musculus OX=10090 GN=Tnik	Tnik	150.37	180.49	26.3	35	49	27	0.99	0.996	0.939	0.892	1.091	1.05	1.012	0.981	1.083	0.05992
P83741	Serine/threonine-protein kinase WNK1 OS=Mus musculus OX=10090 GN=Wnk1	Wnk1	250.93	30.151	5.3	12	15	9	1.076	0.947	0.964	1.059	0.996	0.987	1.001	0.987	0.981	0.63466
P83877	Thioredoxin-like protein 4A OS=Mus musculus OX=10090 GN=Txnl4a	Txnl4a	16.786	17.079	29.6	4	5	4	0.96	1.002	1	1.064	1.026	0.955	0.996	1.013	0.991	0.75304
P83882	60S ribosomal protein L36a OS=Mus musculus OX=10090 GN=Rpl36a	Rpl36a	12.441	9.6571	26.4	5	7	5	1.101	1.06	1.071	0.977	0.875	0.945	1.037	0.908	0.895	0.04528
P83887	Tubulin gamma-1 chain OS=Mus musculus OX=10090 GN=Tubg1	Tubg1	51.1	32.795	16.6	7	8	1
P83917	Chromobox protein homolog 1 OS=Mus musculus OX=10090 GN=Cbx1	Cbx1	21.418	22.919	28.1	4	9	3	0.806	1.001	1.102	1.094	1.045	0.999	0.94	1.026	1.002	0.91388
P83940	Elongin-C OS=Mus musculus OX=10090 GN=Eloc	Eloc	12.473	62.038	65.2	6	17	6	1.052	1	1.019	0.992	0.978	0.962	0.978	1.035	0.973	0.23032
P84075	Neuron-specific calcium-binding protein hippocalcin OS=Mus musculus OX=10090 GN=Hpca	Hpca	22.427	96.767	71.5	14	41	5	1.018	1.059	0.959	0.94	0.989	0.941	1.01	1.051	1.004	0.91248
P84078	ADP-ribosylation factor 1 OS=Mus musculus OX=10090 GN=Arf1	Arf1	20.697	45.368	47	8	61	0
P84084	ADP-ribosylation factor 5 OS=Mus musculus OX=10090 GN=Arf5	Arf5	20.529	116.21	52.8	9	46	4	0.992	0.974	0.991	0.981	1.02	1.014	0.972	1.035	1.026	0.121136
P84086	Complexin-2 OS=Mus musculus OX=10090 GN=Cplx2	Cplx2	15.394	60.404	53.7	7	10	5	0.791	0.873	1.004	0.931	1.177	0.991	1.059	1.053	1.189	0.029922
P84089	Enhancer of rudimentary homolog OS=Mus musculus OX=10090 GN=Erh	Erh	12.259	28.99	34.6	4	9	4	0.824	0.956	1.129	1.066	0.963	1.076	1.033	1.016	1.028	0.65494
P84091	AP-2 complex subunit mu OS=Mus musculus OX=10090 GN=Ap2m1	Ap2m1	49.654	169.21	59.8	25	64	25	1.017	0.986	1.021	0.967	1.004	0.981	1.021	1.025	1.01	0.56064
P84096	Rho-related GTP-binding protein RhoG OS=Mus musculus OX=10090 GN=Rhog	Rhog	21.308	40.322	42.4	7	10	6	0.986	1.025	0.982	1.152	1.032	0.927	0.964	0.987	0.943	0.23814
P84099	60S ribosomal protein L19 OS=Mus musculus OX=10090 GN=Rpl19	Rpl19	23.466	35.361	26.5	6	8	6	0.967	1.043	1.062	1.039	0.847	0.964	0.967	0.933	0.903	0.032363
P84104	Serine/arginine-rich splicing factor 3 OS=Mus musculus OX=10090 GN=Srsf3	Srsf3	19.329	31.359	39	7	19	6	0.989	1.007	0.993	0.939	1.004	1.044	1.056	0.959	1.034	0.25608
P84228	Histone H3.2 OS=Mus musculus OX=10090 GN=Hist1h3b	Hist1h3b	15.388	7.8892	25	5	7	1	0.958	0.928	0.688	1.161	1.224	1.177	1.141	0.758	1.151	0.40056
P84244	Histone H3.3 OS=Mus musculus OX=10090 GN=H3f3a	H3f3a	15.328	-2	25	5	6	1
P84309	Adenylate cyclase type 5 OS=Mus musculus OX=10090 GN=Adcy5	Adcy5	139.12	142.16	11.7	11	13	11	0.948	1.005	0.968	1.023	1.017	0.991	1.027	0.997	1.022	0.28826
P84751	Ig heavy chain Mem5 (Fragment) OS=Mus musculus OX=10090	---	25.349	2.9243	11.8	1	1	1	2.029	0.473	1.177	1.162	0.531	0.591			0.464	0.22666
P85094	Isochorismatase domain-containing protein 2A OS=Mus musculus OX=10090 GN=Isoc2a	Isoc2a	22.417	25.401	17	3	4	3	1.141	0.919	0.942	1.087	0.911	0.99	1.007	1.001	0.956	0.5002
P97287	Induced myeloid leukemia cell differentiation protein Mcl-1 homolog OS=Mus musculus OX=10090 GN=Mcl1	Mcl1	35.217	7.0174	8.5	2	2	2
P97290	Plasma protease C1 inhibitor OS=Mus musculus OX=10090 GN=Serping1	Serping1	55.584	3.5229	2.2	1	1	1
P97291	Cadherin-8 OS=Mus musculus OX=10090 GN=Cdh8	Cdh8	88.214	18.394	8.9	7	7	7	1.007	0.988	1.008	1.018	0.987	0.987	1.014	1.013	0.995	0.62982
P97298	Pigment epithelium-derived factor OS=Mus musculus OX=10090 GN=Serpinf1	Serpinf1	46.233	27.647	16.1	5	8	5	1.056	1.048	0.898	0.821	1.037	1.056	0.993	1.105	1.096	0.188876
P97300	Neuroplastin OS=Mus musculus OX=10090 GN=Nptn	Nptn	44.373	105.68	38.5	16	46	16	1	0.957	1.02	0.98	1.046	0.903	1.027	1.016	1.009	0.843
P97306	SH3 and cysteine-rich domain-containing protein OS=Mus musculus OX=10090 GN=Stac	Stac	44.319	1.5453	2.5	1	1	1
P97310	DNA replication licensing factor MCM2 OS=Mus musculus OX=10090 GN=Mcm2	Mcm2	102.08	11.708	1.3	1	2	1
P97311	DNA replication licensing factor MCM6 OS=Mus musculus OX=10090 GN=Mcm6	Mcm6	92.866	5.9143	3.8	3	3	3	1.047	0.982	1.1	1.393	0.815	0.916	0.818	0.949	0.774	0.026636
P97313	DNA-dependent protein kinase catalytic subunit OS=Mus musculus OX=10090 GN=Prkdc	Prkdc	471.47	1.8114	0.2	1	1	1
P97314	Cysteine and glycine-rich protein 2 OS=Mus musculus OX=10090 GN=Csrp2	Csrp2	20.926	5.8734	5.2	1	1	1	1.137	1.158	1.002	0.969	0.894	0.978	0.968	0.919	0.881	0.045862
P97315	Cysteine and glycine-rich protein 1 OS=Mus musculus OX=10090 GN=Csrp1	Csrp1	20.583	170.95	56	11	18	11	0.907	0.912	0.887	0.981	1.08	1.059	1.077	1.089	1.168	0.00046259
P97318	Disabled homolog 1 OS=Mus musculus OX=10090 GN=Dab1	Dab1	63.577	6.1629	3.1	2	2	2	1.055	1.128	0.996	0.788	0.961	0.981	1.083	1.027	1.021	0.73754
P97326	Cadherin-6 OS=Mus musculus OX=10090 GN=Cdh6	Cdh6	88.354	37.451	12.7	9	10	8	1.028	1.061	0.976	1.025	0.944	1.012	0.928	0.891	0.923	0.043436
P97333	Neuropilin-1 OS=Mus musculus OX=10090 GN=Nrp1	Nrp1	103	47.379	11.4	9	9	9	1.085	0.976	0.882	0.982	0.988	1.047	0.991	1.008	1.028	0.52658
P97346	Nucleoredoxin OS=Mus musculus OX=10090 GN=Nxn	Nxn	48.343	82.862	13.1	3	3	3	1.043	1.024	1.007	1.045	0.75	0.907	1.06	1.039	0.912	0.2955
P97351	40S ribosomal protein S3a OS=Mus musculus OX=10090 GN=Rps3a	Rps3a	29.885	69.323	50.4	16	37	16	1.072	1.079	1.078	1	0.93	0.963	0.967	0.932	0.897	0.0021431
P97352	Protein S100-A13 OS=Mus musculus OX=10090 GN=S100a13	S100a13	11.158	5.7493	19.4	2	2	2
P97355	Spermine synthase OS=Mus musculus OX=10090 GN=Sms	Sms	41.313	31.979	26.5	10	13	10	0.971	1.008	0.946	0.91	1.002	1.088	1.016	0.99	1.068	0.071718
P97363	Serine palmitoyltransferase 2 OS=Mus musculus OX=10090 GN=Sptlc2	Sptlc2	62.981	20.874	15.9	8	9	8	1.033	1.017	1.051	1.095	0.922	1.026	1.008	1.015	0.946	0.106539
P97366	Ecotropic viral integration site 5 protein OS=Mus musculus OX=10090 GN=Evi5	Evi5	92.942	2.411	1.7	2	2	2	1.003	1.142	0.862	1.06	1.008	1.068	0.917	0.969	0.974	0.75106
P97370	Sodium/potassium-transporting ATPase subunit beta-3 OS=Mus musculus OX=10090 GN=Atp1b3	Atp1b3	31.775	52.051	47.5	11	22	11	1.035	1.006	0.945	1.074	1.021	0.973	0.977	1.01	0.981	0.54856
P97371	Proteasome activator complex subunit 1 OS=Mus musculus OX=10090 GN=Psme1	Psme1	28.673	38.026	34.1	9	11	9	0.858	1.034	0.891	0.868	1.161	1.002	1.076	1.093	1.187	0.0170832
P97372	Proteasome activator complex subunit 2 OS=Mus musculus OX=10090 GN=Psme2	Psme2	27.057	53.287	29.7	9	17	9	0.942	0.958	0.915	0.957	1.027	1.005	1.088	1.112	1.122	0.004636
P97376	Protein FRG1 OS=Mus musculus OX=10090 GN=Frg1	Frg1	29.127	1.6245	3.1	1	2	1	1.062	0.973	1.023	0.991	1.033	0.956	1.051	0.922	0.979	0.55946
P97379	Ras GTPase-activating protein-binding protein 2 OS=Mus musculus OX=10090 GN=G3bp2	G3bp2	54.087	78.249	32.6	15	41	13	1.04	1.023	1.015	0.97	0.994	0.983	0.972	0.974	0.969	0.096101
P97384	Annexin A11 OS=Mus musculus OX=10090 GN=Anxa11	Anxa11	54.079	31.375	14.9	6	8	6	1.03	0.921	0.991	1.01	0.989	1.01	1.107	1.089	1.061	0.158637
P97386	DNA ligase 3 OS=Mus musculus OX=10090 GN=Lig3	Lig3	113.07	20.28	7	6	8	6	1.065	0.934	1.002	0.844	1.021	1.033	1.015	0.993	1.056	0.33144
P97390	Vacuolar protein sorting-associated protein 45 OS=Mus musculus OX=10090 GN=Vps45	Vps45	65.052	50.652	22.3	13	18	13	0.981	1.01	0.989	0.981	0.997	1.019	1.001	1.011	1.017	0.094164
P97393	Rho GTPase-activating protein 5 OS=Mus musculus OX=10090 GN=Arhgap5	Arhgap5	172.11	78.623	10.2	14	14	14	1.075	1.031	1.016	1.044	0.958	0.982	0.909	1.017	0.928	0.029319
P97411	Islet cell autoantigen 1 OS=Mus musculus OX=10090 GN=Ica1	Ica1	54.324	72.576	25.7	12	15	11	1.01	1.03	0.986	1.025	0.954	1.013	0.941	1.03	0.972	0.27808
P97427	Dihydropyrimidinase-related protein 1 OS=Mus musculus OX=10090 GN=Crmp1	Crmp1	62.167	323.31	58.9	28	141	23	0.967	0.95	0.996	0.879	1.011	1.054	1.066	1.014	1.093	0.023843
P97429	Annexin A4 OS=Mus musculus OX=10090 GN=Anxa4	Anxa4	35.915	17.228	15.7	5	5	4	1.139	0.977	0.976	1.042	0.814	0.958	0.94	1.167	0.938	0.42902
P97433	Rho guanine nucleotide exchange factor 28 OS=Mus musculus OX=10090 GN=Arhgef28	Arhgef28	190.32	8.7159	1.4	2	3	2
P97434	Myosin phosphatase Rho-interacting protein OS=Mus musculus OX=10090 GN=Mprip	Mprip	116.41	85.227	19.3	15	15	15	0.919	0.971	0.935	1.022	1.006	1.076	1.016	1.051	1.079	0.03562
P97441	Zinc transporter 3 OS=Mus musculus OX=10090 GN=Slc30a3	Slc30a3	41.824	9.121	11.6	3	3	3	1.006	0.99	0.981	1.167	1.012	0.93	0.94	0.991	0.935	0.20052
P97445	Voltage-dependent P/Q-type calcium channel subunit alpha-1A OS=Mus musculus OX=10090 GN=Cacna1a	Cacna1a	267.64	30.951	5.1	11	12	10	0.962	1.029	0.984	1.067	1.012	1.017	1.008	1.005	1	0.97494
P97447	Four and a half LIM domains protein 1 OS=Mus musculus OX=10090 GN=Fhl1	Fhl1	31.888	50.871	41.8	11	18	11	1.055	1.025	0.978	0.882	0.983	1.089	1.02	0.98	1.034	0.48666
P97449	Aminopeptidase N OS=Mus musculus OX=10090 GN=Anpep	Anpep	109.65	56.636	14	12	16	12	1.04	0.966	0.926	0.908	1.12	1.041	0.974	1.038	1.087	0.0912
P97450	ATP synthase-coupling factor 6, mitochondrial OS=Mus musculus OX=10090 GN=Atp5j	Atp5j	12.496	14.021	36.1	4	5	4	0.965	0.99	0.87	1.04	1.004	1.046	1.071	1.038	1.076	0.108878
P97452	Ribosome biogenesis protein BOP1 OS=Mus musculus OX=10090 GN=Bop1	Bop1	82.545	11.327	2.7	2	3	2	1.06	1.041	1	1.096	0.902	0.934	1.108	0.886	0.913	0.132757
P97461	40S ribosomal protein S5 OS=Mus musculus OX=10090 GN=Rps5	Rps5	22.889	21.77	32.4	8	18	8	1.072	1.072	0.948	0.913	1.012	0.991	0.999	0.942	0.985	0.77796
P97467	Peptidyl-glycine alpha-amidating monooxygenase OS=Mus musculus OX=10090 GN=Pam	Pam	108.96	11.855	5.9	5	5	5
P97470	Serine/threonine-protein phosphatase 4 catalytic subunit OS=Mus musculus OX=10090 GN=Ppp4c	Ppp4c	35.08	15.62	15.6	4	8	3	0.994	1.004	1.027	1.007	1.08	1.096	0.973	0.985	1.025	0.50716
P97471	Mothers against decapentaplegic homolog 4 OS=Mus musculus OX=10090 GN=Smad4	Smad4	60.341	5.517	6.2	4	4	4	0.942	0.994	1.048	1.037	0.994	1.001	1.046	0.956	0.994	0.85958
P97473	RISC-loading complex subunit TARBP2 OS=Mus musculus OX=10090 GN=Tarbp2	Tarbp2	38.842	6.3752	5.8	2	2	2	0.983	1.053	0.963	0.988	1.049	1.017	0.973	0.992	1.011	0.6743
P97478	5-demethoxyubiquinone hydroxylase, mitochondrial OS=Mus musculus OX=10090 GN=Coq7	Coq7	24.041	3.11	9.2	2	2	2	0.973	1.089	1.007	0.979	0.826	1.124	1.016	1.017	0.984	0.7704
P97480	Eyes absent homolog 3 OS=Mus musculus OX=10090 GN=Eya3	Eya3	55.973	7.9182	2.7	1	1	1
P97490	Adenylate cyclase type 8 OS=Mus musculus OX=10090 GN=Adcy8	Adcy8	140.09	5.3854	1.4	2	2	2	0.993	0.995	0.985	1.127	1.029	0.931	0.985	0.972	0.955	0.28684
P97493	Thioredoxin, mitochondrial OS=Mus musculus OX=10090 GN=Txn2	Txn2	18.255	1.4144	6	1	1	1
P97494	Glutamate--cysteine ligase catalytic subunit OS=Mus musculus OX=10090 GN=Gclc	Gclc	72.571	42.749	16.8	9	12	9	1.064	1.063	1.011	0.997	0.976	0.932	0.938	0.954	0.919	0.0053194
P97496	SWI/SNF complex subunit SMARCC1 OS=Mus musculus OX=10090 GN=Smarcc1	Smarcc1	122.89	11.492	12.8	12	21	4	0.987	1.054	1.194	1.165	1.001	0.93	0.843	0.839	0.821	0.0183812
P97499	Telomerase protein component 1 OS=Mus musculus OX=10090 GN=Tep1	Tep1	291.46	-2	0.4	1	1	1	1.048	1.086	1.026	0.926	1.056	0.891	0.971	1.005	0.96	0.44044
P97500	Myelin transcription factor 1-like protein OS=Mus musculus OX=10090 GN=Myt1l	Myt1l	132.94	3.0873	2.6	3	3	3
P97742	Carnitine O-palmitoyltransferase 1, liver isoform OS=Mus musculus OX=10090 GN=Cpt1a	Cpt1a	88.25	63.32	22	16	19	16	0.977	0.992	1.007	1.001	1.04	1.012	0.986	0.994	1.014	0.35372
P97760	DNA-directed RNA polymerase II subunit RPB3 OS=Mus musculus OX=10090 GN=Polr2c	Polr2c	31.443	12.836	18.2	4	5	4
P97765	WW domain-binding protein 2 OS=Mus musculus OX=10090 GN=Wbp2	Wbp2	28.032	26.087	19.2	5	8	5	0.986	0.963	0.993	0.98	1.012	1	1.051	0.958	1.025	0.27122
P97770	THUMP domain-containing protein 3 OS=Mus musculus OX=10090 GN=Thumpd3	Thumpd3	56.431	26.446	16.2	8	10	8	1.005	0.976	0.998	0.933	0.974	1.042	0.95	0.997	1.013	0.6382
P97772	Metabotropic glutamate receptor 1 OS=Mus musculus OX=10090 GN=Grm1	Grm1	133.21	38.897	8.6	11	14	9	0.98	1.008	0.978	1.082	0.955	0.987	1.024	0.977	0.974	0.38872
P97785	GDNF family receptor alpha-1 OS=Mus musculus OX=10090 GN=Gfra1	Gfra1	51.752	29.71	12.4	5	6	5	0.837	1.027	0.858	1.091	1.05	1.153	0.932	0.981	1.079	0.35804
P97789	5'-3' exoribonuclease 1 OS=Mus musculus OX=10090 GN=Xrn1	Xrn1	194.31	20.054	3.7	6	7	6	1.021	1.02	1.044	0.86	1.03	0.998	1.065	0.966	1.029	0.55792
P97792	Coxsackievirus and adenovirus receptor homolog OS=Mus musculus OX=10090 GN=Cxadr	Cxadr	39.947	94.591	40.3	15	46	15	0.964	0.941	0.973	0.889	1.031	1.044	1.07	1.016	1.105	0.0049038
P97793	ALK tyrosine kinase receptor OS=Mus musculus OX=10090 GN=Alk	Alk	174.95	4.9547	2	3	3	3
P97797	Tyrosine-protein phosphatase non-receptor type substrate 1 OS=Mus musculus OX=10090 GN=Sirpa	Sirpa	56.424	123.82	20.7	9	15	9	0.978	1.007	1.04	0.932	1.023	0.959	1.022	1.077	1.031	0.38978
P97798	Neogenin OS=Mus musculus OX=10090 GN=Neo1	Neo1	163.16	133.95	18.2	21	29	21	1.019	0.987	0.972	0.971	0.989	1.042	1.045	1.02	1.037	0.075163
P97807	Fumarate hydratase, mitochondrial OS=Mus musculus OX=10090 GN=Fh	Fh	54.356	115.28	29.2	16	37	16	0.979	0.991	0.984	1.067	0.985	1	0.973	0.988	0.981	0.41814
P97813	Phospholipase D2 OS=Mus musculus OX=10090 GN=Pld2	Pld2	106.17	2.8774	1	1	1	1	0.823	0.874	1.154	1.117	0.859	1.096	1.06	1.036	1.021	0.79722
P97819	85/88 kDa calcium-independent phospholipase A2 OS=Mus musculus OX=10090 GN=Pla2g6	Pla2g6	89.559	6.1264	6.1	4	4	4	1.192	1.085	1.234	1.043	0.753	0.99	0.993	0.726	0.76	0.023497
P97820	Mitogen-activated protein kinase kinase kinase kinase 4 OS=Mus musculus OX=10090 GN=Map4k4	Map4k4	140.6	151.76	20.7	30	34	22	0.93	1.038	1.011	0.999	1.041	1.035	1.029	0.948	1.019	0.5814
P97821	Dipeptidyl peptidase 1 OS=Mus musculus OX=10090 GN=Ctsc	Ctsc	52.376	12.524	11	4	6	4	0.875	0.879	1.085	1.001	0.864	1.132	1.035	1.12	1.081	0.38534
P97822	Acidic leucine-rich nuclear phosphoprotein 32 family member E OS=Mus musculus OX=10090 GN=Anp32e	Anp32e	29.622	15.29	5.4	2	3	2	0.872	0.997	1.047	0.952	1.085	1.072	1.015	0.974	1.072	0.177321
P97823	Acyl-protein thioesterase 1 OS=Mus musculus OX=10090 GN=Lypla1	Lypla1	24.687	21.844	10.4	2	3	2	1.002	1.076	1.041	1.193	0.928	0.954	0.941	0.891	0.861	0.010521
P97825	Jupiter microtubule associated homolog 1 OS=Mus musculus OX=10090 GN=JPT1	JPT1	16.08	44.413	25.3	2	3	2	1.208	1.144	0.971	0.944	1.005	0.994	0.84	0.91	0.879	0.136838
P97855	Ras GTPase-activating protein-binding protein 1 OS=Mus musculus OX=10090 GN=G3bp1	G3bp1	51.828	72.9	37.2	14	20	12	0.964	0.975	1.082	1.012	0.978	1.001	1.07	0.936	0.988	0.76158
P97864	Caspase-7 OS=Mus musculus OX=10090 GN=Casp7	Casp7	34.06	8.0436	14.2	5	5	5	0.863	0.921	0.973	0.786	1.121	1.296	1.106	0.951	1.263	0.025637
P97868	E3 ubiquitin-protein ligase RBBP6 OS=Mus musculus OX=10090 GN=Rbbp6	Rbbp6	199.59	29.246	3	5	5	5	0.945	1.043	0.938	0.998	0.957	1.098	1.026	1.021	1.045	0.28448
P97927	Laminin subunit alpha-4 OS=Mus musculus OX=10090 GN=Lama4	Lama4	201.82	29.542	5.2	8	9	8	1.151	1.017	1.136	0.918	0.898	0.952	0.872	1.015	0.885	0.1053
P97930	Thymidylate kinase OS=Mus musculus OX=10090 GN=Dtymk	Dtymk	23.914	19.214	37.7	9	10	9	0.885	1.011	0.953	1.022	1.011	1.141	1.051	0.953	1.074	0.20942
P97950	Ras-related protein Rab-33A OS=Mus musculus OX=10090 GN=Rab33a	Rab33a	26.54	22.522	24.1	5	5	4	0.98	1.02	0.975	0.977	0.992	1.109	1.04	0.962	1.038	0.3114
P97952	Sodium channel subunit beta-1 OS=Mus musculus OX=10090 GN=Scn1b	Scn1b	24.65	23.052	10.6	3	4	3	1	1.077	0.926	1.048	1.003	1.062	1.033	0.95	0.999	0.99934
P98078	Disabled homolog 2 OS=Mus musculus OX=10090 GN=Dab2	Dab2	82.311	6.7056	6.3	3	3	3	1.096	1.089	1.196	1.169	0.87	0.901	0.829	0.865	0.762	8.1018e-05
P98084	Amyloid-beta A4 precursor protein-binding family A member 2 OS=Mus musculus OX=10090 GN=Apba2	Apba2	82.757	63.02	18.4	11	15	10	1.014	1.044	1.02	0.935	0.986	1.067	0.913	0.948	0.975	0.5533
P98086	Complement C1q subcomponent subunit A OS=Mus musculus OX=10090 GN=C1qa	C1qa	25.974	8.0073	11	2	2	2	0.769	0.872	0.774	0.893	1.078	1.052	1.397	1.19	1.426	0.0034797
P98154	Integral membrane protein DGCR2/IDD OS=Mus musculus OX=10090 GN=Dgcr2	Dgcr2	60.696	3.6416	2.2	1	1	1	1.035	1.029	0.985	1.046	0.909	1.143	0.933	0.944	0.959	0.4636
P98156	Very low-density lipoprotein receptor OS=Mus musculus OX=10090 GN=Vldlr	Vldlr	96.372	36.316	11.7	10	11	10	1.033	0.971	0.984	1.056	1.021	0.951	0.955	1.045	0.982	0.5774
P98191	Phosphatidate cytidylyltransferase 1 OS=Mus musculus OX=10090 GN=Cds1	Cds1	52.875	4.3076	3.3	1	2	1	1.196	0.845	1.069	0.747	1.064	0.736	1.263	1.069	1.071	0.68144
P98192	Dihydroxyacetone phosphate acyltransferase OS=Mus musculus OX=10090 GN=Gnpat	Gnpat	76.869	13.498	10.2	6	6	6
P98195	Probable phospholipid-transporting ATPase IIB OS=Mus musculus OX=10090 GN=Atp9b	Atp9b	129.02	9.7012	8.6	10	11	5	1.028	1.059	0.909	0.906	1.049	1.033	0.981	1.107	1.069	0.20416
P98200	Phospholipid-transporting ATPase IB OS=Mus musculus OX=10090 GN=Atp8a2	Atp8a2	129.42	46.872	9.8	11	14	9	0.975	0.966	0.982	0.985	0.978	1.03	1.015	1.06	1.045	0.045938
P98203	Armadillo repeat protein deleted in velo-cardio-facial syndrome homolog OS=Mus musculus OX=10090 GN=Arvcf	Arvcf	105.06	127.54	32	22	28	22	1.047	1.038	0.953	0.925	1.056	1.002	1.005	0.983	1.021	0.55012
P99024	Tubulin beta-5 chain OS=Mus musculus OX=10090 GN=Tubb5	Tubb5	49.67	70.611	60.1	26	444	4	1.025	0.963	0.954	0.91	1.004	1.046	1.047	1.028	1.071	0.039277
P99026	Proteasome subunit beta type-4 OS=Mus musculus OX=10090 GN=Psmb4	Psmb4	29.116	79.279	28.8	5	14	5	1.044	0.982	0.992	0.978	1.013	1.013	0.995	1.016	1.01	0.53128
P99027	60S acidic ribosomal protein P2 OS=Mus musculus OX=10090 GN=Rplp2	Rplp2	11.651	31.417	60	4	6	4	0.989	1.364	0.897	1.025	0.931	0.988	0.889	0.972	0.884	0.27728
P99028	Cytochrome b-c1 complex subunit 6, mitochondrial OS=Mus musculus OX=10090 GN=Uqcrh	Uqcrh	10.435	21.097	39.3	4	5	4	0.946	1.045	0.976	1.018	1.064	1.021	0.939	0.958	0.999	0.9732
P99029	Peroxiredoxin-5, mitochondrial OS=Mus musculus OX=10090 GN=Prdx5	Prdx5	21.897	96.237	56.7	10	42	10	0.988	0.986	0.989	1.056	0.983	0.977	0.97	1.019	0.983	0.41966
Q00422	GA-binding protein alpha chain OS=Mus musculus OX=10090 GN=Gabpa	Gabpa	51.344	3.4908	4.6	2	2	2	0.935	1.032	0.937	1.181	0.918	1.022	0.933	1.068	0.965	0.6321
Q00493	Carboxypeptidase E OS=Mus musculus OX=10090 GN=Cpe	Cpe	53.255	95.441	35.7	16	33	16	0.947	0.988	0.954	0.973	1.034	1.073	1.001	1.049	1.076	0.0056176
Q00558	Factor VIII intron 22 protein OS=Mus musculus OX=10090 GN=F8a1	F8a1	40.489	32.742	13.7	4	4	4	1.094	0.903	1.098	1.149	0.942	0.904	0.884	1.028	0.885	0.107659
Q00612	Glucose-6-phosphate 1-dehydrogenase X OS=Mus musculus OX=10090 GN=G6pdx	G6pdx	59.262	139.83	40.4	21	30	21	0.967	0.951	0.971	0.988	1.041	1.031	1.036	1.028	1.067	0.00023772
Q00623	Apolipoprotein A-I OS=Mus musculus OX=10090 GN=Apoa1	Apoa1	30.615	67.237	51.9	15	31	15	1.018	0.901	0.977	1.328	0.951	0.999	1.021	0.808	0.895	0.33328
Q00896	Alpha-1-antitrypsin 1-3 OS=Mus musculus OX=10090 GN=Serpina1c	Serpina1c	45.823	61.413	18.2	8	14	3	0.762	0.748	0.766	1.073	1.188	1.184	1.239	1.061	1.395	0.010164
Q00899	Transcriptional repressor protein YY1 OS=Mus musculus OX=10090 GN=Yy1	Yy1	44.716	18.896	12.8	4	4	4	0.988	0.967	0.939	1.035	1.017	0.945	1.118	1.011	1.041	0.36656
Q00915	Retinol-binding protein 1 OS=Mus musculus OX=10090 GN=Rbp1	Rbp1	15.846	40.815	62.2	8	13	8	1.007	0.981	0.981	1.011	1.006	1.054	0.999	1.01	1.022	0.182945
Q00PI9	Heterogeneous nuclear ribonucleoprotein U-like protein 2 OS=Mus musculus OX=10090 GN=Hnrnpul2	Hnrnpul2	84.939	178.96	34.4	25	52	25	0.967	0.941	0.969	0.988	1.031	1.043	1.036	1.027	1.07	0.00065832
Q01063	cAMP-specific 3',5'-cyclic phosphodiesterase 4D OS=Mus musculus OX=10090 GN=Pde4d	Pde4d	84.562	66.676	15.7	11	15	8	0.996	1.049	0.966	1.004	1.028	0.987	0.963	0.982	0.986	0.55546
Q01065	Calcium/calmodulin-dependent 3',5'-cyclic nucleotide phosphodiesterase 1B OS=Mus musculus OX=10090 GN=Pde1b	Pde1b	61.225	70.371	25.2	12	17	11	1.014	1.042	0.997	1.045	0.967	0.936	0.985	1.065	0.965	0.25886
Q01097	Glutamate receptor ionotropic, NMDA 2B OS=Mus musculus OX=10090 GN=Grin2b	Grin2b	165.96	101.38	15.4	22	25	21	0.991	1.034	0.971	0.953	1.057	0.962	1.046	0.984	1.025	0.42574
Q01147	Cyclic AMP-responsive element-binding protein 1 OS=Mus musculus OX=10090 GN=Creb1	Creb1	36.674	13.527	10.6	2	2	2	0.946	0.974	0.788	1.232	1.018	0.999	1.016	1.054	1.037	0.6314
Q01149	Collagen alpha-2(I) chain OS=Mus musculus OX=10090 GN=Col1a2	Col1a2	129.56	30.832	4.2	5	7	5	1.102	1.015	0.967	1.021	1.075	0.948	0.92	1.025	0.967	0.46662
Q01237	3-hydroxy-3-methylglutaryl-coenzyme A reductase OS=Mus musculus OX=10090 GN=Hmgcr	Hmgcr	97.039	17.263	5.6	4	5	4	1.08	1.005	1.017	1.007	0.898	0.943	0.947	0.91	0.9	0.0027362
Q01279	Epidermal growth factor receptor OS=Mus musculus OX=10090 GN=Egfr	Egfr	134.85	57.78	11.7	13	15	12	1.048	1.103	1.037	1.073	0.965	0.948	0.879	0.962	0.881	0.0026768
Q01337	Alpha-2C adrenergic receptor OS=Mus musculus OX=10090 GN=Adra2c	Adra2c	49.906	-2	1.5	1	1	1
Q01338	Alpha-2A adrenergic receptor OS=Mus musculus OX=10090 GN=Adra2a	Adra2a	48.865	2.9939	3.3	1	1	1
Q01405	Protein transport protein Sec23A OS=Mus musculus OX=10090 GN=Sec23a	Sec23a	86.161	139.73	27.6	19	35	17	0.988	1.028	0.985	0.949	0.977	0.985	0.983	1.055	1.013	0.62694
Q01730	Ras suppressor protein 1 OS=Mus musculus OX=10090 GN=Rsu1	Rsu1	31.55	34.153	29.2	9	17	9	1.004	1.035	1.016	1.103	0.96	0.965	0.928	0.999	0.926	0.025641
Q01768	Nucleoside diphosphate kinase B OS=Mus musculus OX=10090 GN=Nme2	Nme2	17.363	16.504	65.1	11	44	5	1.039	0.982	1.031	1.029	1.044	1.006	0.985	0.966	0.98	0.37826
Q01815	Voltage-dependent L-type calcium channel subunit alpha-1C OS=Mus musculus OX=10090 GN=Cacna1c	Cacna1c	240.14	5.2665	1	2	2	2	0.946	0.956	1.03	1.045	1.049	0.928	1.113	0.946	1.015	0.80504
Q01853	Transitional endoplasmic reticulum ATPase OS=Mus musculus OX=10090 GN=Vcp	Vcp	89.321	310.21	56.7	40	124	40	1.012	0.98	1.01	1.034	0.969	0.995	1.001	1.014	0.986	0.36862
Q02053	Ubiquitin-like modifier-activating enzyme 1 OS=Mus musculus OX=10090 GN=Uba1	Uba1	117.81	323.31	41.4	38	112	38	0.982	0.993	0.987	0.945	1.011	1.05	1.043	1.013	1.054	0.0124219
Q02111	Protein kinase C theta type OS=Mus musculus OX=10090 GN=Prkcq	Prkcq	81.572	2.5949	3.5	3	3	2	0.997	1.02	0.847	1.354	0.965	0.927	0.967	0.954	0.904	0.4422
Q02248	Catenin beta-1 OS=Mus musculus OX=10090 GN=Ctnnb1	Ctnnb1	85.47	212.52	36.2	25	70	21	1.044	1.022	0.964	0.999	1.017	0.993	0.965	1.016	0.991	0.67514
Q02257	Junction plakoglobin OS=Mus musculus OX=10090 GN=Jup	Jup	81.8	55.039	22.7	15	24	11	1.001	0.959	1.007	0.935	1.019	1.065	0.997	1.032	1.054	0.056696
Q02357	Ankyrin-1 OS=Mus musculus OX=10090 GN=Ank1	Ank1	204.22	72.405	6.7	11	12	8	1.017	0.984	0.924	1.155	1.051	1.025	0.919	0.909	0.957	0.50148
Q02566	Myosin-6 OS=Mus musculus OX=10090 GN=Myh6	Myh6	223.56	1.8598	1.2	3	5	1
Q02614	SAP30-binding protein OS=Mus musculus OX=10090 GN=Sap30bp	Sap30bp	33.832	4.0139	4.2	1	1	1
Q02780	Nuclear factor 1 A-type OS=Mus musculus OX=10090 GN=Nfia	Nfia	58.552	12.158	11.5	6	8	4	0.953	0.996	0.947	1.282	0.959	1.11	0.952	0.834	0.923	0.4347
Q02819	Nucleobindin-1 OS=Mus musculus OX=10090 GN=Nucb1	Nucb1	53.408	87.538	31.6	12	15	12	0.994	1.002	1.045	1.032	0.971	1.042	0.829	1.059	0.958	0.46688
Q02956	Protein kinase C zeta type OS=Mus musculus OX=10090 GN=Prkcz	Prkcz	67.681	23.604	7.8	4	6	3	0.959	1.009	1.053	0.937	1.051	1.013	1.06	1.02	1.047	0.150658
Q03059	Choline O-acetyltransferase OS=Mus musculus OX=10090 GN=Chat	Chat	71.852	1.8979	2.7	1	1	1
Q03137	Ephrin type-A receptor 4 OS=Mus musculus OX=10090 GN=Epha4	Epha4	109.81	159.75	26.5	22	30	17	1.053	1.053	1.097	0.966	1.002	0.939	1.011	0.934	0.932	0.085379
Q03141	MAP/microtubule affinity-regulating kinase 3 OS=Mus musculus OX=10090 GN=Mark3	Mark3	84.389	124.15	29.9	22	43	11	1.036	1.095	1.055	0.934	0.992	0.994	0.989	0.939	0.95	0.22312
Q03145	Ephrin type-A receptor 2 OS=Mus musculus OX=10090 GN=Epha2	Epha2	108.85	4.5046	3	3	3	1	1.074	1.173	0.899	1.013	1.028	0.957	0.921	0.958	0.929	0.2915
Q03146	Epithelial discoidin domain-containing receptor 1 OS=Mus musculus OX=10090 GN=Ddr1	Ddr1	101.16	3.5403	2.1	1	1	1
Q03147	Cyclin-dependent kinase 7 OS=Mus musculus OX=10090 GN=Cdk7	Cdk7	38.968	4.8627	3.2	1	1	1
Q03157	Amyloid-like protein 1 OS=Mus musculus OX=10090 GN=Aplp1	Aplp1	72.75	27.118	12.6	7	10	7	1.072	1.11	1.176	0.99	0.936	0.859	0.883	0.966	0.838	0.0078154
Q03173	Protein enabled homolog OS=Mus musculus OX=10090 GN=Enah	Enah	85.843	90.61	20.9	14	19	14	0.997	1.004	0.959	1.057	1.029	1.002	0.956	0.944	0.979	0.47452
Q03249	Galactose-1-phosphate uridylyltransferase OS=Mus musculus OX=10090 GN=Galt	Galt	43.232	4.5154	3.4	1	1	1
Q03265	ATP synthase subunit alpha, mitochondrial OS=Mus musculus OX=10090 GN=Atp5f1a	Atp5f1a	59.752	198.29	61.3	35	124	35	0.981	1.005	1.004	1.059	1.004	0.979	0.985	1.006	0.981	0.33556
Q03719	Potassium voltage-gated channel subfamily D member 1 OS=Mus musculus OX=10090 GN=Kcnd1	Kcnd1	71.697	3.1204	5.1	3	5	2
Q03958	Prefoldin subunit 6 OS=Mus musculus OX=10090 GN=Pfdn6	Pfdn6	14.454	17.915	40.2	5	6	5	0.903	0.96	1.054	1.101	0.965	1.06	0.872	1.098	0.994	0.9252
Q04207	Transcription factor p65 OS=Mus musculus OX=10090 GN=Rela	Rela	60.211	10.295	10.7	5	5	5	1.059	1.109	1.001	1.022	0.945	1.01	0.966	0.934	0.92	0.025897
Q04447	Creatine kinase B-type OS=Mus musculus OX=10090 GN=Ckb	Ckb	42.713	323.31	66.9	20	123	19	0.953	0.987	1.009	1.048	1.004	0.973	0.99	1.028	0.999	0.99642
Q04519	Sphingomyelin phosphodiesterase OS=Mus musculus OX=10090 GN=Smpd1	Smpd1	69.926	20.867	7.3	4	4	4	1.04	1.091	1.086	1.015	0.961	0.89	0.898	1.03	0.893	0.024116
Q04690	Neurofibromin OS=Mus musculus OX=10090 GN=Nf1	Nf1	319.59	162.51	15.3	46	60	46	0.993	0.993	0.963	0.96	0.988	1.003	1.022	1.028	1.034	0.04322
Q04692	SWI/SNF-related matrix-associated actin-dependent regulator of chromatin subfamily A containing DEAD/H box 1 OS=Mus musculus OX=10090 GN=Smarcad1	Smarcad1	116.45	4.324	2.8	2	2	2
Q04735	Cyclin-dependent kinase 16 OS=Mus musculus OX=10090 GN=Cdk16	Cdk16	55.913	12.915	16.9	8	11	4	1.011	0.987	1.016	0.996	1.016	0.969	0.976	0.989	0.985	0.2666
Q04736	Tyrosine-protein kinase Yes OS=Mus musculus OX=10090 GN=Yes1	Yes1	60.629	1.5777	10	6	10	1
Q04750	DNA topoisomerase 1 OS=Mus musculus OX=10090 GN=Top1	Top1	90.875	68.946	22.4	15	17	15	0.989	1.083	1.129	1.005	0.881	0.962	0.963	0.933	0.889	0.020839
Q04857	Collagen alpha-1(VI) chain OS=Mus musculus OX=10090 GN=Col6a1	Col6a1	108.49	6.9173	3.6	3	3	3	1.067	1.048	0.99	1.04	0.957	0.973	0.942	1.001	0.934	0.0167031
Q04899	Cyclin-dependent kinase 18 OS=Mus musculus OX=10090 GN=Cdk18	Cdk18	51.847	2.1545	13.7	5	8	1
Q05186	Reticulocalbin-1 OS=Mus musculus OX=10090 GN=Rcn1	Rcn1	38.113	65.489	38.2	12	14	12	0.992	1.102	1.068	1.095	0.971	0.929	0.84	0.954	0.868	0.0123574
Q05512	Serine/threonine-protein kinase MARK2 OS=Mus musculus OX=10090 GN=Mark2	Mark2	86.305	120.32	33.6	24	36	16	1.015	1.041	0.997	0.936	0.983	0.967	1.006	1.056	1.006	0.84748
Q05793	Basement membrane-specific heparan sulfate proteoglycan core protein OS=Mus musculus OX=10090 GN=Hspg2	Hspg2	398.29	95.631	6.9	21	22	21	1.037	1.047	1.027	1.071	1.065	0.936	0.912	0.968	0.928	0.072496
Q05816	Fatty acid-binding protein, epidermal OS=Mus musculus OX=10090 GN=Fabp5	Fabp5	15.137	298.05	72.6	11	93	11	1	1.034	0.978	1.019	0.976	1.036	0.991	1.009	0.995	0.79604
Q05909	Receptor-type tyrosine-protein phosphatase gamma OS=Mus musculus OX=10090 GN=Ptprg	Ptprg	161.24	30.583	5.7	7	7	7	1.056	0.917	0.971	1.062	1.006	1.034	0.999	1.084	1.029	0.47848
Q05920	Pyruvate carboxylase, mitochondrial OS=Mus musculus OX=10090 GN=Pc	Pc	129.68	222.4	29.3	30	55	30	0.991	0.952	1.009	1.11	0.976	0.964	0.984	0.987	0.963	0.35118
Q05A62	Dynein light chain 1, axonemal OS=Mus musculus OX=10090 GN=Dnal1	Dnal1	21.465	23.341	38.9	8	8	8	1.017	1.038	1.033	0.992	0.955	1.05	0.973	0.969	0.967	0.2041
Q05BC3	Echinoderm microtubule-associated protein-like 1 OS=Mus musculus OX=10090 GN=Eml1	Eml1	89.679	78.154	22.5	18	22	17	1.025	1.073	1.022	0.928	1.044	0.977	0.991	0.991	0.989	0.77502
Q05CL8	La-related protein 7 OS=Mus musculus OX=10090 GN=Larp7	Larp7	64.802	26.228	14.2	6	7	6	0.943	0.963	1.014	1.097	0.965	1.079	0.916	1.035	0.995	0.91138
Q05D44	Eukaryotic translation initiation factor 5B OS=Mus musculus OX=10090 GN=Eif5b	Eif5b	137.61	220.61	23.8	25	28	25	1.05	1.028	1.041	1.057	0.993	0.952	0.978	0.962	0.93	0.00060358
Q06138	Calcium-binding protein 39 OS=Mus musculus OX=10090 GN=Cab39	Cab39	39.842	52.759	37.2	14	30	12	0.99	1.018	0.992	0.992	1.016	0.978	1.014	0.996	1.003	0.79974
Q06180	Tyrosine-protein phosphatase non-receptor type 2 OS=Mus musculus OX=10090 GN=Ptpn2	Ptpn2	47.36	7.2742	7.9	3	3	3	1.227	1.021	1.079	1.085	0.821	0.807	0.964	1.005	0.815	0.022602
Q06185	ATP synthase subunit e, mitochondrial OS=Mus musculus OX=10090 GN=Atp5i	Atp5i	8.2355	23.052	33.8	3	11	3	0.995	0.986	1.019	1.274	1.002	0.887	0.915	0.938	0.876	0.101143
Q06335	Amyloid-like protein 2 OS=Mus musculus OX=10090 GN=Aplp2	Aplp2	80.466	43.776	13.2	9	14	8	1.002	0.997	1.025	0.968	1.018	1.022	1.019	1.017	1.021	0.173077
Q06649	SH3 domain-binding protein 2 OS=Mus musculus OX=10090 GN=Sh3bp2	Sh3bp2	62.208	10.572	8.2	4	4	4
Q06890	Clusterin OS=Mus musculus OX=10090 GN=Clu	Clu	51.655	72.808	28.3	11	20	11	1.028	1.02	0.996	1.033	1.015	0.99	0.948	0.956	0.959	0.054657
Q07076	Annexin A7 OS=Mus musculus OX=10090 GN=Anxa7	Anxa7	49.925	82.017	32	13	20	13	1.066	0.999	1.024	0.927	0.985	0.979	1.028	1.01	0.997	0.94174
Q07113	Cation-independent mannose-6-phosphate receptor OS=Mus musculus OX=10090 GN=Igf2r	Igf2r	273.81	76.366	8.6	23	23	23	0.996	1.036	1.034	1.016	1	0.997	0.929	0.974	0.955	0.055138
Q07235	Glia-derived nexin OS=Mus musculus OX=10090 GN=Serpine2	Serpine2	44.207	42.464	31.2	13	17	13	1.021	1.016	0.956	0.978	1.062	0.972	0.979	1.044	1.022	0.47094
Q07409	Contactin-3 OS=Mus musculus OX=10090 GN=Cntn3	Cntn3	113.23	25.021	7.7	8	8	7	0.965	0.955	1.026	0.969	1.035	0.992	1.015	1.031	1.04	0.078439
Q07417	Short-chain specific acyl-CoA dehydrogenase, mitochondrial OS=Mus musculus OX=10090 GN=Acads	Acads	44.889	41.883	21.1	8	11	8	0.915	0.981	1.019	1.155	0.967	1.003	0.945	0.962	0.953	0.40454
Q07456	Protein AMBP OS=Mus musculus OX=10090 GN=Ambp	Ambp	39.029	8.6275	9.2	3	3	3	0.772	0.722	0.743	0.914	1.254	1.238	1.307	1.067	1.544	0.00072454
Q07646	Mesoderm-specific transcript protein OS=Mus musculus OX=10090 GN=Mest	Mest	38.907	9.1681	7.8	3	4	3	0.968	0.983	0.929	0.983	1.02	1.097	1.019	1.012	1.074	0.022445
Q07797	Galectin-3-binding protein OS=Mus musculus OX=10090 GN=Lgals3bp	Lgals3bp	64.49	33.449	5	2	2	2	0.597	0.641	0.925	0.602	1.063	0.961	1.563	1.643	1.892	0.0103152
Q07813	Apoptosis regulator BAX OS=Mus musculus OX=10090 GN=Bax	Bax	21.394	44.491	33.3	5	13	5	0.958	1.065	0.971	0.93	1.047	1.058	1.023	0.991	1.05	0.180276
Q08024	Core-binding factor subunit beta OS=Mus musculus OX=10090 GN=Cbfb	Cbfb	22.03	4.0216	12.3	3	3	3
Q08093	Calponin-2 OS=Mus musculus OX=10090 GN=Cnn2	Cnn2	33.155	5.004	7.2	2	3	1
Q08122	Transducin-like enhancer protein 3 OS=Mus musculus OX=10090 GN=Tle3	Tle3	83.446	29.346	7.4	5	6	3	0.965	1.003	1.087	1.015	0.93	0.986	1.003	1.026	0.969	0.37808
Q08274	Dystrophia myotonica WD repeat-containing protein OS=Mus musculus OX=10090 GN=Dmwd	Dmwd	69.816	35.233	19.2	11	13	11	0.931	0.993	0.959	0.97	1.043	1.035	1.071	1.044	1.088	0.0014759
Q08288	Cell growth-regulating nucleolar protein OS=Mus musculus OX=10090 GN=Lyar	Lyar	43.735	2.8355	2.3	1	1	1
Q08331	Calretinin OS=Mus musculus OX=10090 GN=Calb2	Calb2	31.372	111.95	57.6	18	60	17	0.961	0.94	0.939	1.014	1.05	1.058	0.995	1.065	1.081	0.0164213
Q08460	Calcium-activated potassium channel subunit alpha-1 OS=Mus musculus OX=10090 GN=Kcnma1	Kcnma1	134.39	10.401	4.7	4	4	4	0.887	1.012	0.92	1.058	0.948	1.038	0.927	1.229	1.068	0.44366
Q08481	Platelet endothelial cell adhesion molecule OS=Mus musculus OX=10090 GN=Pecam1	Pecam1	81.262	8.9399	2.8	2	2	2	1	1.012	0.959	0.948	0.979	1.104	0.985	1.031	1.046	0.21644
Q08509	Epidermal growth factor receptor kinase substrate 8 OS=Mus musculus OX=10090 GN=Eps8	Eps8	91.736	113.91	22.2	15	18	15	0.978	1.046	0.975	1.162	1.044	0.978	0.884	0.961	0.929	0.22434
Q08879	Fibulin-1 OS=Mus musculus OX=10090 GN=Fbln1	Fbln1	78.032	12.975	4.8	3	4	3	0.897	0.949	0.935	1.022	0.988	1.047	1.187	1	1.11	0.085161
Q08890	Iduronate 2-sulfatase OS=Mus musculus OX=10090 GN=Ids	Ids	62.185	10.072	7.2	3	3	3	1.015	1.133	1.122	0.902	1.047	0.991	0.861	0.937	0.919	0.26876
Q08943	FACT complex subunit SSRP1 OS=Mus musculus OX=10090 GN=Ssrp1	Ssrp1	80.859	41.169	11.3	8	12	8	0.986	0.949	0.92	0.977	1.001	1.057	0.966	1.089	1.073	0.065297
Q09143	High affinity cationic amino acid transporter 1 OS=Mus musculus OX=10090 GN=Slc7a1	Slc7a1	67.091	49.889	7.6	4	6	4	1.074	1.046	1.071	0.982	0.977	0.964	0.959	0.964	0.926	0.036736
Q09200	Beta-1,4 N-acetylgalactosaminyltransferase 1 OS=Mus musculus OX=10090 GN=B4galnt1	B4galnt1	59.211	9.667	9.9	6	6	6	1.024	0.961	1.112	0.992	1.052	1.056	0.906	0.904	0.958	0.44528
Q09XV5	Chromodomain-helicase-DNA-binding protein 8 OS=Mus musculus OX=10090 GN=Chd8	Chd8	290.84	3.7188	0.7	2	2	2	1.012	0.905	1.003	1.162	0.998	0.973	0.937	1.021	0.963	0.5476
Q0GNC1	Inverted formin-2 OS=Mus musculus OX=10090 GN=Inf2	Inf2	138.56	6.1108	3.2	4	4	4	1.085	1.11	1.073	1.141	0.906	0.771	0.847	1.078	0.817	0.062044
Q0HA38	Tetratricopeptide repeat protein 21B OS=Mus musculus OX=10090 GN=Ttc21b	Ttc21b	150.79	2.5106	0.9	1	1	1
Q0KK55	Kinase non-catalytic C-lobe domain-containing protein 1 OS=Mus musculus OX=10090 GN=Kndc1	Kndc1	191.31	7.8907	3.2	5	5	5	0.867	1.018	1.01	1.213	0.947	1.067	0.975	0.931	0.954	0.60332
Q0KK56	Protein FAM184B OS=Mus musculus OX=10090 GN=Fam184b	Fam184b	107.6	1.8342	2	2	2	2
Q0KL01	UBX domain-containing protein 2B OS=Mus musculus OX=10090 GN=Ubxn2b	Ubxn2b	37.443	4.7606	5.1	2	2	2	1.099	1.104	1.118	1.05	0.965	0.837	0.86	0.976	0.832	0.0042649
Q0KL02	Triple functional domain protein OS=Mus musculus OX=10090 GN=Trio	Trio	347.86	205.85	15.2	44	61	35	0.994	1.046	1.009	0.965	1.001	1.019	1.009	1.025	1.01	0.57906
Q0P5V2	Sine oculis-binding protein homolog OS=Mus musculus OX=10090 GN=Sobp	Sobp	91.783	3.3116	2.1	1	1	1
Q0P5W1	Vacuolar protein sorting-associated protein 8 homolog OS=Mus musculus OX=10090 GN=Vps8	Vps8	161.14	42.087	11.5	15	15	15	1.006	0.964	0.947	0.922	1.087	0.984	1.049	1.003	1.074	0.049298
Q0P678	Zinc finger CCCH domain-containing protein 18 OS=Mus musculus OX=10090 GN=Zc3h18	Zc3h18	105.69	29.939	8.9	8	8	8	0.954	0.985	0.957	1.048	1.025	1.036	0.995	0.918	1.008	0.84386
Q0PHV7	Dapper homolog 3 OS=Mus musculus OX=10090 GN=Dact3	Dact3	63.286	10.488	6.9	4	4	4	1.116	1.093	1.015	0.966	0.99	0.95	0.91	0.879	0.89	0.033455
Q0PMG2	MAM domain-containing glycosylphosphatidylinositol anchor protein 1 OS=Mus musculus OX=10090 GN=Mdga1	Mdga1	104.12	24.681	8.3	6	7	6	1.063	0.897	0.965	1.048	1.005	1.038	1.029	0.935	1.009	0.8352
Q0V8T9	Contactin-associated protein like 5-1 OS=Mus musculus OX=10090 GN=Cntnap5a	Cntnap5a	145.71	19.871	5.2	6	10	6	1.018	1.037	1.018	1.02	0.938	1	0.897	1.017	0.941	0.125763
Q0VBF8	Protein stum homolog OS=Mus musculus OX=10090 GN=Stum	Stum	15.005	31.073	27	3	4	3	0.998	1.006	0.97	0.914	0.966	0.953	1.064	1.142	1.061	0.27796
Q0VDN7	RUN domain-containing protein 1 OS=Mus musculus OX=10090 GN=Rundc1	Rundc1	67.864	1.9235	1.3	1	1	1
Q0VE82	Copine-7 OS=Mus musculus OX=10090 GN=Cpne7	Cpne7	61.89	99.005	35.9	16	22	15	1.055	0.979	1.014	0.933	1.075	0.999	1.024	1.004	1.03	0.36282
Q0VGB7	Serine/threonine-protein phosphatase 4 regulatory subunit 2 OS=Mus musculus OX=10090 GN=Ppp4r2	Ppp4r2	46.478	30.89	15.8	6	6	6	1.047	1.034	1.044	1.034	1.019	0.899	0.97	0.937	0.92	0.05056
Q11011	Puromycin-sensitive aminopeptidase OS=Mus musculus OX=10090 GN=Npepps	Npepps	103.32	283.95	49.3	41	73	41	0.99	0.993	1.03	1.007	1.007	0.983	0.992	0.992	0.989	0.31066
Q11136	Xaa-Pro dipeptidase OS=Mus musculus OX=10090 GN=Pepd	Pepd	55.028	78.63	29.4	12	17	12	1.032	0.996	1.027	1.024	0.906	1.036	0.968	0.989	0.956	0.162116
Q148V7	LisH domain and HEAT repeat-containing protein KIAA1468 OS=Mus musculus OX=10090 GN=Kiaa1468	Kiaa1468	134.59	235.94	35.3	31	42	31	1.003	1.003	1.015	0.956	1.019	1.036	1.012	0.974	1.016	0.42416
Q149F3	Eukaryotic peptide chain release factor GTP-binding subunit ERF3B OS=Mus musculus OX=10090 GN=Gspt2	Gspt2	69.146	51.373	16.3	12	19	3	0.964	1.136	0.959	1.04	1.021	1.019	0.985	0.903	0.958	0.43062
Q149L6	DnaJ homolog subfamily B member 14 OS=Mus musculus OX=10090 GN=Dnajb14	Dnajb14	42.325	13.081	10	4	4	4	1.058	1.047	1.071	1.099	0.928	1.006	0.822	0.984	0.875	0.060515
Q14BB9	MAP6 domain-containing protein 1 OS=Mus musculus OX=10090 GN=Map6d1	Map6d1	20.432	1.8069	6.8	1	1	1
Q14BI2	Metabotropic glutamate receptor 2 OS=Mus musculus OX=10090 GN=Grm2	Grm2	95.886	37.208	13.1	11	16	7	1.019	1.033	1.119	1.016	0.985	0.925	0.94	1.04	0.929	0.078356
Q14BV6	Carbohydrate deacetylase OS=Mus musculus OX=10090 GN=Ydjc	Ydjc	33.093	8.9183	7.1	2	2	2	1.074	0.976	0.976	1.014	0.947	1.039	0.989	1.001	0.984	0.61396
Q14C51	Pentatricopeptide repeat domain-containing protein 3, mitochondrial OS=Mus musculus OX=10090 GN=Ptcd3	Ptcd3	77.795	47.276	20	12	16	12	1.02	1.002	0.979	0.948	0.987	1.048	0.973	1.024	1.021	0.40558
Q14CH0	Protein FAM171B OS=Mus musculus OX=10090 GN=Fam171b	Fam171b	92.044	29.734	7.9	5	6	5	1.018	1.087	1.166	0.898	1.077	1.003	0.907	0.852	0.921	0.32304
Q14CH7	Alanine--tRNA ligase, mitochondrial OS=Mus musculus OX=10090 GN=Aars2	Aars2	106.78	25.964	9.1	9	9	9	1.025	1.024	1.039	1.08	0.929	0.94	0.986	1.024	0.931	0.030422
Q1HFZ0	tRNA (cytosine(34)-C(5))-methyltransferase OS=Mus musculus OX=10090 GN=Nsun2	Nsun2	85.451	66.198	26.2	19	22	19	0.999	0.957	1.037	1.047	0.971	1.037	0.976	0.954	0.975	0.38786
Q1RLL3	Copine-9 OS=Mus musculus OX=10090 GN=Cpne9	Cpne9	61.851	5.07	16.3	8	12	3
Q2EMV9	Poly [ADP-ribose] polymerase 14 OS=Mus musculus OX=10090 GN=Parp14	Parp14	203.8	1.4012	0.4	1	2	1	1.002	0.965	0.971	0.954	0.966	1.033	1.057	1.067	1.059	0.06074
Q2HXL6	ER degradation-enhancing alpha-mannosidase-like protein 3 OS=Mus musculus OX=10090 GN=Edem3	Edem3	104.2	19.1	5.2	4	4	4	0.983	1.008	1.026	0.965	1.015	1.05	1.036	0.935	1.014	0.67894
Q2KN98	Cytospin-A OS=Mus musculus OX=10090 GN=Specc1l	Specc1l	124.49	39.967	10.3	12	14	12	1.004	1.012	0.922	1.001	1	1.034	0.965	1.025	1.022	0.44838
Q2M3X8	Phosphatase and actin regulator 1 OS=Mus musculus OX=10090 GN=Phactr1	Phactr1	66.285	43.626	17.4	10	12	8	0.9	0.927	0.977	0.894	1.014	1.029	1.157	1.043	1.147	0.0091568
Q2NL51	Glycogen synthase kinase-3 alpha OS=Mus musculus OX=10090 GN=Gsk3a	Gsk3a	51.66	80.527	32.9	13	27	6	1.011	1.001	1.022	0.983	1.013	0.98	1.019	0.969	0.991	0.56098
Q2PFD7	PH and SEC7 domain-containing protein 3 OS=Mus musculus OX=10090 GN=Psd3	Psd3	114.72	107.8	18.2	22	39	22	1.014	1.025	1.038	0.942	1.024	0.987	0.994	0.99	0.994	0.82522
Q2PZL6	Protocadherin Fat 4 OS=Mus musculus OX=10090 GN=Fat4	Fat4	540.31	6.9151	1.2	5	5	5
Q2TBE6	Phosphatidylinositol 4-kinase type 2-alpha OS=Mus musculus OX=10090 GN=Pi4k2a	Pi4k2a	54.257	22.51	16.7	8	10	8	1.017	1.013	0.985	1.011	0.944	0.917	0.965	0.969	0.943	0.0066383
Q2TPA8	Hydroxysteroid dehydrogenase-like protein 2 OS=Mus musculus OX=10090 GN=Hsdl2	Hsdl2	54.208	81.201	29.6	13	17	13	0.985	1.016	1.012	1.209	1.015	0.963	0.912	0.969	0.914	0.142961
Q2TV84	Transient receptor potential cation channel subfamily M member 1 OS=Mus musculus OX=10090 GN=Trpm1	Trpm1	183.52	3.7507	1	2	2	1
Q2VPD4	Aryl hydrocarbon receptor nuclear translocator-like protein 2 OS=Mus musculus OX=10090 GN=Arntl2	Arntl2	64.398	-2	1.7	1	1	1
Q2VPU4	MLX-interacting protein OS=Mus musculus OX=10090 GN=Mlxip	Mlxip	100.8	2.3416	1.1	1	1	1
Q2VWQ2	Protein kinase C-binding protein NELL1 OS=Mus musculus OX=10090 GN=Nell1	Nell1	89.414	3.2224	2.1	2	2	2	0.912	1.021	0.963	1.028	0.984	0.927	1.066	1.118	1.044	0.44276
Q2WF71	Leucine-rich repeat and fibronectin type III domain-containing protein 1 OS=Mus musculus OX=10090 GN=Lrfn1	Lrfn1	81.944	12.647	6.5	4	5	4	1.164	1.083	0.997	0.975	1.026	0.941	1.025	0.807	0.9	0.174716
Q2YDW2	Protein misato homolog 1 OS=Mus musculus OX=10090 GN=Msto1	Msto1	61.23	24.779	16.7	9	11	9	1.016	1.022	1.01	1.046	0.952	0.906	0.952	1.019	0.935	0.036864
Q31125	Zinc transporter SLC39A7 OS=Mus musculus OX=10090 GN=Slc39a7	Slc39a7	50.656	19.383	7.6	3	6	3	0.982	0.943	1.059	1.165	0.914	0.992	0.962	1.008	0.934	0.2486
Q32NY4	Metal transporter CNNM3 OS=Mus musculus OX=10090 GN=Cnnm3	Cnnm3	76.278	16.767	8.3	5	5	5	0.968	0.884	0.959	0.991	0.999	1.099	1.095	1.049	1.116	0.0167591
Q3B7Z2	Oxysterol-binding protein 1 OS=Mus musculus OX=10090 GN=Osbp	Osbp	88.796	136.04	33.4	19	25	17	0.988	1.004	1.066	1.016	0.995	0.975	0.987	0.925	0.953	0.082416
Q3KNM2	E3 ubiquitin-protein ligase MARCH5 OS=Mus musculus OX=10090 GN=March5	March5	31.231	27.504	25.5	6	6	6	0.995	0.861	0.908	1.055	1.044	1.093	1.146	1.056	1.136	0.040784
Q3SXD3	HD domain-containing protein 2 OS=Mus musculus OX=10090 GN=Hddc2	Hddc2	22.753	78.907	46.7	6	8	6	0.98	0.959	0.953	0.976	0.994	1.005	1.059	1.053	1.063	0.0131998
Q3TAS6	ER membrane protein complex subunit 10 OS=Mus musculus OX=10090 GN=Emc10	Emc10	27.052	25.382	13.6	3	7	3	1.04	1.047	1.046	1.076	0.95	0.951	0.941	0.983	0.909	0.00022378
Q3TB82	Pleckstrin homology domain-containing family F member 1 OS=Mus musculus OX=10090 GN=Plekhf1	Plekhf1	31.157	3.6262	3.6	1	2	1	1.011	0.88	0.998	0.919	0.981	1.053	1.193	0.979	1.105	0.137504
Q3TBL6	Tumor necrosis factor alpha-induced protein 8-like protein 3 OS=Mus musculus OX=10090 GN=Tnfaip8l3	Tnfaip8l3	23.242	2.6192	4.4	1	1	1
Q3TC46	Protein PAT1 homolog 1 OS=Mus musculus OX=10090 GN=Patl1	Patl1	86.769	11.319	3.4	2	2	2	1.107	1.03	1.015	0.952	1.025	0.837	1.044	0.999	0.952	0.41582
Q3TC72	Fumarylacetoacetate hydrolase domain-containing protein 2A OS=Mus musculus OX=10090 GN=Fahd2	Fahd2	34.69	24.561	17.6	4	8	4	1.013	0.97	1.006	1.033	1.003	0.928	0.971	1.036	0.979	0.45162
Q3TC93	HCLS1-binding protein 3 OS=Mus musculus OX=10090 GN=Hs1bp3	Hs1bp3	43.691	8.5276	11.9	4	4	4	1.021	1.136	0.959	1.043	1.016	1.086	1.086	0.987	1.004	0.91356
Q3TCH7	Cullin-4A OS=Mus musculus OX=10090 GN=Cul4a	Cul4a	87.752	25.028	23.8	18	20	9	1.116	0.98	0.969	1.042	0.987	1.003	0.938	0.982	0.952	0.22668
Q3TCJ1	BRISC complex subunit Abraxas 2 OS=Mus musculus OX=10090 GN=Abraxas2	Abraxas2	46.942	67.772	26.7	9	13	9	0.961	1.041	1.026	1.003	0.969	1.039	0.991	0.971	0.985	0.5471
Q3TCN2	Putative phospholipase B-like 2 OS=Mus musculus OX=10090 GN=Plbd2	Plbd2	66.289	55.633	14.6	6	8	6	0.938	0.986	1.027	0.919	1.052	0.908	1.067	1.022	1.046	0.35824
Q3TCX3	KH homology domain-containing protein 4 OS=Mus musculus OX=10090 GN=Khdc4	Khdc4	64.562	3.0541	1.6	1	1	1
Q3TDD9	Protein phosphatase 1 regulatory subunit 21 OS=Mus musculus OX=10090 GN=Ppp1r21	Ppp1r21	88.337	207.8	40.9	28	36	28	0.985	1.016	1.001	0.959	1.033	1.049	1.018	0.991	1.033	0.111038
Q3TDK6	Protein rogdi homolog OS=Mus musculus OX=10090 GN=Rogdi	Rogdi	32.1	48.408	35.5	8	10	8	1.019	1.011	1.022	0.988	1.033	0.984	0.904	1.047	0.982	0.60682
Q3TDN2	FAS-associated factor 2 OS=Mus musculus OX=10090 GN=Faf2	Faf2	52.471	76.331	27.2	10	16	10	0.972	1.035	0.971	1.041	1.057	1.016	0.977	0.967	1	0.98442
Q3TDQ1	Dolichyl-diphosphooligosaccharide--protein glycosyltransferase subunit STT3B OS=Mus musculus OX=10090 GN=Stt3b	Stt3b	93.245	51.597	11.5	9	10	9	1.032	1.005	1.043	1.004	0.981	0.988	0.976	0.968	0.958	0.0066243
Q3TDX8	Cytochrome b5 reductase 4 OS=Mus musculus OX=10090 GN=Cyb5r4	Cyb5r4	59.716	4.712	3.4	2	2	2
Q3TEA8	Heterochromatin protein 1-binding protein 3 OS=Mus musculus OX=10090 GN=Hp1bp3	Hp1bp3	60.866	29.729	18.6	11	15	11	0.79	0.925	1.036	0.975	0.786	1.27	1.27	1.048	1.174	0.2926
Q3TES0	IQ motif and SEC7 domain-containing protein 3 OS=Mus musculus OX=10090 GN=Iqsec3	Iqsec3	129.12	45.486	11.5	12	15	11	0.865	0.985	0.945	0.997	1.001	1.043	1.03	1.045	1.086	0.046555
Q3TFD2	Lysophosphatidylcholine acyltransferase 1 OS=Mus musculus OX=10090 GN=Lpcat1	Lpcat1	59.743	41.911	14.6	6	10	6	0.977	0.992	0.968	0.969	0.957	1.021	1.057	1.004	1.034	0.175617
Q3TFQ1	SPRY domain-containing protein 7 OS=Mus musculus OX=10090 GN=Spryd7	Spryd7	21.681	22.994	33.2	6	9	6	1.112	0.999	0.954	0.972	0.93	1.104	0.878	1.005	0.97	0.61362
Q3TGW2	Endonuclease/exonuclease/phosphatase family domain-containing protein 1 OS=Mus musculus OX=10090 GN=Eepd1	Eepd1	62.953	9.8669	7.6	4	4	4
Q3THE2	Myosin regulatory light chain 12B OS=Mus musculus OX=10090 GN=Myl12b	Myl12b	19.779	48.469	37.8	5	11	5	0.973	1.021	1.083	0.998	1.031	0.953	0.907	1.032	0.963	0.35968
Q3THG9	Alanyl-tRNA editing protein Aarsd1 OS=Mus musculus OX=10090 GN=Aarsd1	Aarsd1	44.97	24.737	21.8	8	10	8	0.996	0.965	0.951	0.878	0.982	1.059	1.006	0.964	1.058	0.140916
Q3THJ3	Probable RNA-binding protein EIF1AD OS=Mus musculus OX=10090 GN=Eif1ad	Eif1ad	19.52	5.767	9.4	1	1	1
Q3THK3	General transcription factor IIF subunit 1 OS=Mus musculus OX=10090 GN=Gtf2f1	Gtf2f1	57.241	9.9875	10	4	5	4
Q3THK7	GMP synthase [glutamine-hydrolyzing] OS=Mus musculus OX=10090 GN=Gmps	Gmps	76.723	177.67	43.6	28	45	28	0.972	1.005	0.971	0.982	1.01	1.055	1.053	0.977	1.042	0.088755
Q3THS6	S-adenosylmethionine synthase isoform type-2 OS=Mus musculus OX=10090 GN=Mat2a	Mat2a	43.688	84.68	35.7	13	18	13	0.959	0.976	0.964	0.963	1.01	0.985	1.05	0.994	1.046	0.022581
Q3THW5	Histone H2A.V OS=Mus musculus OX=10090 GN=H2afv	H2afv	13.509	18.408	31.2	4	10	2	0.896	0.968	1.027	1.133	0.948	1.117	1.037	0.958	1.009	0.8738
Q3TIR1	Trafficking protein particle complex subunit 13 OS=Mus musculus OX=10090 GN=Trappc13	Trappc13	46.476	18.994	16.8	7	7	7	0.966	1.038	0.998	0.977	1.093	1.005	0.96	0.98	1.015	0.68534
Q3TIR3	Synembryn-A OS=Mus musculus OX=10090 GN=Ric8a	Ric8a	59.846	33.092	15.8	7	9	6	1.06	1.019	1.11	0.965	1.105	0.986	0.908	0.936	0.947	0.32898
Q3TIU4	2',5'-phosphodiesterase 12 OS=Mus musculus OX=10090 GN=Pde12	Pde12	67.513	30.166	14.8	7	7	7	1.074	0.955	1.031	0.895	0.953	1.084	1.02	1	1.026	0.59994
Q3TIV5	Zinc finger CCCH domain-containing protein 15 OS=Mus musculus OX=10090 GN=Zc3h15	Zc3h15	48.327	29.491	23.2	10	11	10	1.062	0.898	1.02	1	0.987	0.975	1.044	0.946	0.993	0.89286
Q3TIX9	U4/U6.U5 tri-snRNP-associated protein 2 OS=Mus musculus OX=10090 GN=Usp39	Usp39	65.146	18.755	14.9	7	8	7	0.97	1.018	0.916	0.927	1.068	1.018	1.113	0.977	1.09	0.060164
Q3TJZ6	Protein FAM98A OS=Mus musculus OX=10090 GN=Fam98a	Fam98a	55.055	50.948	15.9	6	10	5	1.08	1.006	1.009	1.061	1.031	0.942	0.88	0.948	0.915	0.050419
Q3TKT4	Transcription activator BRG1 OS=Mus musculus OX=10090 GN=Smarca4	Smarca4	181.43	107.95	14.5	22	29	14	0.999	1.049	1.009	0.954	1.008	0.995	1.017	0.985	0.999	0.96306
Q3TKY6	Peptidyl-prolyl cis-trans isomerase CWC27 homolog OS=Mus musculus OX=10090 GN=Cwc27	Cwc27	53.542	19.757	13	3	4	3	1.013	1.005	0.9	0.97	1.024	1.066	1.052	0.993	1.064	0.09304
Q3TL44	NLR family member X1 OS=Mus musculus OX=10090 GN=Nlrx1	Nlrx1	107.83	22.44	8.4	7	8	7	0.98	1.045	1.004	0.794	1.008	1.104	1.036	1.044	1.097	0.182099
Q3TLD5	Unconventional prefoldin RPB5 interactor OS=Mus musculus OX=10090 GN=Uri1	Uri1	59.083	1.5901	2.1	1	1	1	1.054	1.005	0.987	0.897	0.986	1.064	0.994	1.027	1.032	0.41648
Q3TLH4	Protein PRRC2C OS=Mus musculus OX=10090 GN=Prrc2c	Prrc2c	310.89	111.84	13.1	33	36	32	1.023	0.995	1.058	1.002	1.033	0.955	0.979	0.924	0.954	0.132
Q3TLI0	Trafficking protein particle complex subunit 10 OS=Mus musculus OX=10090 GN=Trappc10	Trappc10	141.59	57.954	12.5	15	19	15	1.025	0.976	0.971	0.974	1.04	1.03	0.99	1.039	1.039	0.070735
Q3TLS3	GDP-D-glucose phosphorylase 1 OS=Mus musculus OX=10090 GN=Gdpgp1	Gdpgp1	42.514	23.013	19.4	6	7	6	1.133	0.802	0.934	0.991	0.905	1.089	1.173	0.988	1.076	0.43398
Q3TMH2	Secernin-3 OS=Mus musculus OX=10090 GN=Scrn3	Scrn3	47.661	10.222	8.9	3	5	3	1.079	1.006	0.956	1.151	0.96	0.858	0.976	1.031	0.912	0.153644
Q3TMP8	Trimeric intracellular cation channel type A OS=Mus musculus OX=10090 GN=Tmem38a	Tmem38a	33.309	1.5273	3.4	1	2	1	0.997	1.116	1.095	0.964	1.058	0.967	0.888	0.926	0.92	0.157481
Q3TNH5	Protein FAM172A OS=Mus musculus OX=10090 GN=Fam172a	Fam172a	48.072	5.2788	7.4	3	3	3
Q3TPE9	Ankyrin repeat and MYND domain-containing protein 2 OS=Mus musculus OX=10090 GN=Ankmy2	Ankmy2	48.774	47.896	27.5	12	16	12	0.961	1.039	1.001	0.996	1	1.001	1	0.985	0.997	0.89328
Q3TPX4	Exocyst complex component 5 OS=Mus musculus OX=10090 GN=Exoc5	Exoc5	81.737	113.47	29.4	19	24	19	1.011	0.991	1.011	0.957	1.009	1.048	1.006	1.01	1.026	0.162683
Q3TQB2	FAD-dependent oxidoreductase domain-containing protein 1 OS=Mus musculus OX=10090 GN=Foxred1	Foxred1	54.177	9.5212	10.7	5	5	5	0.899	0.983	0.812	0.848	1.07	0.985	1.324	1.104	1.266	0.021016
Q3TQI7	Telomere length and silencing protein 1 homolog OS=Mus musculus OX=10090	---	33.543	6.5852	6.9	2	2	2	0.95	1.033	1.013	1.046	1.007	0.964	0.968	1.032	0.982	0.54106
Q3TRM4	Neuropathy target esterase OS=Mus musculus OX=10090 GN=Pnpla6	Pnpla6	149.54	6.2643	2.1	3	4	3	0.911	0.991	1.015	1.108	0.975	0.873	0.981	1.158	0.991	0.8688
Q3TRR0	Microtubule-associated protein 9 OS=Mus musculus OX=10090 GN=Map9	Map9	73.51	5.8678	4.5	3	3	3	1.018	1.024	1.019	0.96	1.009	0.941	0.951	1.087	0.992	0.80216
Q3TSG4	RNA demethylase ALKBH5 OS=Mus musculus OX=10090 GN=Alkbh5	Alkbh5	44.41	4.6948	4.8	2	2	2	0.989	0.876	0.913	1.045	0.987	1.031	1.119	1.057	1.097	0.095138
Q3TTA7	E3 ubiquitin-protein ligase CBL-B OS=Mus musculus OX=10090 GN=Cblb	Cblb	109.09	1.6958	3.9	4	4	1
Q3TUA9	Protein O-mannose kinase OS=Mus musculus OX=10090 GN=Pomk	Pomk	39.968	10.15	9.7	4	4	4	0.989	0.952	0.995	0.994	0.97	1.01	0.98	1.121	1.038	0.3373
Q3TUH1	Phosphatidate cytidylyltransferase, mitochondrial OS=Mus musculus OX=10090 GN=Tamm41	Tamm41	37.827	8.1125	12.2	5	6	5
Q3TV65	MPN domain-containing protein OS=Mus musculus OX=10090 GN=Mpnd	Mpnd	53.376	4.8346	3.3	1	1	1
Q3TVA9	Coiled-coil domain-containing protein 136 OS=Mus musculus OX=10090 GN=Ccdc136	Ccdc136	131.93	52.943	7.6	7	7	7	0.986	0.97	0.97	1.116	1.086	0.961	0.915	1.015	0.984	0.753
Q3TVC7	Cyclin-D1-binding protein 1 OS=Mus musculus OX=10090 GN=Ccndbp1	Ccndbp1	39.355	1.7459	2	1	1	1
Q3TVI8	Pre-B-cell leukemia transcription factor-interacting protein 1 OS=Mus musculus OX=10090 GN=Pbxip1	Pbxip1	81.163	47.236	11.7	7	8	7	1.131	1.081	1.061	1.076	0.957	0.827	0.83	1.061	0.845	0.067535
Q3TW96	UDP-N-acetylhexosamine pyrophosphorylase-like protein 1 OS=Mus musculus OX=10090 GN=Uap1l1	Uap1l1	56.613	18.158	13.6	8	9	8	1.02	1.022	0.972	0.99	0.966	1.043	0.989	1.088	1.02	0.5329
Q3TWF6	WD repeat-containing protein 70 OS=Mus musculus OX=10090 GN=Wdr70	Wdr70	73.118	10.121	4.9	3	3	3	1.006	0.932	1.024	1.065	1.022	1.108	0.921	0.936	0.99	0.82822
Q3TWI9	CSC1-like protein 2 OS=Mus musculus OX=10090 GN=Tmem63b	Tmem63b	94.774	53.537	12.6	10	13	10	0.95	1.055	0.988	0.974	1.029	1.03	0.979	1.022	1.023	0.38718
Q3TWL2	Type 1 phosphatidylinositol 4,5-bisphosphate 4-phosphatase OS=Mus musculus OX=10090 GN=Pip4p1	Pip4p1	30.047	15.811	19.4	6	10	5	0.975	1.121	1.031	1.004	1.009	0.94	0.923	0.961	0.928	0.083183
Q3TWN3	Metal transporter CNNM2 OS=Mus musculus OX=10090 GN=Cnnm2	Cnnm2	96.703	13.134	5.6	6	6	4	1.01	1.043	0.953	1.024	0.999	1.016	0.953	1.02	0.99	0.69498
Q3TWW8	Serine/arginine-rich splicing factor 6 OS=Mus musculus OX=10090 GN=Srsf6	Srsf6	39.025	29.34	28.9	11	16	7	0.995	0.954	0.976	1.116	0.969	1.082	0.995	0.914	0.98	0.6965
Q3TX08	tRNA (guanine(26)-N(2))-dimethyltransferase OS=Mus musculus OX=10090 GN=Trmt1	Trmt1	72.349	39.313	11.5	6	7	6	0.969	1.091	0.954	0.973	0.936	1.001	1.08	0.968	0.999	0.99188
Q3TXS7	26S proteasome non-ATPase regulatory subunit 1 OS=Mus musculus OX=10090 GN=Psmd1	Psmd1	105.73	265.42	41.6	35	68	35	1.006	0.96	1.001	1.009	0.965	1.042	1.009	1.006	1.012	0.5838
Q3TXU5	Deoxyhypusine synthase OS=Mus musculus OX=10090 GN=Dhps	Dhps	40.642	9.8017	8.4	3	3	3	0.856	1.044	0.99	1.095	0.942	1.134	0.976	0.99	1.014	0.82104
Q3TXX3	Protrudin OS=Mus musculus OX=10090 GN=Zfyve27	Zfyve27	46.202	9.0803	6.5	2	3	2	0.973	1.043	0.98	1.031	0.897	1.068	0.922	1.108	0.992	0.84036
Q3TXX4	Vesicular glutamate transporter 1 OS=Mus musculus OX=10090 GN=Slc17a7	Slc17a7	61.637	47.22	15.9	10	15	8	1.056	1.031	1.054	0.913	1.092	0.923	0.999	0.931	0.973	0.61318
Q3TY60	Protein FAM131B OS=Mus musculus OX=10090 GN=Fam131b	Fam131b	35.958	20.736	7.8	2	4	2	1	0.951	0.973	1.015	1.014	1.06	0.998	1.009	1.036	0.120679
Q3TY65	Islet cell autoantigen 1-like protein OS=Mus musculus OX=10090 GN=Ica1l	Ica1l	48.159	25.474	15.8	6	7	5	1.072	0.983	0.953	1.011	1.006	0.995	0.954	1.039	0.994	0.85686
Q3TYA6	M-phase phosphoprotein 8 OS=Mus musculus OX=10090 GN=Mphosph8	Mphosph8	97.466	3.5322	2.6	3	3	3	1.052	1.024	0.979	1.051	1.007	1.027	1.015	0.866	0.953	0.29892
Q3TYD6	Serine/threonine-protein kinase LMTK2 OS=Mus musculus OX=10090 GN=Lmtk2	Lmtk2	160.51	39.563	9.5	12	13	12	1	0.936	1.068	0.915	1.08	0.97	0.934	0.921	0.996	0.94324
Q3TYS2	Uncharacterized protein C17orf62 homolog OS=Mus musculus OX=10090	---	20.921	5.4584	5.3	1	1	1	0.886	0.798	0.79	1.013	0.976	0.969	1.138	1.439	1.297	0.060684
Q3TYX3	SET and MYND domain-containing protein 5 OS=Mus musculus OX=10090 GN=Smyd5	Smyd5	47.095	16.225	11.5	4	5	4	1.034	1.028	0.981	0.804	0.988	1.166	1.028	0.987	1.084	0.28688
Q3TZM9	GDP-Man:Man(3)GlcNAc(2)-PP-Dol alpha-1,2-mannosyltransferase OS=Mus musculus OX=10090 GN=Alg11	Alg11	55.269	4.1347	3.3	2	2	2
Q3TZX3	Solute carrier family 25 member 33 OS=Mus musculus OX=10090 GN=Slc25a33	Slc25a33	35.063	2.5569	5.3	2	2	2	0.989	0.931	1.011	0.981	1.039	1.076	1.022	0.963	1.048	0.159423
Q3TZX8	Polynucleotide 5'-hydroxyl-kinase NOL9 OS=Mus musculus OX=10090 GN=Nol9	Nol9	80.839	5.6503	5.2	4	4	4	1.059	1.103	1.016	0.918	0.963	1.055	1.01	0.898	0.958	0.45458
Q3TZZ7	Extended synaptotagmin-2 OS=Mus musculus OX=10090 GN=Esyt2	Esyt2	94.138	65.834	24.1	16	22	16	1.034	1.008	1.055	0.897	0.947	0.976	1.058	1.006	0.998	0.98838
Q3U0B3	Dehydrogenase/reductase SDR family member 11 OS=Mus musculus OX=10090 GN=Dhrs11	Dhrs11	28.274	2.0139	4.2	1	1	1
Q3U0J8	TBC1 domain family member 2B OS=Mus musculus OX=10090 GN=Tbc1d2b	Tbc1d2b	109.95	-2	1.5	1	1	1
Q3U0M1	Trafficking protein particle complex subunit 9 OS=Mus musculus OX=10090 GN=Trappc9	Trappc9	128.23	81.844	17	21	27	21	0.976	0.968	1	1.019	1.009	1.016	1.028	0.972	1.016	0.39222
Q3U0S6	Ras-interacting protein 1 OS=Mus musculus OX=10090 GN=Rasip1	Rasip1	103.56	6.921	3.1	2	3	2	1.088	0.944	1.009	1.146	0.929	1.109	1.094	0.928	0.97	0.64338
Q3U0V1	Far upstream element-binding protein 2 OS=Mus musculus OX=10090 GN=Khsrp	Khsrp	76.775	296.41	48.8	30	61	27	0.989	0.962	0.984	0.933	1.01	1.072	1.084	0.989	1.074	0.034079
Q3U186	Probable arginine--tRNA ligase, mitochondrial OS=Mus musculus OX=10090 GN=Rars2	Rars2	65.335	29.028	15.2	9	11	9	1.017	1.01	0.966	1.02	1.011	0.983	0.966	1.064	1.003	0.9285
Q3U1F9	Phosphoprotein associated with glycosphingolipid-enriched microdomains 1 OS=Mus musculus OX=10090 GN=Pag1	Pag1	46.549	19.094	12.8	4	4	4	0.808	0.865	0.99	1.022	1.138	1.244	1.099	0.854	1.176	0.158462
Q3U1J4	DNA damage-binding protein 1 OS=Mus musculus OX=10090 GN=Ddb1	Ddb1	126.85	210.79	34.8	39	58	39	0.998	0.975	0.995	1.014	1.011	1.014	1.011	1.002	1.014	0.147659
Q3U1V6	Ubiquitin-conjugating enzyme E2 variant 3 OS=Mus musculus OX=10090 GN=Uevld	Uevld	51.681	6.8595	2.3	1	1	1	0.959	0.856	1.001	1.091	1.042	1.044	1.036	0.982	1.05	0.3546
Q3U1Y4	DENN domain-containing protein 4B OS=Mus musculus OX=10090 GN=Dennd4b	Dennd4b	164.74	4.594	2.1	3	3	3
Q3U213	Protein SERAC1 OS=Mus musculus OX=10090 GN=Serac1	Serac1	73.987	3.7133	1.7	1	1	1	1.025	1.143	1.054	1.086	0.943	0.989	0.856	0.926	0.862	0.0078423
Q3U214	Microtubule-associated serine/threonine-protein kinase 3 OS=Mus musculus OX=10090 GN=Mast3	Mast3	144.17	10.019	4.8	6	6	3	1.224	0.959	0.997	0.961	1.126	0.849	1.046	0.842	0.933	0.47014
Q3U2A8	Valine--tRNA ligase, mitochondrial OS=Mus musculus OX=10090 GN=Vars2	Vars2	118.46	13.282	4.6	4	4	4	0.873	1.017	0.917	0.955	1.173	0.964	1.05	1.064	1.13	0.056797
Q3U2I3	FTS and Hook-interacting protein OS=Mus musculus OX=10090 GN=Fam160a2	Fam160a2	106.54	78.459	18.6	12	13	12	1.017	0.972	0.983	0.859	1.05	1.031	1.015	1.009	1.072	0.158237
Q3U2J5	Calmodulin-lysine N-methyltransferase OS=Mus musculus OX=10090 GN=Camkmt	Camkmt	35.886	2.3352	4.6	2	2	2
Q3U2K0	Protein FAM193B OS=Mus musculus OX=10090 GN=Fam193b	Fam193b	95.083	10.933	3.7	2	2	2	1.101	0.937	1.057	0.989	1.039	1.012	1.021	0.855	0.962	0.51132
Q3U2P1	Protein transport protein Sec24A OS=Mus musculus OX=10090 GN=Sec24a	Sec24a	118.78	49.224	9.7	9	10	9	0.933	0.985	1.025	1.134	1.003	1.045	0.94	0.969	0.971	0.57266
Q3U308	Cytoplasmic tRNA 2-thiolation protein 2 OS=Mus musculus OX=10090 GN=Ctu2	Ctu2	56.104	41.843	12.6	5	6	5	0.993	1.019	0.973	0.986	1.007	1.009	0.998	0.954	0.999	0.95922
Q3U319	E3 ubiquitin-protein ligase BRE1B OS=Mus musculus OX=10090 GN=Rnf40	Rnf40	113.97	10.153	7.5	7	8	6	0.966	1.013	1.006	1.059	0.973	1.148	0.854	0.999	0.983	0.73574
Q3U3E2	Protein FAM117B OS=Mus musculus OX=10090 GN=Fam117b	Fam117b	61.344	24.563	15.9	8	8	8	0.97	1.06	0.966	0.961	0.928	1.142	1.024	0.975	1.028	0.62592
Q3U3N6	AP-4 complex accessory subunit Tepsin OS=Mus musculus OX=10090 GN=Tepsin	Tepsin	60.761	2.1096	1.4	1	1	1	0.994	0.954	1.056	0.868	0.964	1.104	1.035	1.038	1.069	0.2166
Q3U3Q1	Serine/threonine-protein kinase ULK3 OS=Mus musculus OX=10090 GN=Ulk3	Ulk3	53.571	3.474	5.1	2	2	2	1.021	0.906	0.951	1.02	0.934	1.094	1.046	1.046	1.057	0.26348
Q3U3W5	Protein arginine N-methyltransferase 9 OS=Mus musculus OX=10090 GN=Prmt9	Prmt9	94.219	1.414	1.1	1	1	1
Q3U487	E3 ubiquitin-protein ligase HECTD3 OS=Mus musculus OX=10090 GN=Hectd3	Hectd3	97.346	39.643	10.8	7	9	7	0.995	0.923	0.952	1.048	1.016	1.07	1.008	0.969	1.037	0.32408
Q3U4H6	Hexosaminidase D OS=Mus musculus OX=10090 GN=Hexdc	Hexdc	54.576	18.036	10.9	4	6	4	0.828	0.73	0.956	0.868	0.972	1.42	1.233	1.06	1.385	0.0191399
Q3U5C7	Prickle-like protein 1 OS=Mus musculus OX=10090 GN=Prickle1	Prickle1	94.13	3.1359	2.2	2	2	2
Q3U5C8	Rho guanine nucleotide exchange factor 16 OS=Mus musculus OX=10090 GN=Arhgef16	Arhgef16	80.38	-2	1.1	1	1	1	1.013	1.08	1.008	1.052	0.965	0.922	0.917	1.059	0.93	0.09432
Q3U5Q7	UMP-CMP kinase 2, mitochondrial OS=Mus musculus OX=10090 GN=Cmpk2	Cmpk2	50.036	77.553	21.7	8	8	8	0.89	0.859	0.933	0.979	1.061	1.069	1.097	1.164	1.199	0.0020991
Q3U7R1	Extended synaptotagmin-1 OS=Mus musculus OX=10090 GN=Esyt1	Esyt1	121.55	33.344	11	10	12	10	1.114	1.053	0.914	1.107	0.908	0.93	0.848	1.068	0.896	0.151017
Q3U7U3	F-box only protein 7 OS=Mus musculus OX=10090 GN=Fbxo7	Fbxo7	57.648	33.74	9.8	3	3	3	1.086	0.854	0.791	0.999	1.005	1.141	0.983	1.154	1.148	0.136278
Q3U9G9	Lamin-B receptor OS=Mus musculus OX=10090 GN=Lbr	Lbr	71.439	14.614	8.9	6	6	6
Q3UA37	Glutamine-rich protein 1 OS=Mus musculus OX=10090 GN=Qrich1	Qrich1	86.555	9.774	5.1	4	4	4	0.968	1.041	0.882	1.051	0.977	1.071	0.901	1.13	1.035	0.62818
Q3UBG2	PTB-containing, cubilin and LRP1-interacting protein OS=Mus musculus OX=10090 GN=Pid1	Pid1	24.784	1.4606	3.2	1	1	1
Q3UBX0	Transmembrane protein 109 OS=Mus musculus OX=10090 GN=Tmem109	Tmem109	26.306	5.9684	8.6	2	2	2	1.034	1.073	1.061	1.205	0.813	0.969	0.908	0.962	0.835	0.0141418
Q3UBZ5	MIF4G domain-containing protein OS=Mus musculus OX=10090 GN=Mif4gd	Mif4gd	25.493	4.6615	13.5	2	2	2	1.137	1.153	0.857	0.827	0.789	1.095	1.076	1.098	1.021	0.85156
Q3UCQ1	Forkhead box protein K2 OS=Mus musculus OX=10090 GN=Foxk2	Foxk2	68.446	2.679	2.3	2	2	2
Q3UCV8	Ubiquitin thioesterase otulin OS=Mus musculus OX=10090 GN=Otulin	Otulin	40.32	8.891	11.4	4	5	4	0.964	0.986	0.961	1.018	1.074	0.995	1.018	0.981	1.035	0.20024
Q3UD01	Ataxin-7-like protein 3B OS=Mus musculus OX=10090 GN=Atxn7l3b	Atxn7l3b	10.731	8.6299	30.9	2	3	2	0.984	0.974	0.987	1.045	0.947	1.074	0.99	1.018	1.01	0.77816
Q3UDE2	Tubulin--tyrosine ligase-like protein 12 OS=Mus musculus OX=10090 GN=Ttll12	Ttll12	74.042	79.388	24.1	13	18	13	1.037	0.985	0.956	1.019	0.951	1.011	0.994	0.961	0.98	0.41806
Q3UDK1	TRAF-type zinc finger domain-containing protein 1 OS=Mus musculus OX=10090 GN=Trafd1	Trafd1	64.282	11.46	6.7	4	4	4	0.911	1.013	0.975	0.891	1.038	1.105	1.021	1.062	1.115	0.0186029
Q3UDP0	WD repeat-containing protein 41 OS=Mus musculus OX=10090 GN=Wdr41	Wdr41	51.51	57.008	21.1	7	7	7	1.203	0.851	0.859	1.136	0.824	1.188	0.88	1.078	0.98	0.88858
Q3UDR8	Protein YIPF3 OS=Mus musculus OX=10090 GN=Yipf3	Yipf3	37.998	3.2764	4.6	2	3	2	0.984	1.04	0.983	1.063	0.895	1.076	0.954	1.028	0.971	0.51794
Q3UE17	RNA-binding protein MEX3D OS=Mus musculus OX=10090 GN=Mex3d	Mex3d	65.329	12.29	5.6	3	3	3	1.01	0.972	1.013	1.005	0.992	1.046	1.053	0.926	1.004	0.92516
Q3UE31	Uncharacterized protein KIAA0930 homolog OS=Mus musculus OX=10090	---	45.96	18.82	22.5	9	9	9	1.015	1.048	0.914	0.895	1.086	1.052	1.066	1.022	1.091	0.070525
Q3UE37	Ubiquitin-conjugating enzyme E2 Z OS=Mus musculus OX=10090 GN=Ube2z	Ube2z	38.368	32.012	28.4	11	17	11	0.964	0.988	0.984	1.036	1.034	0.98	1.004	0.972	1.005	0.83154
Q3UEB3	Poly(U)-binding-splicing factor PUF60 OS=Mus musculus OX=10090 GN=Puf60	Puf60	60.248	107.58	31.7	17	28	17	1.016	0.994	0.989	1.022	0.987	0.999	0.987	1.003	0.989	0.26318
Q3UFF7	Lysophospholipase-like protein 1 OS=Mus musculus OX=10090 GN=Lyplal1	Lyplal1	26.354	9.0194	15.1	3	3	3	0.938	0.984	0.931	1.097	0.956	1.019	0.963	1.131	1.03	0.60502
Q3UFK8	FERM domain-containing protein 8 OS=Mus musculus OX=10090 GN=Frmd8	Frmd8	51.827	2.3354	2.4	1	1	1
Q3UFQ8	Capping protein, Arp2/3 and myosin-I linker protein 3 OS=Mus musculus OX=10090 GN=Carmil3	Carmil3	150.41	122.34	12.8	14	16	14	0.979	0.975	0.99	0.949	1.03	1.003	0.97	1.028	1.035	0.082221
Q3UFS0	Protein zyg-11 homolog B OS=Mus musculus OX=10090 GN=Zyg11b	Zyg11b	83.99	91.259	25.7	16	18	16	0.999	1.078	1.057	0.975	0.956	0.969	0.991	0.959	0.943	0.058924
Q3UFT3	GRB2-associated and regulator of MAPK protein OS=Mus musculus OX=10090 GN=Garem1	Garem1	97.249	5.2147	3.8	3	3	3	1.044	0.99	0.95	1.022	0.983	1.031	0.993	1.006	1.002	0.92628
[truncated: 4,412 more rows]
